# Supplementary material for: Construction of C(sp2)–S and C(sp2)–Se bonds via a silver(i)-mediated coupling reaction of heterocyclic ketene aminals with diaryl dichalcogenides
Source: Royal Society of Chemistry journal article supplement (doi:10.1039/c4ra02519a), 2014-01-01
Supplement: c4ra02519a1.pdf [file c4ra02519a1.pdf]

## Supporting Information

### Construction of C(sp<sup>2</sup>)-S and C(sp<sup>2</sup>)-Se Bonds *via* Silver(I)-Mediated Coupling Reaction of Heterocyclic Ketene Aminals with Diaryl Dichalcogenides

Xiu-Yang Jiang,<sup>[a]</sup> Zhi-Cheng Liu,<sup>[a]</sup> Li Fang,<sup>[a]</sup> Sheng-Jiao Yan<sup>\*[a]</sup> and Jun Lin<sup>\*[a,b]</sup>

<sup>a</sup> Key Laboratory of Medicinal Chemistry for Natural Resource (Yunnan University), Ministry of Education, School of Chemical Science and Technology, Yunnan University, Kunming, 650091, P. R. China.

<sup>b</sup> State Key Laboratory of Elemento-organic Chemistry, Nankai University, Tianjin, 300071, P. R. China.

\*E-mail: yansj@ynu.edu.cn or linjun@ynu.edu.cn  
Fax: (+86)-871-65033215; phone: (+86)-871-65033215

### Table of Contents

|                                                                          |      |
|--------------------------------------------------------------------------|------|
| General Information .....                                                | S2   |
| General Procedure for the Preparation of compounds <b>3–5</b> .....      | S2   |
| Analytic Data for the Products .....                                     | S3   |
| Crystal X-ray structure and packing diagrams of compound <b>3g</b> ..... | S21  |
| NMR spectra of compounds <b>3–5</b> .....                                | S25  |
| References and Notes .....                                               | S121 |

## General Information

All compounds were fully characterized by spectroscopic data. The NMR spectra were recorded on a Bruker DRX500 or DRX400, chemical shifts ( $\delta$ ) are expressed in ppm, and  $J$  values are given in Hz, and deuterated  $\text{CDCl}_3$  was used as solvent. The reactions were monitored by thin layer chromatography (TLC) using silica gel GF<sub>254</sub>. The melting points were determined on XT-4A melting point apparatus and are uncorrected. HRMs were performed on a Agilent LC/Msd TOF instrument.

All chemicals and solvents were used as received without further purification unless otherwise stated. Compounds **2** were prepared according to the literature.<sup>1</sup>

## General Procedure for the Preparation of Compounds 3–5

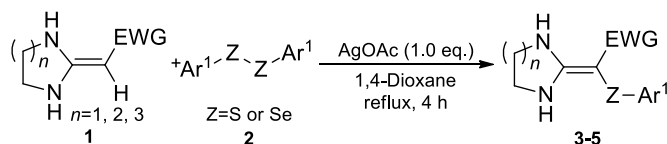

To a 25 ml round-bottom flask, HKAs **1** (1 mmol), 1,2-diphenyldiselenane **2** (1 mmol), AgOAc (1 mmol) in dioxane (15 mL) were added. The resulting mixture was heated to reflux and stirred until all starting diphenyldiselenane was consumed, as evidenced by TLC. After cooling to room temperature, the solid AgOAc was removed by filtration. The organic layer was then concentrated under reduced pressure to yield crude product. The crude compound was then purified by recrystallization with ethyl acetate and petroleum to afford compounds **3-5** as a white solid.

## Analytic Data for the Products

### 2-(Imidazolidin-2-ylidene)-1-phenyl-2-(phenylthio)ethanone (**3a**)

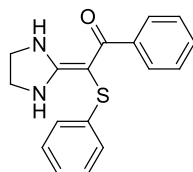

White solid, yield 94%; Mp 202–204 °C; IR (KBr): 3194, 1573, 1482, 1373, 1299, 735  $\text{cm}^{-1}$ ;  $^1\text{H}$  NMR (500 MHz,  $\text{CDCl}_3$ ):  $\delta$  = 3.53 (t,  $J$  = 8.8 Hz, 2H,  $\text{NCH}_2$ ), 3.88 (t,  $J$  = 8.8 Hz, 2H,  $\text{NCH}_2$ ), 5.78 (br, 1H, NH), 7.06–7.39 (m, ArH, 10H), 9.91 (br, 1H, NH);  $^{13}\text{C}$  NMR (125 MHz,  $\text{CDCl}_3$ ):  $\delta$  = 42.6, 45.8, 76.1, 124.7, 125.0, 127.4, 127.7, 129.1, 129.3, 141.0, 142.6, 168.7, 194.1; HRMS (TOF  $\text{ES}^+$ ):  $m/z$  calcd for  $\text{C}_{17}\text{H}_{16}\text{N}_2\text{NaOS}$  [(M+Na $^+$ )], 319.0876; found, 319.0874.

### 2-(Imidazolidin-2-ylidene)-1-(4-methoxyphenyl)-2-(phenylthio)ethanone (**3b**)

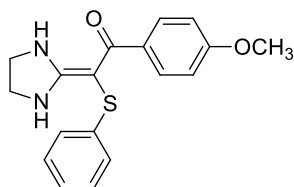

White solid, yield 97%; mp 176–177 °C; IR (KBr): 3366, 3269, 1576, 1369, 1241, 732  $\text{cm}^{-1}$ ;  $^1\text{H}$  NMR (500 MHz,  $\text{CDCl}_3$ ):  $\delta$  = 3.57 (t,  $J$  = 8.9 Hz, 2H,  $\text{NCH}_2$ ), 3.75 (s, 3H,  $\text{CH}_3$ ), 3.90 (t,  $J$  = 8.9 Hz, 2H,  $\text{NCH}_2$ ), 5.72 (br, 1H, NH), 6.74 (t,  $J$  = 8.6 Hz, 2H, ArH), 7.06–7.26 (m, 5H, ArH), 7.45 (t,  $J$  = 8.6 Hz, 2H, ArH), 9.95 (br, 1H, NH);  $^{13}\text{C}$  NMR (125 MHz,  $\text{CDCl}_3$ ):  $\delta$  = 42.6, 45.8, 55.6, 75.6, 112.9, 124.6, 125.0, 129.3, 129.6, 134.9, 141.0, 160.6, 168.9, 193.2; HRMS (TOF  $\text{ES}^+$ ):  $m/z$  calcd for  $\text{C}_{18}\text{H}_{18}\text{N}_2\text{NaO}_2\text{S}$  [(M+Na $^+$ )], 349.0981; found, 349.0971.

### 2-(Imidazolidin-2-ylidene)-2-(phenylthio)-1-(*p*-tolyl)ethanone (**3c**)

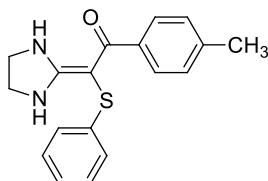

White solid, yield 94%; mp 213–214 °C; IR (KBr): 3416, 3285, 1579, 1531, 1365, 1298, 744  $\text{cm}^{-1}$ ;  $^1\text{H}$  NMR (500 MHz,  $\text{CDCl}_3$ ):  $\delta$  = 2.28 (s, 3H,  $\text{CH}_3$ ), 3.57 (t,  $J$  = 8.8 Hz, 2H,  $\text{NCH}_2$ ), 3.91 (t,  $J$  = 8.8 Hz, 2H,  $\text{NCH}_2$ ), 5.72 (br, 1H, NH), 7.02 (d,  $J$  = 7.8 Hz, 2H, ArH), 7.06–7.33 (m, ArH, 7H), 9.94 (br, 1H, NH);  $^{13}\text{C}$  NMR (125 MHz,  $\text{CDCl}_3$ ):  $\delta$  = 21.8, 42.6,

45.8, 75.9, 124.7, 124.9, 127.5, 128.4, 129.3, 139.1, 139.7, 141.0, 168.7, 194.1; HRMS (TOF ES<sup>+</sup>): m/z calcd for C<sub>18</sub>H<sub>18</sub>N<sub>2</sub>NaOS [(M+Na<sup>+</sup>)], 333.1032; found, 333.1027.

1-(4-Fluorophenyl)-2-(imidazolidin-2-ylidene)-2-(phenylthio)ethanone (**3d**)

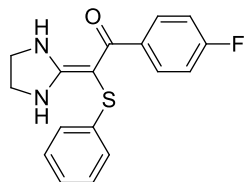

White solid, yield 93%; mp 182–183 °C; IR (KBr): 3305, 1580, 1532, 1370, 1303, 743 cm<sup>-1</sup>; <sup>1</sup>H NMR (500MHz,CDCl<sub>3</sub>): δ = 3.50–3.57 (m, 2H, NCH<sub>2</sub>), 3.85–3.89 (m, 2H, NCH<sub>2</sub>), 5.80 (br, 1H, NH), 6.84–7.41 (m, 9H, ArH), 9.86 (br, 1H, NH); <sup>13</sup>C NMR (125 MHz, CDCl<sub>3</sub>) : δ = 42.6, 45.8, 75.9, 114.5 (d, J = 20.0 Hz), 124.6, 125.1, 129.4, 129.7, 138.6, 140.7, 163.4 (d, J = 245.0 Hz), 168.7, 192.7; HRMS (TOF ES<sup>+</sup>): m/z calcd for C<sub>17</sub>H<sub>15</sub>FN<sub>2</sub>NaOS [(M+Na<sup>+</sup>)], 337.0781; found, 337.0783.

1-(4-Chlorophenyl)-2-(imidazolidin-2-ylidene)-2-(phenylthio)ethanone (**3e**)

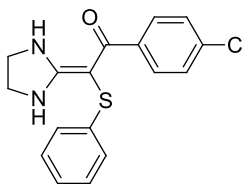

White solid, yield 89%; mp 200–202 °C; IR (KBr): 3413, 3267, 1579, 1532, 1370, 1306, 742 cm<sup>-1</sup>; <sup>1</sup>H NMR (500 MHz,CDCl<sub>3</sub>): δ = 3.56 (t, J = 8.9 Hz, 2H, NCH<sub>2</sub>), 3.90 (t, J = 8.9 Hz, 2H, NCH<sub>2</sub>), 5.80 (br, 1H, NH), 7.06–7.34 (m, 9H, ArH), 9.85 (br, 1H, NH); <sup>13</sup>C NMR (125 MHz, CDCl<sub>3</sub>): δ = 42.6, 45.8, 76.0, 124.6, 125.2, 127.9, 129.0, 129.4, 134.9, 140.6, 140.9, 168.7, 192.6; HRMS (TOF ES<sup>+</sup>): m/z calcd for C<sub>17</sub>H<sub>15</sub>ClN<sub>2</sub>NaOS [(M+Na<sup>+</sup>)], 353.0486; found, 353.0486.

1-(2-Chlorophenyl)-2-(imidazolidin-2-ylidene)-2-(phenylthio)ethanone (**3f**)

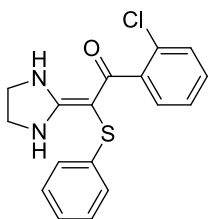

White solid, yield 85%; mp 194–195 °C; IR (KBr): 3193, 1582, 1540, 1482, 1381, 1299, 747 cm<sup>-1</sup>; <sup>1</sup>H NMR (500 MHz,CDCl<sub>3</sub>): δ = 3.58 (t, J = 8.9 Hz, 2H, NCH<sub>2</sub>), 3.92 (t, J = 8.9 Hz, 2H, NCH<sub>2</sub>), 5.80 (br, 1H, NH), 7.05–7.30 (m, 9H, ArH), 9.74 (br, 1H, NH); <sup>13</sup>C

NMR (125 MHz, CDCl<sub>3</sub>):  $\delta$  = 42.5, 45.7, 125.1, 126.3, 127.6, 129.0, 129.5, 130.6, 140.2, 142.2, 168.0, 192.1; HRMS (TOF ES<sup>+</sup>):  $m/z$  calcd for C<sub>17</sub>H<sub>15</sub>ClN<sub>2</sub>NaOS [(M+Na<sup>+</sup>)], 353.0486; found, 353.0485.

2-(Imidazolidin-2-ylidene)-2-((4-methoxyphenyl)selanyl)-1-phenylethanone (**3g**)

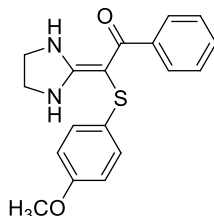

White solid, yield 94%, mp 218–220 °C; IR (KBr): 3403, 3304, 1589, 1533, 1482, 1367, 1298, 700 cm<sup>-1</sup>; <sup>1</sup>H NMR (500 MHz, CDCl<sub>3</sub>):  $\delta$  = 3.55 (t,  $J$  = 8.9 Hz, 2H, NCH<sub>2</sub>), 3.70 (s, 3H, CH<sub>3</sub>), 3.88 (t,  $J$  = 8.9 Hz, 2H, NCH<sub>2</sub>), 5.82 (br, 1H, NH), 6.78–7.40 (m, 9H, ArH), 9.87 (br, 1H, NH); <sup>13</sup>C NMR (125 MHz, CDCl<sub>3</sub>):  $\delta$  = 42.6, 45.8, 55.8, 115.1, 126.4, 127.1, 127.4, 127.7, 129.1, 131.6, 142.7, 157.9, 168.8, 194.1; HRMS (TOF ES<sup>+</sup>):  $m/z$  calcd for C<sub>18</sub>H<sub>19</sub>N<sub>2</sub>O<sub>2</sub>S [(M+H<sup>+</sup>)], 327.1162; found, 327.1168.

2-(Imidazolidin-2-ylidene)-1-phenyl-2-(*p*-tolylselanyl)ethanone (**3h**)

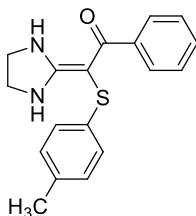

White solid, yield 95%; mp 196–197 °C; IR (KBr): 3424, 3318, 1578, 1359, 1298, 702 cm<sup>-1</sup>; <sup>1</sup>H NMR (500 MHz, CDCl<sub>3</sub>):  $\delta$  = 2.29 (s, 3H, ArCH<sub>3</sub>), 3.49–3.53 (m, 2H, NCH<sub>2</sub>), 3.85–3.88 (m, 2H, NCH<sub>2</sub>), 5.77 (br, 1H, NH), 7.01–7.41 (m, 9H, ArH), 9.91 (br, 1H, NH); <sup>13</sup>C NMR (125 MHz, CDCl<sub>3</sub>):  $\delta$  = 21.3, 42.6, 45.8, 76.4, 124.8, 127.4, 127.7, 129.1, 130.1, 134.7, 137.4, 142.7, 168.7, 194.0; HRMS (TOF ES<sup>+</sup>):  $m/z$  calcd for C<sub>18</sub>H<sub>19</sub>N<sub>2</sub>OS [(M+H<sup>+</sup>)], 311.1213; found, 311.1216.

2-((4-Chlorophenyl)selanyl)-2-(imidazolidin-2-ylidene)-1-phenylethanone (**3i**)

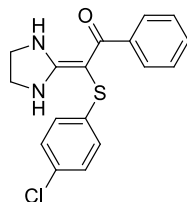

White solid, yield 90%; mp 211–213 °C; IR (KBr): 3200, 1581, 1377, 1299, 705 cm<sup>-1</sup>; <sup>1</sup>H NMR (500 MHz, CDCl<sub>3</sub>): δ = 3.58 (t, *J* = 8.7 Hz, 2H, NCH<sub>2</sub>), 3.91 (t, *J* = 8.7 Hz, 2H, NCH<sub>2</sub>), 5.73 (br, 1H, NH), 7.03–7.37 (m, 9H, ArH), 9.90 (br, 1H, NH); <sup>13</sup>C NMR (125 MHz, CDCl<sub>3</sub>): δ = 42.6, 45.8, 75.8, 126.0, 127.3, 127.7, 129.2, 129.3, 130.7, 139.6, 142.4, 168.6, 194.2; HRMS (TOF ES<sup>+</sup>): *m/z* calcd for C<sub>17</sub>H<sub>16</sub>ClN<sub>2</sub>OS [(M+H<sup>+</sup>)], 331.0666; found, 331.0663.

2-((3,5-Dichlorophenyl)selanyl)-2-(imidazolidin-2-ylidene)-1-phenylethanone (**3j**)

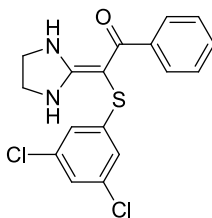

White solid, yield 84%; mp 213–214 °C; IR (KBr): 3208, 1575, 1377, 1300, 793 cm<sup>-1</sup>; <sup>1</sup>H NMR (500 MHz, CDCl<sub>3</sub>): δ = 3.55–3.61 (m, 2 H, NCH<sub>2</sub>), 3.89–3.94 (m, 2 H, NCH<sub>2</sub>), 5.76 (br, 1 H, NH), 6.95–7.34 (m, 8H, ArH), 9.89 (br, 1H, NH); <sup>13</sup>C NMR (125 MHz, CDCl<sub>3</sub>): δ = 42.6, 45.8, 74.7, 122.7, 125.2, 127.2, 127.8, 129.3, 135.8, 142.2, 145.3, 168.3, 194.1; HRMS (TOF ES<sup>+</sup>): *m/z* calcd for C<sub>17</sub>H<sub>15</sub>Cl<sub>2</sub>N<sub>2</sub>OS [(M+H<sup>+</sup>)], 365.0277; found, 365.0258.

2-((3-Fluorophenyl)selanyl)-2-(imidazolidin-2-ylidene)-1-phenylethanone (**3k**)

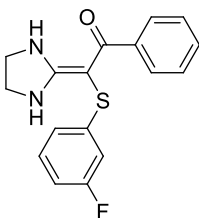

White solid, yield 88%; mp 204–205 °C; IR (KBr): 3423, 3305, 1581, 1367, 1299, 733 cm<sup>-1</sup>; <sup>1</sup>H NMR (500 MHz, CDCl<sub>3</sub>): δ = 3.53 (t, *J* = 8.8 Hz, 2 H, NCH<sub>2</sub>), 3.88 (t, *J* = 8.8 Hz, 2 H, NCH<sub>2</sub>), 5.79 (br, 1 H, NH), 6.73–7.36 (m, 9H, ArH), 9.89 (br, 1 H, NH); <sup>13</sup>C NMR (125 MHz, CDCl<sub>3</sub>): δ = 42.6, 45.8, 75.5, 111.5 (d, *J* = 23.7 Hz), 111.9 (d, *J* = 21.3 Hz), 112.0, 120.3, 127.3, 127.8, 129.2, 130.6, 144.0, 163.2 (d, *J* = 245.0 Hz), 168.5, 194.1; HRMS (TOF ES<sup>+</sup>): *m/z* calcd for C<sub>17</sub>H<sub>16</sub>FN<sub>2</sub>OS [(M+H<sup>+</sup>)], 315.0962; found, 315.0965.

2-(Imidazolidin-2-ylidene)-1-phenyl-2-(phenylselanyl)ethanone (**3l**)

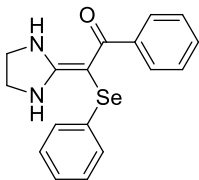

White solid, yield 91%; mp 161–163 °C; IR (KBr): 3409, 3310, 1573, 1368, 1297, 728  $\text{cm}^{-1}$ ;  $^1\text{H}$  NMR (500 MHz,  $\text{CDCl}_3$ ):  $\delta$  = 3.48–3.52 (m, 2H,  $\text{NCH}_2$ ), 3.86–3.90 (m, 2H,  $\text{NCH}_2$ ), 5.78 (br, 1H, NH), 7.11–7.34 (m, 10H, ArH), 9.98 (br, 1H, NH);  $^{13}\text{C}$  NMR (125 MHz,  $\text{CDCl}_3$ ):  $\delta$  = 42.5, 46.0, 73.9, 125.8, 127.3, 127.5, 127.6, 128.9, 129.5, 135.7, 143.7, 168.5, 194.2; HRMS (TOF  $\text{ES}^+$ ):  $m/z$  calcd for  $\text{C}_{17}\text{H}_{16}\text{N}_2\text{NaOSe}$  [ $\text{M}+\text{Na}^+$ ], 367.0320; found, 367.0315.

2-(Imidazolidin-2-ylidene)-1-(4-methoxyphenyl)-2-(phenylselanyl)ethanone (**3m**)

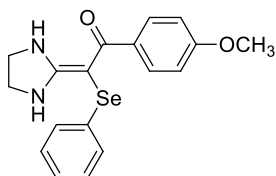

White solid, yield 93%; mp 144–146 °C; IR (KBr): 3309, 1603, 1347, 818, 737  $\text{cm}^{-1}$ ;  $^1\text{H}$  NMR (500 MHz,  $\text{CDCl}_3$ ):  $\delta$  = 3.57–3.61 (m, 2H,  $\text{NCH}_2$ ), 3.78 (s, 3H,  $\text{OCH}_3$ ), 3.93–3.96 (m, 2H,  $\text{NCH}_2$ ), 5.77 (br, 1H, NH), 6.75–7.43 (m, 9H, ArH), 10.04 (br, 1H, NH);  $^{13}\text{C}$  NMR (125 MHz,  $\text{CDCl}_3$ ):  $\delta$  = 42.6, 46.0, 55.6, 73.5, 112.9, 125.8, 127.4, 129.5, 129.6, 135.8, 135.9, 160.5, 168.7, 193.5; HRMS (TOF  $\text{ES}^+$ ):  $m/z$  calcd for  $\text{C}_{18}\text{H}_{19}\text{N}_2\text{O}_2\text{Se}$  [ $\text{M}+\text{H}^+$ ] 375.0606; found, 375.0601.

2-(Imidazolidin-2-ylidene)-2-(phenylselanyl)-1-(*p*-tolyl)ethanone (**3n**)

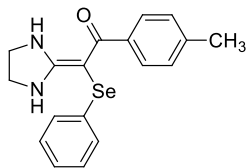

White solid, yield 91%; mp: 205–207 °C; IR (KBr): 3391, 3252, 1572, 1529, 1366, 1300, 733  $\text{cm}^{-1}$ ;  $^1\text{H}$  NMR (500 MHz,  $\text{CDCl}_3$ ):  $\delta$  = 2.12 (s,  $\text{ArCH}_3$ ), 3.55–3.66 (m, 2H,  $\text{NCH}_2$ ), 3.88–3.95 (m, 2H,  $\text{NCH}_2$ ), 5.74 (br, 1H, NH), 6.74 (d,  $J$  = 8.6 Hz, 2H, ArH), 7.12–7.27 (m, 5H, ArH), 7.39 (d,  $J$  = 8.6 Hz, 2H, ArH), 10.02 (br, 1H, NH);  $^{13}\text{C}$  NMR (125 MHz,  $\text{CDCl}_3$ ):  $\delta$  = 42.6, 46.0, 55.6, 67.5, 112.8, 125.8, 127.4, 129.5, 129.6, 135.8, 135.9, 160.5, 168.7, 193.5; HRMS (TOF  $\text{ES}^+$ ):  $m/z$  calcd for  $\text{C}_{18}\text{H}_{19}\text{Na}_2\text{OSe}$  [ $\text{M}+\text{H}^+$ ], 359.0657; found, 359.0661.

1-(4-Fluorophenyl)-2-(imidazolidin-2-ylidene)-2-(phenylselanyl)ethanone (**3o**)

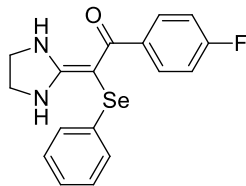

White solid, yield 87%; mp 167–169 °C; IR (KBr): 3412, 3312, 1575, 1525, 1367, 1298, 726  $\text{cm}^{-1}$ ;  $^1\text{H}$  NMR (500 MHz,  $\text{CDCl}_3$ ):  $\delta$  = 3.53–3.58 (m, 2H,  $\text{NCH}_2$ ), 3.90–3.94 (m, 2H,  $\text{NCH}_2$ ), 5.81 (br, 1H, NH), 6.85–6.90 (m, 2H, ArH), 7.14–7.15 (m, 1H, ArH), 7.22–7.37 (m, 6H, ArH), 9.96 (br, 1H, NH);  $^{13}\text{C}$  NMR (125 MHz,  $\text{CDCl}_3$ ):  $\delta$  = 42.5, 46.0, 73.7, 114.5 (d,  $J$  = 20.0 Hz), 126.0, 127.4, 129.6, 129.6, 135.5, 139.6, 163.2 (d,  $J$  = 246.3 Hz), 168.6, 192.9; HRMS (TOF  $\text{ES}^+$ ):  $m/z$  calcd for  $\text{C}_{17}\text{H}_{16}\text{FN}_2\text{OSe}$  [( $\text{M}+\text{H}^+$ )], 363.0406; found, 363.0412.

1-(4-Chlorophenyl)-2-(imidazolidin-2-ylidene)-2-(phenylselanyl)ethanone (**3p**)

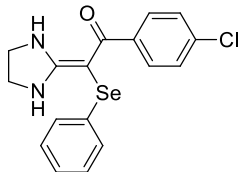

White solid, yield 88%; mp 184–186 °C; IR (KBr): 3405, 3263, 1576, 1528, 1369, 1305, 736  $\text{cm}^{-1}$ ;  $^1\text{H}$  NMR (500 MHz,  $\text{CDCl}_3$ ):  $\delta$  = 3.56–3.60 (m, 2H,  $\text{NCH}_2$ ), 3.91–3.96 (m, 2H,  $\text{NCH}_2$ ), 5.77 (br, 1H, NH), 7.13–7.28 (m, 9H, ArH), 9.95 (br, 1H, NH);  $^{13}\text{C}$  NMR (125 MHz,  $\text{CDCl}_3$ ):  $\delta$  = 42.5, 46.0, 73.7, 126.0, 127.3, 127.8, 128.9, 129.6, 134.7, 135.4, 141.9, 168.6, 192.8; HRMS (TOF  $\text{ES}^+$ ):  $m/z$  calcd for  $\text{C}_{17}\text{H}_{16}\text{ClN}_2\text{OSe}$  [( $\text{M}+\text{H}^+$ )], 379.0111; found, 379.0103.

2-(nitro(phenylthio)methylene)imidazolidine (**3q**)

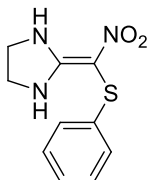

White solid, yield 88%; mp 163.5–164 °C; IR (KBr): 3350, 3256, 1576, 1392, 1335, 738  $\text{cm}^{-1}$ ;  $^1\text{H}$  NMR (500 MHz,  $\text{CDCl}_3$ ):  $\delta$  = 3.75–3.79 (m, 2H,  $\text{NCH}_2$ ), 3.95–4.00 (m, 2H,  $\text{NCH}_2$ ), 5.83 (br, 1H, NH), 7.13–7.17 (m, 3H, ArH), 7.24–7.28 (m, 2H, ArH), 8.83 (br, 1H, NH);  $^{13}\text{C}$  NMR (125 MHz,  $\text{CDCl}_3$ ):  $\delta$  = 43.1, 45.6, 98.4, 125.6, 125.9, 129.1, 136.1, 163.3; HRMS (TOF  $\text{ES}^+$ ):  $m/z$  calcd for  $\text{C}_{10}\text{H}_{11}\text{N}_3\text{NaO}_2\text{S}$  [( $\text{M}+\text{Na}^+$ )], 260.0464; found, 260.0462.



1-Phenyl-2-(phenylthio)-2-(tetrahydropyrimidin-2(1*H*)-ylidene)ethanone (**4a**)

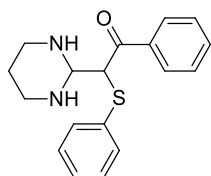

White solid, yield 95%; mp 167–1689 °C; IR (KBr): 3352, 3279, 1586, 1344, 1205, 742  $\text{cm}^{-1}$ ;  $^1\text{H}$  NMR (500 MHz,  $\text{CDCl}_3$ ):  $\delta$  = 1.79–1.82 (m, 2H,  $\text{NCH}_2$ ), 3.27–3.43 (m, 4H,  $\text{NCH}_2$ ), 6.49 (br, 1H, NH), 7.04–7.08 (m, 3H, ArH), 7.15–7.18 (m, 4H, ArH), 7.24–7.28 (m, 2H, ArH);  $^{13}\text{C}$  NMR (125 MHz,  $\text{CDCl}_3$ ):  $\delta$  = 20.4, 38.8, 39.5, 78.4, 124.7, 125.0, 126.8, 127.7, 128.5, 129.2, 141.0, 143.9, 160.8, 193.0; HRMS (TOF  $\text{ES}^+$ ):  $m/z$  calcd for  $\text{C}_{18}\text{H}_{19}\text{N}_2\text{OS}$  [( $\text{M}+\text{H}^+$ )], 311.1213; found, 211.1209.

1-(4-Methoxyphenyl)-2-(phenylthio)-2-(tetrahydropyrimidin-2(1*H*)-ylidene)ethanone (**4b**)

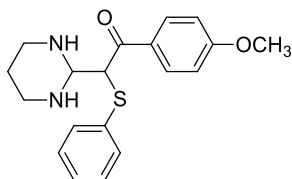

White solid, yield 98%; mp 177–178 °C; IR (KBr): 3364, 3050, 1585, 1344, 1241, 735  $\text{cm}^{-1}$ ;  $^1\text{H}$  NMR (500 MHz,  $\text{CDCl}_3$ ):  $\delta$  = 1.93–1.96 (m, 2H,  $\text{CH}_2$ ), 3.30–3.35 (m, 2H,  $\text{NCH}_2$ ), 3.43–3.49 (m, 2H,  $\text{NCH}_2$ ), 3.74 (s, 3H,  $\text{OCH}_3$ ), 6.49 (br, 1H, NH), 6.71 (d,  $J$  = 7.3 Hz, 2H, ArH), 7.08–7.26 (m, 5H, ArH), 7.33 (d,  $J$  = 7.3 Hz, 2H, ArH), 12.05 (br, 1H, NH);  $^{13}\text{C}$  NMR (125 MHz,  $\text{CDCl}_3$ ):  $\delta$  = 20.4, 38.8, 39.5, 55.5, 112.9, 124.6, 125.0, 128.9, 129.3, 136.3, 141.1, 160.0, 160.9, 192.4; HRMS (TOF  $\text{ES}^+$ ):  $m/z$  calcd for  $\text{C}_{19}\text{H}_{21}\text{N}_2\text{O}_2\text{S}$  [( $\text{M}+\text{H}^+$ )], 341.1318; found, 341.1316.

2-(Phenylthio)-2-(tetrahydropyrimidin-2(1*H*)-ylidene)-1-(*p*-tolyl)ethanone (**4c**)

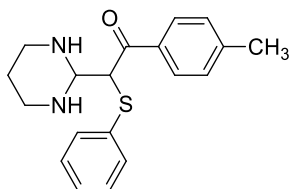

White solid, yield 96%; mp 175–177 °C; IR (KBr): 3330, 3052, 1584, 1339, 1164, 746  $\text{cm}^{-1}$ ;  $^1\text{H}$  NMR (500 MHz,  $\text{CDCl}_3$ ):  $\delta$  = 1.88–1.92 (m, 2H,  $\text{NCH}_2$ ), 2.26 (s, 3H,  $\text{ArCH}_3$ ), 3.25–3.29 (m, 2H,  $\text{NCH}_2$ ), 3.40–3.47 (m, 2H,  $\text{NCH}_2$ ), 6.48 (br, 1H, NH), 6.98 (d,  $J$  = 7.6 Hz, 2H, ArH), 6.97–7.12 (m, 3H, ArH), 7.22–7.25 (m, 4H, ArH);  $^{13}\text{C}$  NMR (125 MHz,  $\text{CDCl}_3$ ):  $\delta$  = 20.4, 21.8, 38.8, 39.5, 78.2, 124.6, 125.0, 127.0, 128.3, 129.2, 138.3, 141.1,

160.8, 193.0; HRMS (TOF ES<sup>+</sup>): m/z calcd for C<sub>19</sub>H<sub>21</sub>N<sub>2</sub>OS, [(M+H<sup>+</sup>)], 325.1369; found, 325.1365.

1-(4-Fluorophenyl)-2-(phenylthio)-2-(tetrahydropyrimidin-2(1*H*)-ylidene)ethanone (**4d**)

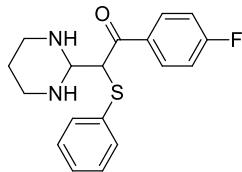

White solid, yield 92%; mp 122–124 °C; IR (KBr): 3322, 3060, 1586, 1343, 1210, 746 cm<sup>-1</sup>; <sup>1</sup>H NMR (400 MHz, CDCl<sub>3</sub>): δ = 1.93–1.99 (m, 2H, CH<sub>2</sub>), 3.39–3.43 (m, 4H, NCH<sub>2</sub>), 6.51 (br, 1H, NH), 6.83–7.32 (m, 9H, ArH), 11.92 (br, 1H, NH); <sup>13</sup>C NMR (100 MHz, CDCl<sub>3</sub>): δ = 20.0, 39.0, 39.0, 77.9, 114.1 (d, *J* = 26.3 Hz), 124.2, 124.7, 128.6 (d, *J* = 8.0 Hz), 128.9, 139.4, 140.3, 160.4, 162.5 (d, *J* = 245.0 Hz), 191.3; HRMS (TOF ES<sup>+</sup>): m/z calcd for C<sub>18</sub>H<sub>17</sub>FN<sub>2</sub>NaOS [(M+Na<sup>+</sup>)], 351.0938; found, 351.0637.

1-(4-Chlorophenyl)-2-(phenylthio)-2-(tetrahydropyrimidin-2(1*H*)-ylidene)ethanone (**4e**)

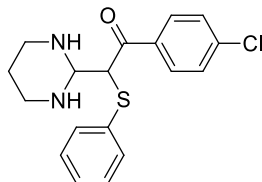

White solid, yield 90%; mp 180–181 °C; IR (KBr): 330, 3052, 1584, 1339, 1164, 746 cm<sup>-1</sup>; <sup>1</sup>H NMR (500 MHz, CDCl<sub>3</sub>): δ = 1.95–1.98 (m, 2H, CH<sub>2</sub>), 3.39–3.44 (m, 4H, NCH<sub>2</sub>), 6.52 (br, 1H, NH), 7.07–7.48 (m, 9H, ArH), 11.85 (br, 1H, NH); <sup>13</sup>C NMR (125 MHz, CDCl<sub>3</sub>): δ = 20.4, 39.1, 39.1, 78.5, 124.6, 125.2, 127.9, 128.5, 129.3, 134.2, 140.6, 142.2, 160.8, 191.6; HRMS (TOF ES<sup>+</sup>): m/z calcd for C<sub>18</sub>H<sub>17</sub>ClN<sub>2</sub>NaOS [(M+Na<sup>+</sup>)], 367.0642; found, 367.0637.

1-(2-Chlorophenyl)-2-(phenylthio)-2-(tetrahydropyrimidin-2(1*H*)-ylidene)ethanone (**4f**)

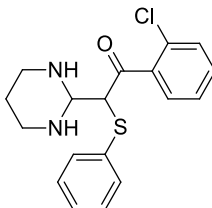

White solid, yield 87%; mp 163–165 °C; IR (KBr): 3261, 1593, 1341, 1210, 747 cm<sup>-1</sup>; <sup>1</sup>H NMR (400 MHz, CDCl<sub>3</sub>): δ = 1.95–1.99 (m, 2H, CH<sub>2</sub>), 3.38–3.44 (m, 4H, NCH<sub>2</sub>), 7.00–7.28 (m, 9H, ArH); <sup>13</sup>C NMR (100 MHz, CDCl<sub>3</sub>): δ = 19.9, 38.7, 38.7, 79.5, 124.5,

124.7, 125.9, 126.9, 128.4, 128.6, 129.1, 130.1, 139.7, 142.4, 160.0, 189.9; HRMS (TOF ES<sup>+</sup>): m/z calcd for C<sub>18</sub>H<sub>17</sub>ClN<sub>2</sub>NaOS [(M+Na<sup>+</sup>)], 367.0642; found, 367.0635.

2-((4-Methoxyphenyl)selanyl)-1-phenyl-2-(tetrahydropyrimidin-2(1*H*)-ylidene)ethanone (**4g**)

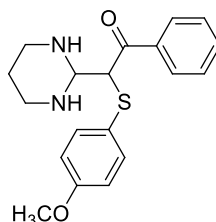

White solid, yield 95%; mp 174–176 °C; IR (KBr): 3368, 3187, 1592, 1354, 1232, 743 cm<sup>-1</sup>; <sup>1</sup>H NMR (400 MHz, CDCl<sub>3</sub>): δ = 1.93–1.96 (m, 2H, CH<sub>2</sub>), 3.35–3.45 (m, 4H, NCH<sub>2</sub>), 3.76 (s, 3H, OCH<sub>3</sub>), 6.56 (br, 1H, NH), 6.78–7.31 (m, 9H, ArH), 11.93 (br, 1H, NH); <sup>13</sup>C NMR (100 MHz, CDCl<sub>3</sub>): δ = 20.1, 38.9, 38.9, 55.5, 79.2, 114.7, 125.8, 126.6, 127.3, 128.1, 131.4, 143.6, 157.5, 160.5, 192.6; HRMS (TOF ES<sup>+</sup>): m/z calcd for C<sub>19</sub>H<sub>21</sub>N<sub>2</sub>O<sub>2</sub>S [(M+H<sup>+</sup>)], 341.1318; found, 341.1319.

1-Phenyl-2-(tetrahydropyrimidin-2(1*H*)-ylidene)-2-(*p*-tolylselanyl)ethanone (**4h**)

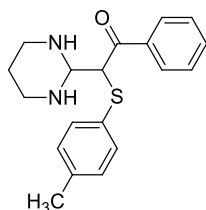

White solid, yield 96%; mp 213–214 °C; IR (KBr): 3369, 1593, 1342, 1208, 800 cm<sup>-1</sup>; <sup>1</sup>H NMR (500 MHz, CDCl<sub>3</sub>): δ = 1.94–1.97 (m, 2H, CH<sub>2</sub>), 2.29 (s, 3H, ArCH<sub>3</sub>), 3.31–3.34 (m, 2H, NCH<sub>2</sub>), 3.45–3.49 (m, 2H, NCH<sub>2</sub>), 6.51 (br, 1H, NH), 6.99–7.32 (m, 9H, ArH), 11.97 (br, 1H, NH); <sup>13</sup>C NMR (125 MHz, CDCl<sub>3</sub>): δ = 20.4, 21.3, 38.8, 39.5, 78.7, 124.7, 126.9, 127.6, 128.4, 130.0, 134.7, 137.4, 143.9, 160.8, 193.0; HRMS (TOF ES<sup>+</sup>): m/z calcd for C<sub>19</sub>H<sub>21</sub>N<sub>2</sub>O S [(M+H<sup>+</sup>)], 325.1369; found, 325.1364.

2-((4-Chlorophenyl)selanyl)-1-phenyl-2-(tetrahydropyrimidin-2(1*H*)-ylidene)ethanone (**4i**)

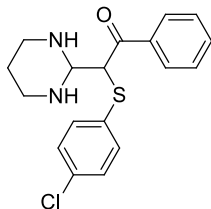

White solid, yield 93%; mp 210–211 °C; IR (KBr): 3360, 1588, 1344, 1210, 809  $\text{cm}^{-1}$ ;  $^1\text{H}$  NMR (500 MHz,  $\text{CDCl}_3$ ):  $\delta$  = 1.93–1.96 (m, 2H,  $\text{CH}_2$ ), 3.33–3.36 (m, 2H,  $\text{NCH}_2$ ), 3.44–3.47 (m, 2H,  $\text{NCH}_2$ ), 6.43 (br, 1H, NH), 7.00–7.27 (m, 9H, ArH), 11.89 (br, 1H, NH);  $^{13}\text{C}$  NMR (125 MHz,  $\text{CDCl}_3$ ):  $\delta$  = 20.4, 38.8, 39.5, 78.1, 125.9, 126.7, 127.7, 128.6, 129.3, 130.7, 139.6, 143.7, 160.7, 193.1; HRMS (TOF  $\text{ES}^+$ ):  $m/z$  calcd for  $\text{C}_{18}\text{H}_{18}\text{ClN}_2\text{OS}$  [( $\text{M}+\text{H}^+$ )], 345.0823, found, 345.0829.

2-((3,5-Dichlorophenyl)selanyl)-1-phenyl-2-(tetrahydropyrimidin-2(1H)-ylidene)ethanone (**4j**)

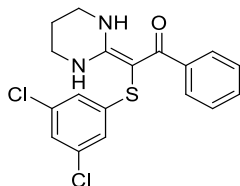

White solid, yield 85%; mp 223–225 °C; IR (KBr): 3276, 3067, 1596, 1334, 1214, 786  $\text{cm}^{-1}$ ;  $^1\text{H}$  NMR (500 MHz,  $\text{CDCl}_3$ ):  $\delta$  = 1.96–2.01 (m, 2H,  $\text{CH}_2$ ), 3.34–3.38 (m, 2H,  $\text{NCH}_2$ ), 3.46–3.50 (m, 2H,  $\text{NCH}_2$ ), 6.35 (br, 1H, NH), 6.94–7.27 (m, 8H, ArH), 11.89 (br, 1H, NH);  $^{13}\text{C}$  NMR (125 MHz,  $\text{CDCl}_3$ ):  $\delta$  = 20.3, 38.8, 39.6, 122.7, 125.2, 126.7, 127.8, 128.7, 135.8, 143.5, 145.3, 160.5, 193.4; HRMS (TOF  $\text{ES}^+$ ):  $m/z$  calcd for  $\text{C}_{18}\text{H}_{17}\text{Cl}_2\text{N}_2\text{OS}$  [( $\text{M}+\text{H}^+$ )], 379.0433; found, 379.0437.

2-((4-Fluorophenyl)selanyl)-1-phenyl-2-(tetrahydropyrimidin-2(1H)-ylidene)ethanone (**4k**)

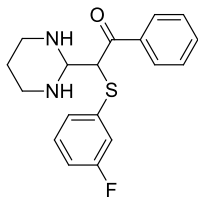

White solid, yield 92%; mp 181–183 °C; IR (KBr): 3283, 1590, 1342, 1210, 780  $\text{cm}^{-1}$ ;  $^1\text{H}$  NMR (500 MHz,  $\text{CDCl}_3$ ):  $\delta$  = 1.95–1.98 (m, 2H,  $\text{CH}_2$ ), 3.32–3.36 (m, 2H,  $\text{NCH}_2$ ), 3.67–3.72 (m, 2H,  $\text{NCH}_2$ ), 6.43 (br, 1H, NH), 6.73–7.29 (m, 9H, ArH), 11.93 (br, 1H, NH);  $^{13}\text{C}$  NMR (125 MHz,  $\text{CDCl}_3$ ):  $\delta$  = 20.4, 38.8, 39.5, 111.5 (d,  $J$  = 23.8 Hz), 112.0 (d,

$J = 21.3$  Hz), 120.3, 123.1, 126.8, 127.7, 128.6, 130.5, 143.9, 160.7, 163.6 (d,  $J = 246.3$  Hz), 164.8, 193.2; HRMS (TOF ES<sup>+</sup>):  $m/z$  calcd for C<sub>18</sub>H<sub>18</sub>FN<sub>2</sub>OS [(M+H<sup>+</sup>)], 329.1118; found, 329.1118.

1-Phenyl-2-(phenylselanyl)-2-(tetrahydropyrimidin-2(1*H*)-ylidene)ethanone (**4l**)

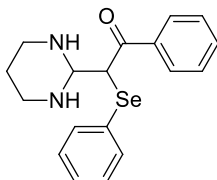

White solid, yield 92%; mp 162–164 °C; IR (KBr): 3353, 1587, 1343, 741 cm<sup>-1</sup>; <sup>1</sup>H NMR (500 MHz, CDCl<sub>3</sub>):  $\delta = 1.94$ – $1.98$  (m, 2H, CH<sub>2</sub>), 3.32–3.37 (m, 2H, NCH<sub>2</sub>), 3.46–3.50 (m, 2H, NCH<sub>2</sub>), 6.57 (br, <sup>1</sup>H, NH), 7.15–7.31 (m, 10H, ArH), 12.12 (br, 1H, NH); <sup>13</sup>C NMR (125 MHz, CDCl<sub>3</sub>):  $\delta = 20.0$ , 38.5, 39.2, 77.8, 125.3, 126.3, 126.8, 127.1, 127.7, 129.0, 135.3, 144.6, 160.1, 192.6; HRMS (TOF ES<sup>+</sup>):  $m/z$  calcd for C<sub>18</sub>H<sub>19</sub>N<sub>2</sub>OSe [(M+H<sup>+</sup>)], 359.0657, found, 359.0668.

1-(4-Methoxyphenyl)-2-(phenylselanyl)-2-(tetrahydropyrimidin-2(1*H*)-ylidene)ethanone (**4m**)

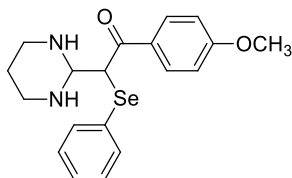

White solid, yield 95%; mp 154–156 °C; IR (KBr): 3353, 1581, 1344, 1240, 799 cm<sup>-1</sup>; <sup>1</sup>H NMR (500 MHz, CDCl<sub>3</sub>):  $\delta = 1.90$ – $1.95$  (m, 2H, CH<sub>2</sub>), 3.33–3.45 (m, 4H, NCH<sub>2</sub>), 3.73 (s, 3H, OCH<sub>3</sub>), 6.53 (br, 1H, NH), 6.69–7.29 (m, 9H, ArH); <sup>13</sup>C NMR (125 MHz, CDCl<sub>3</sub>):  $\delta = 20.5$ , 39.2, 39.8, 55.5, 112.8, 125.8, 127.3, 128.8, 129.5, 135.9, 137.6, 159.9, 160.8, 192.5; HRMS (TOF ES<sup>+</sup>):  $m/z$  calcd for C<sub>19</sub>H<sub>21</sub>N<sub>2</sub>O<sub>2</sub>Se [(M+H<sup>+</sup>)], 389.0763; found, 389.0768.

2-(Phenylselanyl)-2-(tetrahydropyrimidin-2(1*H*)-ylidene)-1-(*p*-tolyl)ethanone (**4n**)

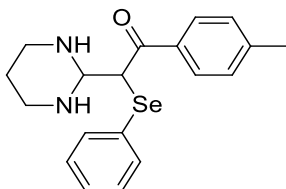

White solid, yield 94%; mp 157–159 °C; IR (KBr): 3363, 3325, 1582, 1341, 1207, 742  $\text{cm}^{-1}$ ;  $^1\text{H}$  NMR (500 MHz,  $\text{CDCl}_3$ ):  $\delta$  = 1.94–1.97 (m, 2H,  $\text{CH}_2$ ), 2.31 (s, 3H,  $\text{ArCH}_3$ ), 3.34–3.47 (m, 4H,  $\text{NCH}_2$ ), 6.56 (br, 1H, NH), 7.01–7.30 (m, 9H, ArH), 12.17 (br, 1H, NH);  $^{13}\text{C}$  NMR (125 MHz,  $\text{CDCl}_3$ ):  $\delta$  = 20.5, 21.8, 39.0, 39.7, 78.1, 125.8, 126.9, 127.3, 128.3, 129.5, 135.9, 138.0, 142.2, 160.7, 193.2; HRMS (TOF  $\text{ES}^+$ ):  $m/z$  calcd for  $\text{C}_{19}\text{H}_{21}\text{N}_2\text{OSe}$  [( $\text{M}+\text{H}^+$ )], 373.0814; found, 373.0817.

1-(4-Fluorophenyl)-2-(phenylselanyl)-2-(tetrahydropyrimidin-2(1*H*)-ylidene)ethanone  
**(4o)**

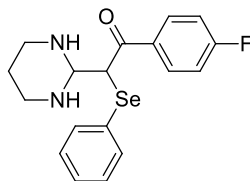

White solid, yield 90%; mp 139–140 °C; IR (KBr): 3322, 1582, 1346, 1210, 740  $\text{cm}^{-1}$ ;  $^1\text{H}$  NMR (500 MHz,  $\text{CDCl}_3$ ):  $\delta$  = 1.93–1.98 (m, 2H,  $\text{CH}_2$ ), 3.40–3.47 (m, 4H,  $\text{NCH}_2$ ), 6.59 (br, 1H, NH), 6.85–7.30 (m, 9H, ArH), 12.07 (br, 1H, NH);  $^{13}\text{C}$  NMR (125 MHz,  $\text{CDCl}_3$ ):  $\delta$  = 20.4, 39.6, 40.9, 78.5, 114.4 (d,  $J$  = 21.3 Hz), 125.9, 127.2, 128.9, 129.6, 135.6, 141.1, 160.7, 163.8, 191.8; HRMS (TOF  $\text{ES}^+$ ):  $m/z$  calcd for  $\text{C}_{18}\text{H}_{18}\text{FN}_2\text{OSe}$  [( $\text{M}+\text{H}^+$ )], 377.0563; found, 377.0565.

1-(4-Chlorophenyl)-2-(phenylselanyl)-2-(tetrahydropyrimidin-2(1*H*)-ylidene)ethanone  
**(4p)**

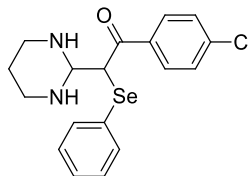

White solid, yield 86%; mp 176–177 °C; IR (KBr): 3319, 3057, 1581, 1345, 1205, 740  $\text{cm}^{-1}$ ;  $^1\text{H}$  NMR (500 MHz,  $\text{CDCl}_3$ ):  $\delta$  = 1.91–1.94 (m, 2H,  $\text{CH}_2$ ), 3.36–3.41 (m, 4H,  $\text{NCH}_2$ ), 6.58 (br, 1H, NH), 7.12–7.25 (m, 9H, ArH), 11.98 (br, 1H, NH);  $^{13}\text{C}$  NMR (125 MHz,  $\text{CDCl}_3$ ):  $\delta$  = 20.4, 39.4, 39.4, 78.3, 126.0, 127.2, 127.8, 128.4, 129.6, 133.9, 135.5, 143.4, 160.6, 191.6; HRMS (TOF  $\text{ES}^+$ ):  $m/z$  calcd for  $\text{C}_{18}\text{H}_{18}\text{ClN}_2\text{OSe}$  [( $\text{M}+\text{H}^+$ )], 393.0265; found, 393.0267.

1-(2-Chlorophenyl)-2-(imidazolidin-2-ylidene)-2-(phenylselanyl)ethanone **(4q)**

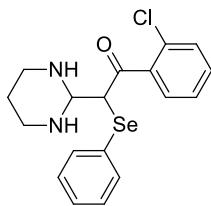

White solid, yield 83%; mp 151–153 °C; IR (KBr): 3350, 1589, 1350, 1211, 747  $\text{cm}^{-1}$ ;  $^1\text{H}$  NMR (500 MHz,  $\text{CDCl}_3$ ):  $\delta$  = 1.89–1.93 (m, 2H,  $\text{CH}_2$ ), 3.28–3.32 (m, 2H,  $\text{NCH}_2$ ), 3.41–3.45 (m, 2H,  $\text{NCH}_2$ ), 6.49 (br, 1H, NH), 6.99–7.24 (m, 9H, ArH), 11.78 (br, 1H, NH);  $^{13}\text{C}$  NMR (125 MHz,  $\text{CDCl}_3$ ):  $\delta$  = 20.4, 39.0, 39.6, 79.8, 125.9, 126.4, 127.7, 128.7, 129.4, 130.5, 134.9, 144.0, 160.2, 190.1; HRMS (TOF  $\text{ES}^+$ ):  $m/z$  calcd for  $\text{C}_{18}\text{H}_{17}\text{ClN}_2\text{NaOSe}$  [( $\text{M}+\text{Na}^+$ )], 415.0087, found, 415.0083.

2-(nitro(phenylthio)methylene)hexahydropyrimidine (**4r**)

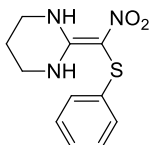

White solid, yield 90%; mp 152.5–153 °C; IR (KBr): 3284, 1585, 1356, 1200, 1127, 738  $\text{cm}^{-1}$ ;  $^1\text{H}$  NMR (500 MHz,  $\text{CDCl}_3$ ):  $\delta$  = 1.93–1.98 (m, 2H,  $\text{CH}_2$ ), 3.42–3.47 (m, 4H,  $\text{NCH}_2$ ), 7.11–7.15 (m, 3H, ArH), 7.22–7.26 (m, 2H, ArH);  $^{13}\text{C}$  NMR (125 MHz,  $\text{CDCl}_3$ ):  $\delta$  = 19.0, 39.0, 39.0, 100.8, 125.5, 125.9, 129.1, 135.7, 155.7; HRMS (TOF  $\text{ES}^+$ ):  $m/z$  calcd for  $\text{C}_{11}\text{H}_{13}\text{N}_3\text{NaO}_2\text{S}$  [( $\text{M}+\text{Na}^+$ )], 274.0621; found, 274.0619.

2-(1,3-Diazepan-2-ylidene)-1-phenyl-2-(phenylthio)ethanone (**5a**)

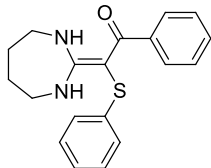

White solid, yield 92%; mp 177–178 °C; IR (KBr): 3363, 1594, 1343, 1202, 742  $\text{cm}^{-1}$ ;  $^1\text{H}$  NMR (500 MHz,  $\text{CDCl}_3$ ):  $\delta$  = 1.75–1.81 (m, 4H,  $\text{CH}_2\text{CH}_2$ ), 3.20–3.23 (m, 2H,  $\text{NCH}_2$ ), 3.45–3.48 (m, 2H,  $\text{NCH}_2$ ), 6.55 (br, 1H, NH), 7.08–7.31 (m, 10H, ArH), 12.14 (br, 1H, NH);  $^{13}\text{C}$  NMR (125 MHz,  $\text{CDCl}_3$ ):  $\delta$  = 28.0, 28.3, 45.5, 46.3, 81.6, 124.8, 125.1, 126.9, 127.6, 128.7, 129.3, 140.9, 143.9, 170.7, 194.2; HRMS (TOF  $\text{ES}^+$ ):  $m/z$  calcd for  $\text{C}_{19}\text{H}_{21}\text{N}_2\text{OS}$  [( $\text{M}+\text{H}^+$ )], 325.1369; found, 325.1368.

2-(1,3-Diazepan-2-ylidene)-2-(phenylselanyl)-1-(*p*-tolyl)ethanone (**5b**)

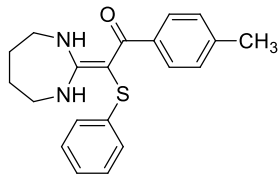

White solid, yield 93%; mp 157–158 °C; IR (KBr): 3317, 2932, 1605, 1349, 1200, 741  $\text{cm}^{-1}$ ;  $^1\text{H}$  NMR (500 MHz,  $\text{CDCl}_3$ ):  $\delta$  = 1.73–1.80 (m, 4H,  $\text{CH}_2\text{CH}_2$ ), 2.29 (s, 3H,  $\text{ArCH}_3$ ), 3.18–3.20 (m, 2H,  $\text{NCH}_2$ ), 3.43–3.47 (m, 2H,  $\text{NCH}_2$ ), 6.54 (br, 1H, NH), 7.01 (d,  $J$  = 7.7 Hz, 2H), 7.00–7.13 (m, 3H, ArH), 7.24–7.27 (m, 3H, ArH), 12.20 (br, 1H, NH);  $^{13}\text{C}$  NMR (125 MHz,  $\text{CDCl}_3$ ):  $\delta$  = 21.8, 28.1, 28.3, 45.5, 46.3, 81.4, 124.8, 125.1, 127.1, 128.3, 128.3, 129.3, 138.6, 141.0, 170.8, 194.2; HRMS (TOF  $\text{ES}^+$ ):  $m/z$  calcd for  $\text{C}_{20}\text{H}_{23}\text{N}_2\text{OS}$  [( $\text{M}+\text{H}^+$ )], 339.1526, found, 339.1518.

2-(1,3-Diazepan-2-ylidene)-1-(4-fluorophenyl)-2-(phenylthio)ethanone (**5c**)

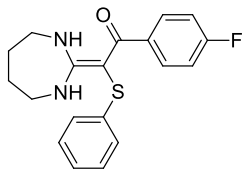

White solid, yield 90%; mp 124–125 °C; IR (KBr): 3331, 3060, 1591, 1348, 1207, 847, 740  $\text{cm}^{-1}$ ;  $^1\text{H}$  NMR (500 MHz,  $\text{CDCl}_3$ ):  $\delta$  = 1.76–1.84 (m, 4H,  $\text{CH}_2\text{CH}_2$ ), 3.22–3.26 (m, 2H,  $\text{NCH}_2$ ), 3.46–3.50 (m, 2H,  $\text{NCH}_2$ ), 6.59 (br, 1H, NH), 6.85–6.91 (m, 2H, ArH), 7.09–7.14 (m, 3H, ArH), 7.25–7.29 (m, ArH, 2H), 7.33–7.36 (m, ArH, 2H), 12.12 (br, 1H, NH);  $^{13}\text{C}$  NMR (125 MHz,  $\text{CDCl}_3$ ):  $\delta$  = 28.0, 28.2, 45.5, 46.3, 81.5, 114.4 (d,  $J$  = 21.3 Hz), 124.7, 125.2, 129.2, 129.4, 139.9, 140.6, 163.0 (d,  $J$  = 245.0 Hz), 170.7, 192.80; HRMS (TOF  $\text{ES}^+$ ):  $m/z$  calcd for  $\text{C}_{19}\text{H}_{19}\text{FN}_2\text{NaOS}$  [( $\text{M}+\text{Na}^+$ )], 365.1094; found, 365.1087.

1-(4-Chlorophenyl)-2-(1,3-diazepan-2-ylidene)-2-(phenylthio)ethanone (**5d**)

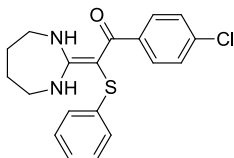

White solid, yield 87%; mp 156–157 °C; IR (KBr): 3325, 3053, 1594, 1349, 1202, 833, 744  $\text{cm}^{-1}$ ;  $^1\text{H}$  NMR (500 MHz,  $\text{CDCl}_3$ ):  $\delta$  = 1.68–1.81 (m, 4H,  $\text{CH}_2\text{CH}_2$ ), 3.20–3.3.24 (m, 2H,  $\text{NCH}_2$ ), 3.67–3.70 (m, 2H,  $\text{NCH}_2$ ), 6.56 (br, 1H, NH), 7.05–7.25 (m, 9H, ArH), 12.06 (br, 1H, NH);  $^{13}\text{C}$  NMR (125 MHz,  $\text{CDCl}_3$ ):  $\delta$  = 27.9, 28.2, 45.5, 46.3, 81.5, 124.7, 125.3,



127.8, 128.5, 129.4, 134.4, 140.5, 142.2, 170.6, 192.7; HRMS (TOF ES<sup>+</sup>): m/z calcd for C<sub>19</sub>H<sub>20</sub>ClN<sub>2</sub>OS [(M+H<sup>+</sup>)], 359.0979; found, 359.0975.

2-(1,3-Diazepan-2-ylidene)-2-((4-methoxyphenyl)thio)-1-phenylethanone (**5e**)

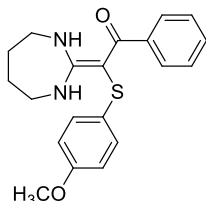

White solid, yield 96%; mp 171–172 °C; IR (KBr): 3316, 2930, 1600, 1342, 1238, 816 cm<sup>-1</sup>; <sup>1</sup>H NMR (500 MHz, CDCl<sub>3</sub>): δ = 1.75–1.79 (m, 4H, CH<sub>2</sub>CH<sub>2</sub>), 3.19–3.23 (m, 2H, NCH<sub>2</sub>), 3.42–3.47 (m, 2H, NCH<sub>2</sub>), 3.76 (s, 3H, OCH<sub>3</sub>), 6.64 (br, 1H, NH), 6.80 (d, *J* = 8.5 Hz), 6.98 (d, *J* = 8.5 Hz), 7.18–7.26 (m, 3H, ArH), 7.28–7.32 (m, 2H, ArH), 12.11 (br, 1H, NH); <sup>13</sup>C NMR (125 MHz, CDCl<sub>3</sub>): δ = 28.0, 28.3, 45.5, 46.3, 55.8, 82.8, 115.1, 126.3, 126.9, 127.6, 128.6, 131.5, 144.0, 157.9, 170.8, 194.1; HRMS (TOF ES<sup>+</sup>): m/z calcd for C<sub>20</sub>H<sub>23</sub>N<sub>2</sub>O<sub>2</sub>S [(M+H<sup>+</sup>)], 355.1475; found, 355.147.

2-(1,3-Diazepan-2-ylidene)-1-phenyl-2-(*p*-tolylthio)ethanone (**5f**)

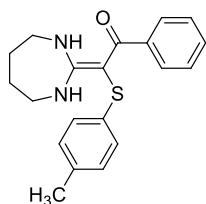

White solid, yield 95%; mp 175–177 °C; IR (KBr): 3334, 3046, 1600, 1345, 1200, 800 cm<sup>-1</sup>; <sup>1</sup>H NMR (500 MHz, CDCl<sub>3</sub>): δ = 1.75–1.81 (m, 4H, CH<sub>2</sub>CH<sub>2</sub>), 2.30 (s, 3H, ArCH<sub>3</sub>), 3.19–3.23 (m, 2H, NCH<sub>2</sub>), 3.42–3.48 (m, 2H, NCH<sub>2</sub>), 6.58 (br, 1H, NH), 6.98 (d, *J* = 8.2 Hz, 2H, ArH), 7.06 (d, *J* = 8.2 Hz, 2H, ArH), 7.17–7.32 (m, 5H, ArH), 12.14 (br, 1H, NH); <sup>13</sup>C NMR (125 MHz, CDCl<sub>3</sub>): δ = 21.3, 28.0, 28.3, 45.5, 46.3, 81.9, 124.8, 126.9, 127.6, 128.6, 130.1, 134.8, 137.2, 143.9, 170.7, 194.1; HRMS (TOF ES<sup>+</sup>): m/z calcd for C<sub>20</sub>H<sub>23</sub>N<sub>2</sub>OS [(M+H<sup>+</sup>)], 339.1526; found, 339.1527.

2-((4-Chlorophenyl)thio)-2-(1,3-diazepan-2-ylidene)-1-phenylethanone (**5g**)

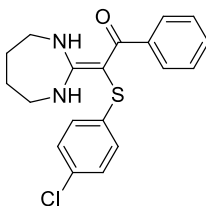

White solid, yield 91%; mp 200–202 °C; IR (KBr): 3318, 1603, 1346, 1199, 803 cm<sup>-1</sup>; <sup>1</sup>H NMR (500 MHz, CDCl<sub>3</sub>): δ = 1.74–1.82 (m, 4H, CH<sub>2</sub>CH<sub>2</sub>), 3.21–3.23 (m, 2H, NCH<sub>2</sub>), 3.45–3.48 (m, 2H, NCH<sub>2</sub>), 6.48 (br, 1H, NH), 7.00 (d, *J* = 8.6 Hz, 2H, ArH), 7.17–7.28 (m, 7H, ArH), 12.1 (br, 1H, NH); <sup>13</sup>C NMR (125 MHz, CDCl<sub>3</sub>): δ = 27.9, 28.2, 45.5, 46.3, 81.2, 126.0, 126.7, 127.7, 128.8, 129.4, 130.8, 139.5, 143.7, 170.5, 194.2; HRMS (TOF ES<sup>+</sup>): *m/z* calcd for C<sub>19</sub>H<sub>20</sub>ClN<sub>2</sub>OS [(M+H<sup>+</sup>)], 359.0979; found, 359.0982.

2-(1,3-Diazepan-2-ylidene)-2-((3,5-dichlorophenyl)thio)-1-phenylethanone (**5h**)

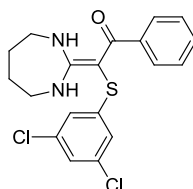

White solid, yield 83%; mp 139–141 °C; IR (KBr): 3308, 1561, 1348, 1206, 791 cm<sup>-1</sup>; <sup>1</sup>H NMR (500 MHz, CDCl<sub>3</sub>): δ = 1.79–1.84 (m, 4H, CH<sub>2</sub>CH<sub>2</sub>), 3.24–3.28 (m, 2H, NCH<sub>2</sub>), 3.47–3.50 (m, 2H, NCH<sub>2</sub>), 6.38 (br, 1H, NH), 6.91 (s, 2H, ArH), 7.04 (s, 1H, ArH), 7.20–7.27 (m, 5H, ArH), 12.07 (br, 1H, NH); <sup>13</sup>C NMR (125 MHz, CDCl<sub>3</sub>): δ = 27.8, 28.1, 45.4, 46.3, 80.0, 122.7, 125.3, 126.6, 127.8, 128.9, 135.8, 143.5, 145.1, 170.1, 194.3; HRMS (TOF ES<sup>+</sup>): *m/z* calcd for C<sub>19</sub>H<sub>19</sub>Cl<sub>2</sub>N<sub>2</sub>OS [(M+H<sup>+</sup>)], 393.0590; found, 393.0596.

2-(1,3-Diazepan-2-ylidene)-2-((4-fluorophenyl)thio)-1-phenylethanone (**5i**)

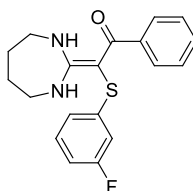

White solid, yield 88%, mp 188–189 °C; IR (KBr): 3255, 1556, 1354, 1210, 776 cm<sup>-1</sup>; <sup>1</sup>H NMR (500 MHz, CDCl<sub>3</sub>): δ = 1.75–1.83 (m, 4H, CH<sub>2</sub>CH<sub>2</sub>), 3.19–3.23 (m, 2H, NCH<sub>2</sub>), 3.42–3.47 (m, 2H, NCH<sub>2</sub>), 6.48 (br, 1H, NH), 6.74–6.86 (m, 3H, ArH), 7.15–7.83 (m, 6H, ArH), 12.09 (br, 1H, NH); <sup>13</sup>C NMR (125 MHz, CDCl<sub>3</sub>): δ = 27.9, 28.2, 45.5, 46.3, 111.5 (d, *J* = 23.8 Hz), 112.0 (d, *J* = 21.3 Hz), 120.4, 126.8, 127.3, 127.7, 128.7, 128.8, 130.6, 143.7, 163.8 (d, *J* = 246.3 Hz), 170.4, 194.2; HRMS (TOF ES<sup>+</sup>): *m/z* calcd for C<sub>19</sub>H<sub>20</sub>FN<sub>2</sub>OS [(M+H<sup>+</sup>)], 343.1275; found, 343.1271.

2-(1,3-Diazepan-2-ylidene)-1-phenyl-2-(phenylselanyl)ethanone (**5j**)

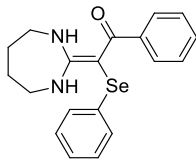

White solid, yield 90%; mp 154–156 °C; IR (KBr): 3347, 1593, 1342, 1202, 737  $\text{cm}^{-1}$ ;  $^1\text{H}$  NMR (500 MHz,  $\text{CDCl}_3$ ):  $\delta$  = 1.72–1.77 (m, 4H,  $\text{CH}_2\text{CH}_2$ ), 3.15–3.19 (m, 2H,  $\text{CH}_2$ ), 3.42–3.46 (m, 2H,  $\text{CH}_2$ ), 6.53 (br, 1H, NH), 7.12–7.28 (m, 10H, ArH), 12.17 (br, 1H, NH);  $^{13}\text{C}$  NMR (125 MHz,  $\text{CDCl}_3$ ):  $\delta$  = 28.2, 28.2, 45.7, 46.4, 81.6, 125.9, 126.8, 127.5, 127.6, 128.5, 129.5, 135.7, 145.0, 170.7, 194.4; HRMS (TOF  $\text{ES}^+$ ):  $m/z$  calcd for  $\text{C}_{19}\text{H}_{21}\text{N}_2\text{OSe}$  [(M+ $\text{H}^+$ )], 373.0814; found, 373.0816.

2-(1,3-Diazepan-2-ylidene)-2-(phenylselanyl)-1-(*p*-tolyl)ethanone (**5k**)

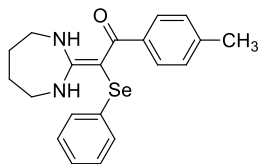

White solid, yield 93%, mp 125–127 °C; IR (KBr): 3308, 1603, 1346, 1204, 818, 736  $\text{cm}^{-1}$ ;  $^1\text{H}$  NMR (500 MHz,  $\text{CDCl}_3$ ):  $\delta$  = 1.72–1.77 (m, 4H,  $\text{CH}_2\text{CH}_2$ ), 3.15–3.18 (m, 2H,  $\text{NCH}_2$ ), 3.41–3.45 (m, 2H,  $\text{NCH}_2$ ), 6.50 (br, 1H, NH), 7.00 (d,  $J$  = 7.4 Hz, 2H, ArH), 7.13–7.26 (m, 7H, ArH), 12.19 (br, 1H, NH);  $^{13}\text{C}$  NMR (125 MHz,  $\text{CDCl}_3$ ):  $\delta$  = 21.8, 28.1, 28.2, 45.7, 46.5, 81.5, 125.9, 127.0, 127.4, 128.3, 129.5, 135.8, 138.5, 142.1, 170.8, 194.5; HRMS (TOF  $\text{ES}^+$ ):  $m/z$  calcd for  $\text{C}_{20}\text{H}_{23}\text{N}_2\text{OSe}$  [(M+ $\text{H}^+$ )], 387.0970; found, 387.0970.

2-(1,3-Diazepan-2-ylidene)-1-(4-fluorophenyl)-2-(phenylselanyl)ethanone (**5l**)

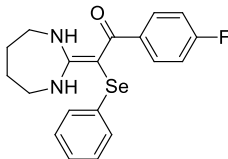

White solid, yield 86%; mp 137–138 °C; IR (KBr): 3319, 3053, 1598, 1349, 1207, 841, 737  $\text{cm}^{-1}$ ;  $^1\text{H}$  NMR (500 MHz,  $\text{CDCl}_3$ ):  $\delta$  = 1.73–1.80 (m, 4H,  $\text{CH}_2\text{CH}_2$ ), 2.17 (s, 3H, ArH), 3.18–3.22 (m, 2H,  $\text{NCH}_2$ ), 3.43–3.48 (m, 2H,  $\text{NCH}_2$ ), 6.54 (br, 1H, NH), 6.86 (t,  $J$  = 8.5 Hz, 2H, ArH), 7.17–7.30 (m, 7H, ArH), 12.14 (br, 1H, NH);  $^{13}\text{C}$  NMR (125 MHz,  $\text{CDCl}_3$ ):  $\delta$  = 28.0, 28.2, 45.6, 46.5, 81.5, 114.4 (d,  $J$  = 21.3 Hz), 126.0, 127.4, 129.0,

129.6, 135.5, 141.0, 163.0 (d,  $J = 245.0$  Hz), 170.7, 193.1; HRMS (TOF ES<sup>+</sup>):  $m/z$  calcd for C<sub>19</sub>H<sub>20</sub>FN<sub>2</sub>OSe [(M+H<sup>+</sup>)], 391.0719; found, 391.0718.

1-(4-Chlorophenyl)-2-(1,3-diazepan-2-ylidene)-2-(phenylselanyl)ethanone (**5m**)

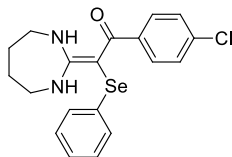

White solid, yield 85%; mp 141–143 °C; IR (KBr): 3315, 3064, 1590, 1346, 1203, 739 cm<sup>-1</sup>; <sup>1</sup>H NMR (500 MHz, CDCl<sub>3</sub>):  $\delta = 1.77$ – $1.83$  (m, 4H, CH<sub>2</sub>CH<sub>2</sub>), 3.22–3.25 (m, 2H, NCH<sub>2</sub>), 3.46–3.50 (m, 2H, NCH<sub>2</sub>), 6.58 (br, 1H, NH), 7.14–7.33 (m, 9H, ArH), 12.15 (br, 1H, NH); <sup>13</sup>C NMR (125 MHz, CDCl<sub>3</sub>):  $\delta = 28.0$ , 28.0, 45.6, 46.4, 81.5, 126.1, 127.4, 127.8, 128.4, 129.6, 134.3, 135.4, 143.4, 170.6, 192.9; HRMS (TOF ES<sup>+</sup>):  $m/z$  calcd for C<sub>19</sub>H<sub>20</sub>ClN<sub>2</sub>OSe [(M+H<sup>+</sup>)], 407.0424; found, 407.0416.

## Crystal X-ray structure and packing diagrams of compound **3g**<sup>2</sup>

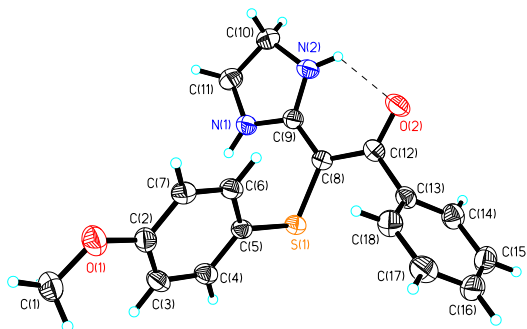

**Fig. A** ORTEP view of the molecular structure of **3g**, thermal ellipsoids are drawn at 30% probability.

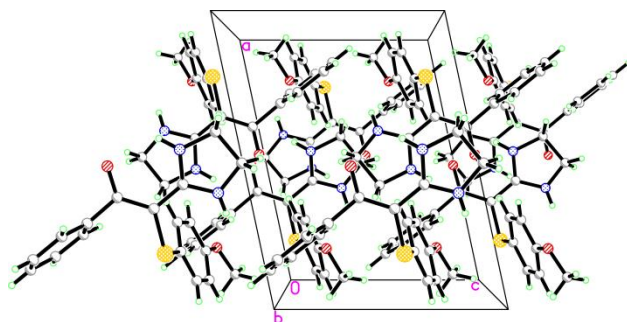

**Fig. B** Packing in the crystal structure of **3g**, viewed along the *b* axis.

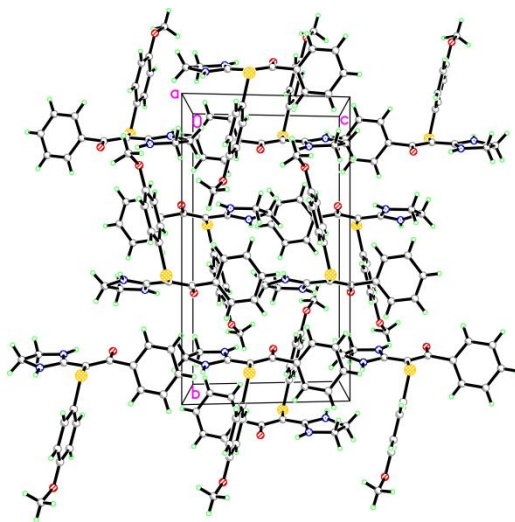

**Fig. C** Packing in the crystal structure of **3g**, viewed along the *a* axis.

**Table S1.** Crystal data and structure refinement for **3g**

|                                   |                                                                 |                        |
|-----------------------------------|-----------------------------------------------------------------|------------------------|
| Empirical formula                 | C <sub>18</sub> H <sub>18</sub> N <sub>2</sub> O <sub>2</sub> S |                        |
| Formula weight                    | 326.40                                                          |                        |
| Temperature                       | 298(2) K                                                        |                        |
| Wavelength                        | 0.71073 Å                                                       |                        |
| Crystal system, space group       | Monoclinic, P2(1)/c                                             |                        |
| Unit cell dimensions              | a = 11.5631(18) Å                                               | alpha = 90 deg.        |
|                                   | b = 15.924(3) Å                                                 | beta = 102.048(2) deg. |
|                                   | c = 8.8842(14) Å                                                | gamma = 90 deg.        |
| Volume                            | 1599.8(4) Å <sup>3</sup>                                        |                        |
| Z, Calculated density             | 4, 1.355 Mg/m <sup>3</sup>                                      |                        |
| Absorption coefficient            | 0.214 mm <sup>-1</sup>                                          |                        |
| F(000)                            | 688                                                             |                        |
| Crystal size                      | 0.23 x 0.16 x 0.14 mm                                           |                        |
| Theta range for data collection   | 1.80 to 28.19 deg.                                              |                        |
| Limiting indices                  | -15<=h<=15, -20<=k<=20, -8<=l<=11                               |                        |
| Reflections collected / unique    | 10822 / 3761 [R(int) = 0.0468]                                  |                        |
| Completeness to theta = 28.19     | 95.5 %                                                          |                        |
| Absorption correction             | Semi-empirical from equivalents                                 |                        |
| Max. and min. transmission        | 0.9707 and 0.9525                                               |                        |
| Refinement method                 | Full-matrix least-squares on F <sup>2</sup>                     |                        |
| Data / restraints / parameters    | 3761 / 0 / 209                                                  |                        |
| Goodness-of-fit on F <sup>2</sup> | 0.926                                                           |                        |
| Final R indices [I>2sigma(I)]     | R1 = 0.0476, wR2 = 0.1024                                       |                        |
| R indices (all data)              | R1 = 0.0963, wR2 = 0.1267                                       |                        |
| Largest diff. peak and hole       | 0.178 and -0.268 e.Å <sup>-3</sup>                              |                        |

**Table S2.** Geometric parameters of compound **3g**

| <i>Bond lengths (Å)</i> |          |              |          |
|-------------------------|----------|--------------|----------|
| N(1)-C(9)               | 1.314(3) | C(6)-H(6)    | 0.9300   |
| N(1)-C(11)              | 1.457(3) | C(7)-H(7)    | 0.9300   |
| N(1)-H(1)               | 0.8600   | C(8)-C(12)   | 1.409(3) |
| N(2)-C(9)               | 1.334(3) | C(8)-C(9)    | 1.413(3) |
| N(2)-C(10)              | 1.459(3) | C(10)-C(11)  | 1.509(3) |
| N(2)-H(2)               | 0.8600   | C(10)-H(10A) | 0.9700   |
| O(1)-C(2)               | 1.378(3) | C(10)-H(10B) | 0.9700   |
| O(1)-C(1)               | 1.417(3) | C(11)-H(11A) | 0.9700   |
| O(2)-C(12)              | 1.254(3) | C(11)-H(11B) | 0.9700   |
| S(1)-C(8)               | 1.755(2) | C(12)-C(13)  | 1.509(3) |

|                        |            |                     |            |
|------------------------|------------|---------------------|------------|
| S(1)-C(5)              | 1.778(2)   | C(13)-C(14)         | 1.379(3)   |
| C(1)-H(1A)             | 0.9600     | C(13)-C(18)         | 1.386(3)   |
| C(1)-H(1B)             | 0.9600     | C(14)-C(15)         | 1.380(3)   |
| C(1)-H(1C)             | 0.9600     | C(14)-H(14)         | 0.9300     |
| C(2)-C(7)              | 1.381(3)   | C(15)-C(16)         | 1.366(3)   |
| C(2)-C(3)              | 1.387(3)   | C(15)-H(15)         | 0.9300     |
| C(3)-C(4)              | 1.383(3)   | C(16)-C(17)         | 1.379(4)   |
| C(3)-H(3)              | 0.9300     | C(16)-H(16)         | 0.9300     |
| C(4)-C(5)              | 1.384(3)   | C(17)-C(18)         | 1.381(3)   |
| C(4)-H(4)              | 0.9300     | C(17)-H(17)         | 0.9300     |
| C(5)-C(6)              | 1.393(3)   | C(18)-H(18)         | 0.9300     |
| C(6)-C(7)              | 1.368(3)   |                     |            |
| <i>Bond angles (°)</i> |            |                     |            |
| C(9)-N(1)-C(11)        | 111.79(19) | N(2)-C(9)-C(8)      | 126.3(2)   |
| C(9)-N(1)-H(1)         | 124.1      | N(1)-C(9)-C(8)      | 124.6(2)   |
| C(11)-N(1)-H(1)        | 124.1      | N(2)-C(10)-C(11)    | 103.20(19) |
| C(9)-N(2)-C(10)        | 111.6(2)   | N(2)-C(10)-H(10A)   | 111.1      |
| C(9)-N(2)-H(2)         | 124.2      | C(11)-C(10)-H(10A)  | 111.1      |
| C(10)-N(2)-H(2)        | 124.2      | N(2)-C(10)-H(10B)   | 111.1      |
| C(2)-O(1)-C(1)         | 117.4(2)   | C(11)-C(10)-H(10B)  | 111.1      |
| C(8)-S(1)-C(5)         | 104.70(10) | H(10A)-C(10)-H(10B) | 109.1      |
| O(1)-C(1)-H(1A)        | 109.5      | N(1)-C(11)-C(10)    | 102.5(2)   |
| O(1)-C(1)-H(1B)        | 109.5      | N(1)-C(11)-H(11A)   | 111.3      |
| H(1A)-C(1)-H(1B)       | 109.5      | C(10)-C(11)-H(11A)  | 111.3      |
| O(1)-C(1)-H(1C)        | 109.5      | N(1)-C(11)-H(11B)   | 111.3      |
| H(1A)-C(1)-H(1C)       | 109.5      | C(10)-C(11)-H(11B)  | 111.3      |
| H(1B)-C(1)-H(1C)       | 109.5      | H(11A)-C(11)-H(11B) | 109.2      |
| O(1)-C(2)-C(7)         | 115.6(2)   | O(2)-C(12)-C(8)     | 123.6(2)   |
| O(1)-C(2)-C(3)         | 124.8(2)   | O(2)-C(12)-C(13)    | 117.0(2)   |
| C(7)-C(2)-C(3)         | 119.5(2)   | C(8)-C(12)-C(13)    | 119.33(19) |
| C(4)-C(3)-C(2)         | 119.5(2)   | C(14)-C(13)-C(18)   | 118.1(2)   |
| C(4)-C(3)-H(3)         | 120.3      | C(14)-C(13)-C(12)   | 120.0(2)   |
| C(2)-C(3)-H(3)         | 120.3      | C(18)-C(13)-C(12)   | 121.9(2)   |
| C(3)-C(4)-C(5)         | 121.5(2)   | C(13)-C(14)-C(15)   | 121.3(2)   |
| C(3)-C(4)-H(4)         | 119.2      | C(13)-C(14)-H(14)   | 119.3      |
| C(5)-C(4)-H(4)         | 119.2      | C(15)-C(14)-H(14)   | 119.3      |
| C(4)-C(5)-C(6)         | 117.9(2)   | C(16)-C(15)-C(14)   | 120.0(2)   |
| C(4)-C(5)-S(1)         | 118.36(17) | C(16)-C(15)-H(15)   | 120.0      |
| C(6)-C(5)-S(1)         | 123.73(17) | C(14)-C(15)-H(15)   | 120.0      |

|                 |            |                   |          |
|-----------------|------------|-------------------|----------|
| C(7)-C(6)-C(5)  | 121.1(2)   | C(15)-C(16)-C(17) | 119.8(2) |
| C(7)-C(6)-H(6)  | 119.5      | C(15)-C(16)-H(16) | 120.1    |
| C(5)-C(6)-H(6)  | 119.5      | C(17)-C(16)-H(16) | 120.1    |
| C(6)-C(7)-C(2)  | 120.5(2)   | C(16)-C(17)-C(18) | 120.1(2) |
| C(6)-C(7)-H(7)  | 119.7      | C(16)-C(17)-H(17) | 120.0    |
| C(2)-C(7)-H(7)  | 119.7      | C(18)-C(17)-H(17) | 120.0    |
| C(12)-C(8)-C(9) | 120.69(19) | C(17)-C(18)-C(13) | 120.7(2) |
| C(12)-C(8)-S(1) | 121.79(16) | C(17)-C(18)-H(18) | 119.6    |
| C(9)-C(8)-S(1)  | 117.33(17) | C(13)-C(18)-H(18) | 119.6    |
| N(2)-C(9)-N(1)  | 109.1(2)   |                   |          |

*Torsion angles (°)*

|                      |             |                         |            |
|----------------------|-------------|-------------------------|------------|
| C(1)-O(1)-C(2)-C(7)  | 174.9(2)    | C(12)-C(8)-C(9)-N(1)    | -179.3(2)  |
| C(1)-O(1)-C(2)-C(3)  | -5.1(3)     | S(1)-C(8)-C(9)-N(1)     | 5.6(3)     |
| O(1)-C(2)-C(3)-C(4)  | 179.1(2)    | C(9)-N(2)-C(10)-C(11)   | -9.7(3)    |
| C(7)-C(2)-C(3)-C(4)  | -0.9(3)     | C(9)-N(1)-C(11)-C(10)   | -12.1(3)   |
| C(2)-C(3)-C(4)-C(5)  | -0.3(3)     | N(2)-C(10)-C(11)-N(1)   | 12.3(3)    |
| C(3)-C(4)-C(5)-C(6)  | 1.4(3)      | C(9)-C(8)-C(12)-O(2)    | -3.7(3)    |
| C(3)-C(4)-C(5)-S(1)  | -178.29(17) | S(1)-C(8)-C(12)-O(2)    | 171.19(18) |
| C(8)-S(1)-C(5)-C(4)  | 169.52(17)  | C(9)-C(8)-C(12)-C(13)   | 177.3(2)   |
| C(8)-S(1)-C(5)-C(6)  | -10.1(2)    | S(1)-C(8)-C(12)-C(13)   | -7.8(3)    |
| C(4)-C(5)-C(6)-C(7)  | -1.3(3)     | O(2)-C(12)-C(13)-C(14)  | -64.5(3)   |
| S(1)-C(5)-C(6)-C(7)  | 178.36(17)  | C(8)-C(12)-C(13)-C(14)  | 114.5(2)   |
| C(5)-C(6)-C(7)-C(2)  | 0.1(4)      | O(2)-C(12)-C(13)-C(18)  | 113.4(3)   |
| O(1)-C(2)-C(7)-C(6)  | -179.0(2)   | C(8)-C(12)-C(13)-C(18)  | -67.6(3)   |
| C(3)-C(2)-C(7)-C(6)  | 1.0(4)      | C(18)-C(13)-C(14)-C(15) | 0.5(4)     |
| C(5)-S(1)-C(8)-C(12) | 107.30(19)  | C(12)-C(13)-C(14)-C(15) | 178.5(2)   |
| C(5)-S(1)-C(8)-C(9)  | -77.62(18)  | C(13)-C(14)-C(15)-C(16) | -0.6(4)    |
| C(10)-N(2)-C(9)-N(1) | 2.4(3)      | C(14)-C(15)-C(16)-C(17) | -0.2(4)    |
| C(10)-N(2)-C(9)-C(8) | -176.5(2)   | C(15)-C(16)-C(17)-C(18) | 1.1(4)     |
| C(11)-N(1)-C(9)-N(2) | 6.5(3)      | C(16)-C(17)-C(18)-C(13) | -1.2(4)    |
| C(11)-N(1)-C(9)-C(8) | -174.6(2)   | C(14)-C(13)-C(18)-C(17) | 0.4(4)     |
| C(12)-C(8)-C(9)-N(2) | -0.5(3)     | C(12)-C(13)-C(18)-C(17) | -177.6(2)  |
| S(1)-C(8)-C(9)-N(2)  | -175.64(18) |                         |            |



### Spectra of Target Compounds 3-5

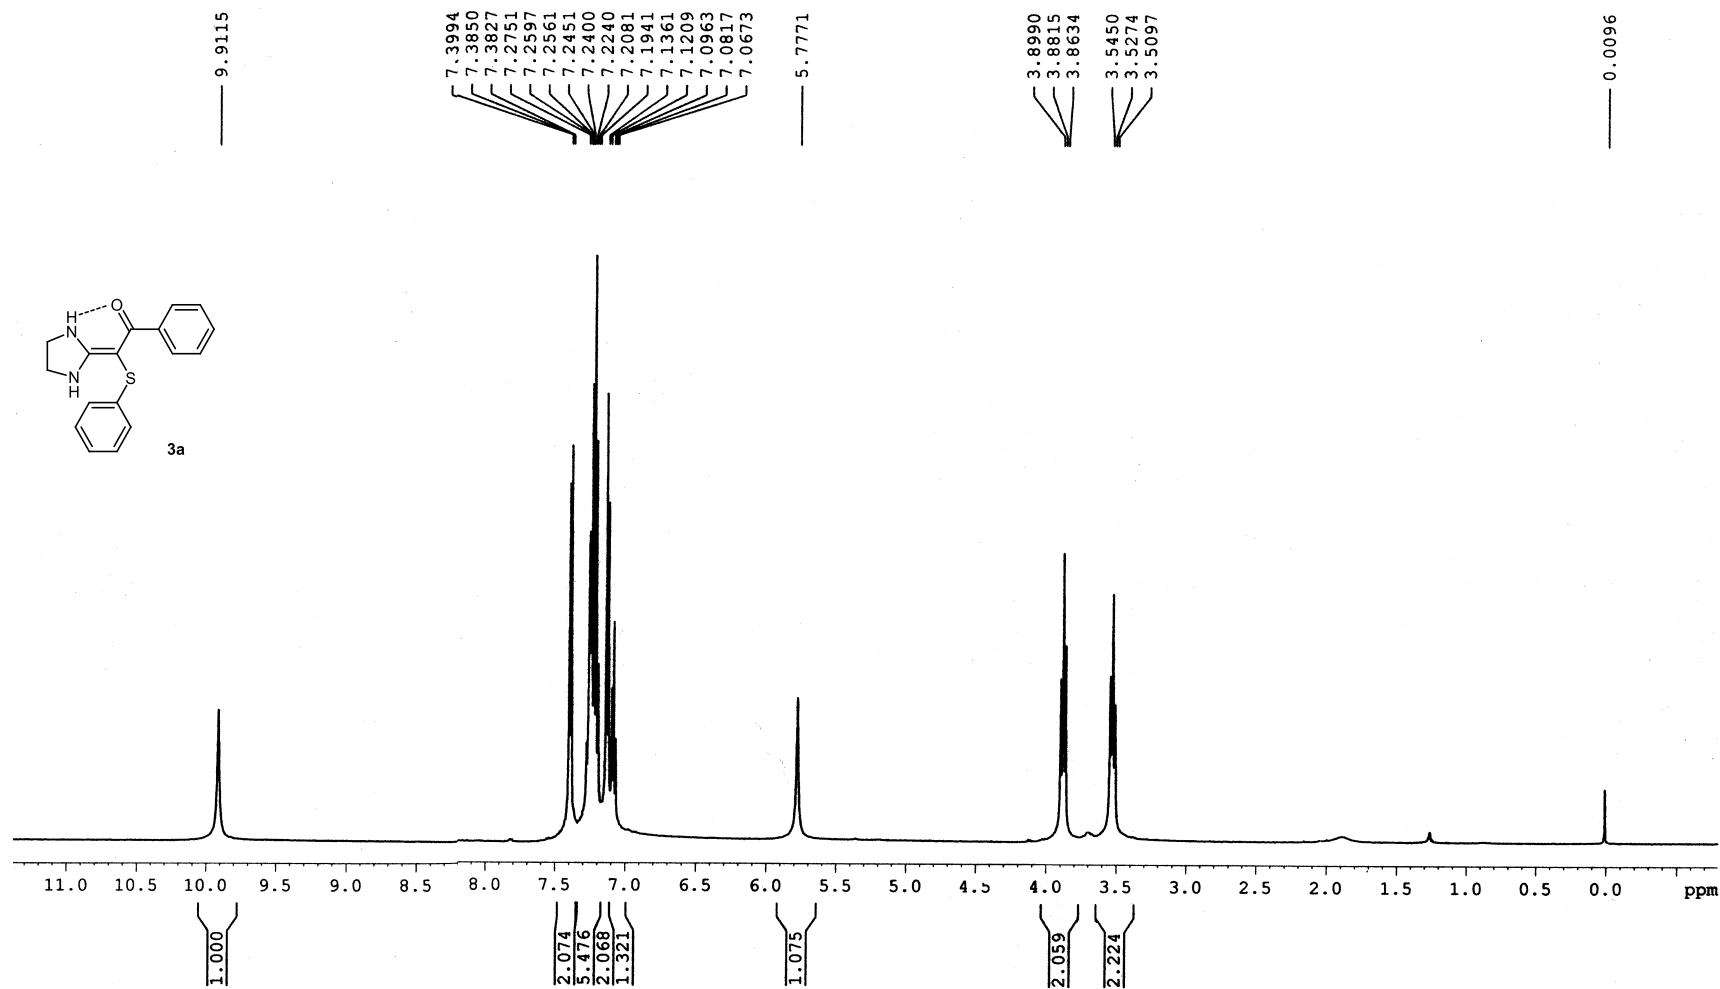

Figure S1  $^1\text{H}$  NMR spectrum (500 MHz,  $\text{CDCl}_3$ ) of compound **3a**

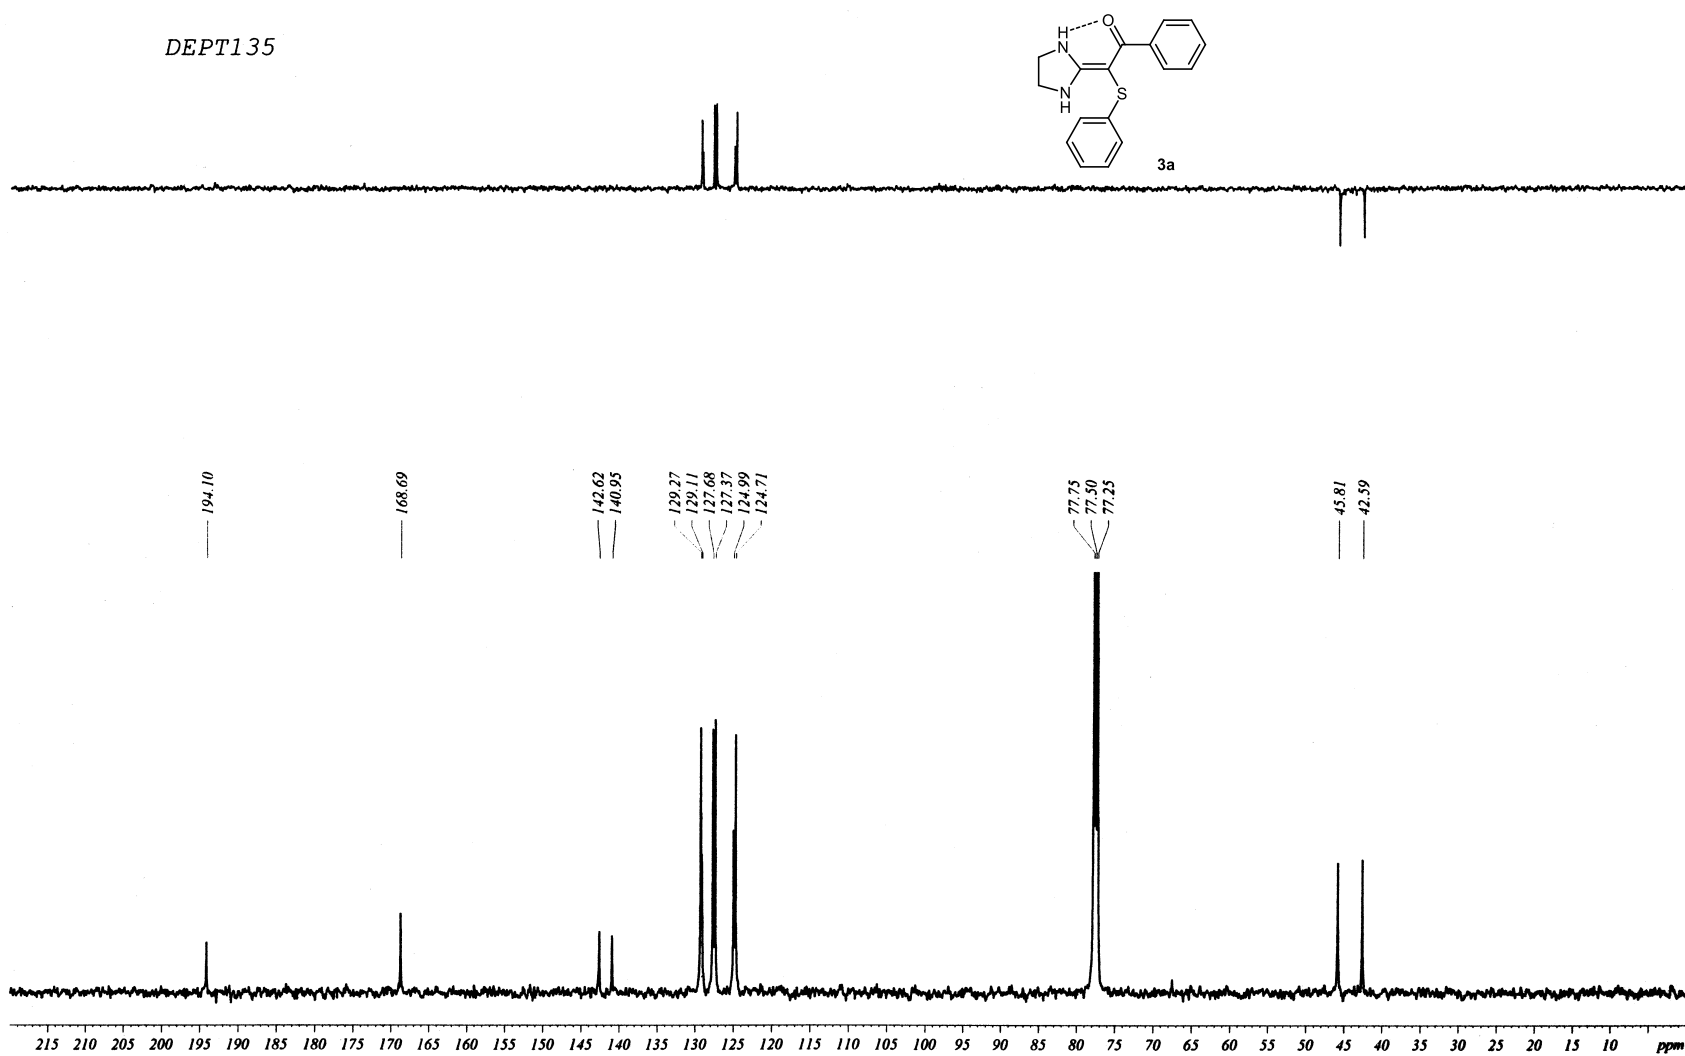

Figure S2  $^{13}\text{C}$  NMR spectrum (125 MHz,  $\text{CDCl}_3$ ) of compound 3a

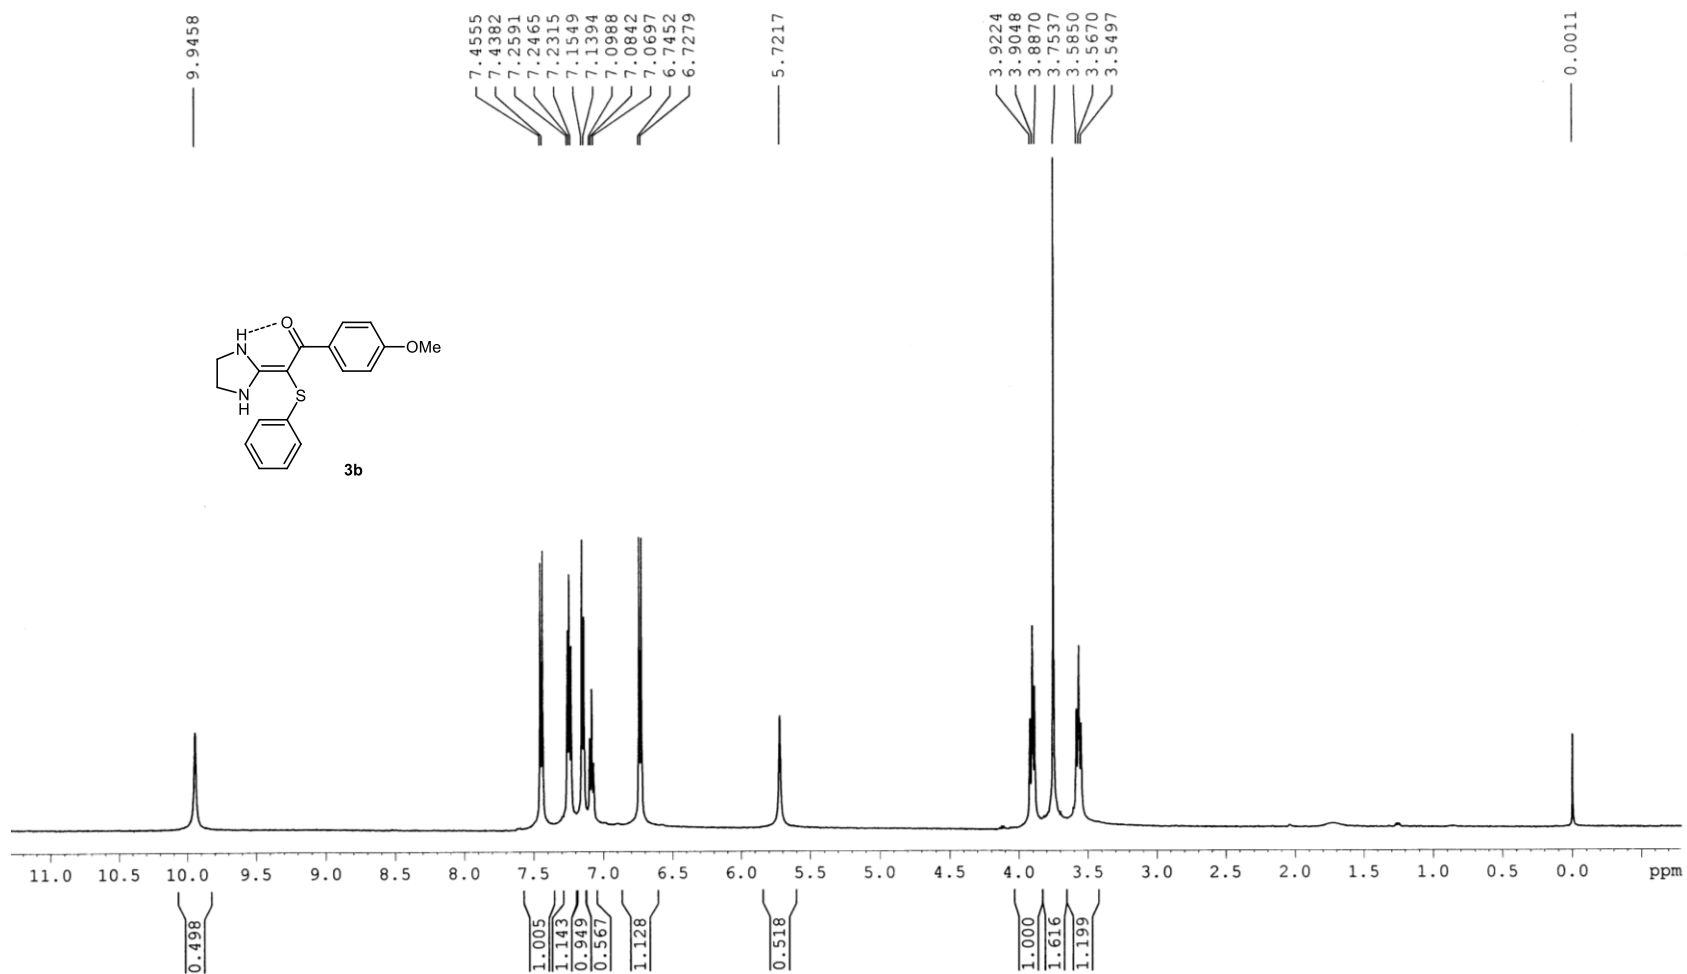

**Figure S3**  $^1\text{H}$  NMR spectrum (500 MHz,  $\text{CDCl}_3$ ) of compound **3b**

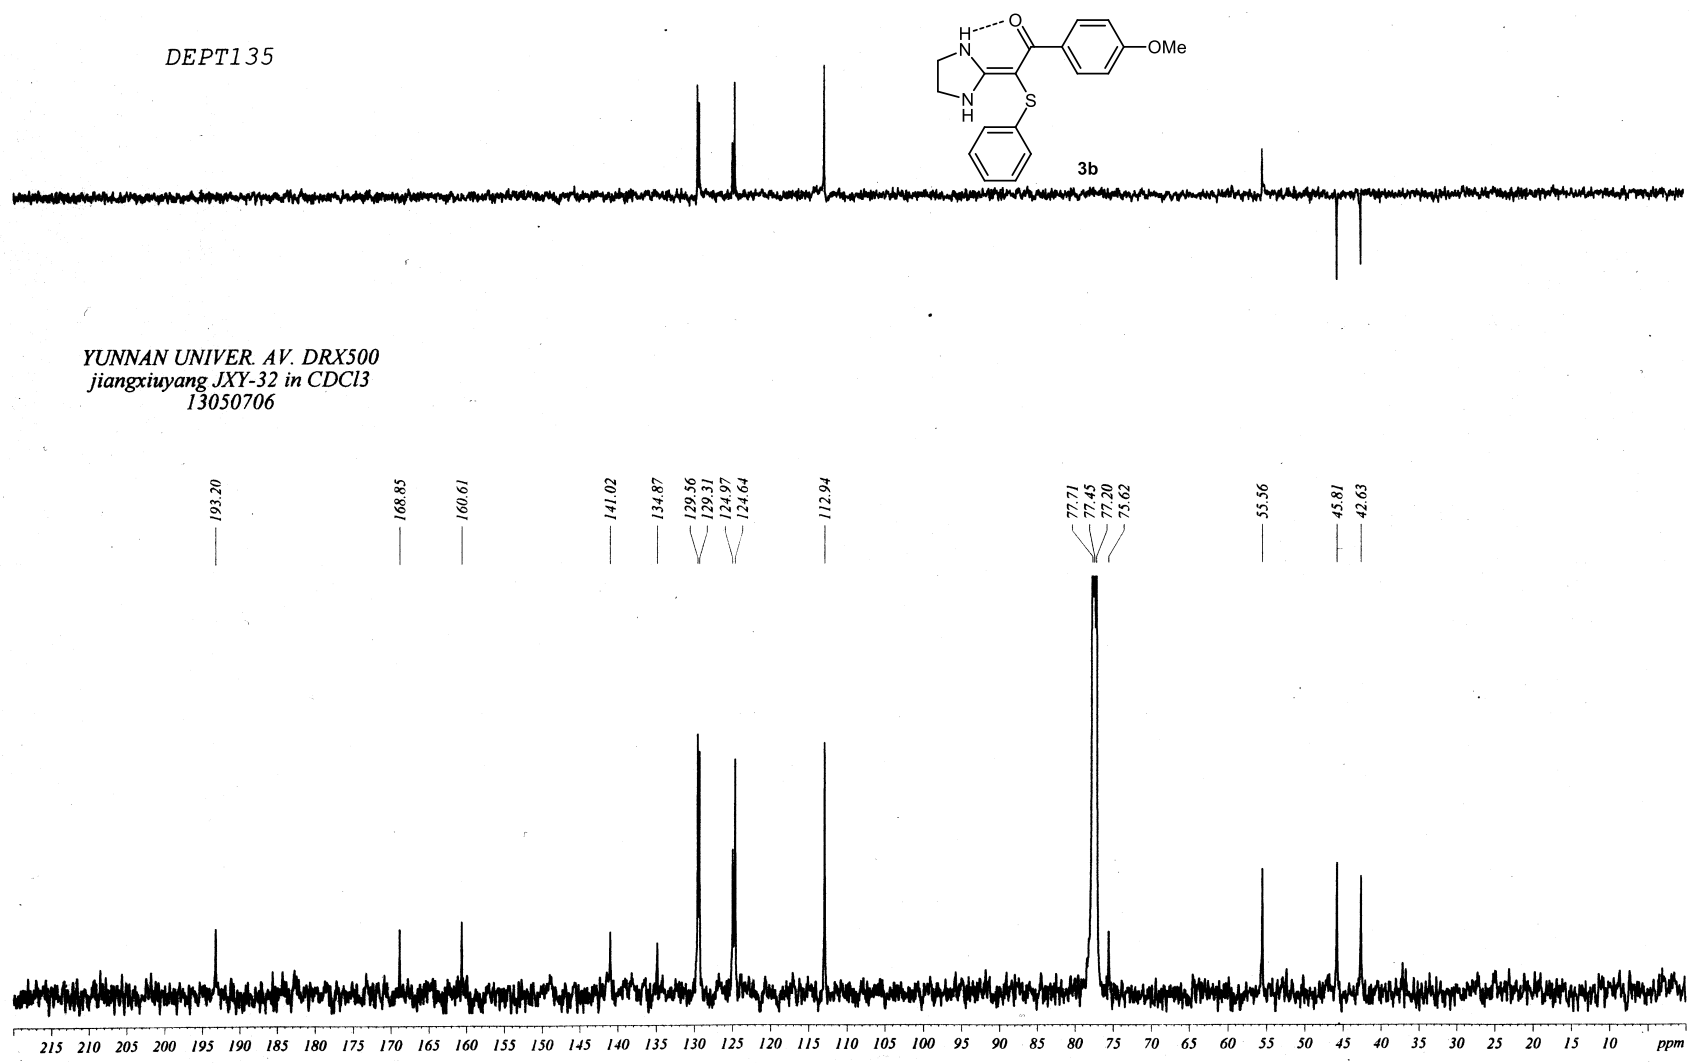

Figure S4 <sup>13</sup>C NMR spectrum (125 MHz, CDCl<sub>3</sub>) of compound 3b

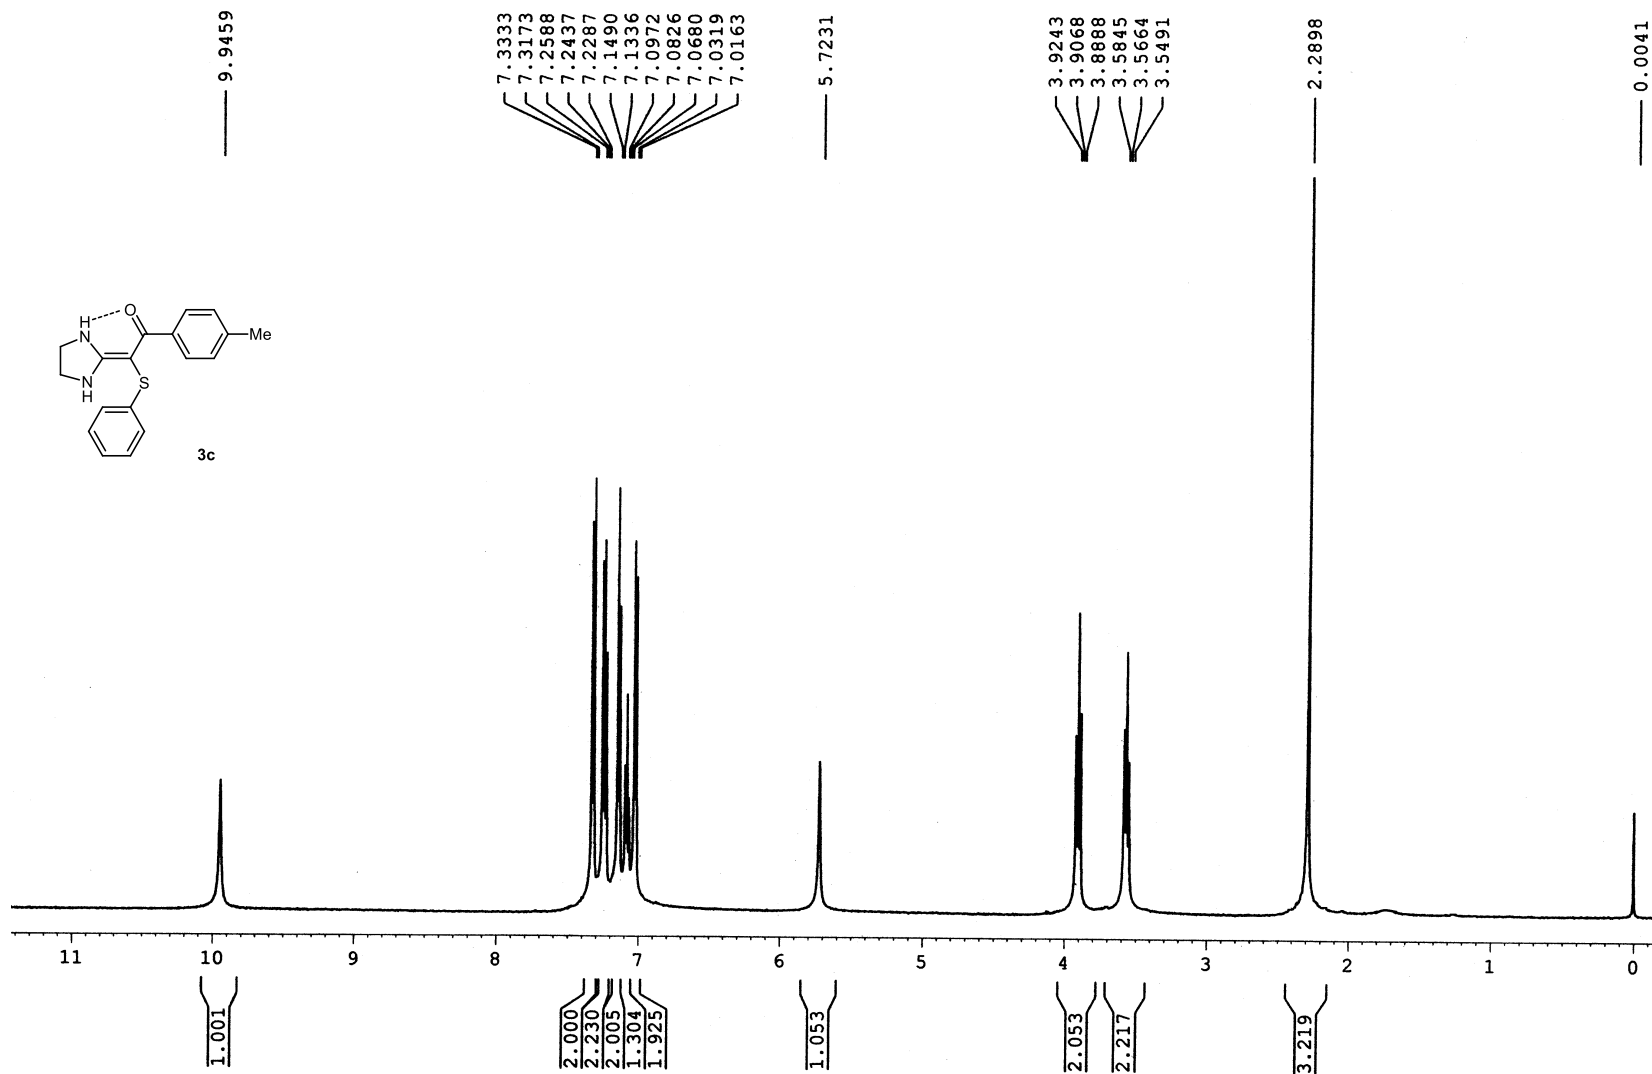

Figure S5  $^1\text{H}$  NMR spectrum (500 MHz,  $\text{CDCl}_3$ ) of compound **3c**

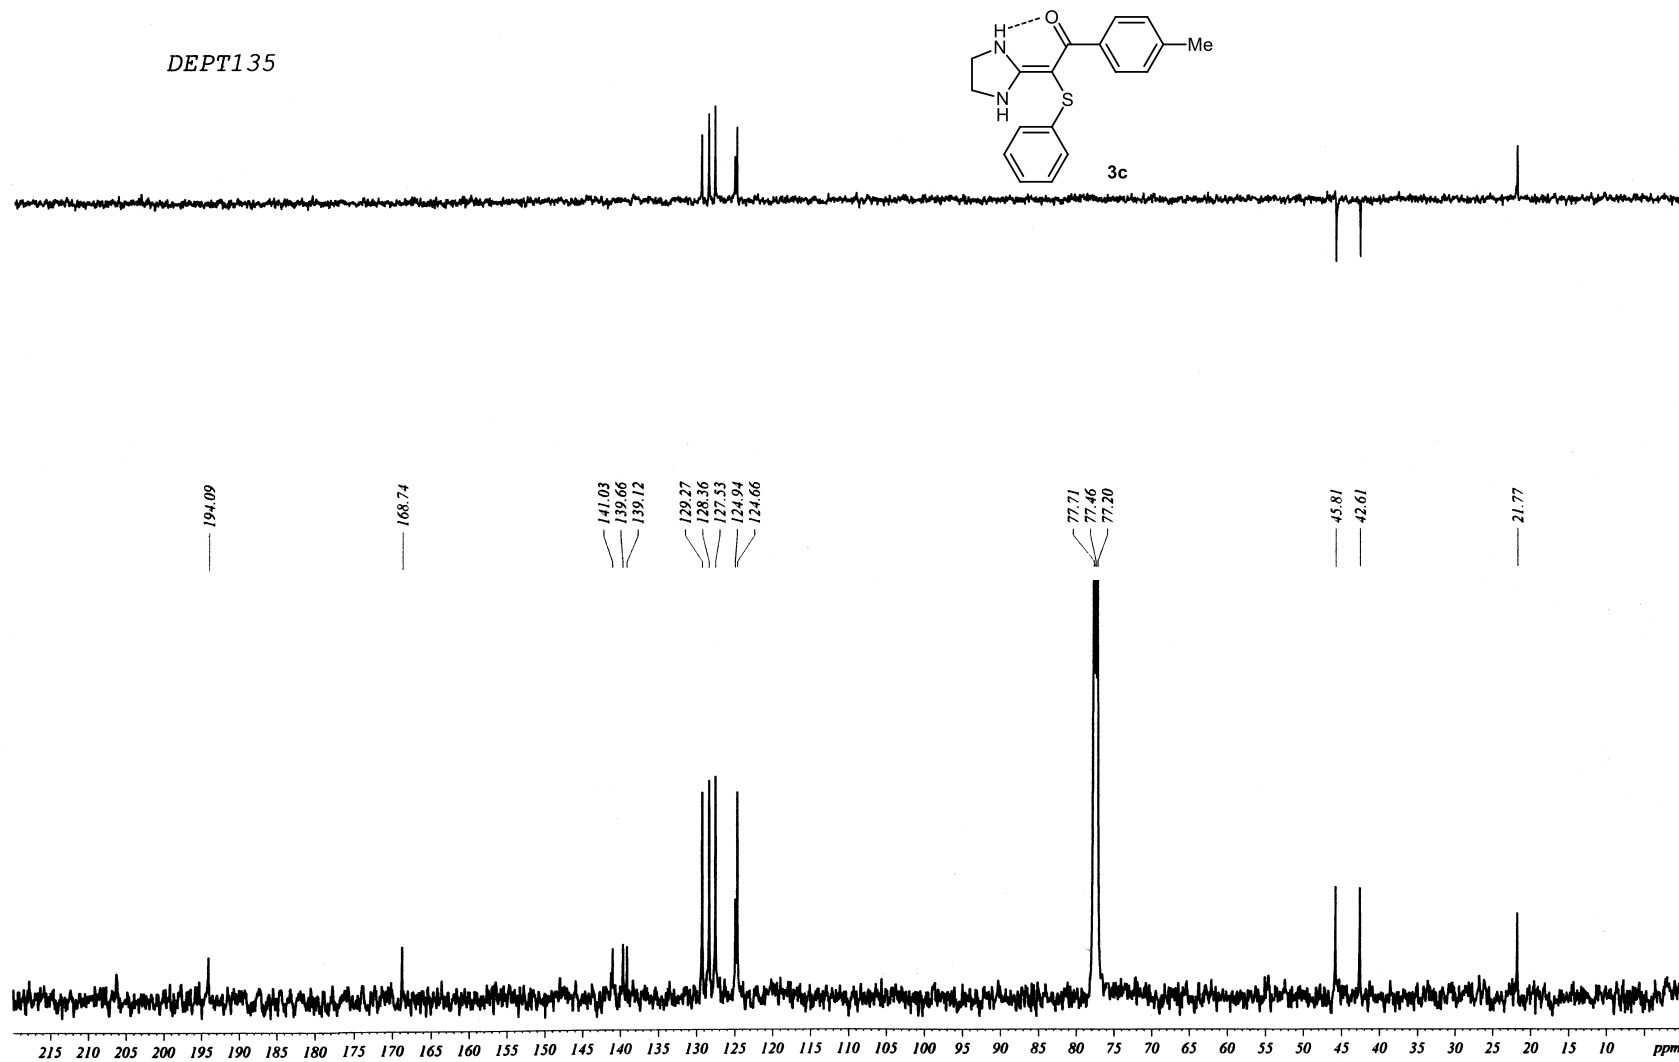

Figure S6  $^{13}\text{C}$  NMR spectrum (125 MHz,  $\text{CDCl}_3$ ) of compound 3c

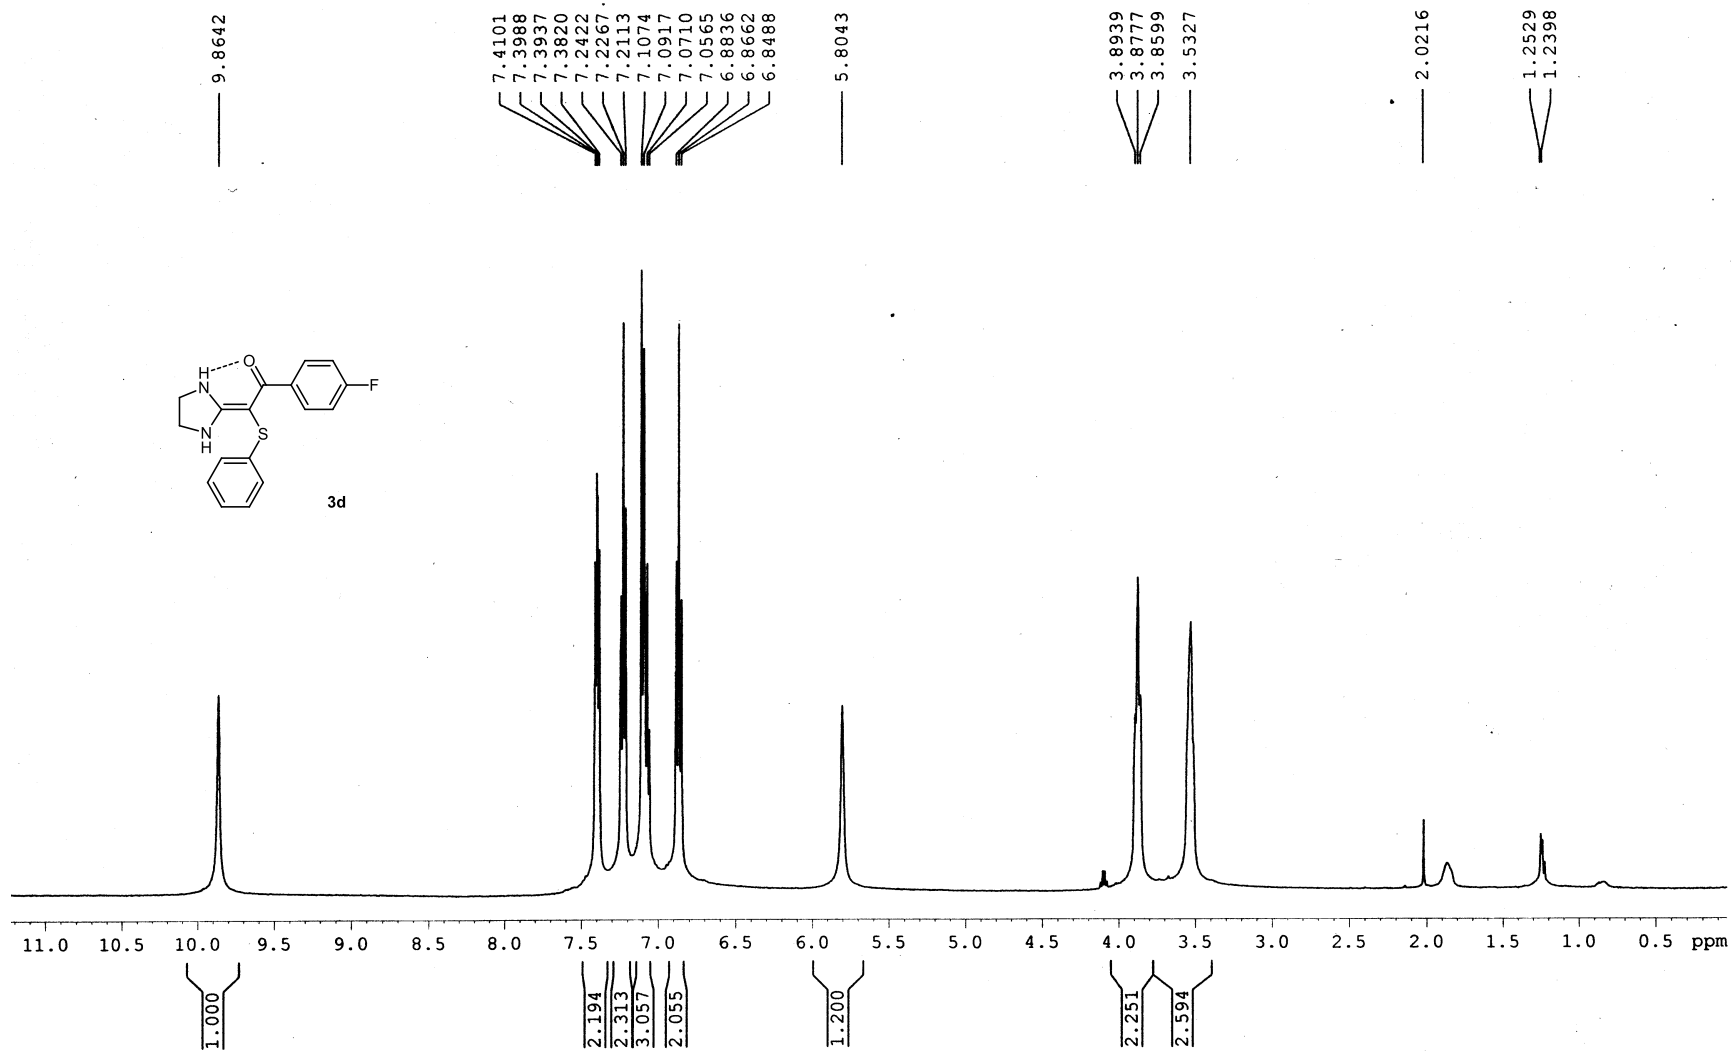

**Figure S7**  $^1\text{H}$  NMR spectrum (500 MHz,  $\text{CDCl}_3$ ) of compound **3d**

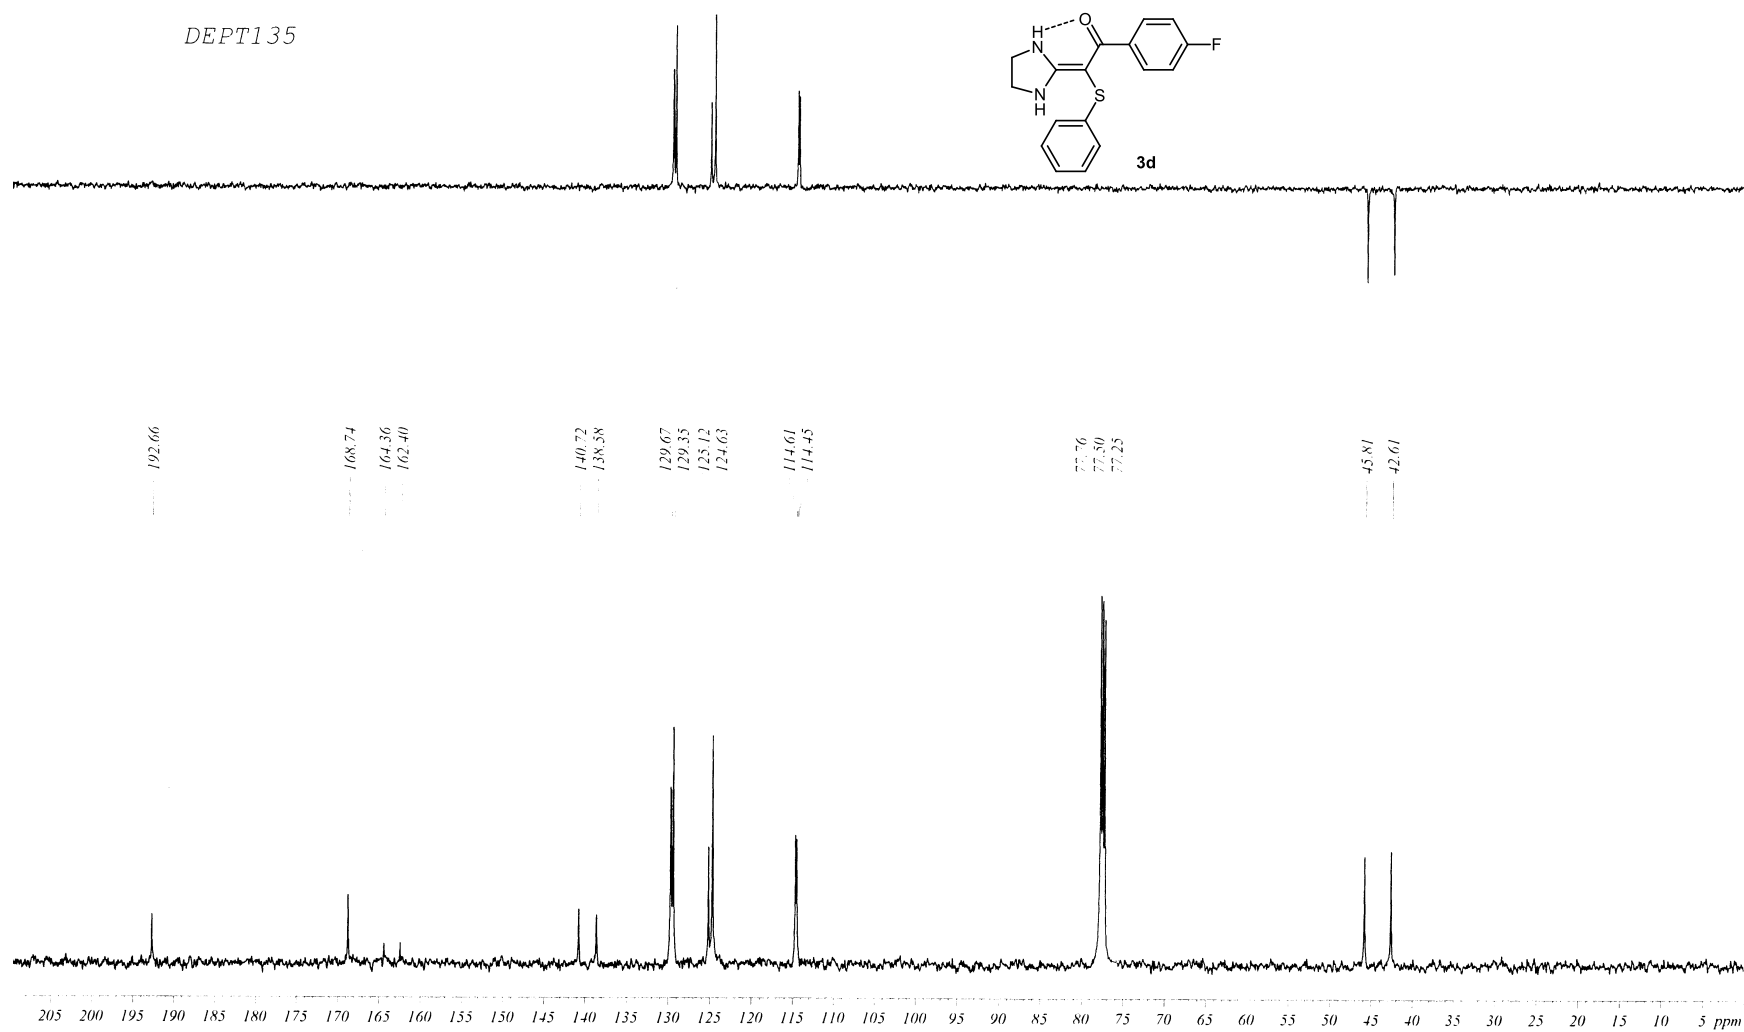

**Figure S8**  $^{13}\text{C}$  NMR spectrum (125 MHz,  $\text{CDCl}_3$ ) of compound **3d**



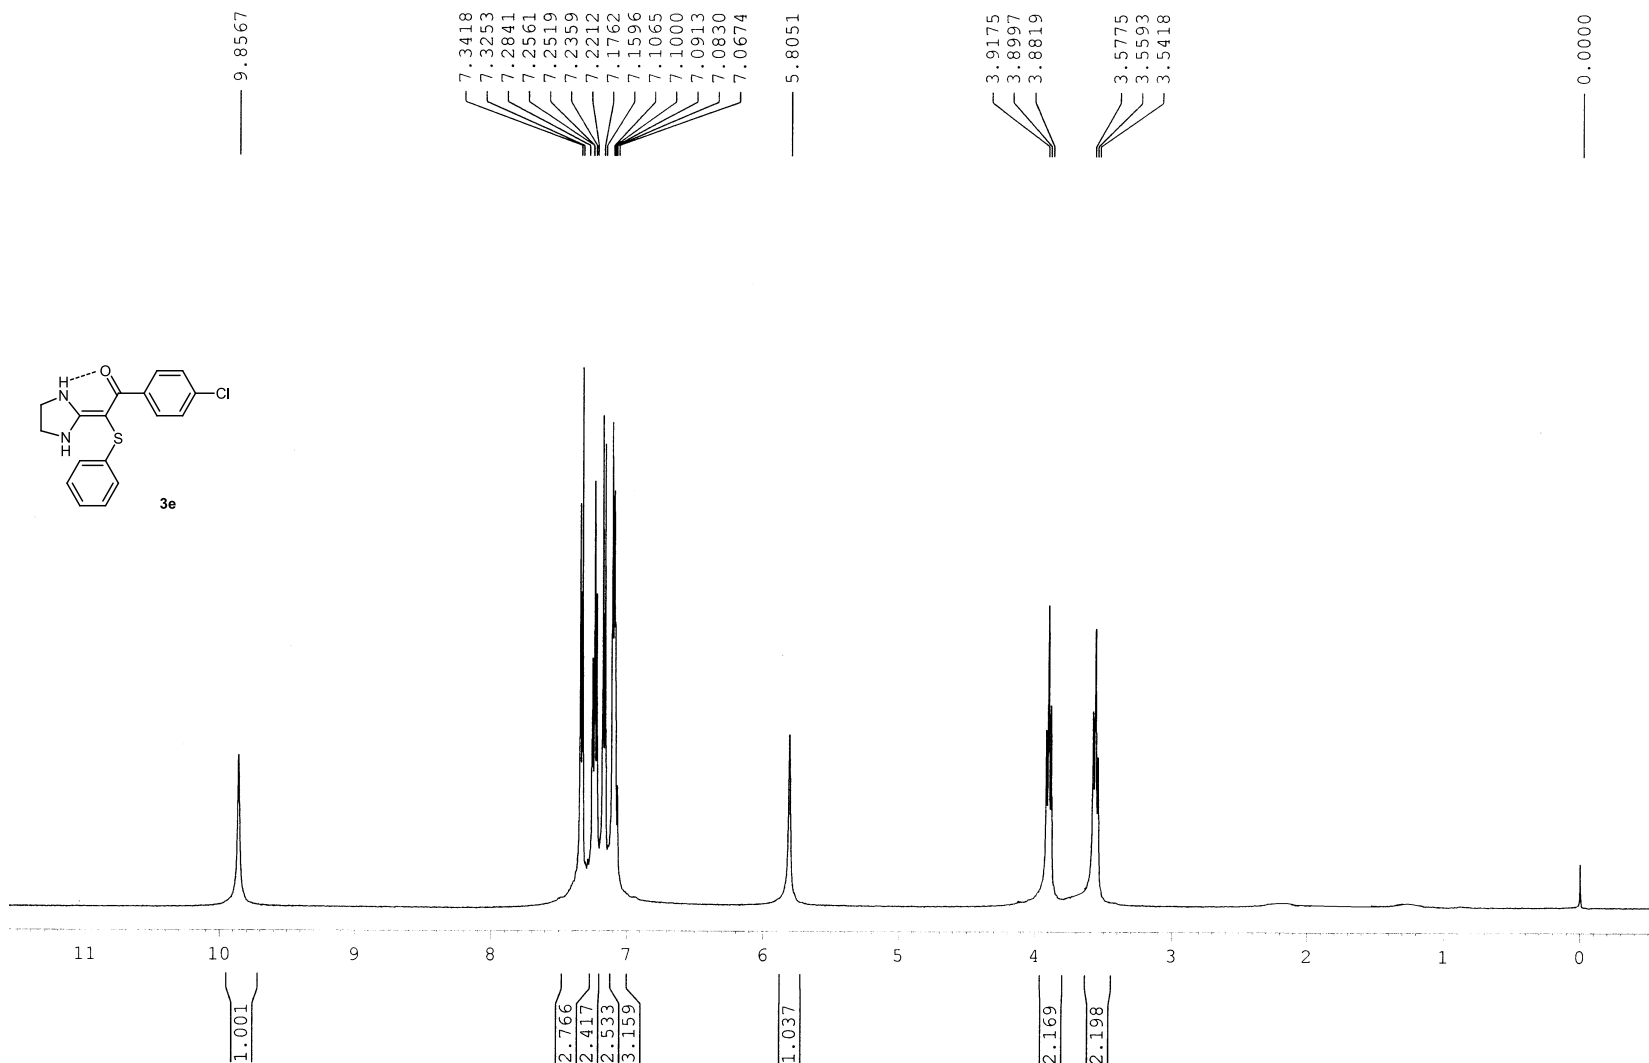

**Figure S9**  $^1\text{H NMR}$  spectrum (500 MHz,  $\text{CDCl}_3$ ) of compound **3e**

DEPT135

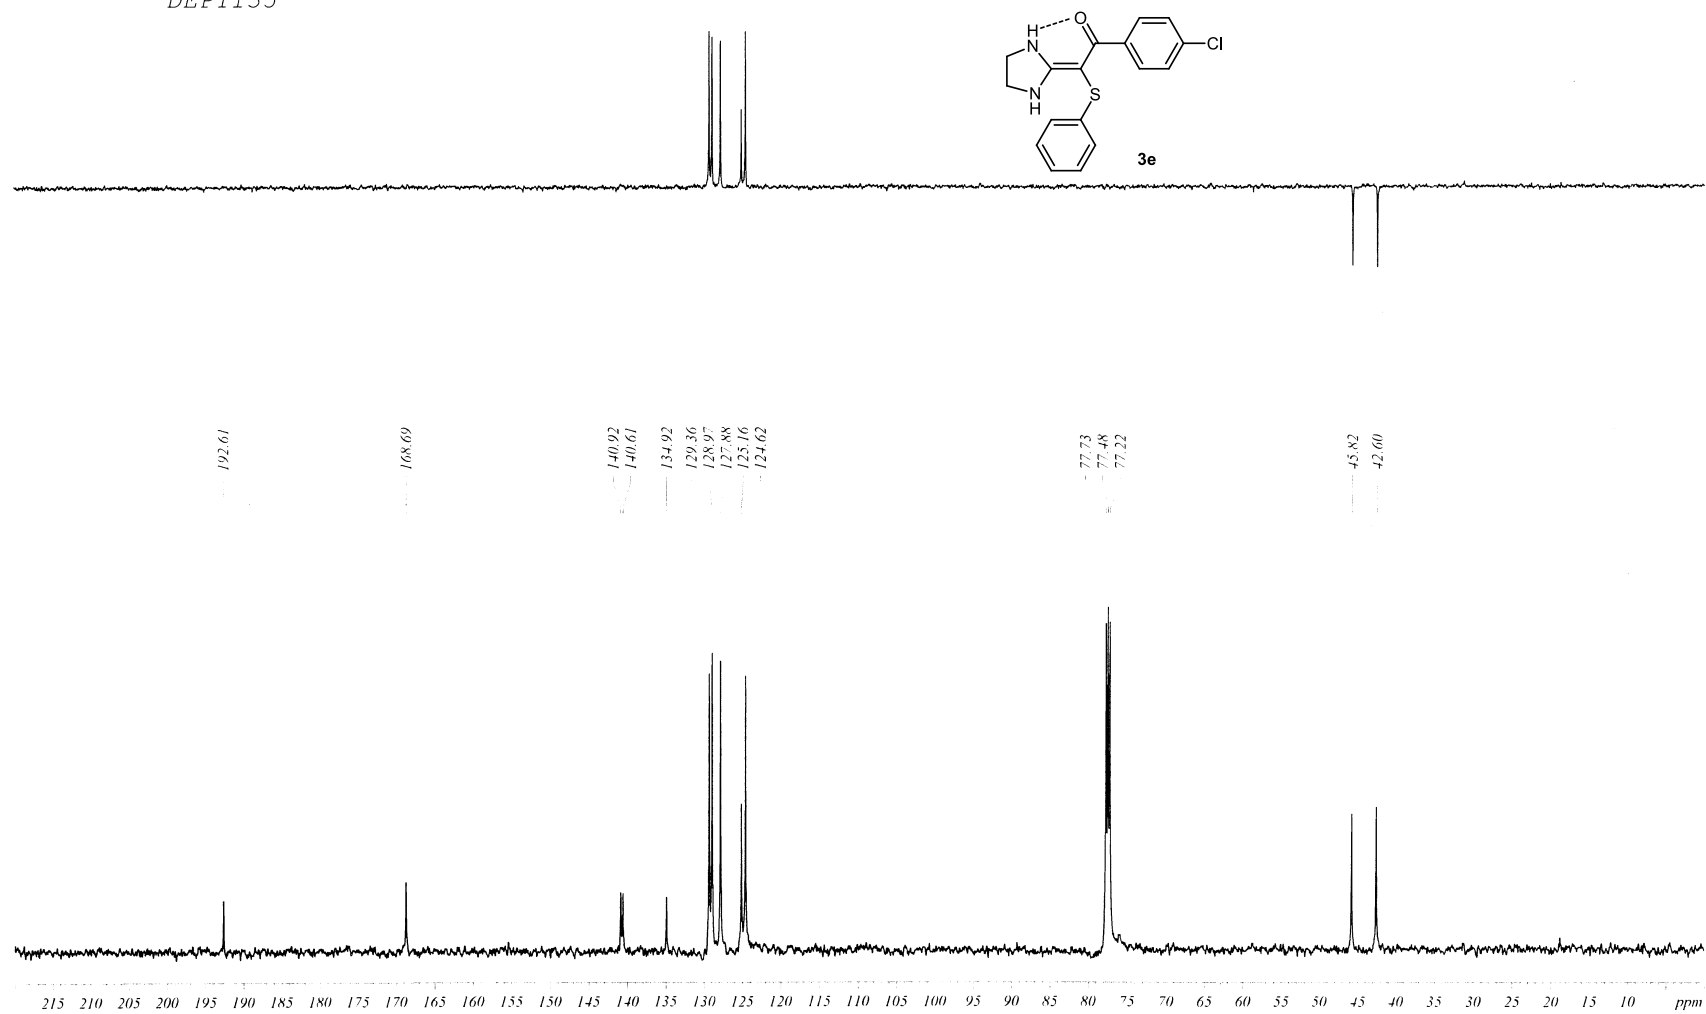

Figure S10 <sup>13</sup>C NMR spectrum (125 MHz, CDCl<sub>3</sub>) of compound **3e**

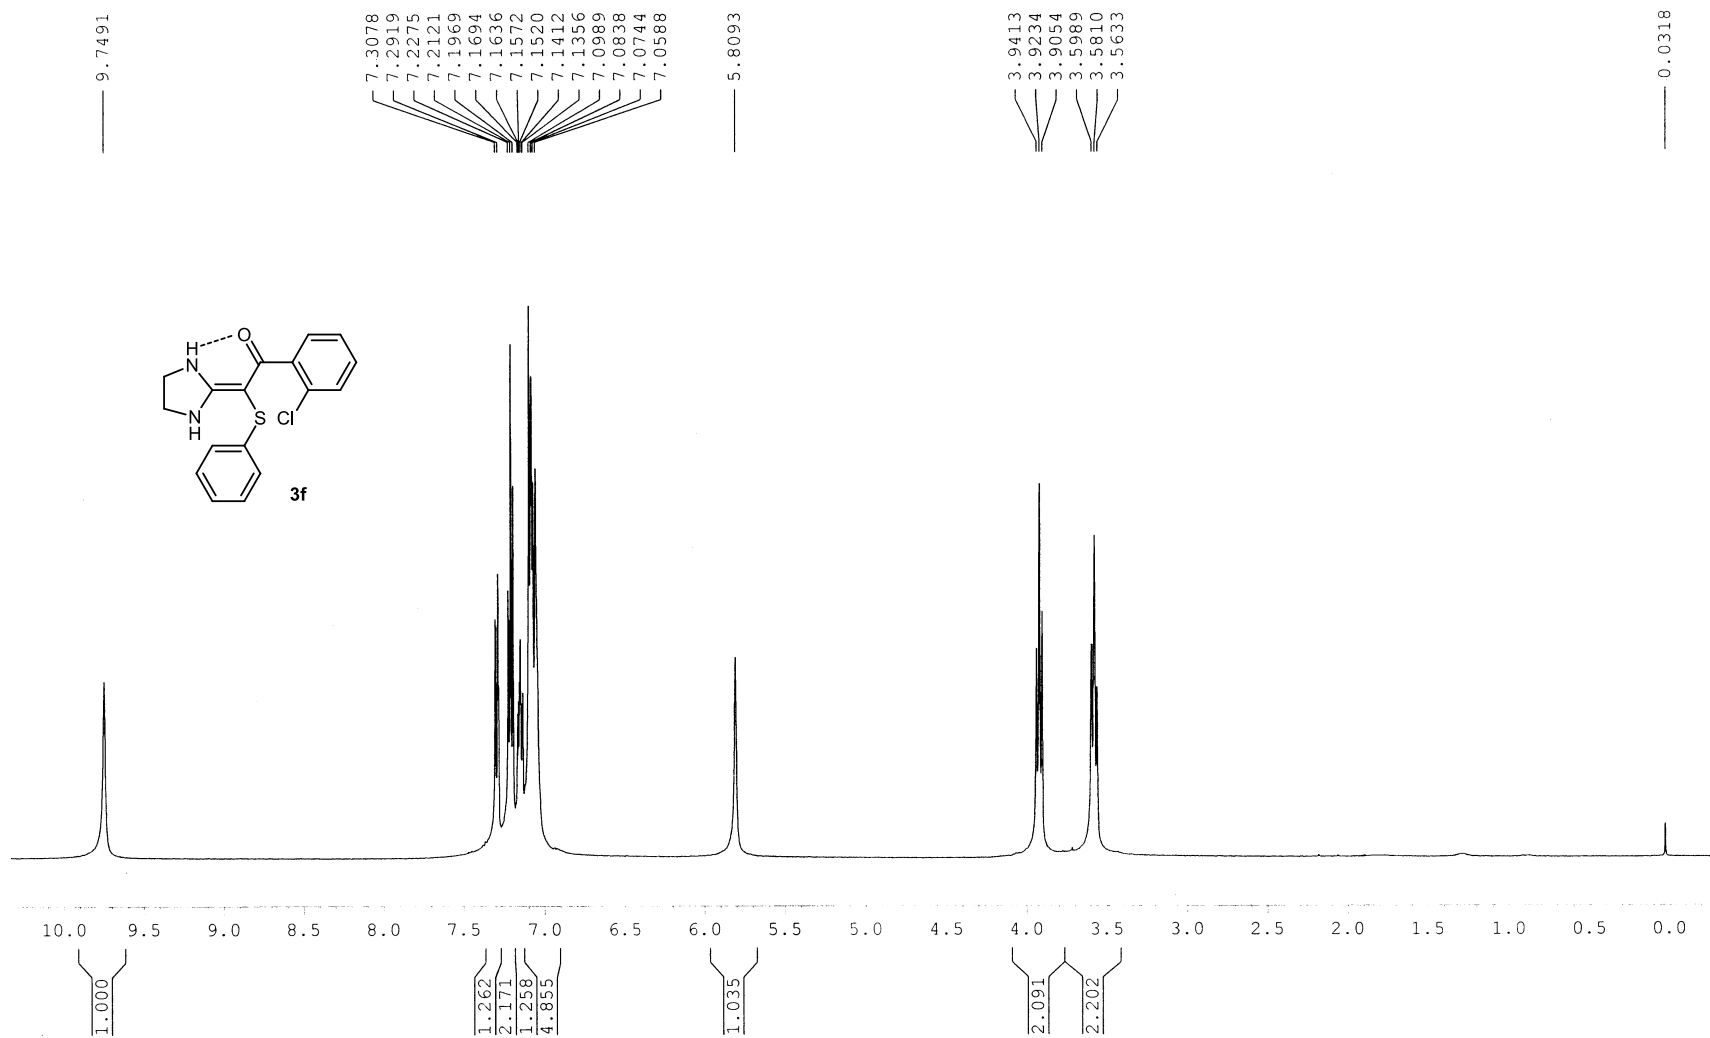

**Figure S11**  $^1\text{H}$  NMR spectrum (500 MHz,  $\text{CDCl}_3$ ) of compound **3f**

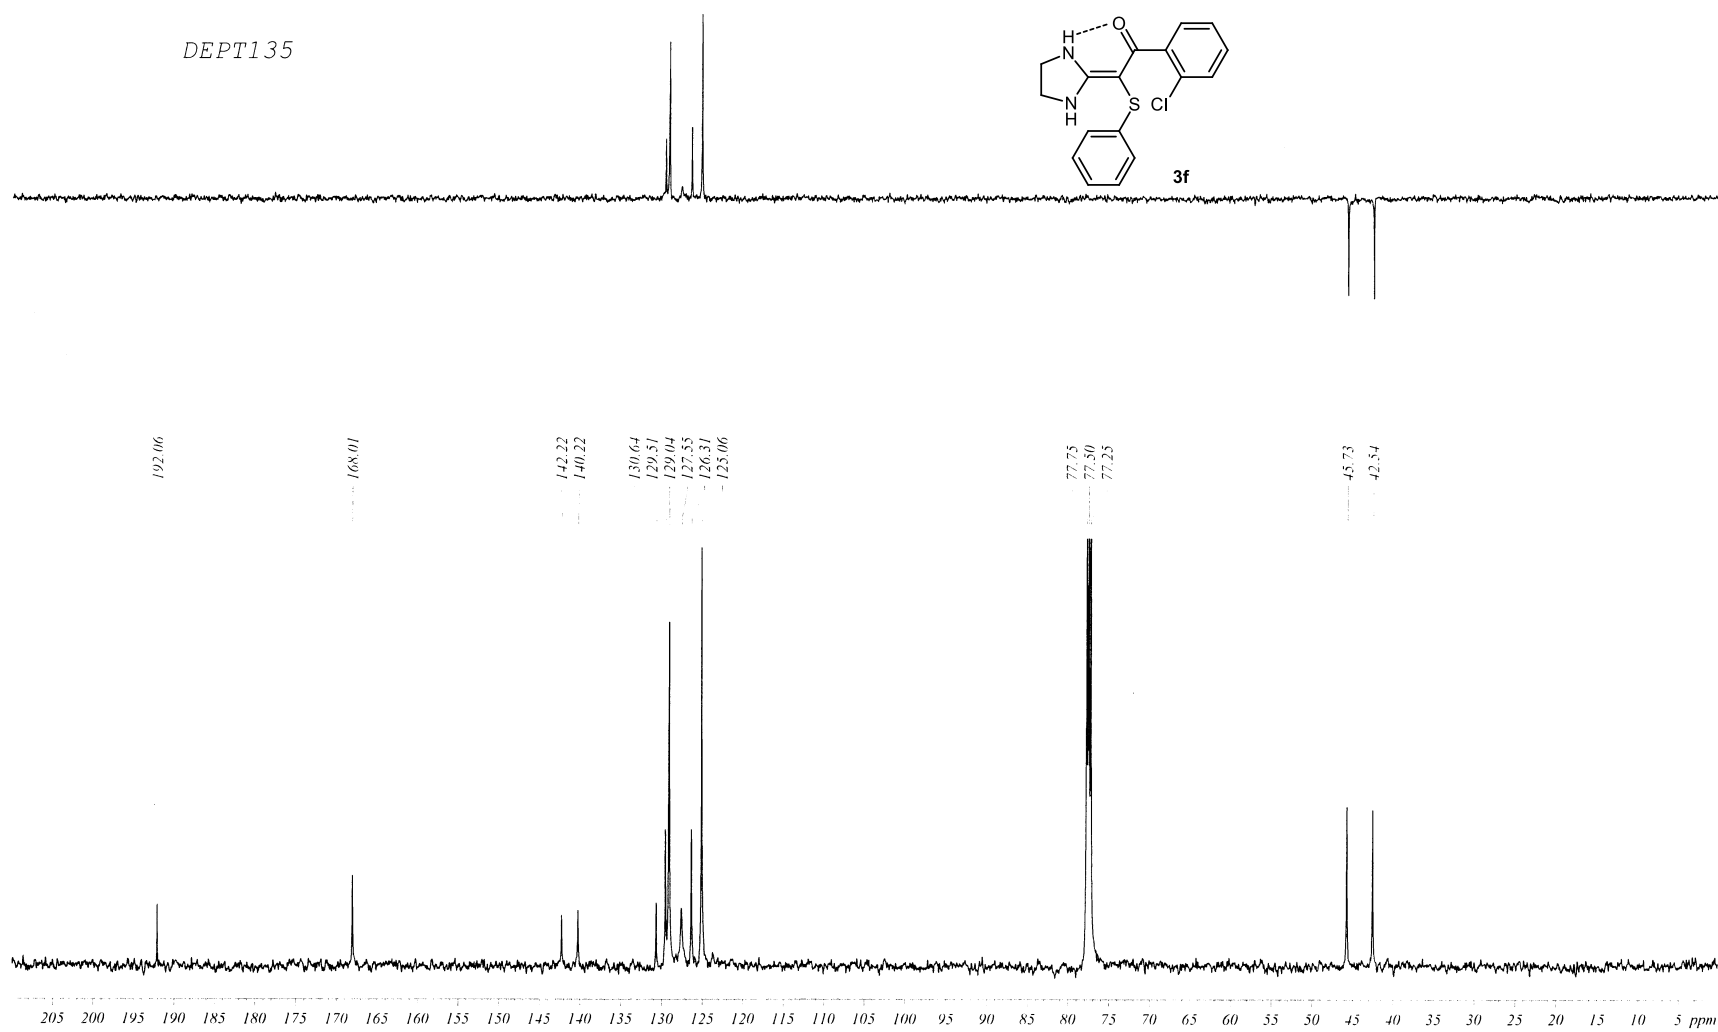

**Figure S12**  $^{13}\text{C}$  NMR spectrum (125 MHz,  $\text{CDCl}_3$ ) of compound **3f**

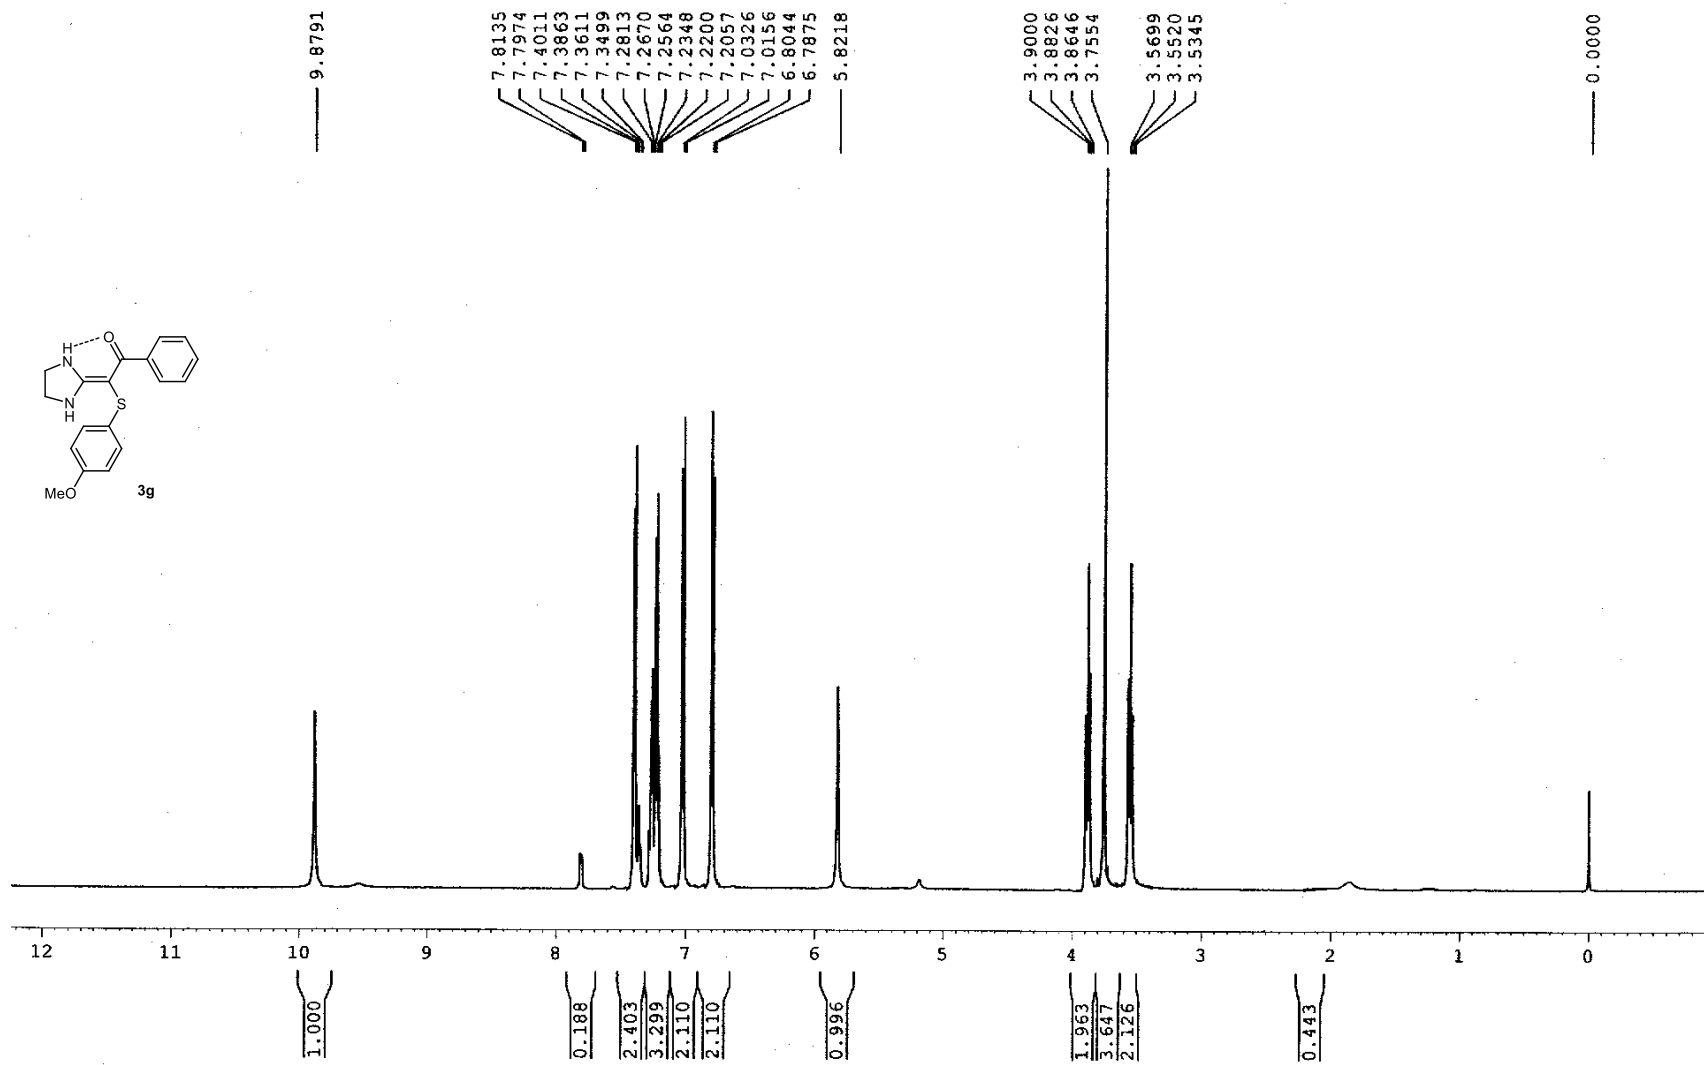

Figure S13 <sup>1</sup>H NMR spectrum (500 MHz, CDCl<sub>3</sub>) of compound **3g**

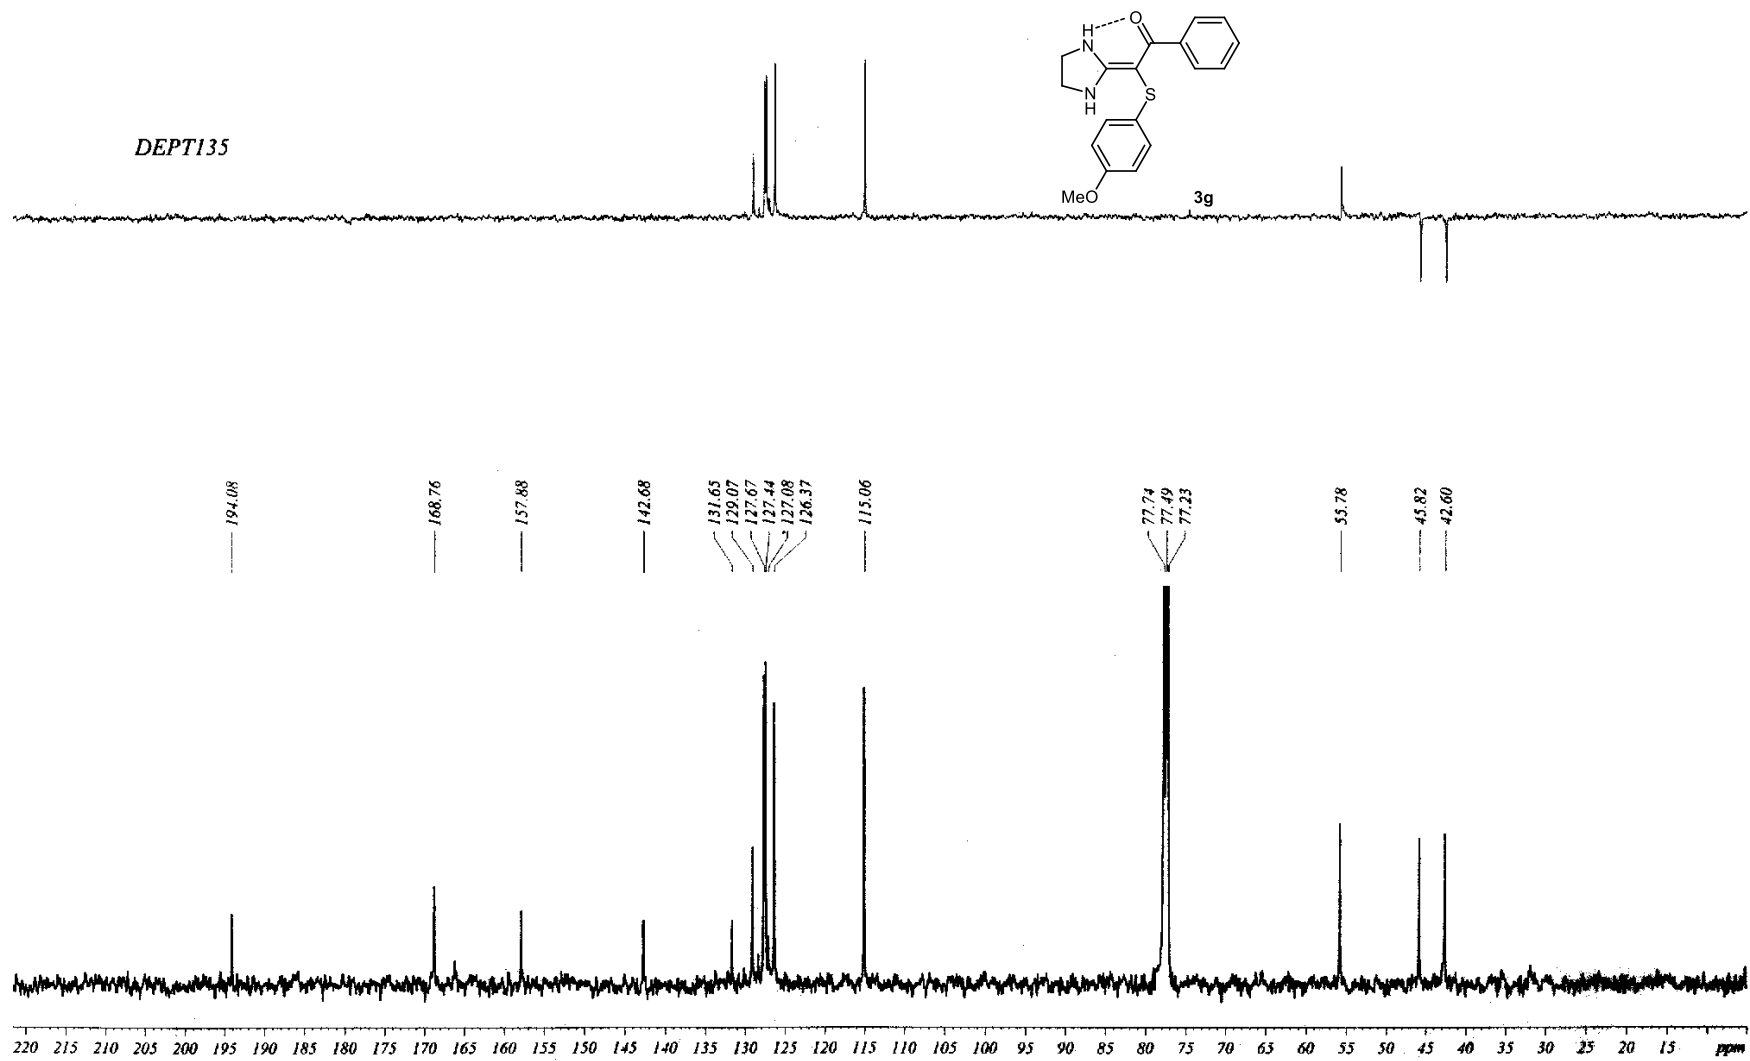

Figure S14  $^{13}\text{C}$  NMR spectrum (125 MHz,  $\text{CDCl}_3$ ) of compound **3g**

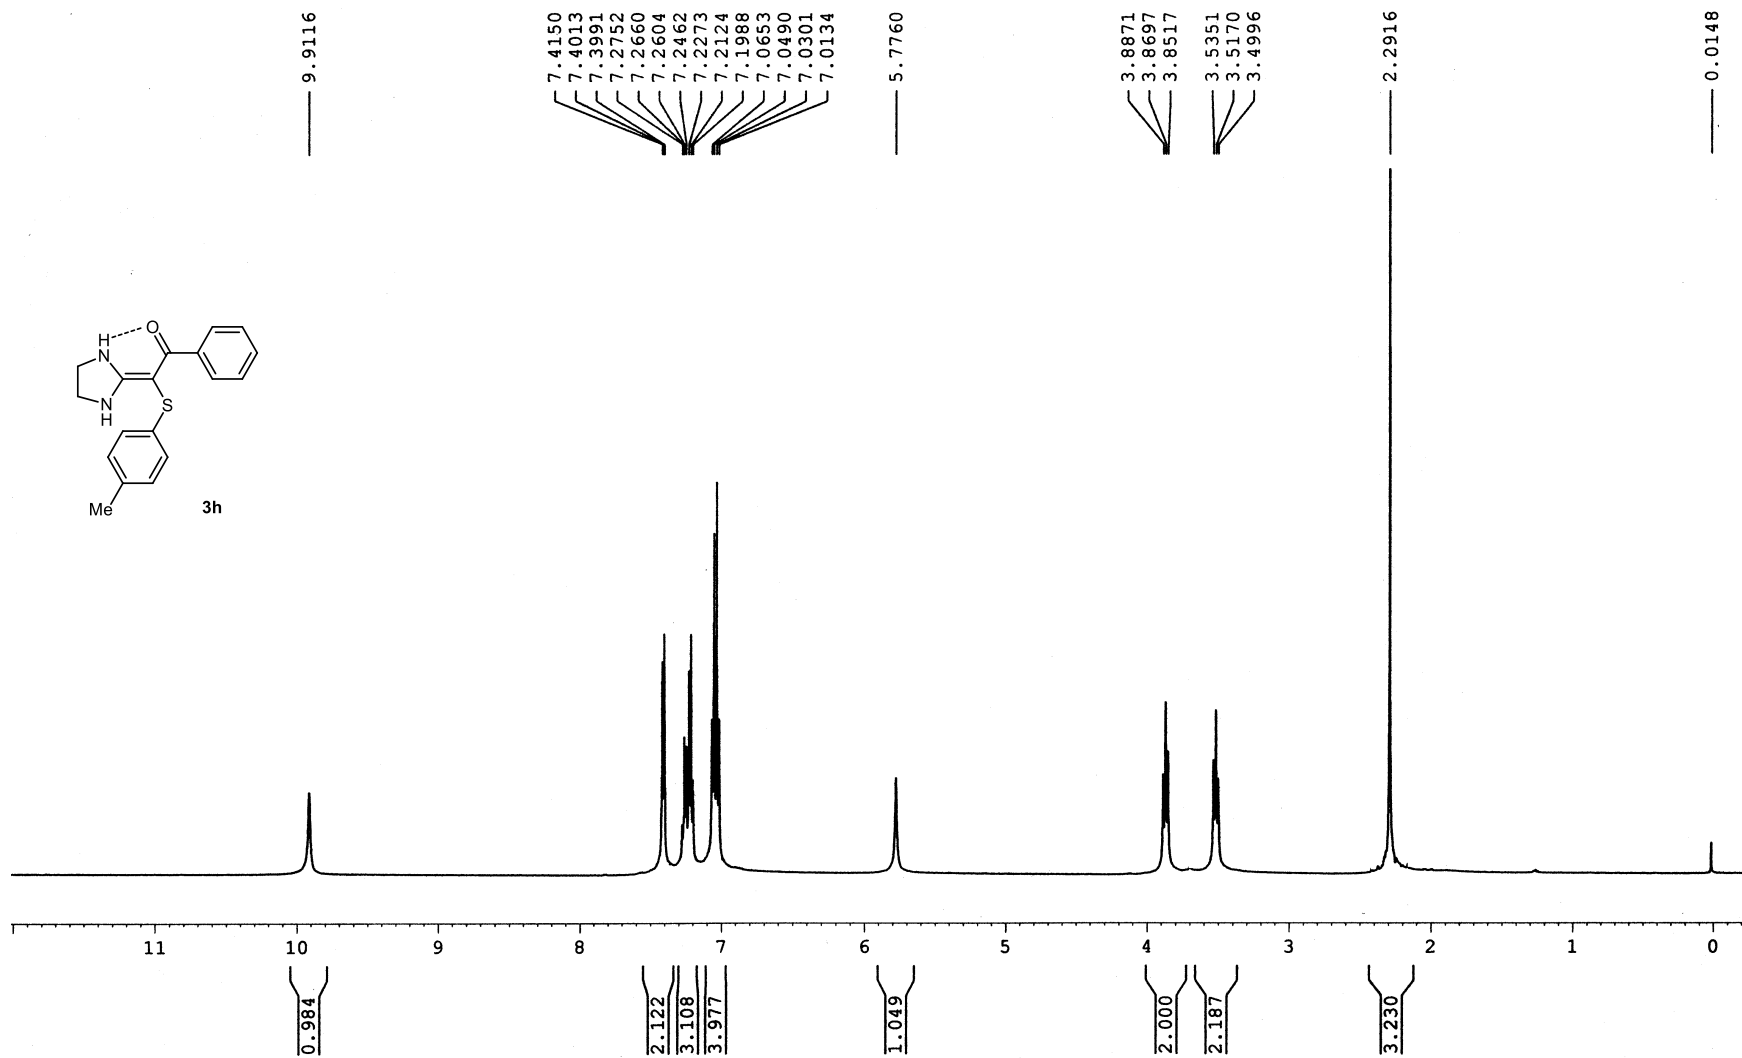

**Figure S15** <sup>1</sup>H NMR spectrum (500 MHz, CDCl<sub>3</sub>) of compound **3h**

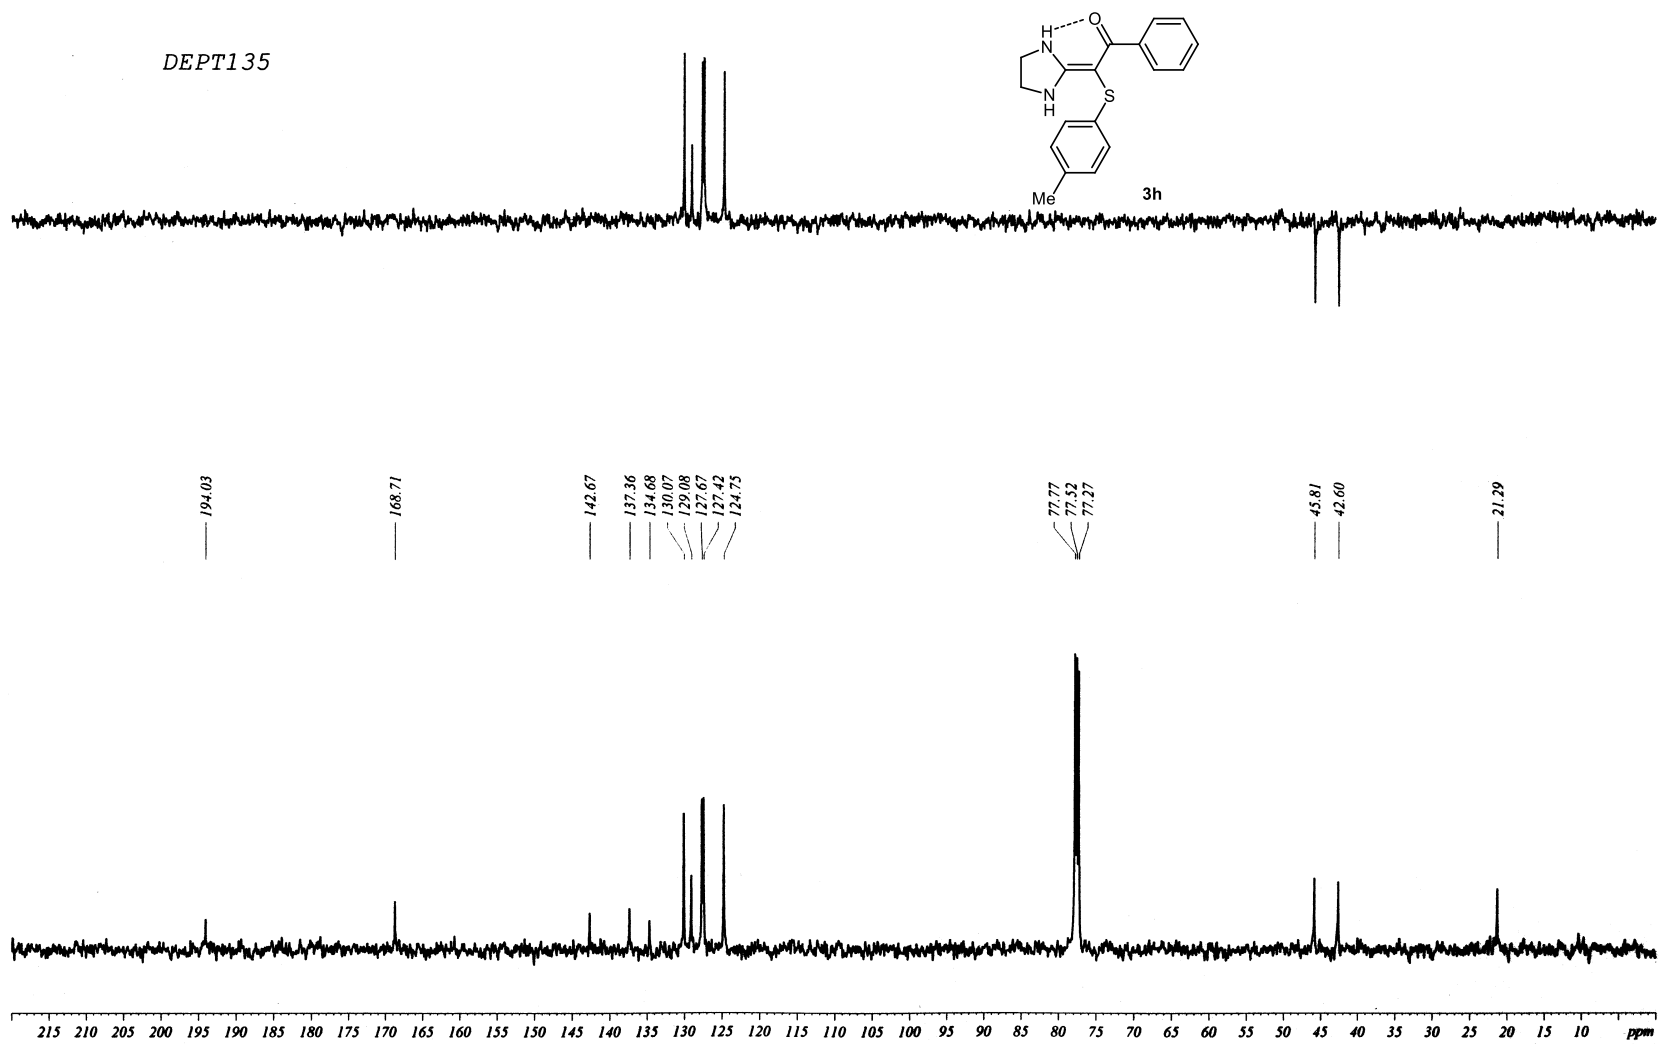

Figure S16  $^{13}\text{C}$  NMR spectrum (125 MHz,  $\text{CDCl}_3$ ) of compound **3h**



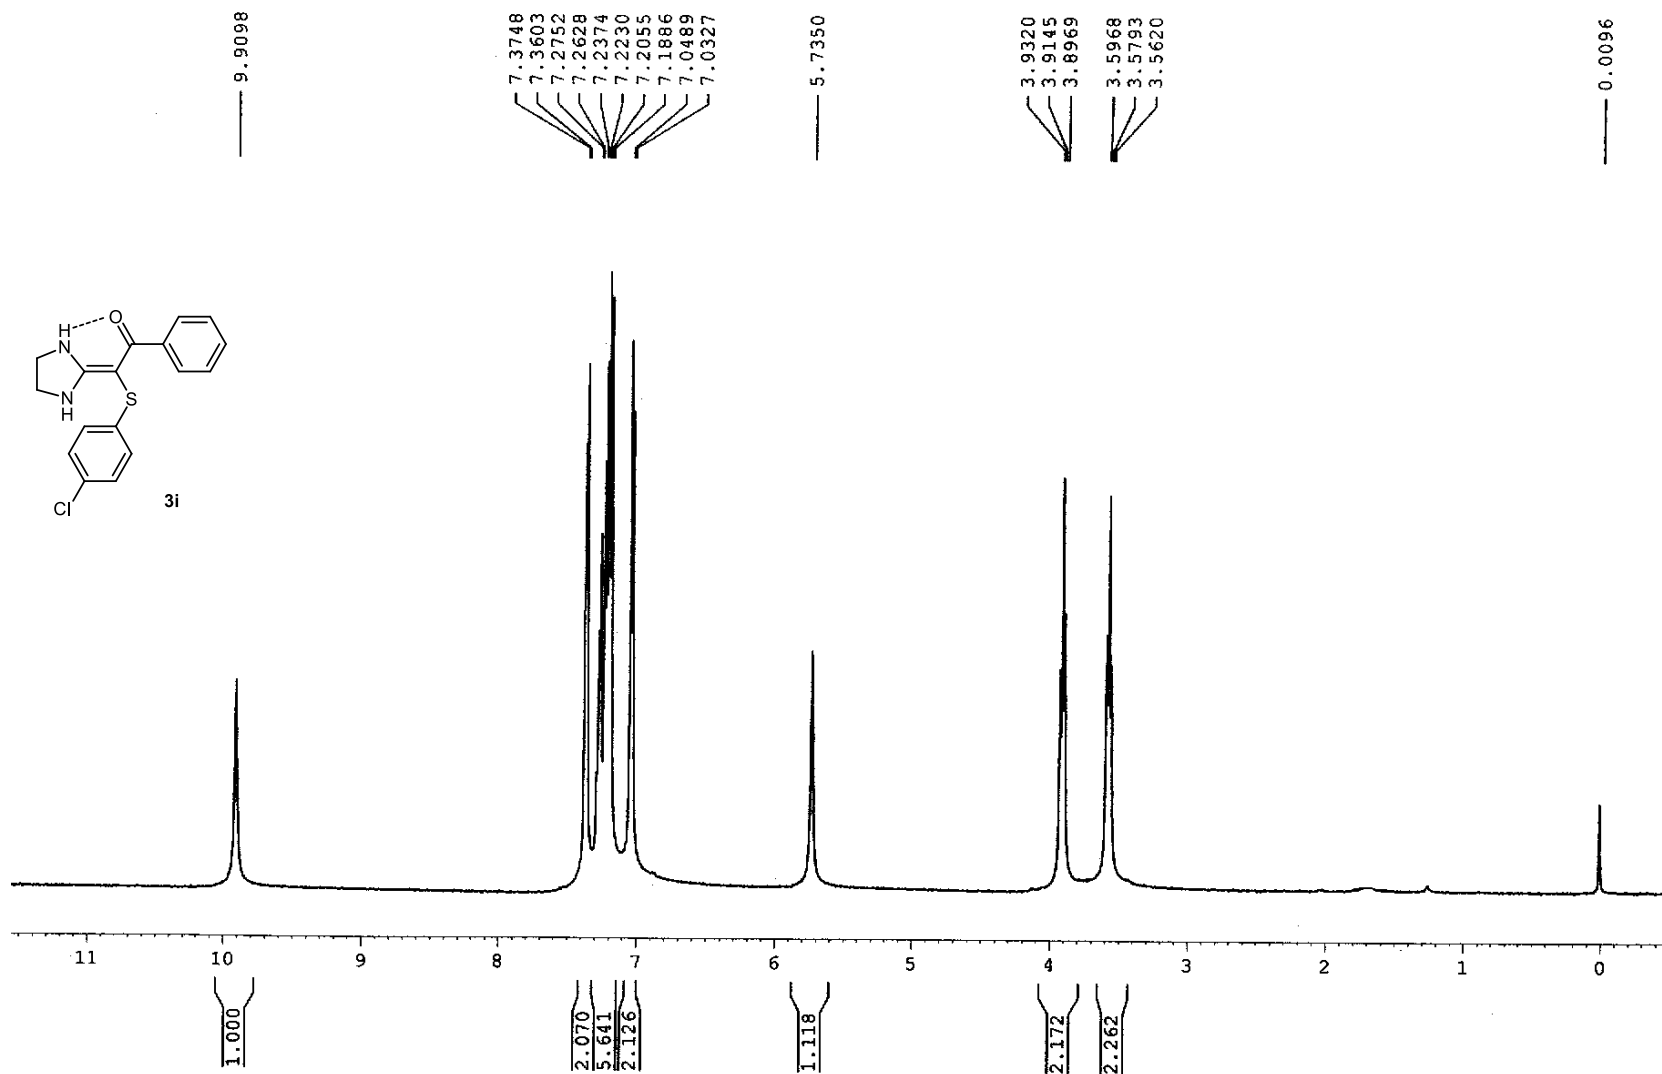

Figure S17  $^1\text{H}$  NMR spectrum (500 MHz,  $\text{CDCl}_3$ ) of compound **3i**

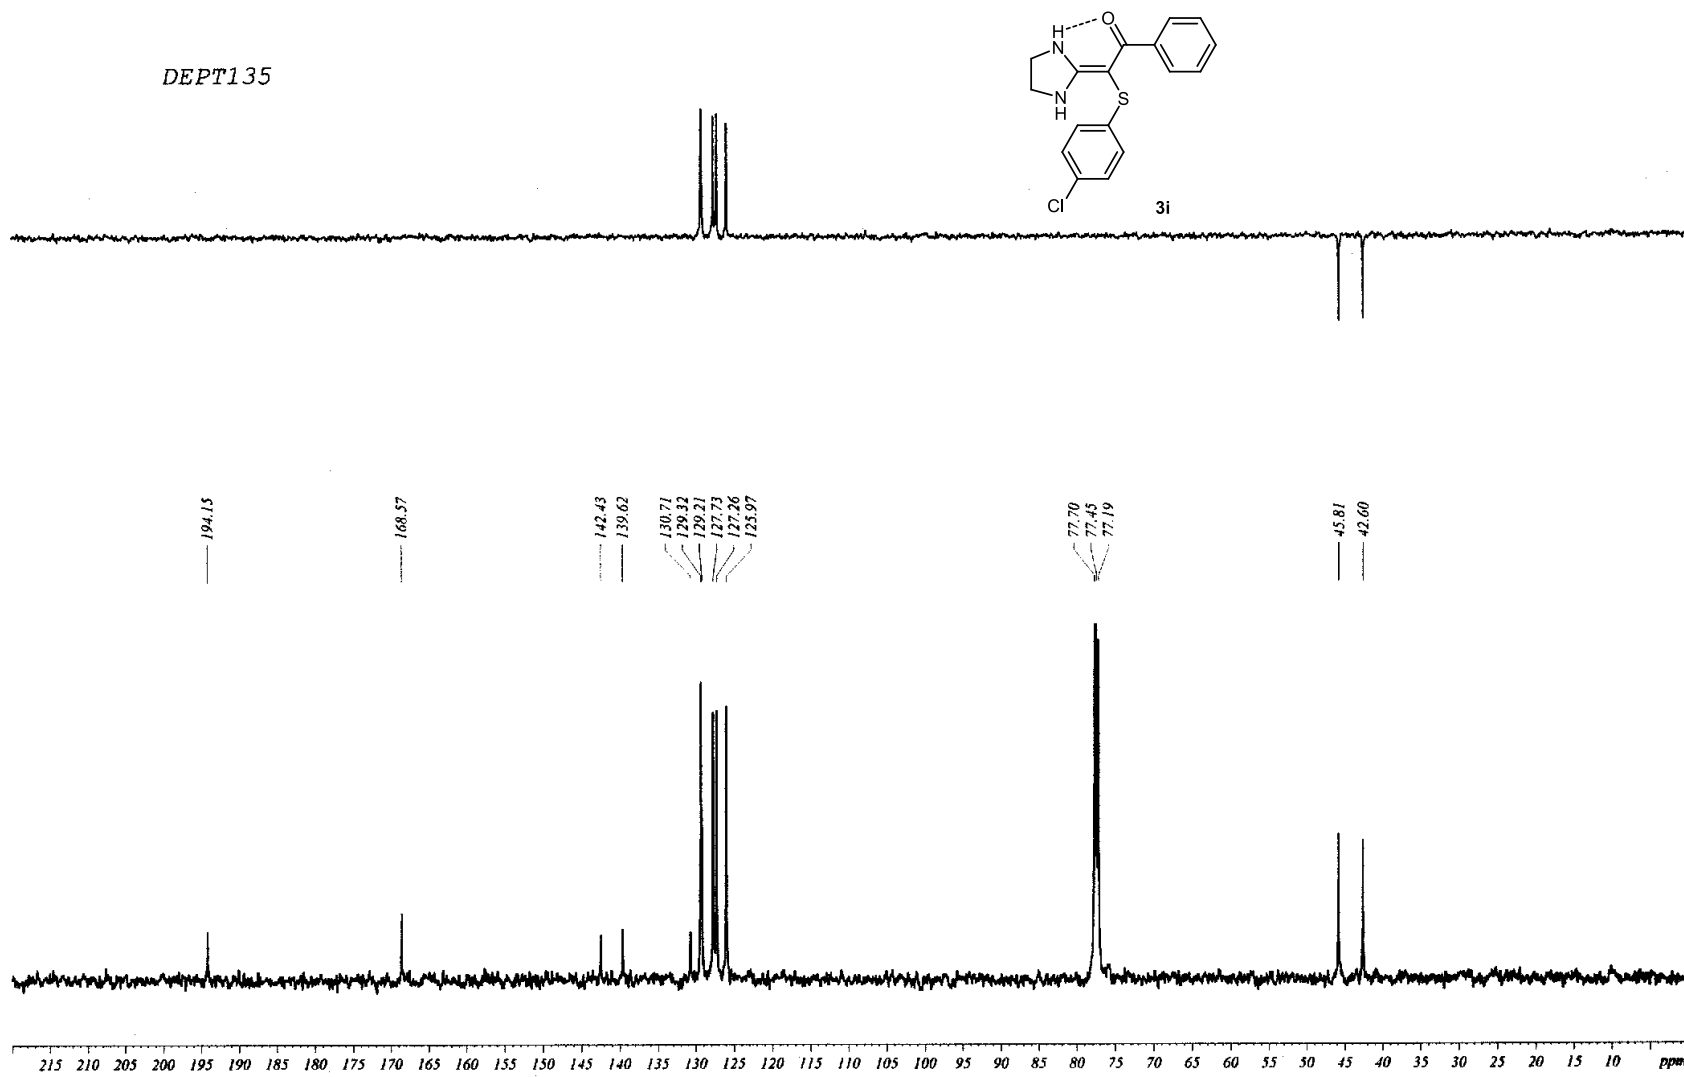

Figure S18  $^{13}\text{C}$  NMR spectrum (125 MHz,  $\text{CDCl}_3$ ) of compound **3i**

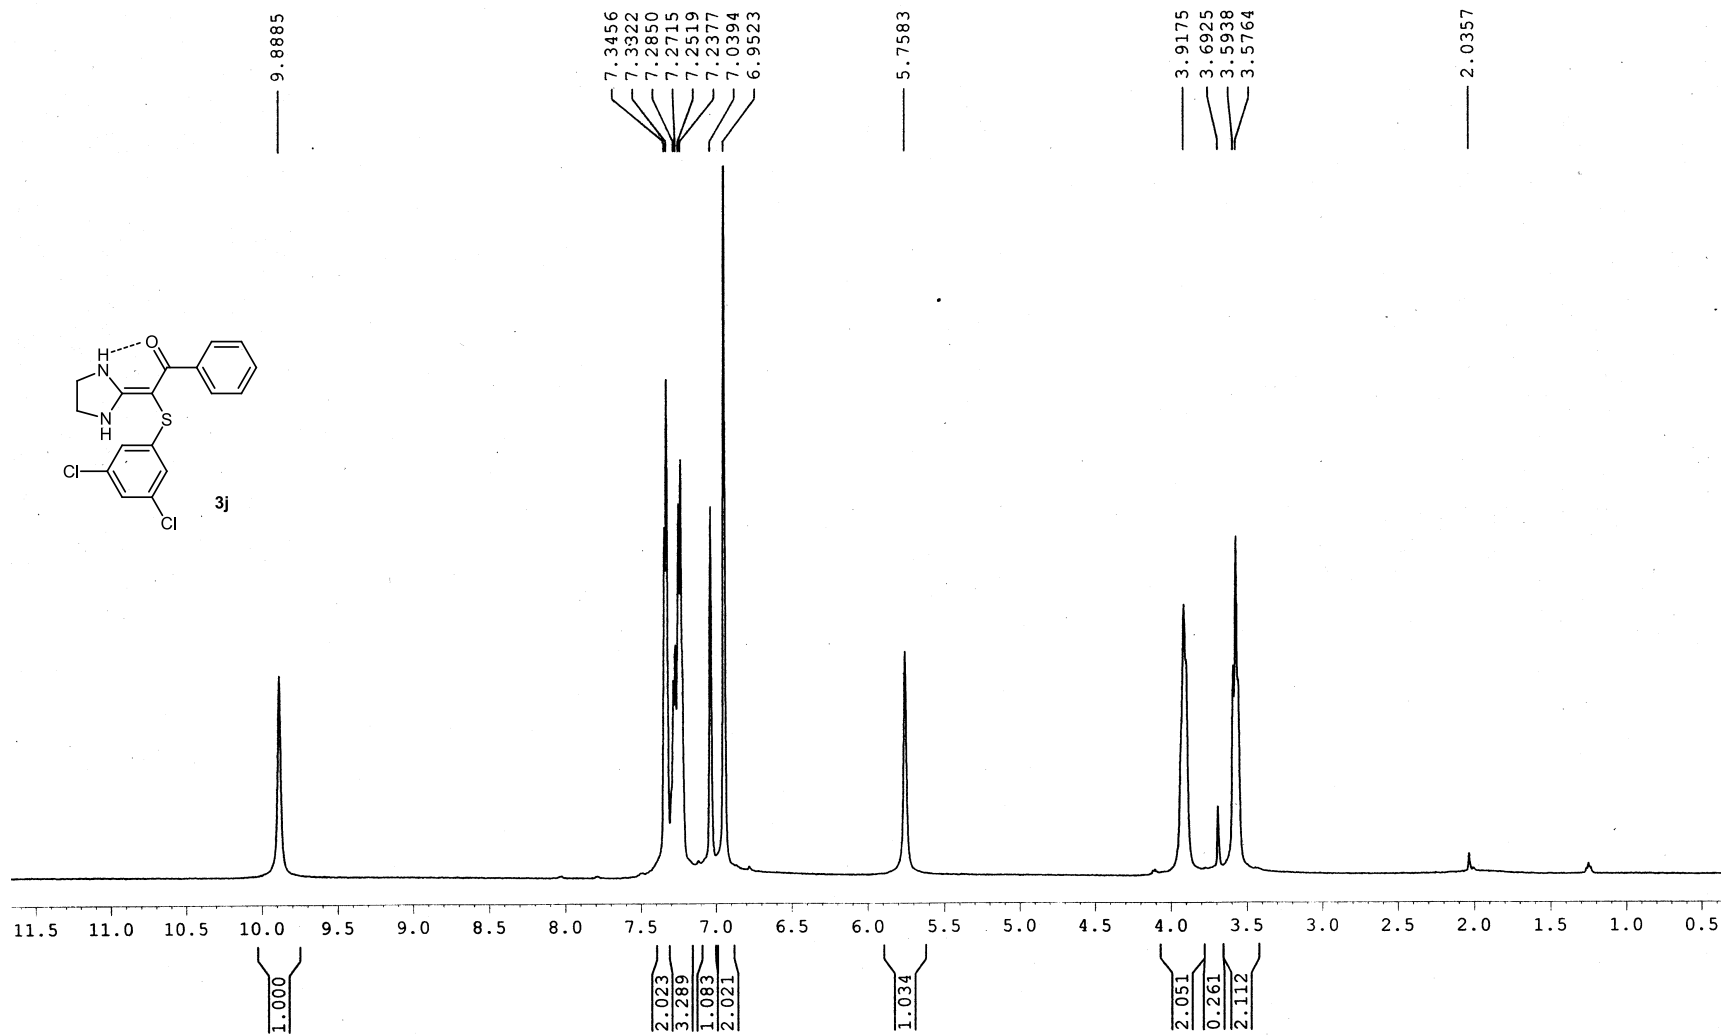

Figure S19  $^1\text{H}$  NMR spectrum (500 MHz,  $\text{CDCl}_3$ ) of compound **3j**

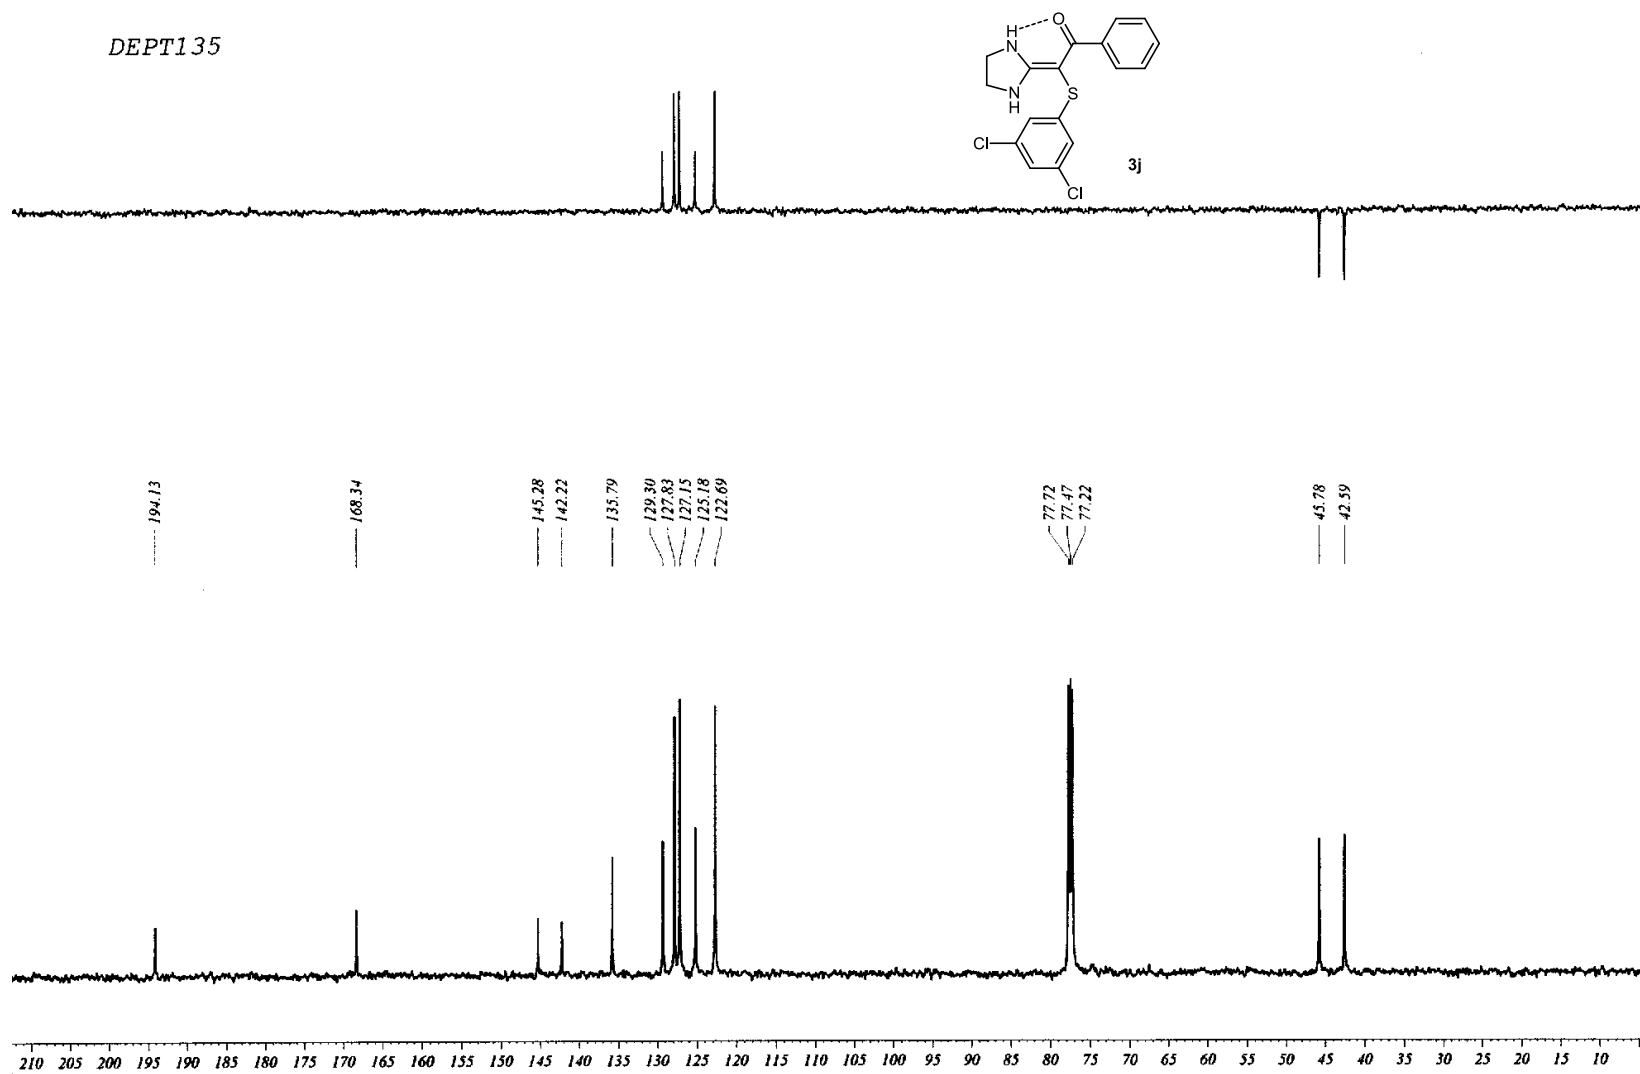

Figure S20  $^{13}\text{C}$  NMR spectrum (125 MHz,  $\text{CDCl}_3$ ) of compound **3j**

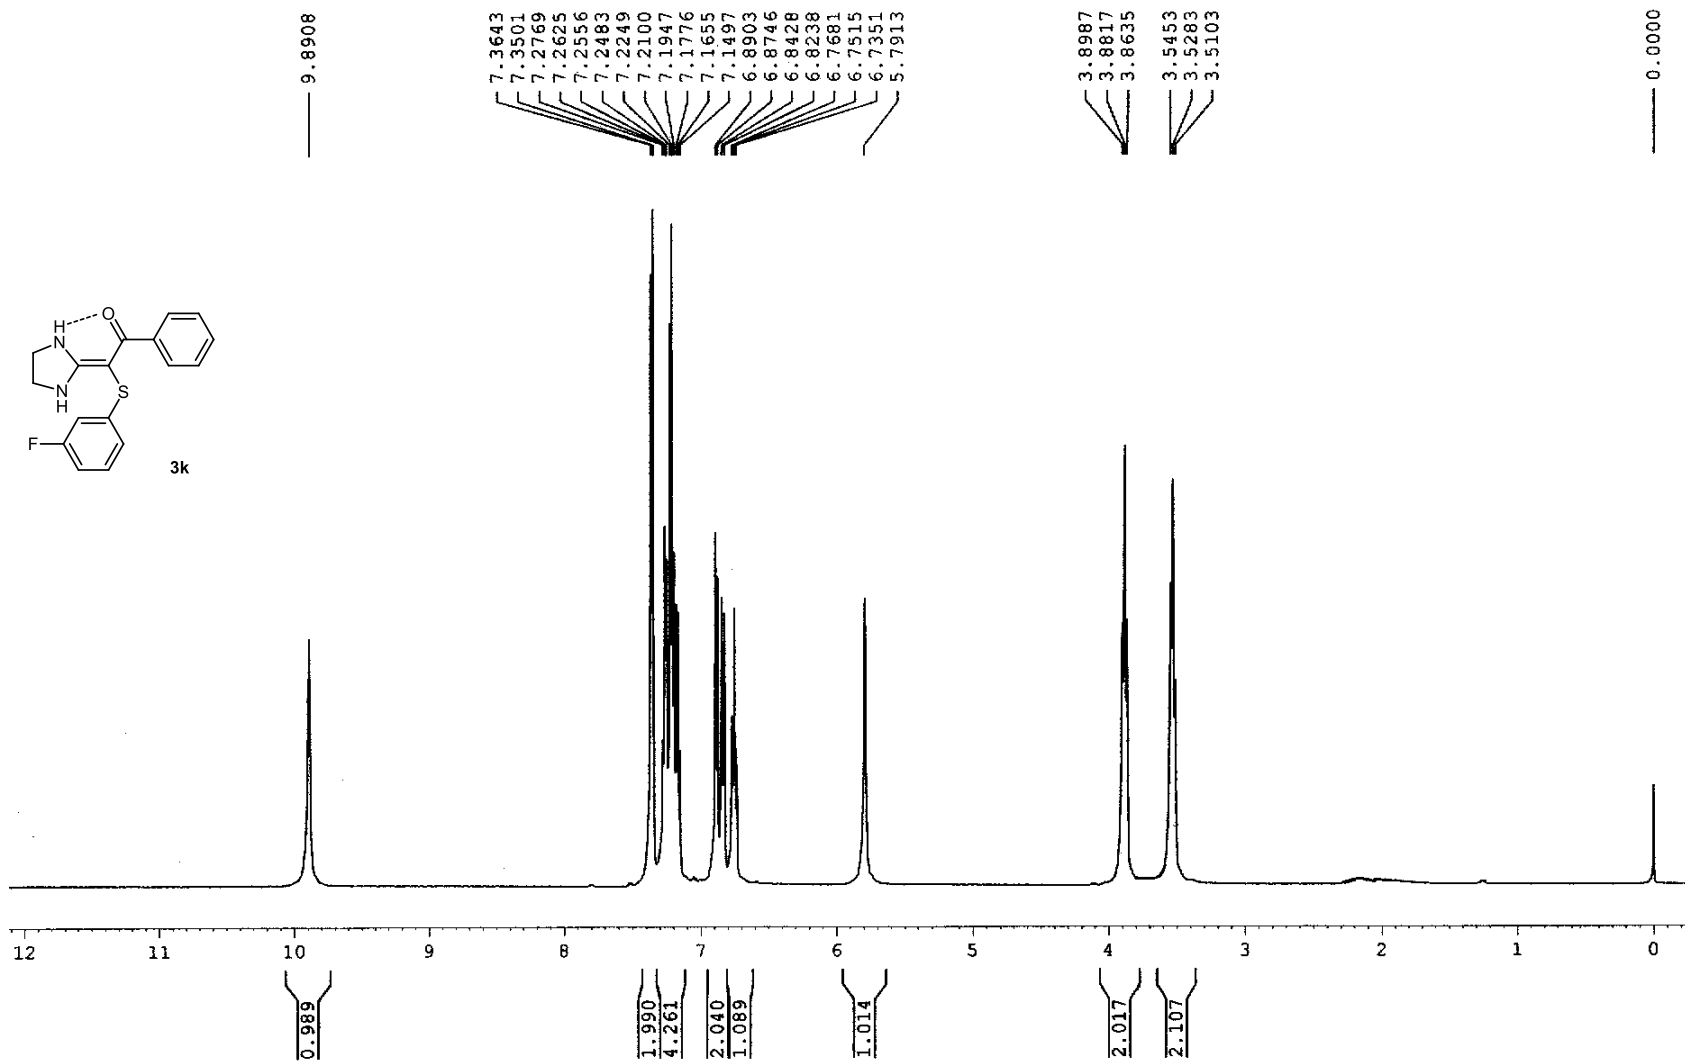

Figure S21  $^1\text{H}$  NMR spectrum (500 MHz,  $\text{CDCl}_3$ ) of compound **3k**

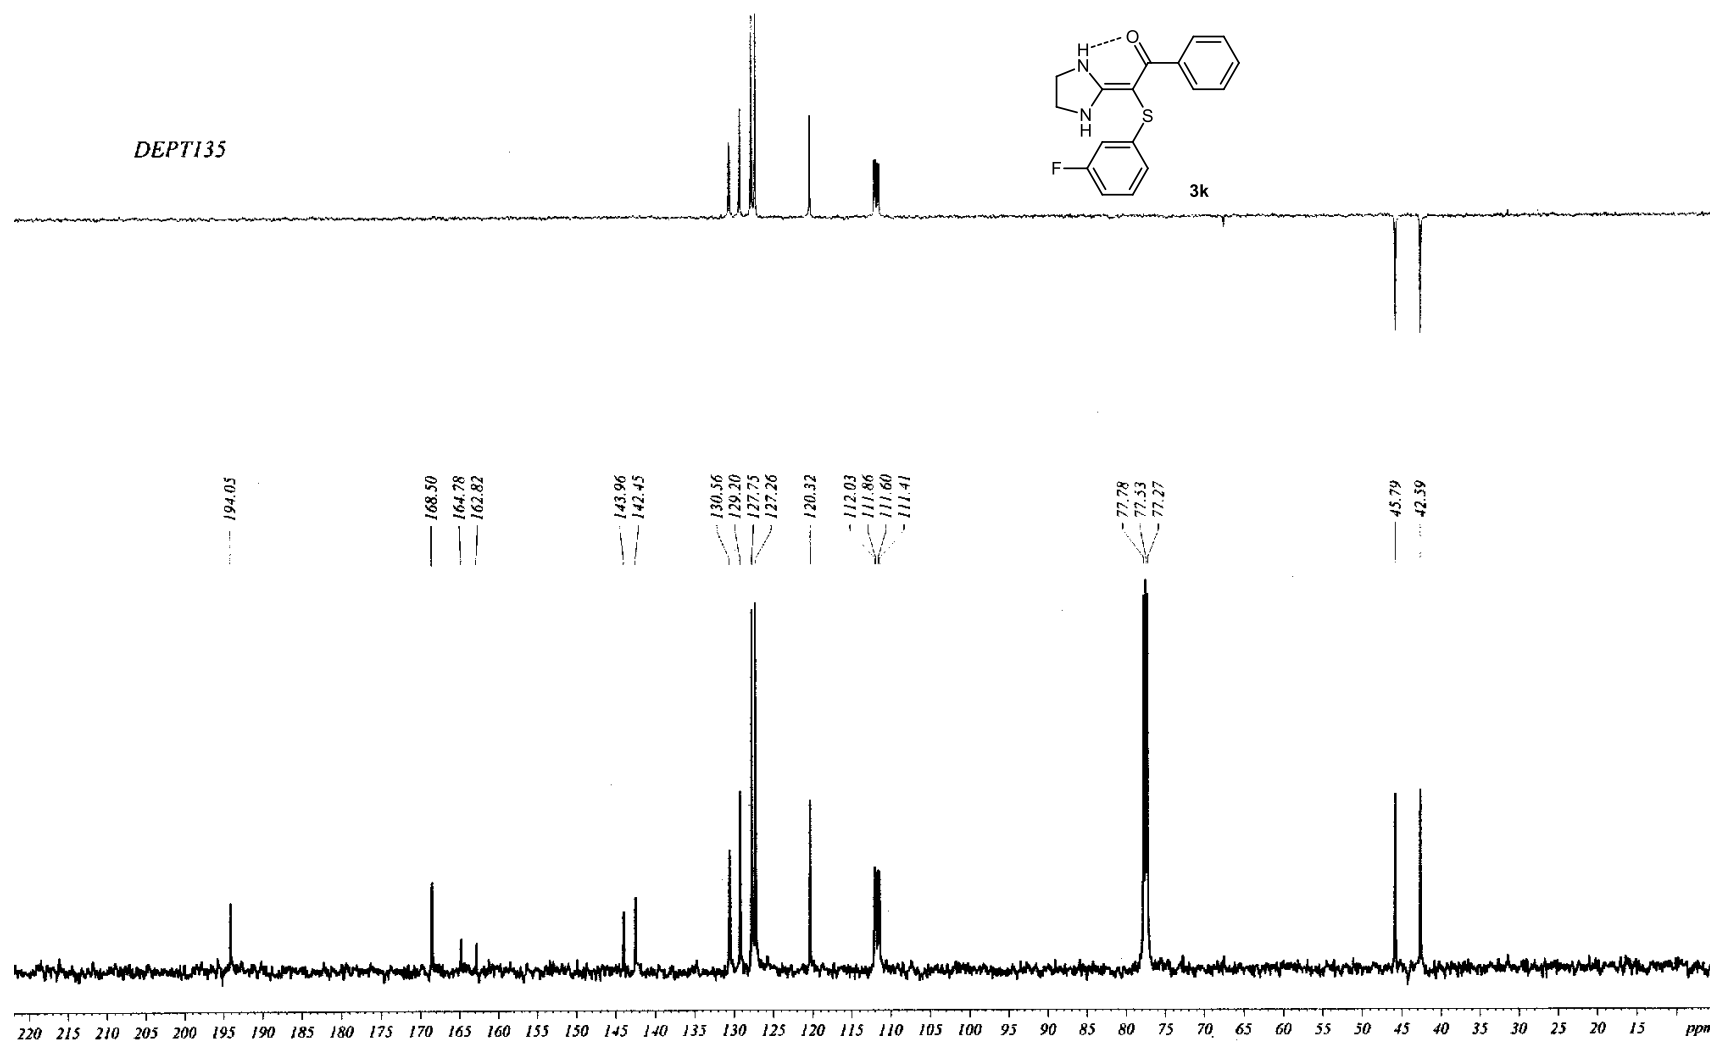

Figure S22  $^{13}\text{C}$  NMR spectrum (125 MHz,  $\text{CDCl}_3$ ) of compound **3k**

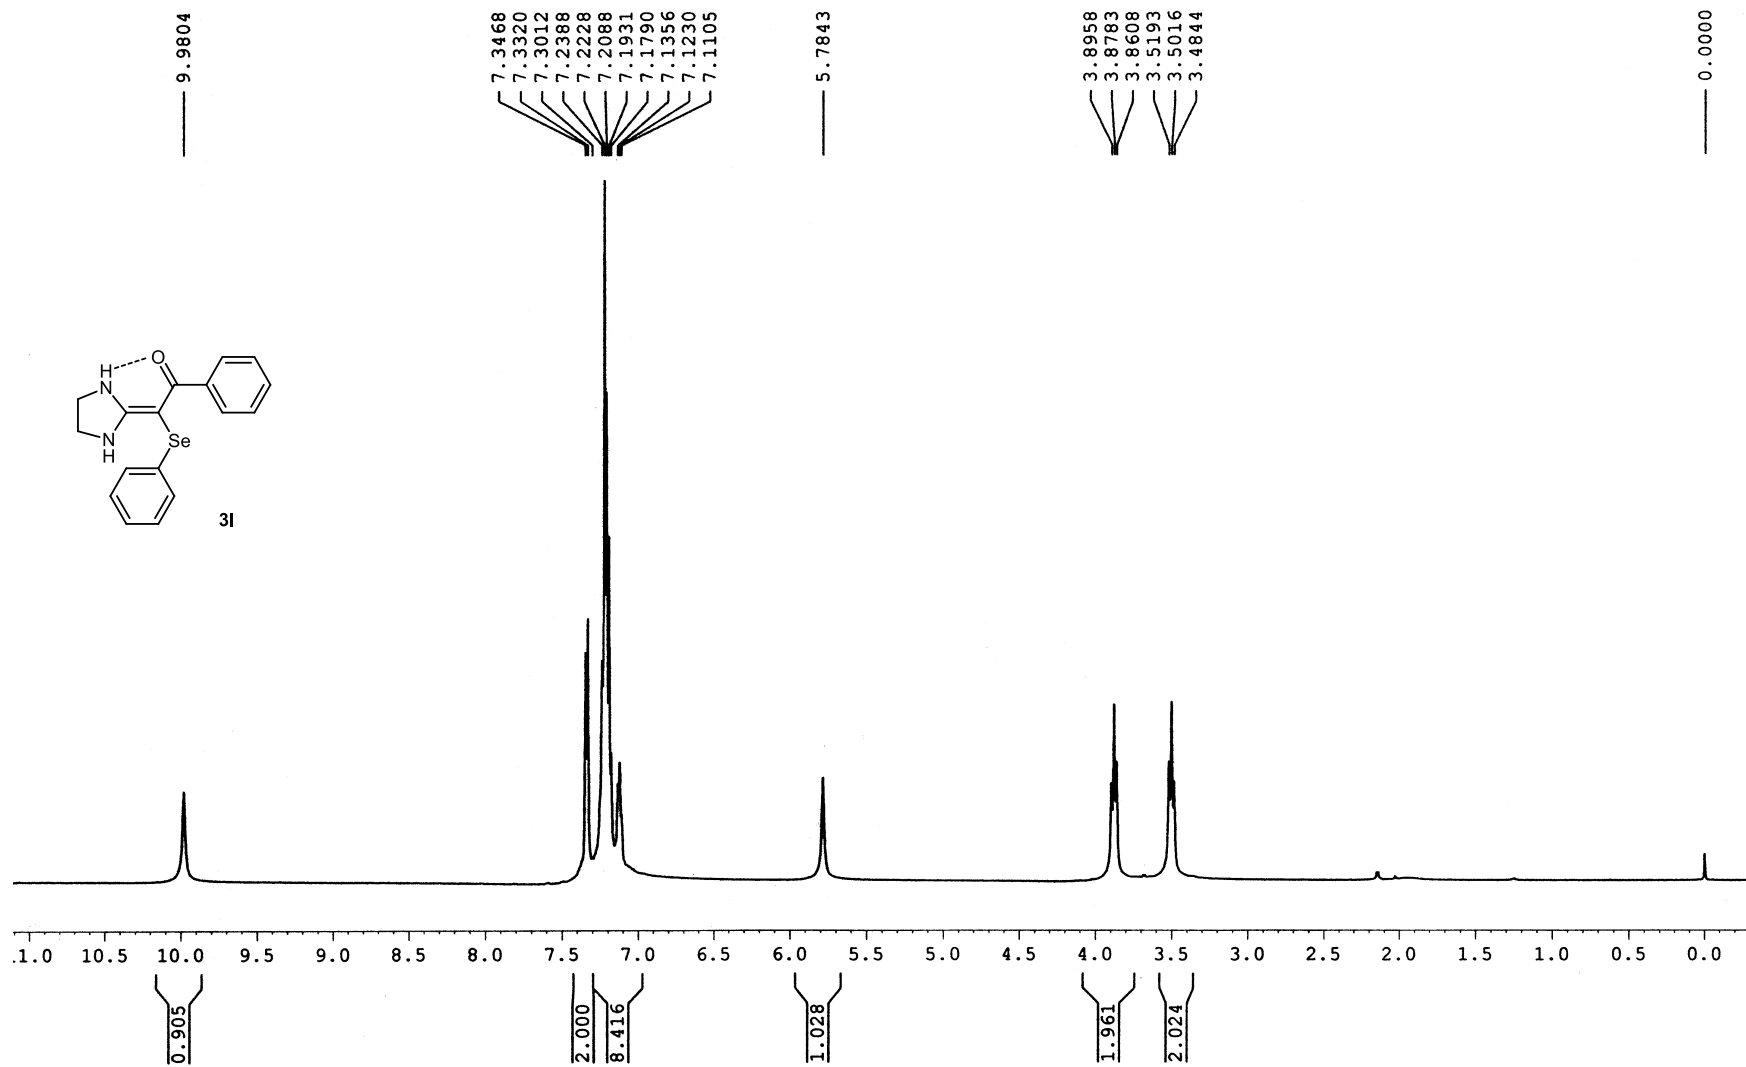

Figure S23  $^1\text{H}$  NMR spectrum (500 MHz,  $\text{CDCl}_3$ ) of compound **31**

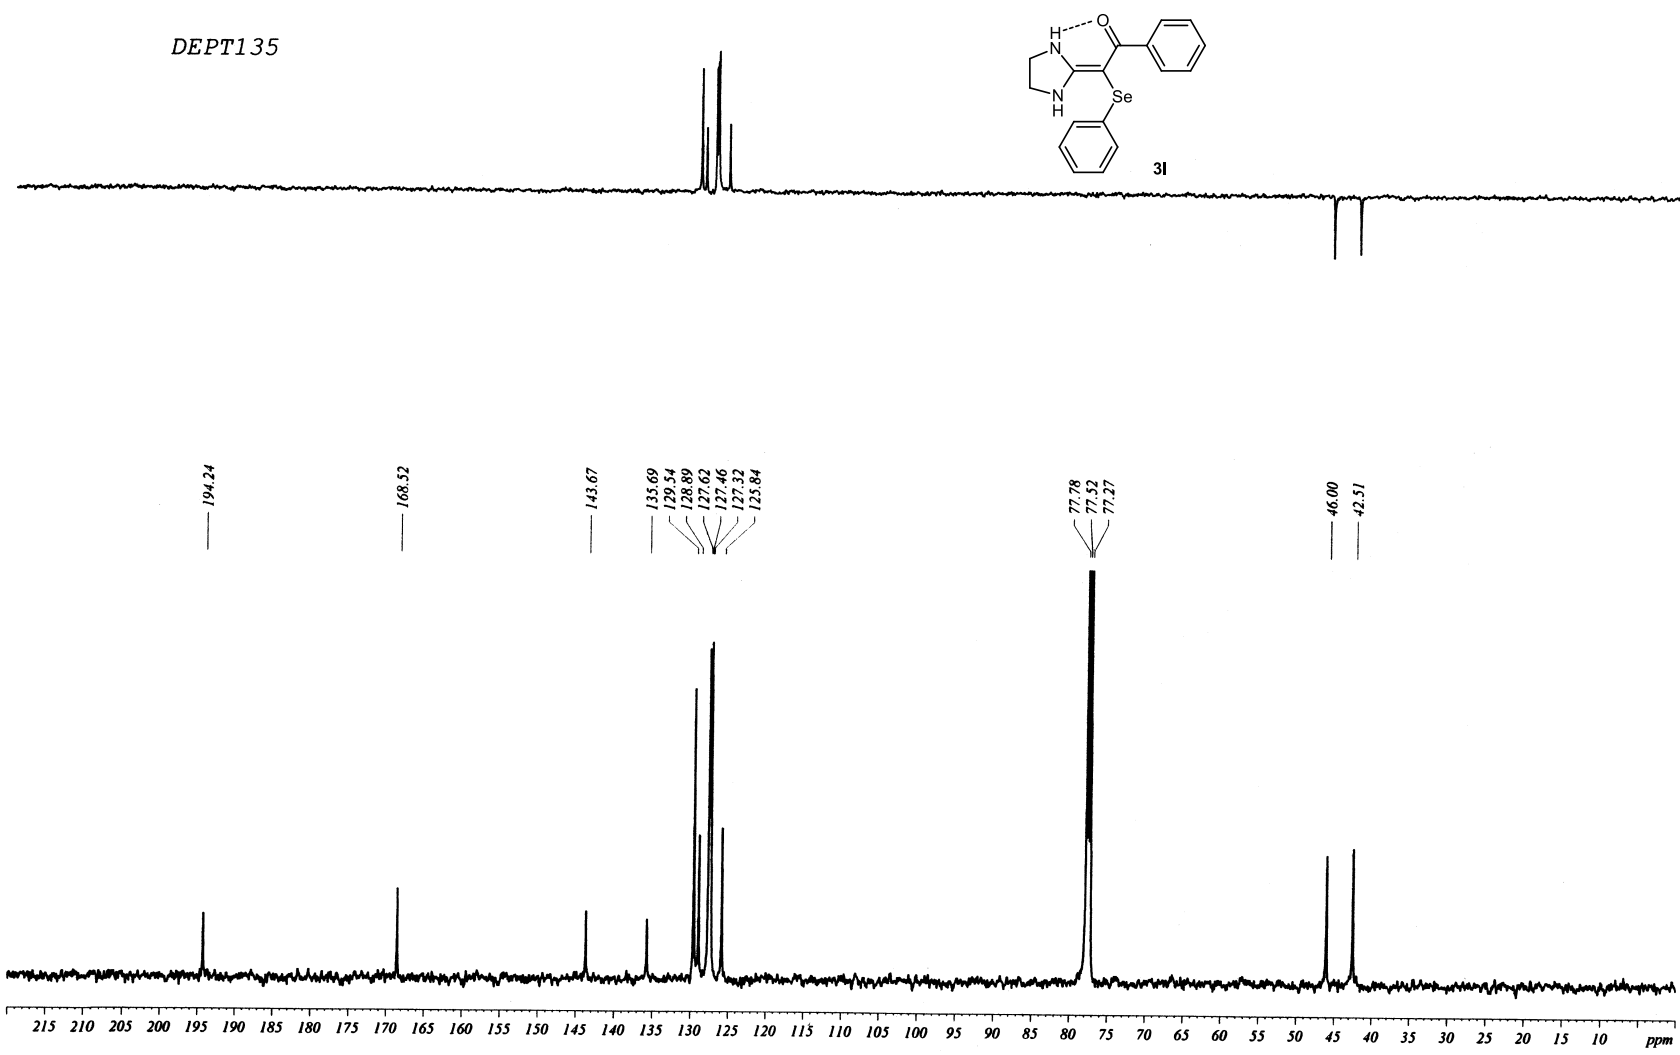

Figure S24  $^{13}\text{C}$  NMR spectrum (125 MHz,  $\text{CDCl}_3$ ) of compound **31**



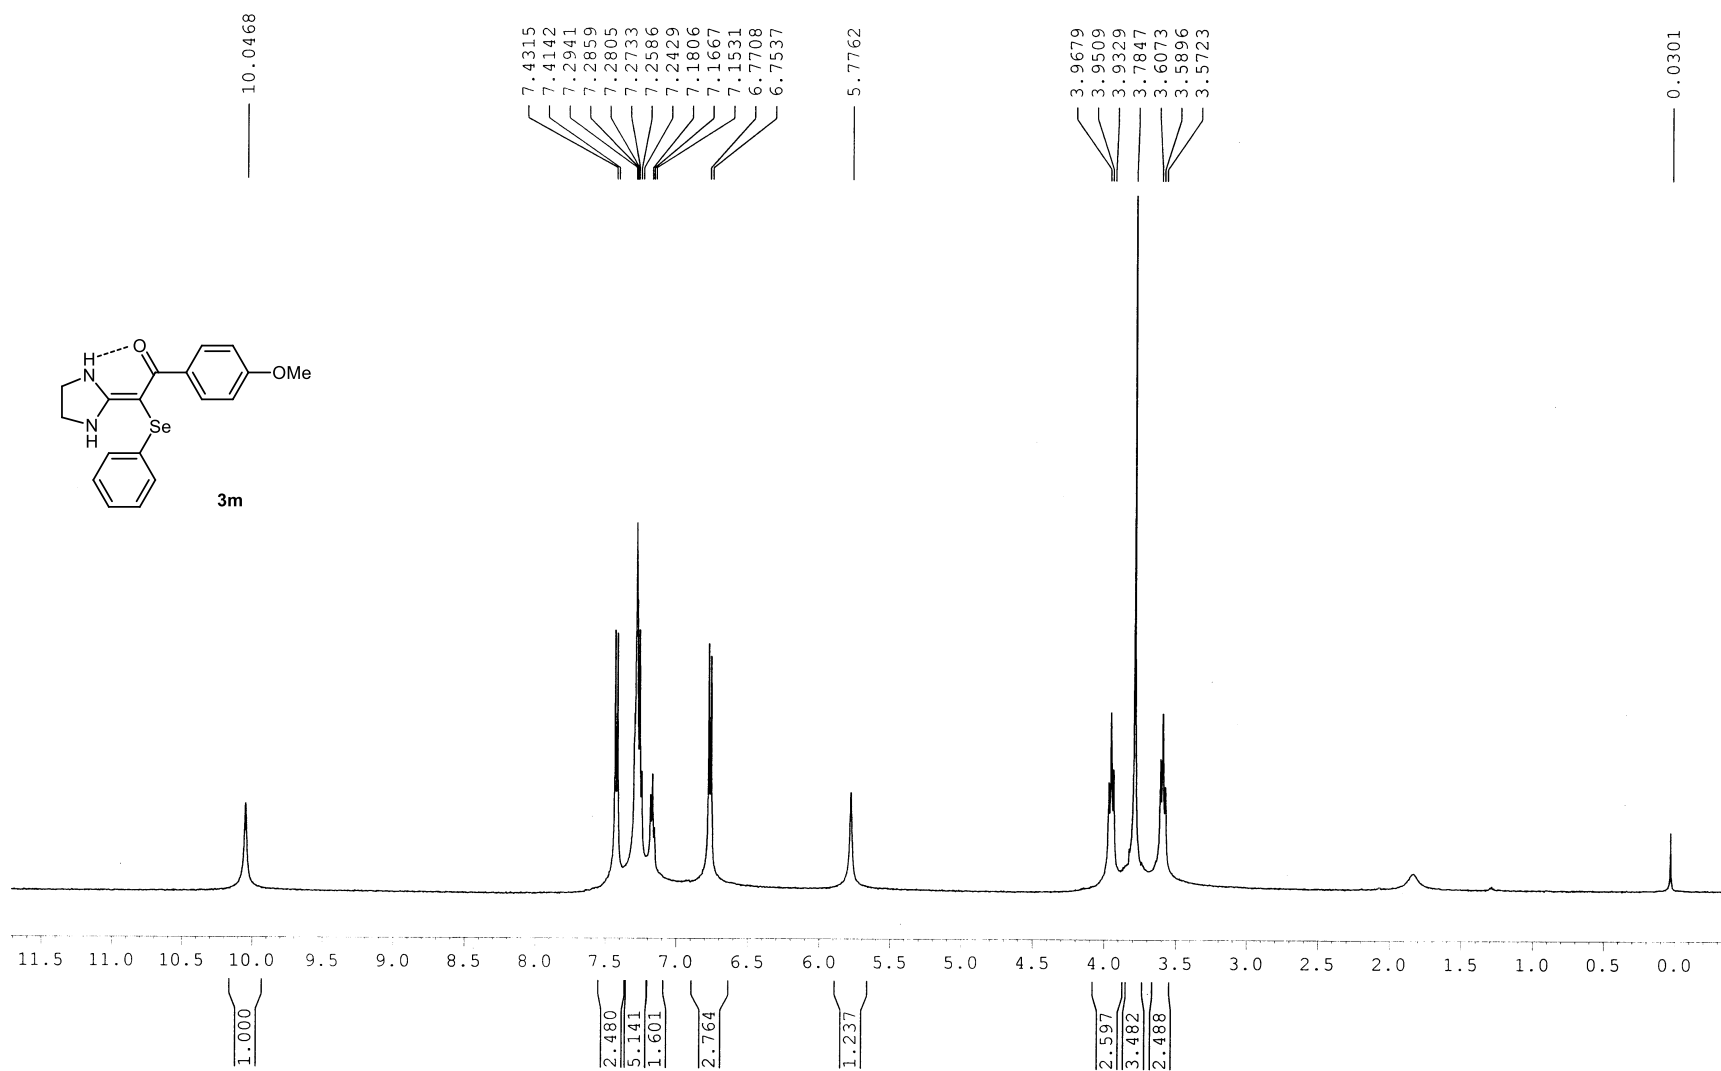

Figure S25  $^1\text{H NMR}$  spectrum (500 MHz,  $\text{CDCl}_3$ ) of compound **3m**

DEPT135

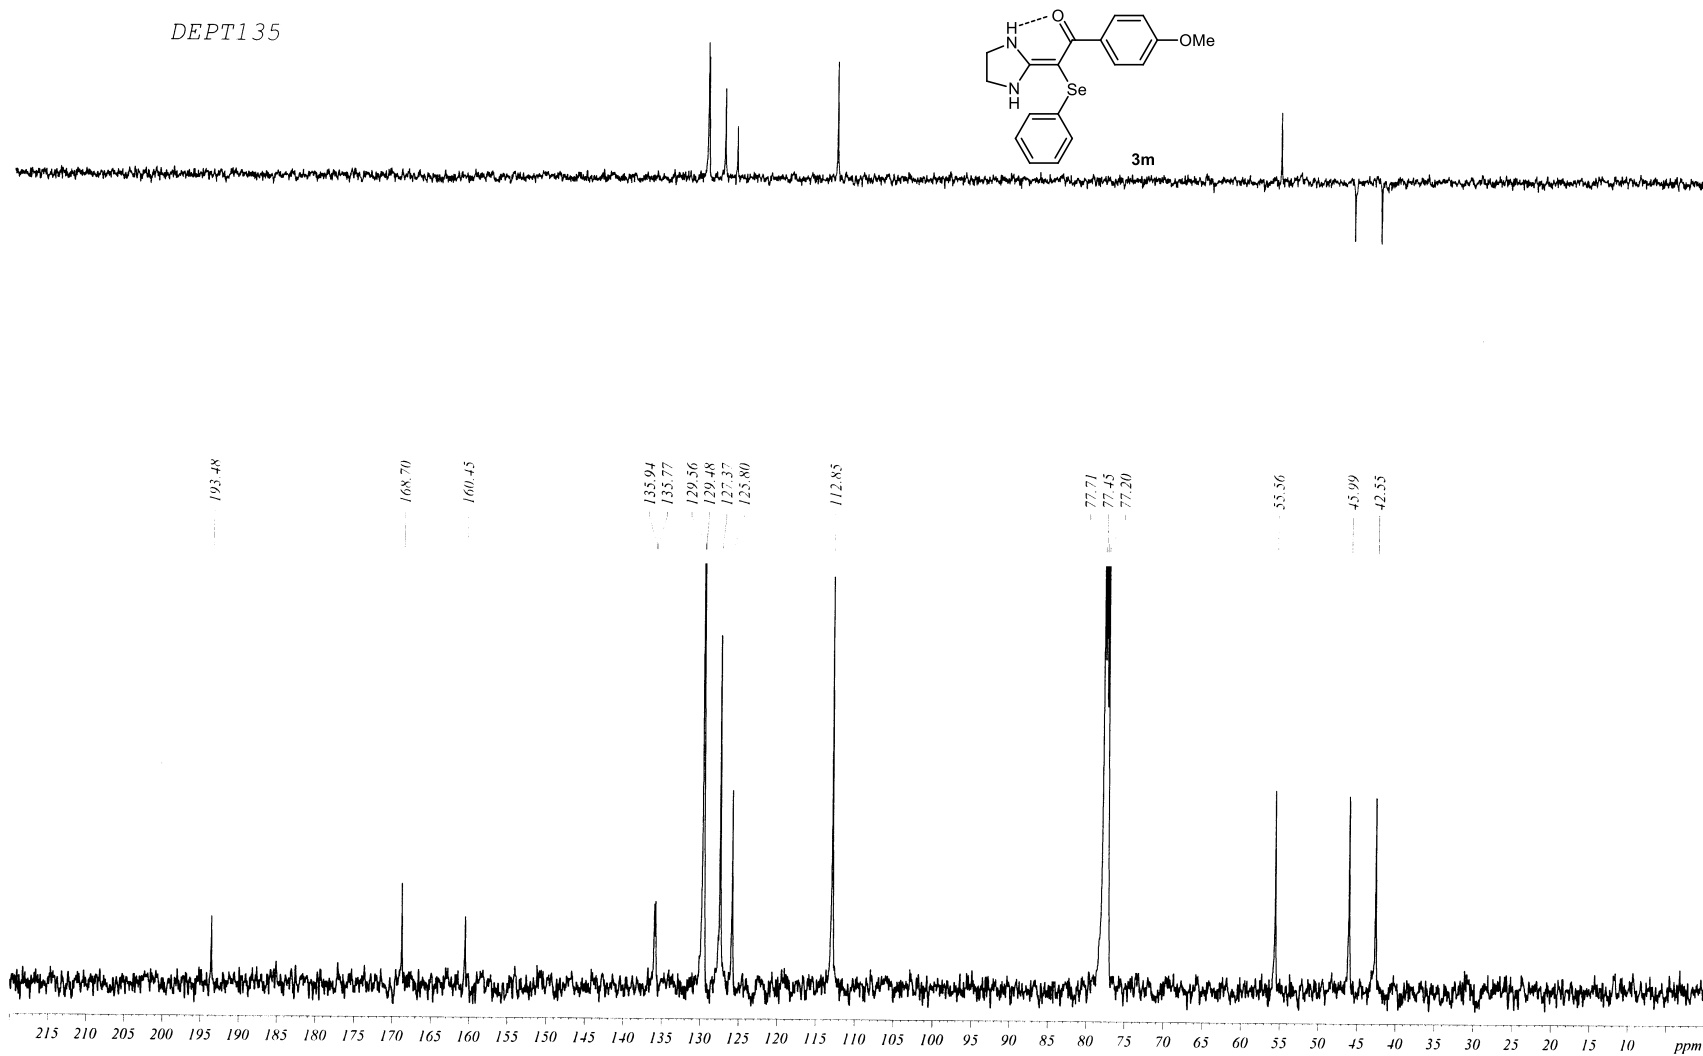

Figure S26 <sup>13</sup>C NMR spectrum (125 MHz, CDCl<sub>3</sub>) of compound **3m**

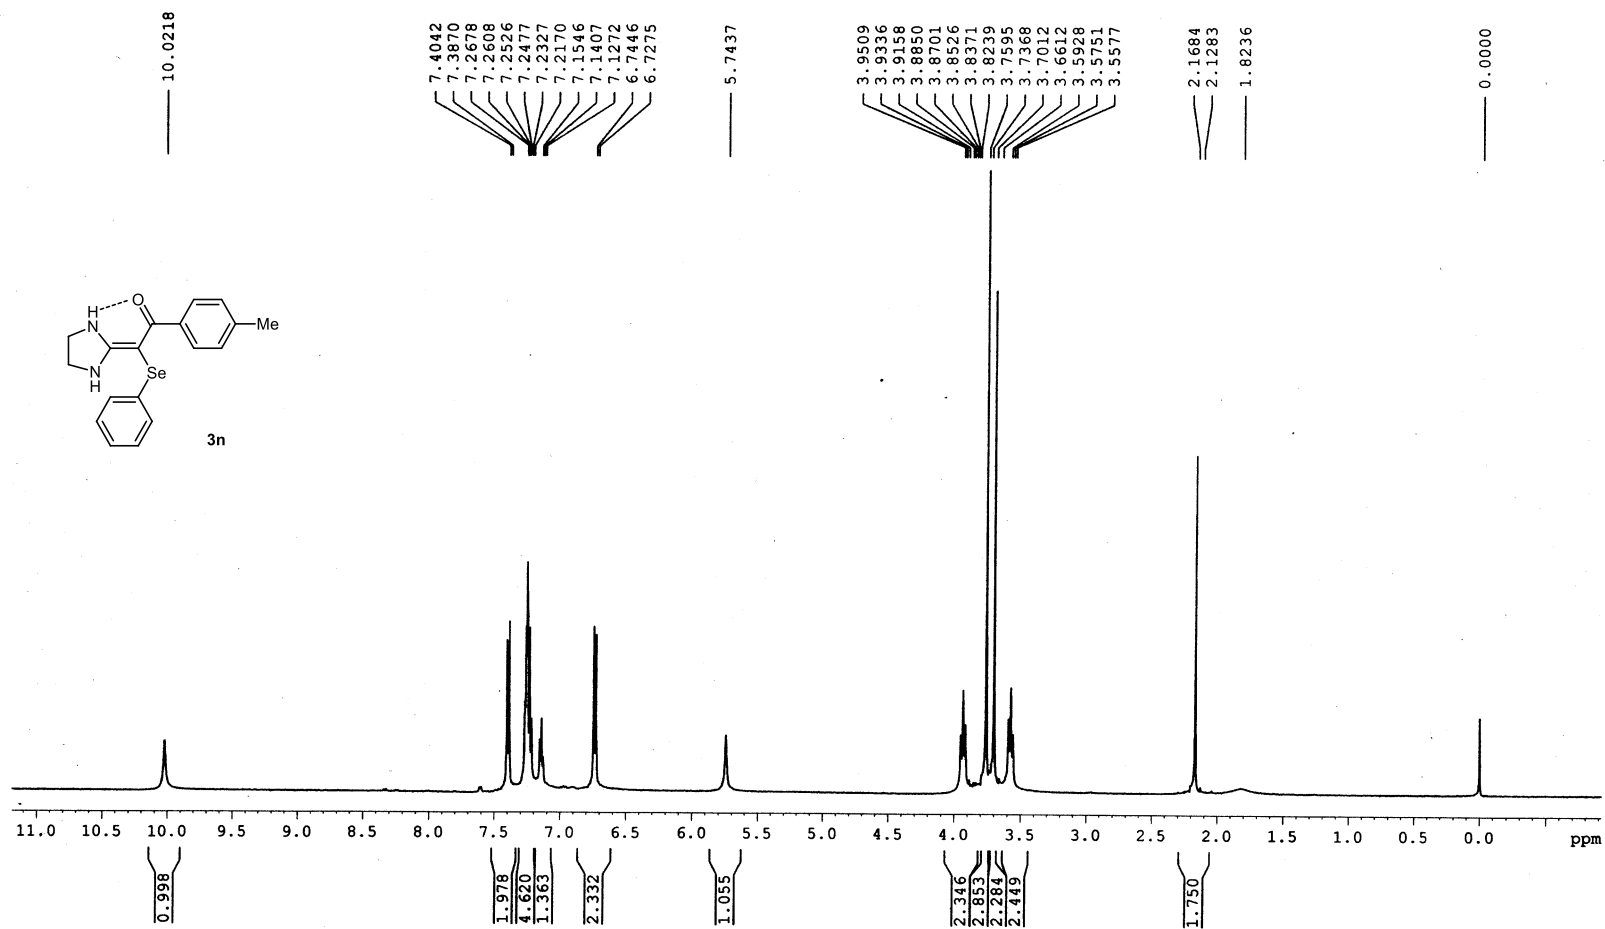

Figure S27  $^1\text{H}$  NMR spectrum (500 MHz,  $\text{CDCl}_3$ ) of compound **3n**

DEPT135

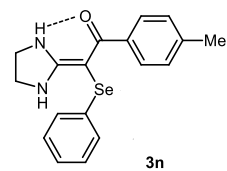

YUNNAN UNIVER. AV. DRX500  
jiangxiuyang JXY-15 in CDCl3  
13050604

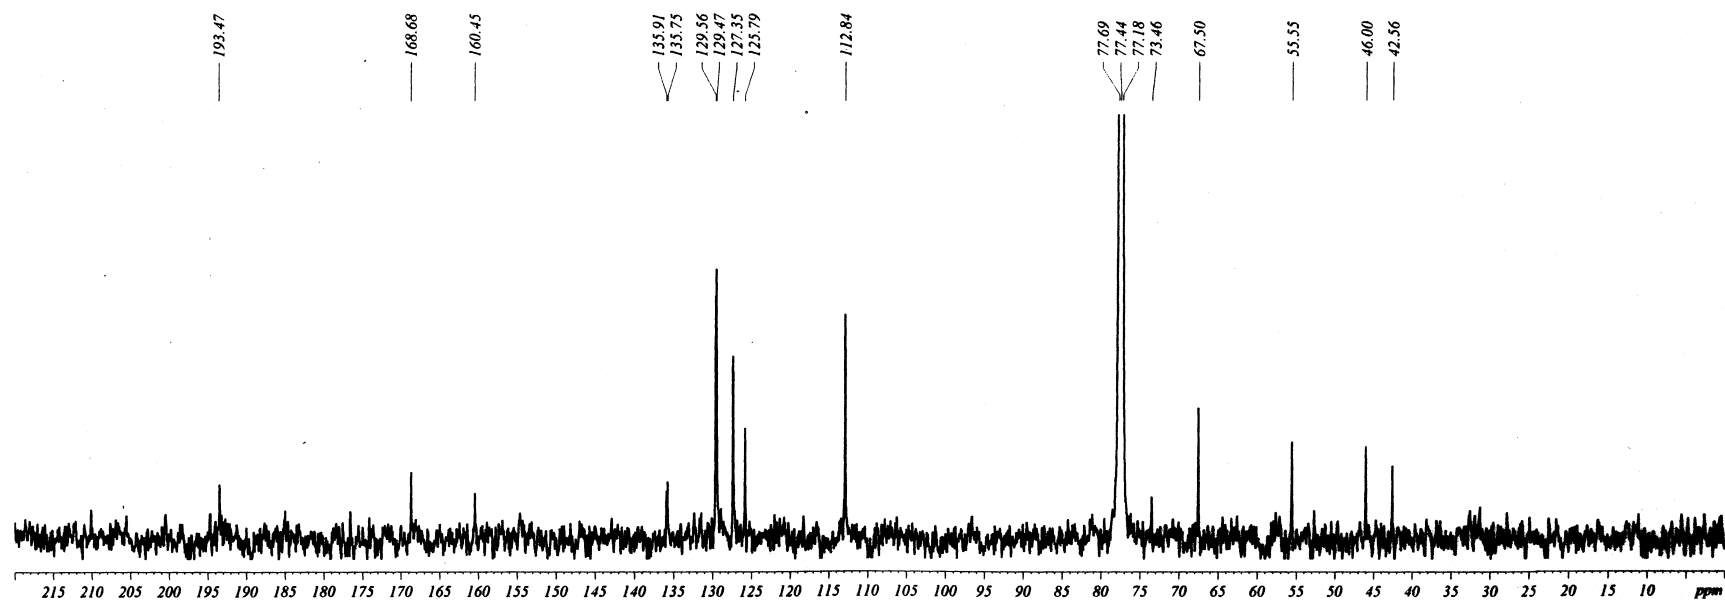

Figure S28 <sup>13</sup>C NMR spectrum (125 MHz, DMSO-d<sub>6</sub>) of compound 3n

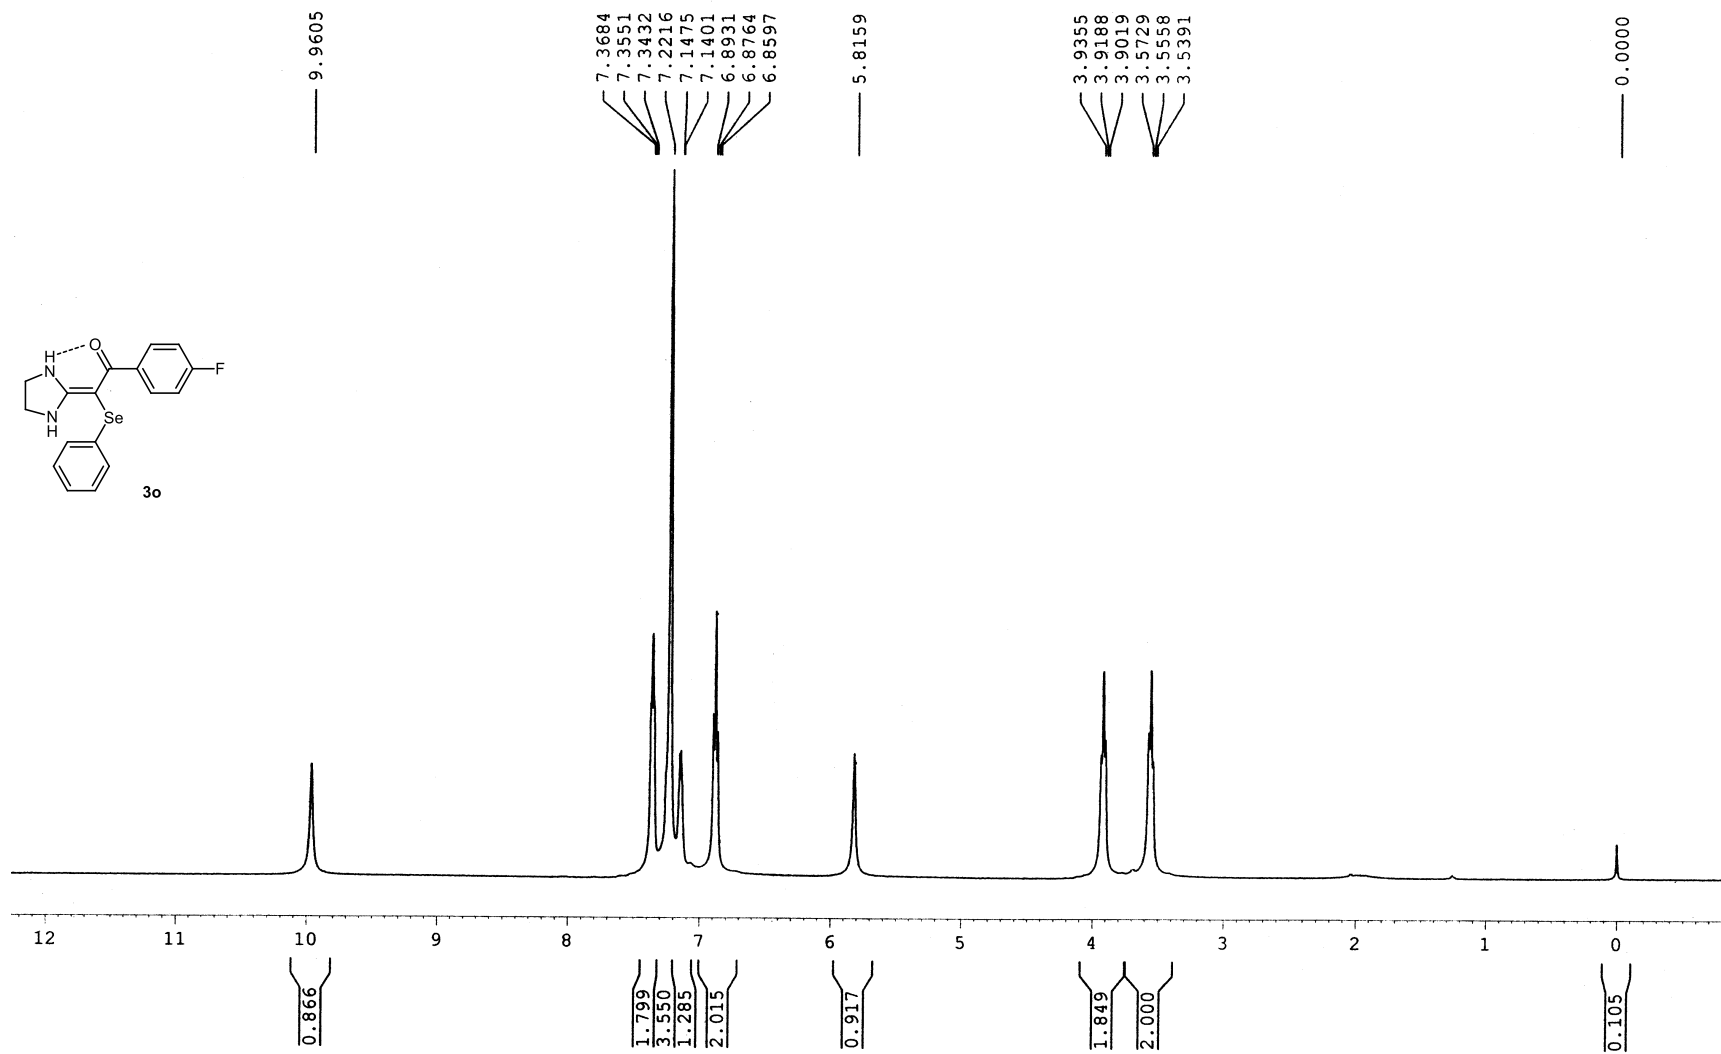

Figure S29  $^1\text{H NMR}$  spectrum (500 MHz,  $\text{CDCl}_3$ ) of compound **3o**

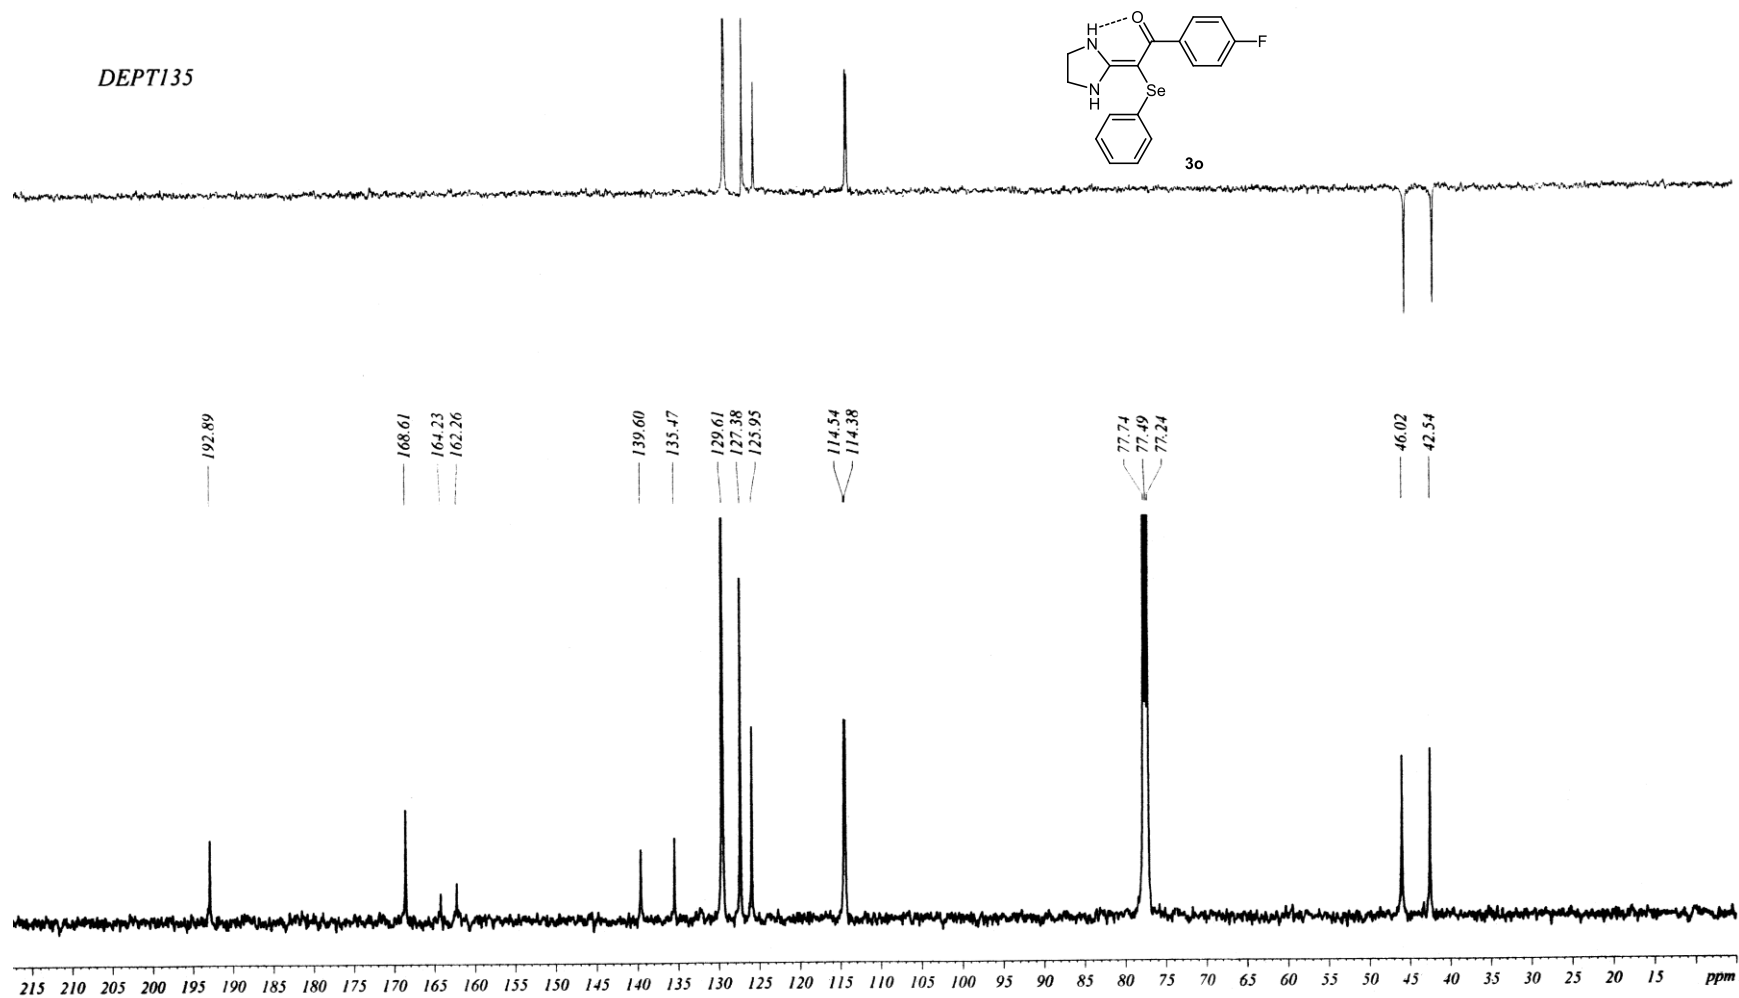

Figure S30  $^{13}\text{C}$  NMR spectrum (125 MHz,  $\text{CDCl}_3$ ) of compound **3o**

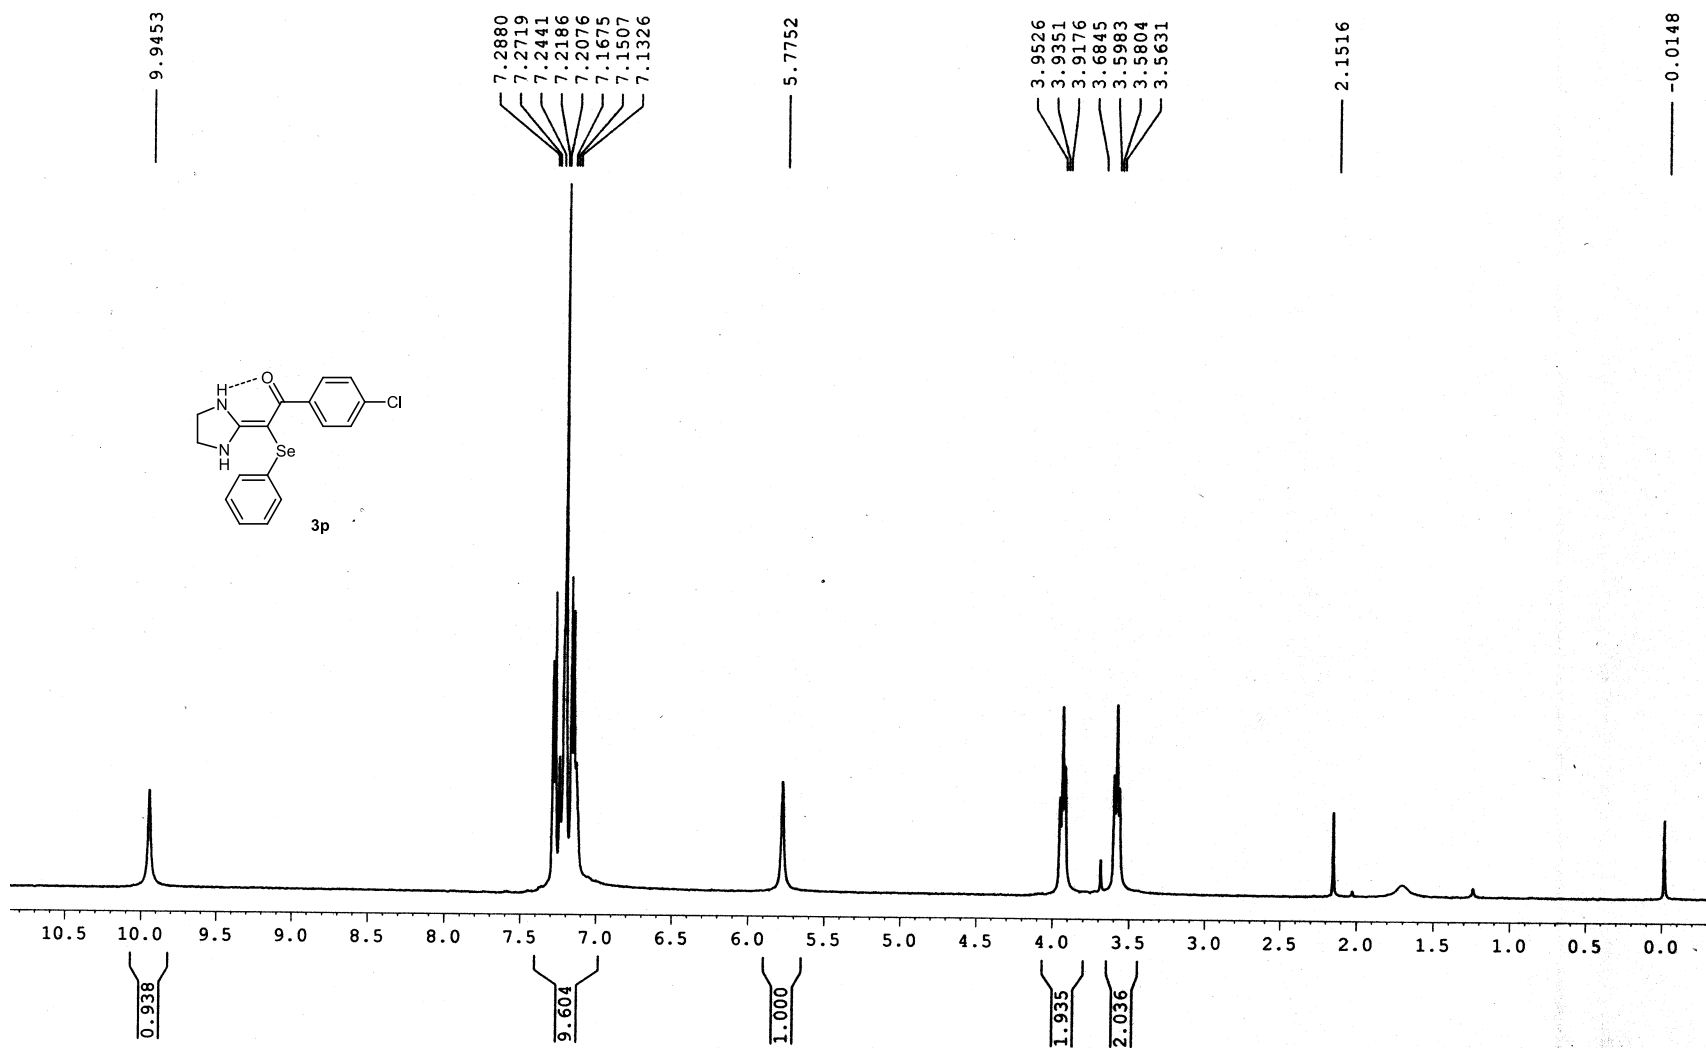

Figure S31  $^1\text{H}$  NMR spectrum (500 MHz,  $\text{CDCl}_3$ ) of compound **3p**

DEPT135

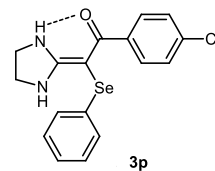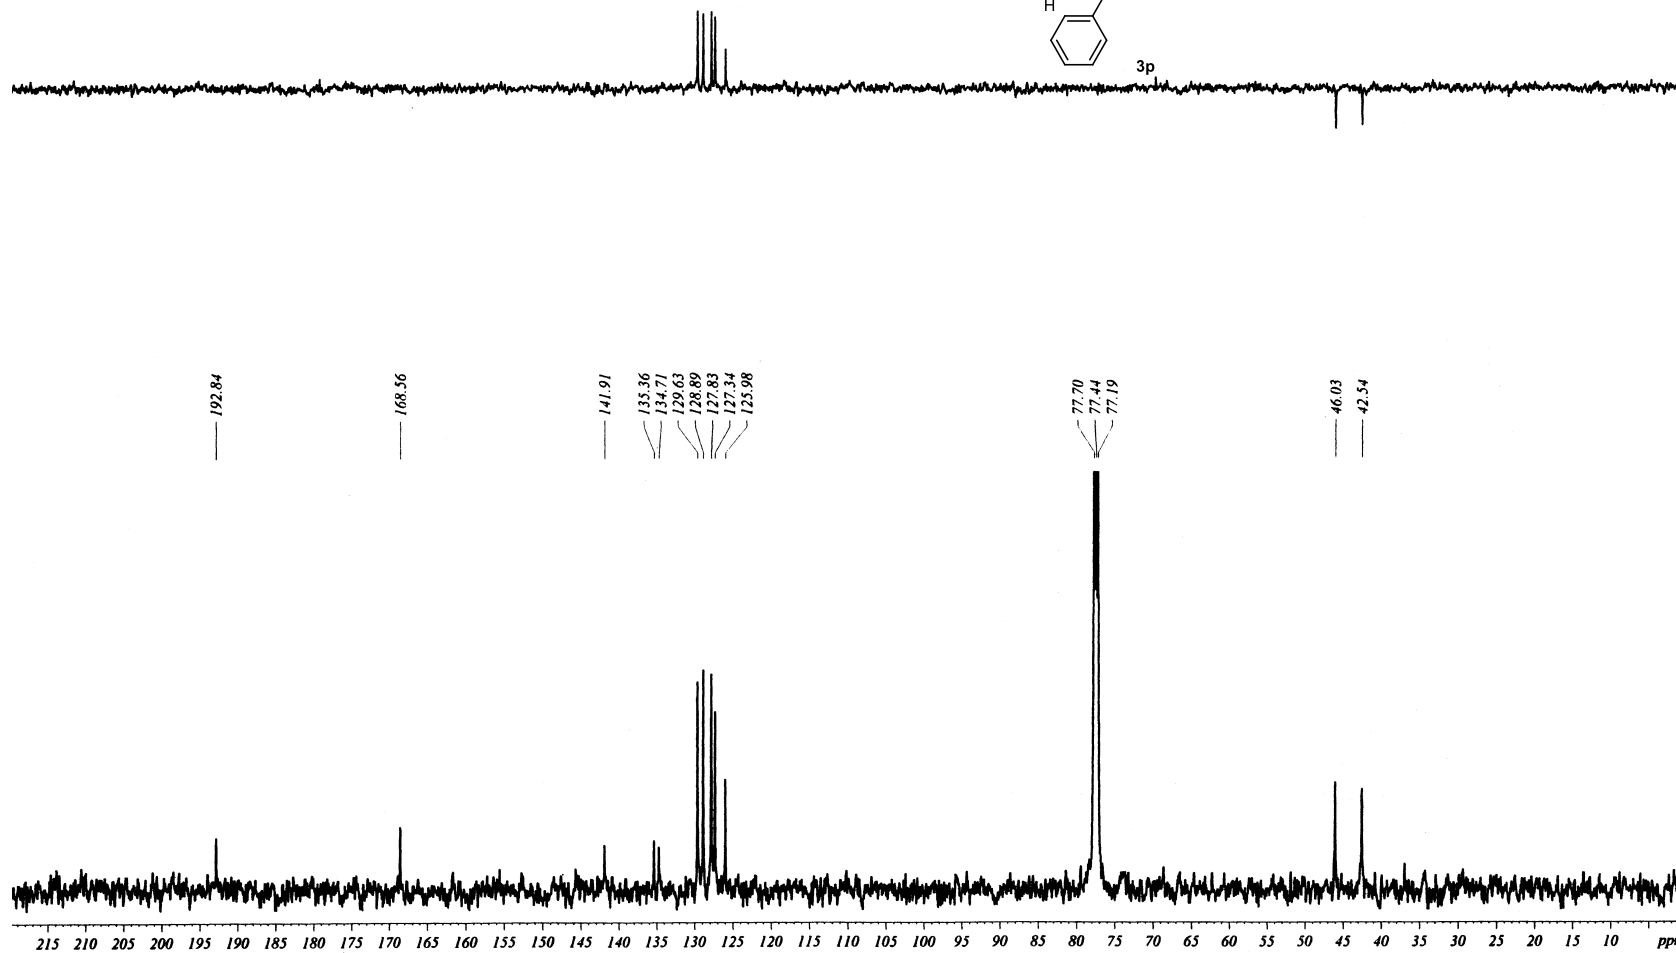

Figure S32  $^{13}\text{C}$  NMR spectrum (125 MHz,  $\text{CDCl}_3$ ) of compound **3p**



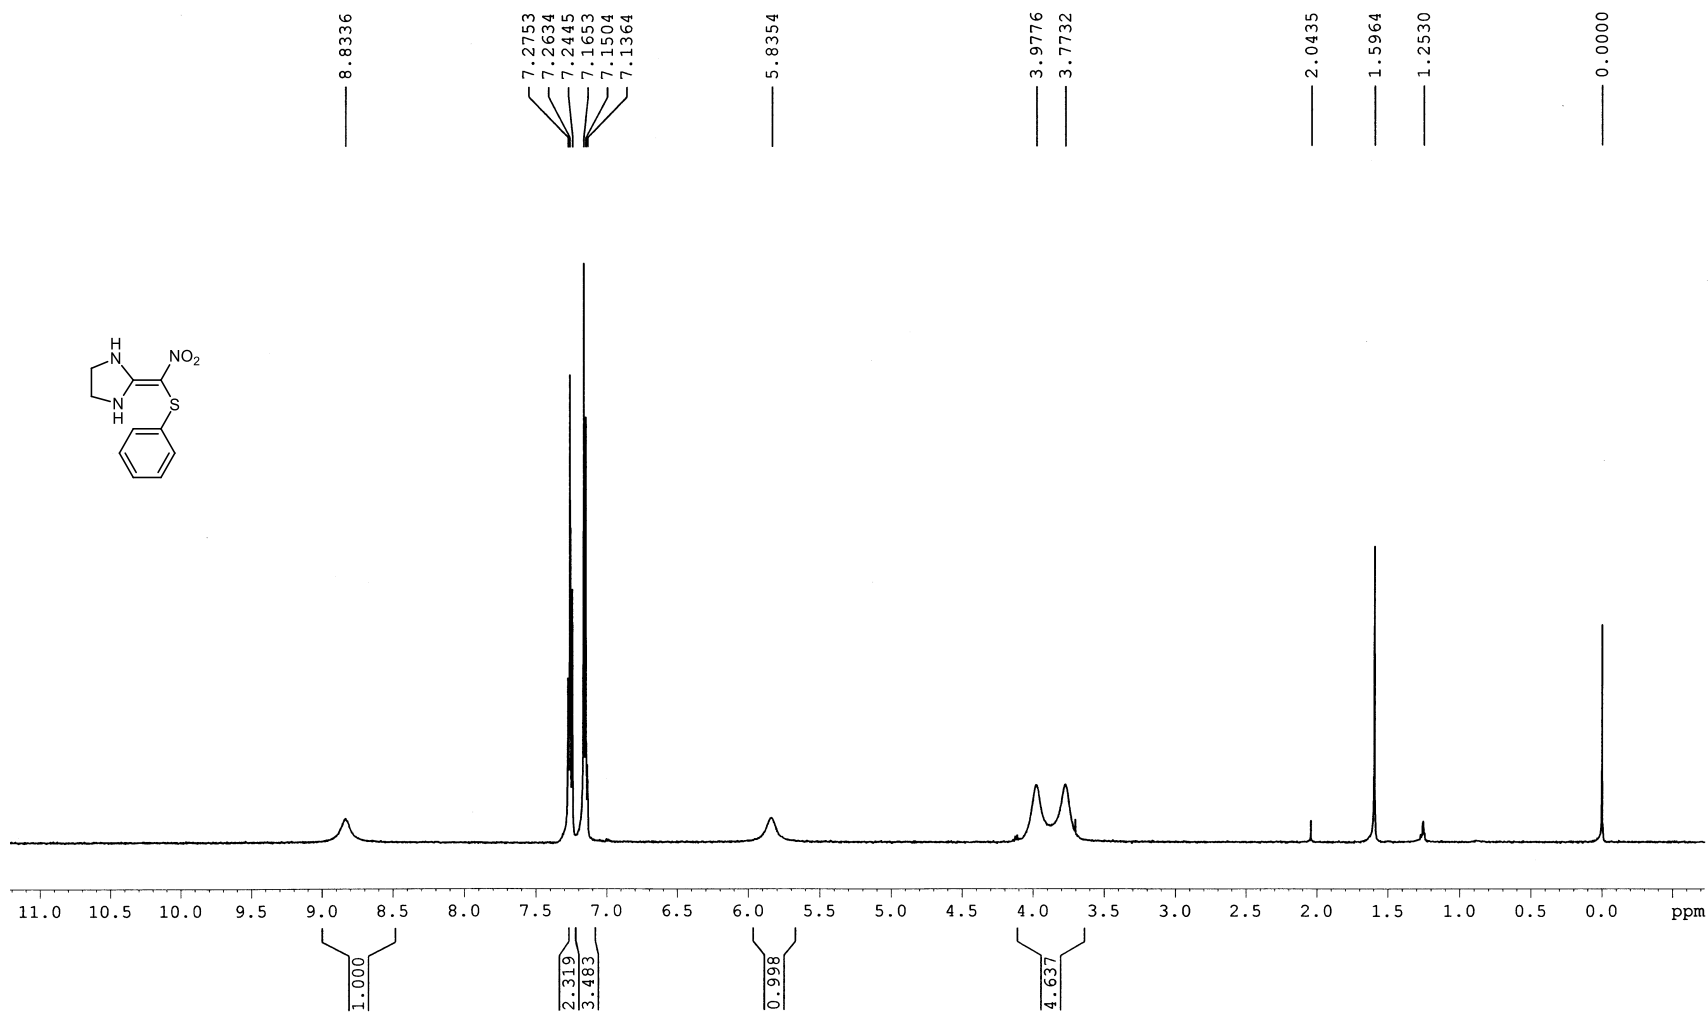

Figure S33 <sup>1</sup>H NMR spectrum (500 MHz, CDCl<sub>3</sub>) of compound **3q**

DEPT135

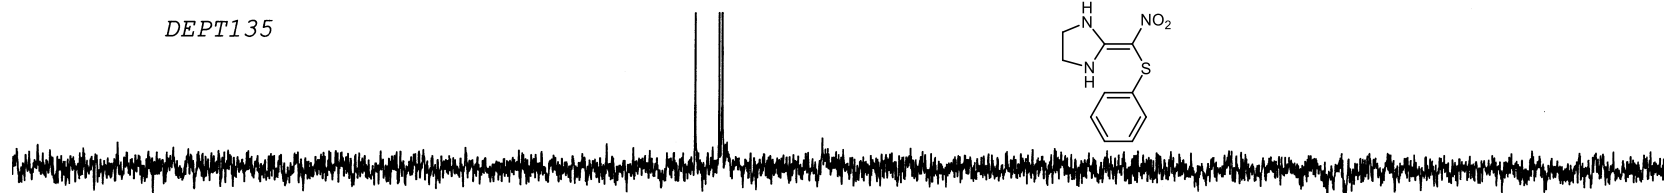

YUNNAN UNIVER. AV. DRX 500  
jiangxiuyang JXY-N5 in CDCL3  
14051301

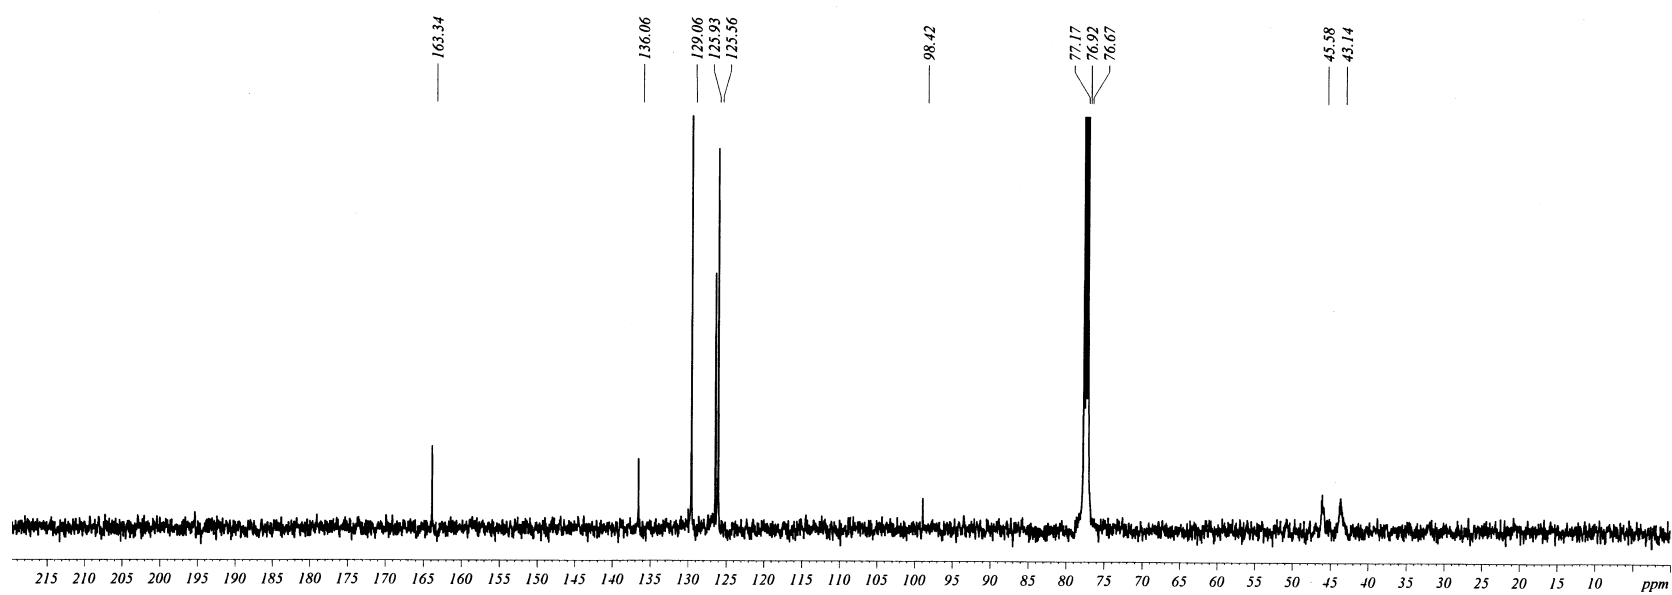

Figure S34  $^{13}\text{C}$  NMR spectrum (125 MHz,  $\text{CDCl}_3$ ) of compound **3q**

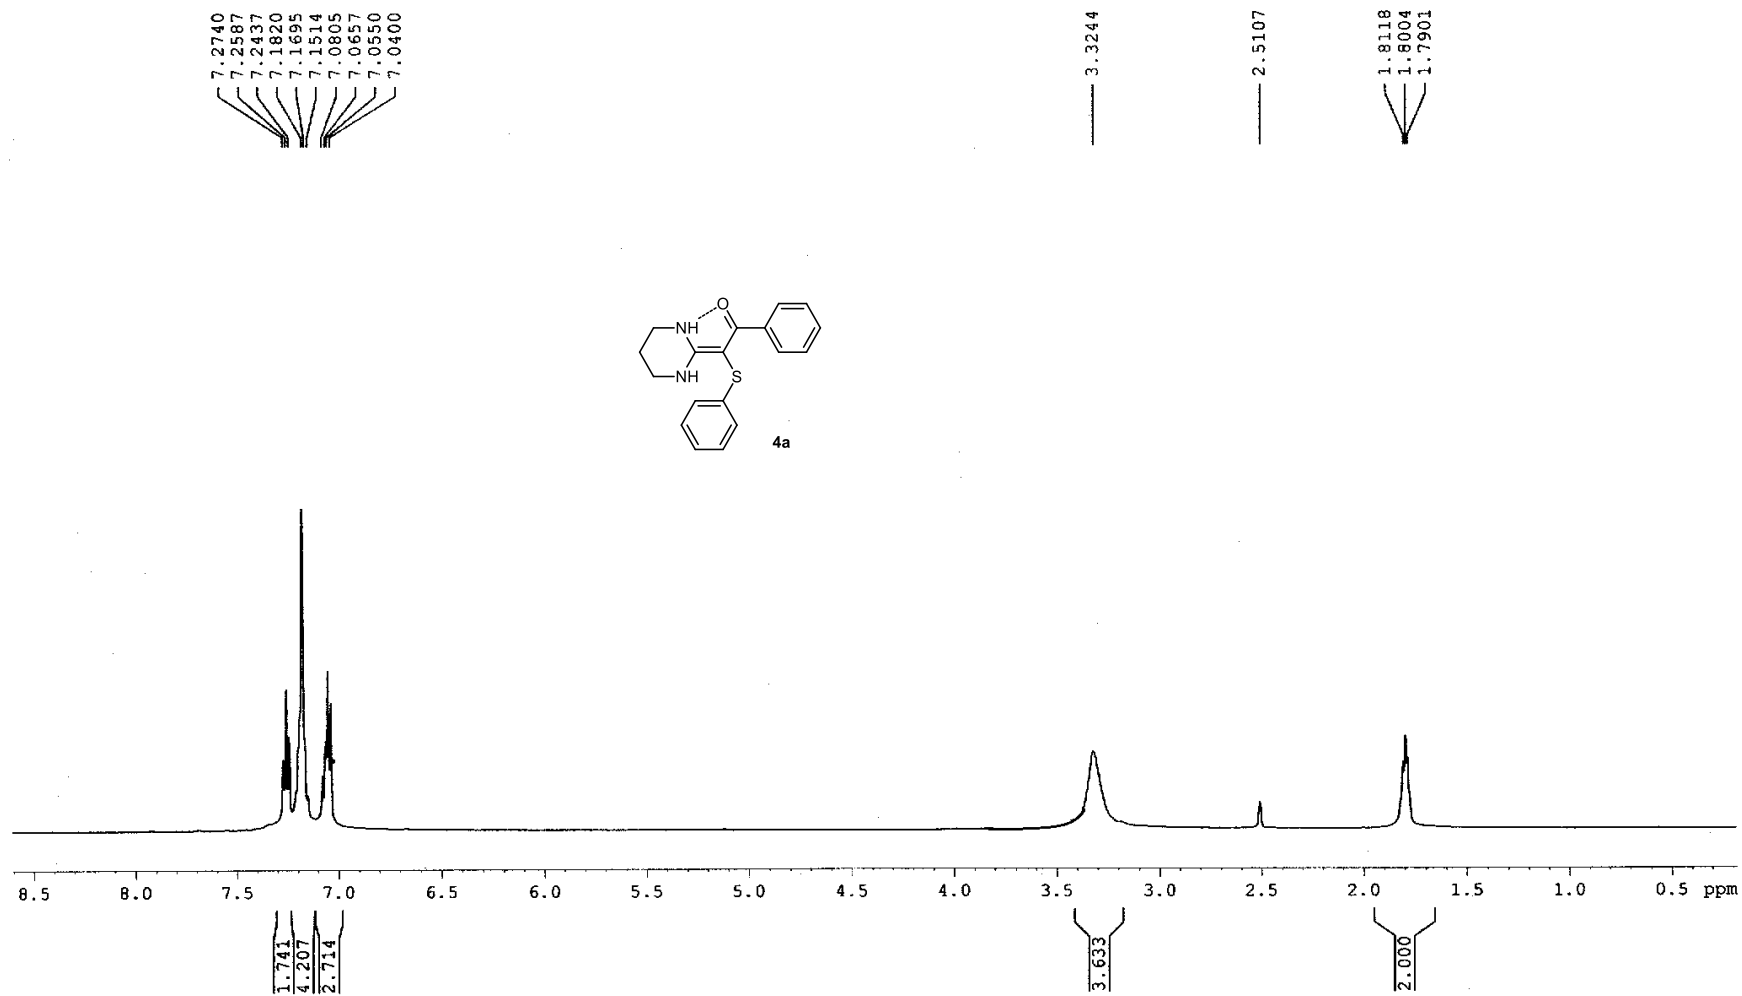

Figure S35 <sup>1</sup>H NMR spectrum (500 MHz, DMSO-*d*<sub>6</sub>) of compound **4a**

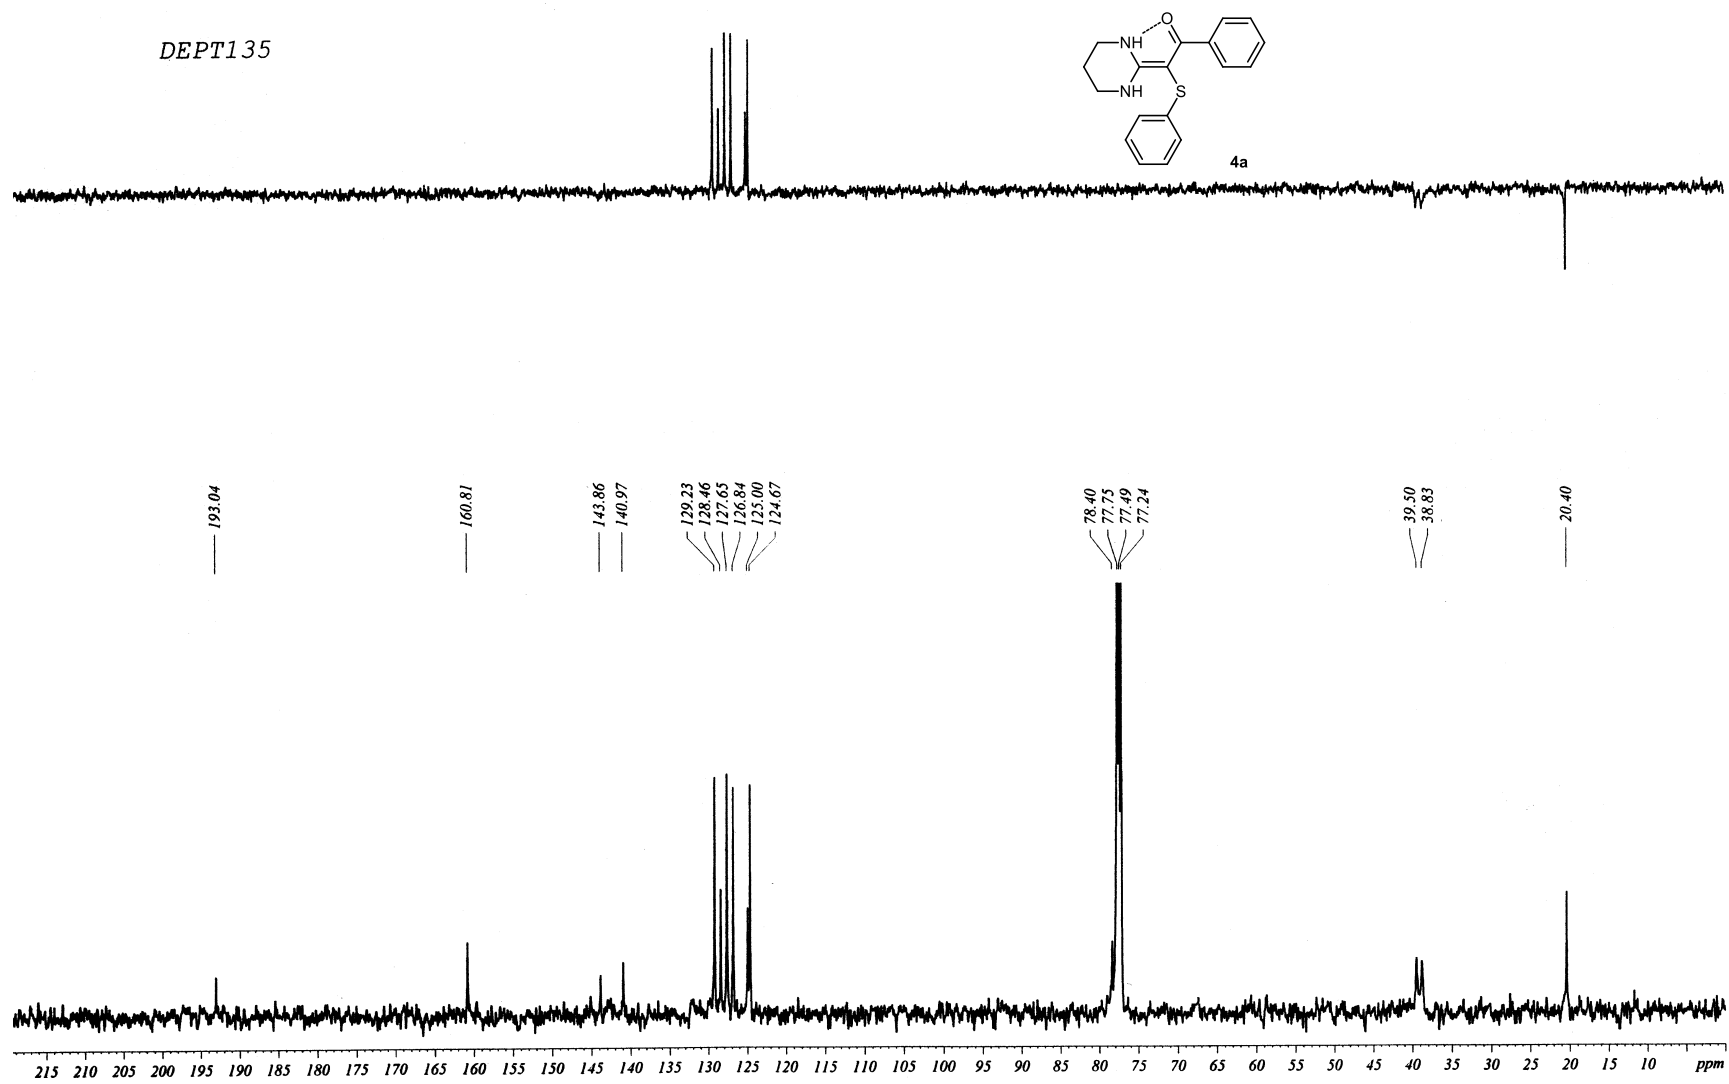

Figure S36  $^{13}\text{C}$  NMR spectrum (125 MHz,  $\text{CDCl}_3$ ) of compound 4a

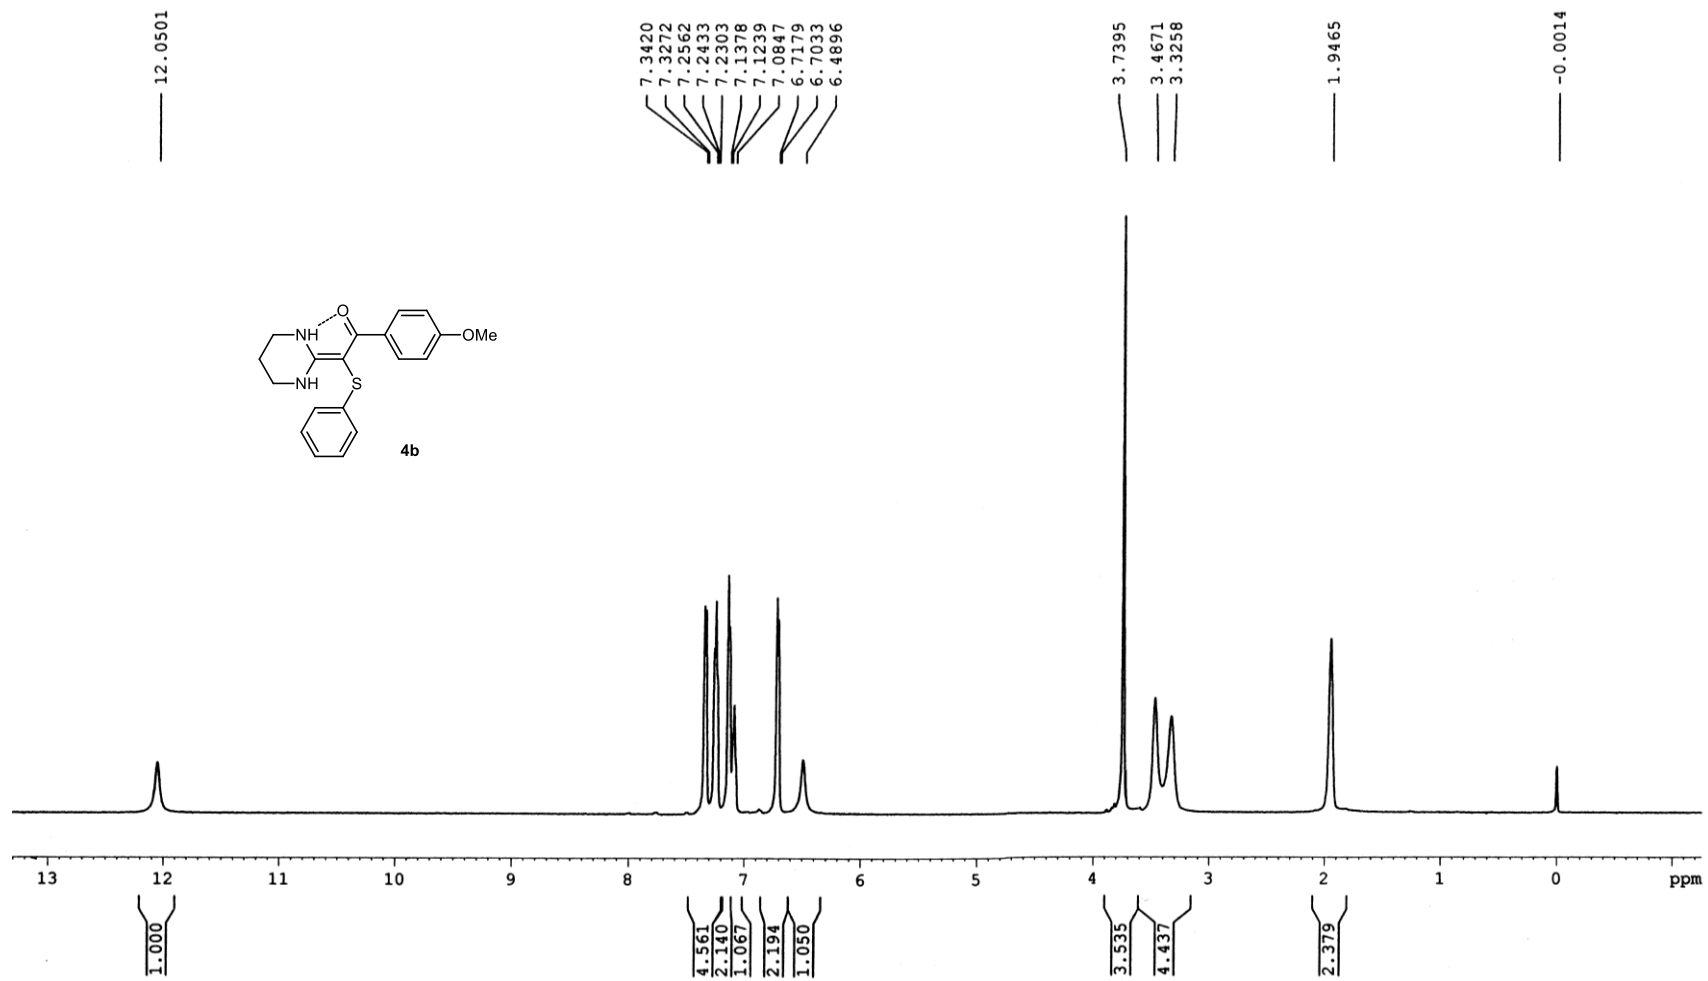

Figure S37  $^1\text{H}$  NMR spectrum (500 MHz,  $\text{CDCl}_3$ ) of compound **4b**

DEPT135

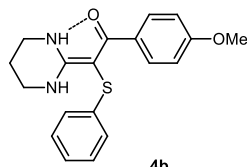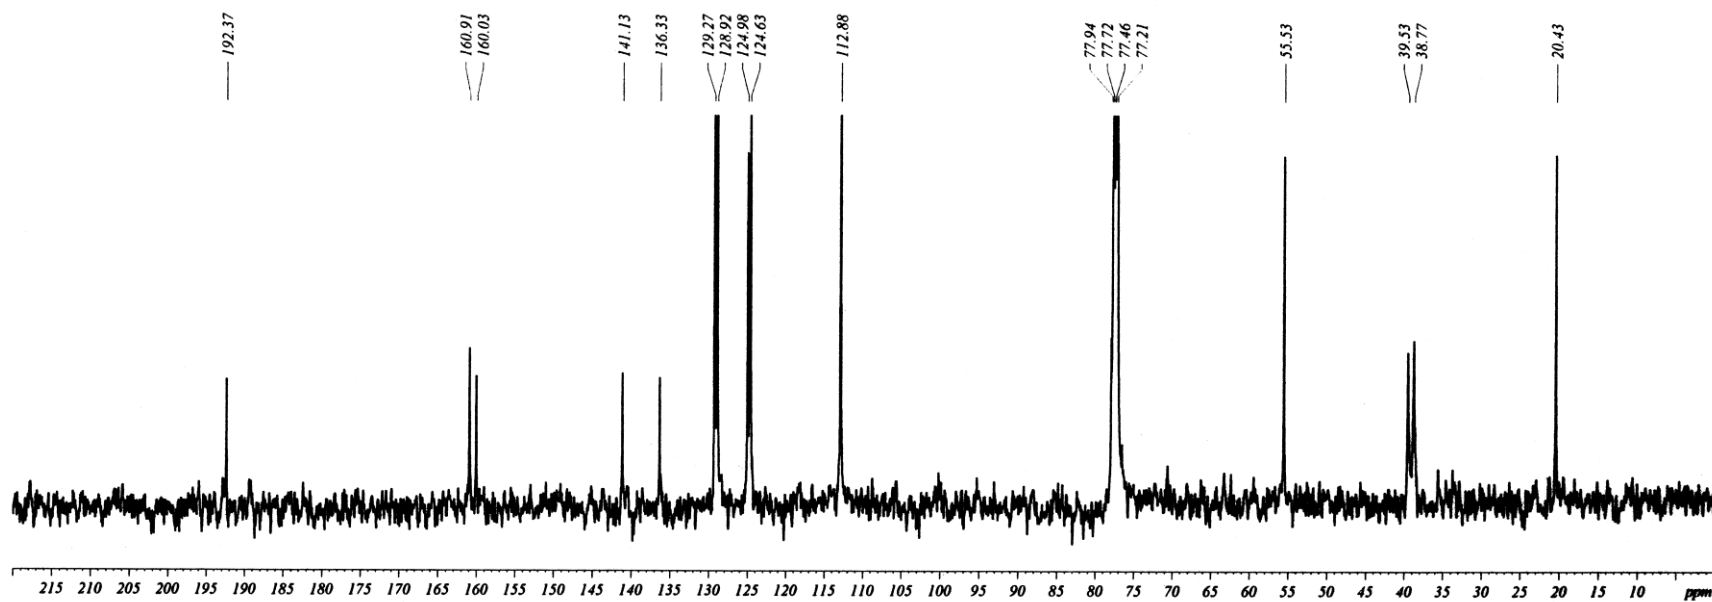

Figure S38  $^{13}\text{C}$  NMR spectrum (125 MHz,  $\text{CDCl}_3$ ) of compound **4b**

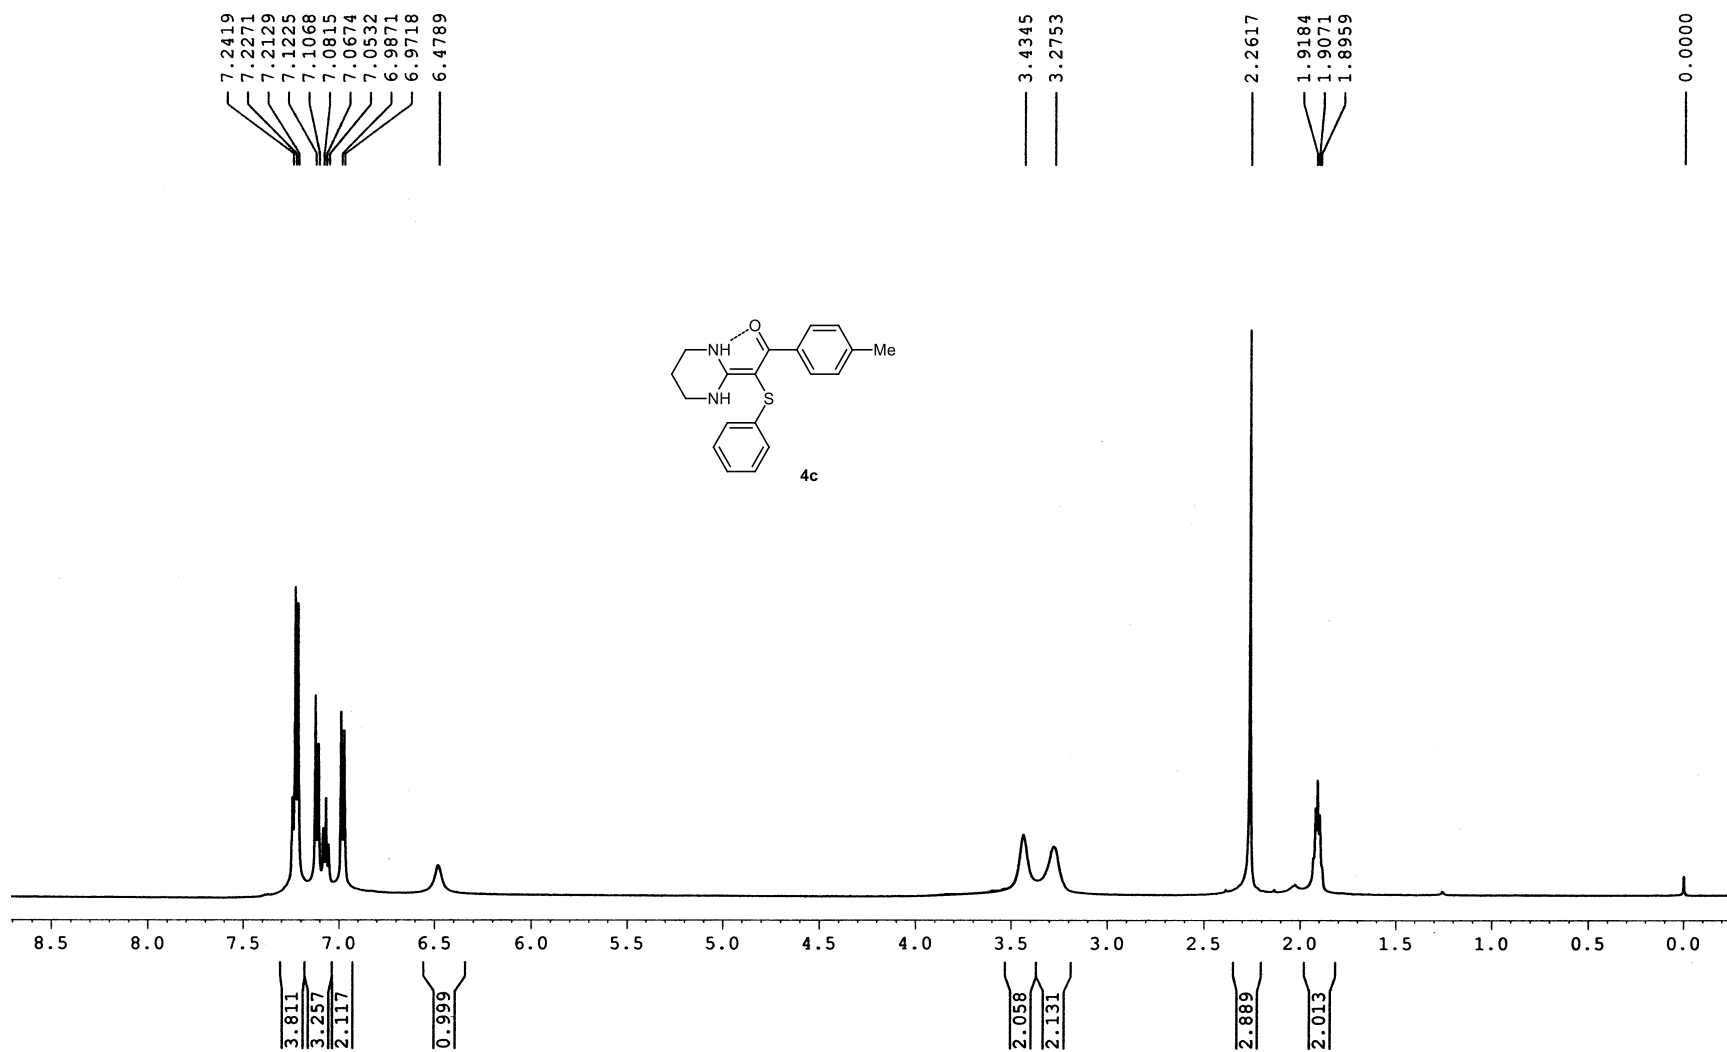

**Figure S39**  $^1\text{H}$  NMR spectrum (500 MHz,  $\text{CDCl}_3$ ) of compound **4c**

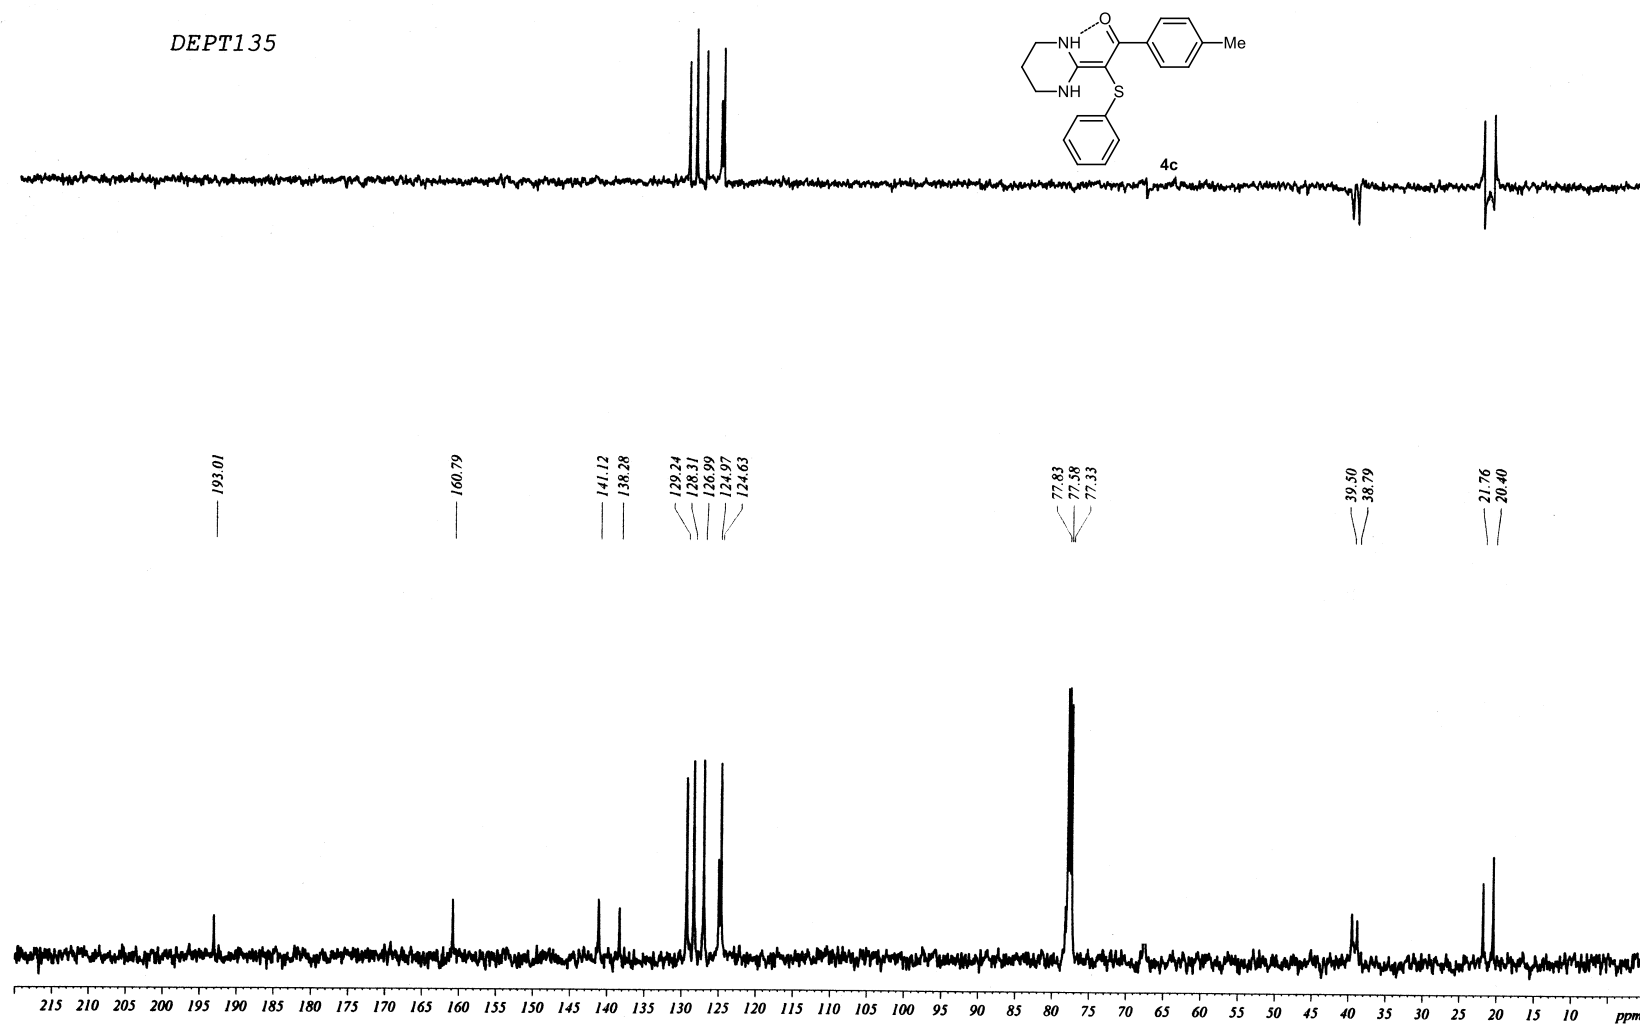

Figure S40  $^{13}\text{C}$  NMR spectrum (125 MHz,  $\text{CDCl}_3$ ) of compound **4c**



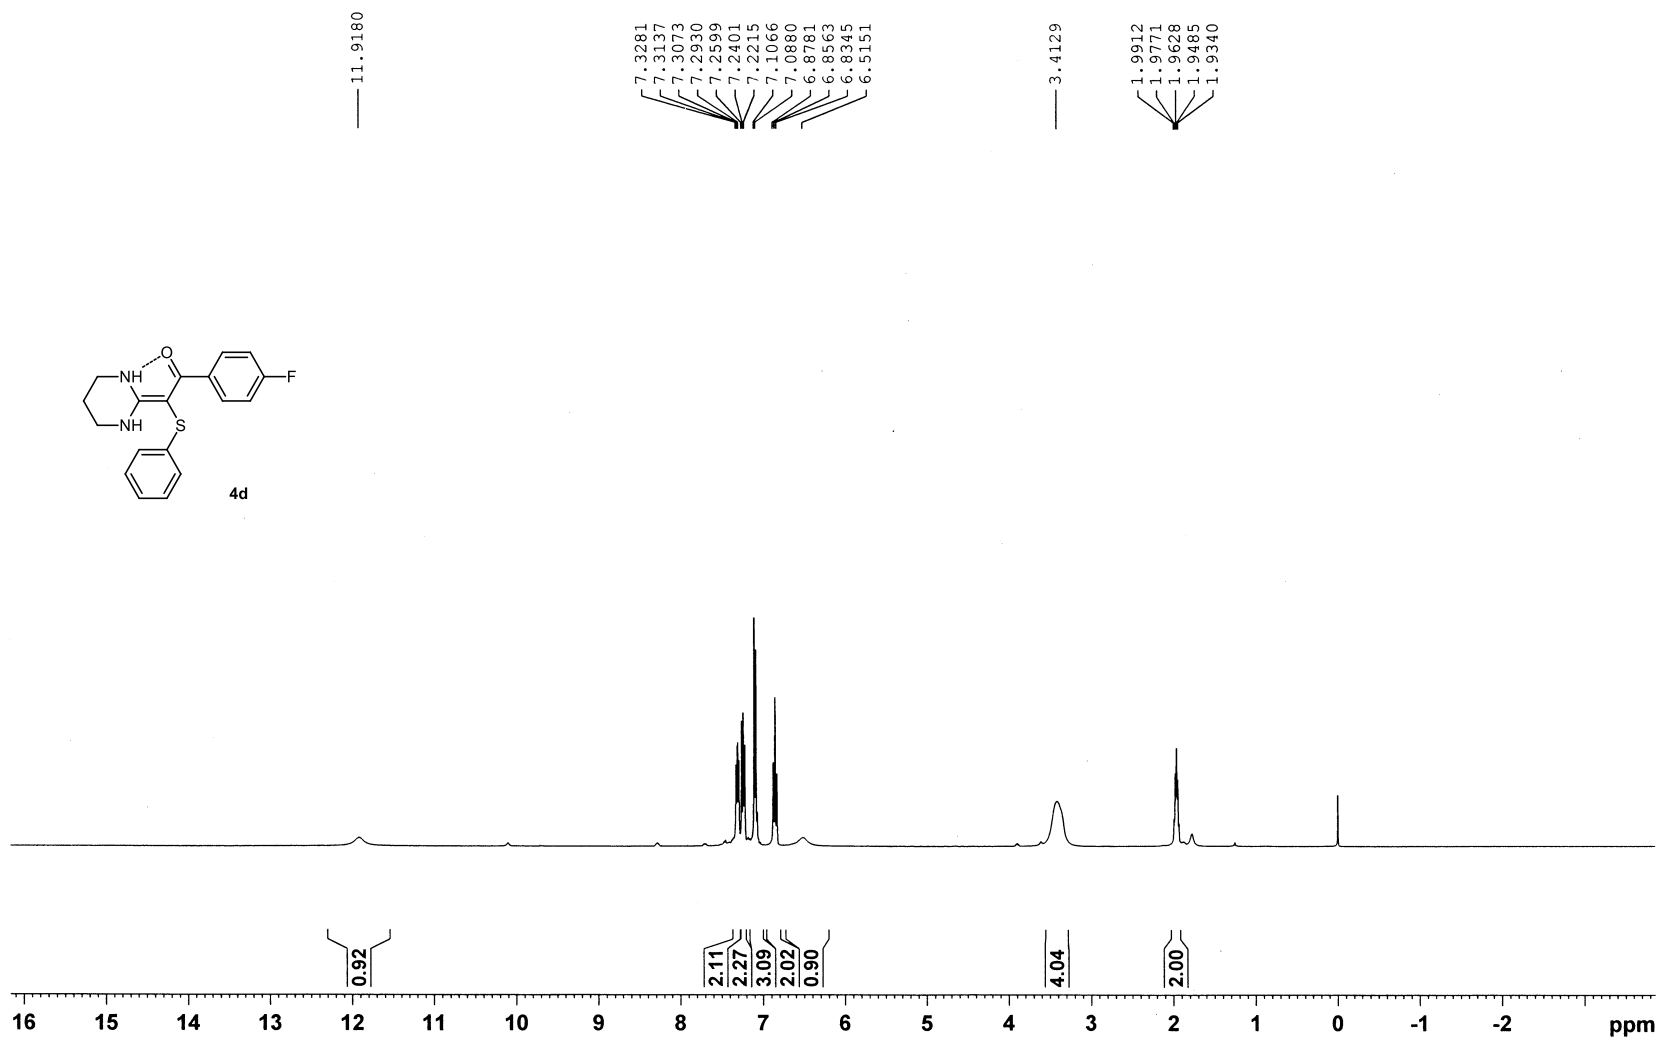

Figure S41  $^1\text{H}$  NMR spectrum (400 MHz,) of compound **4d**

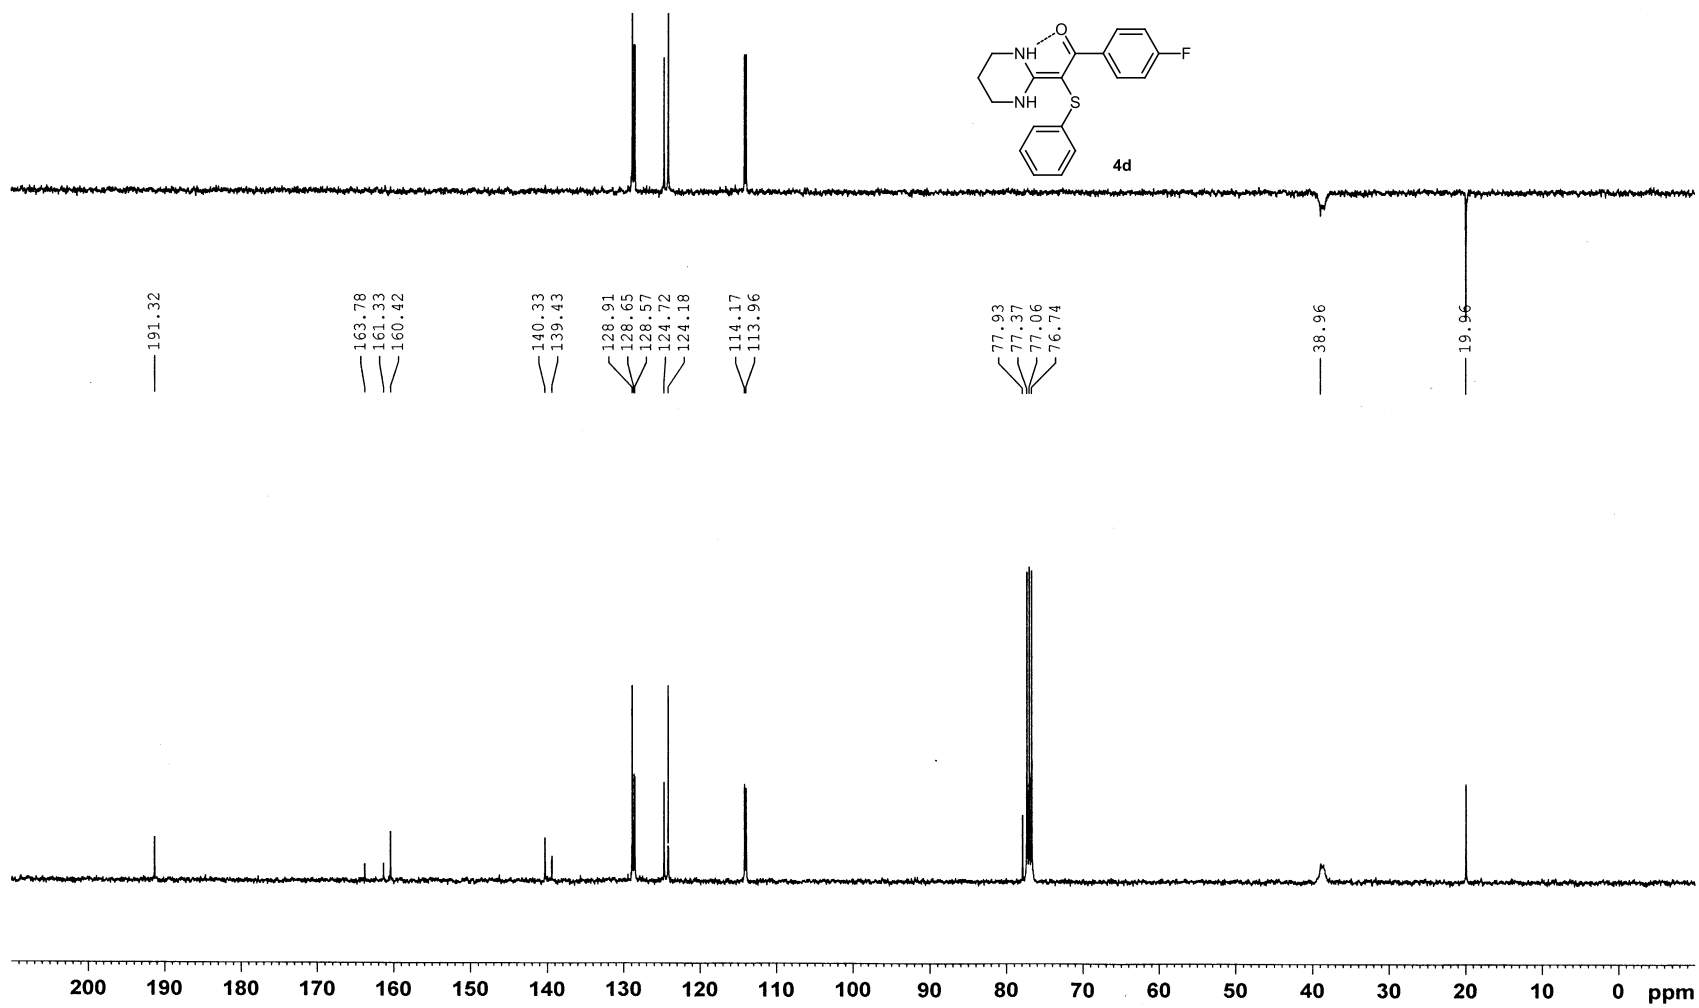

Figure S42 <sup>13</sup>C NMR spectrum (100 MHz,) of compound 4d

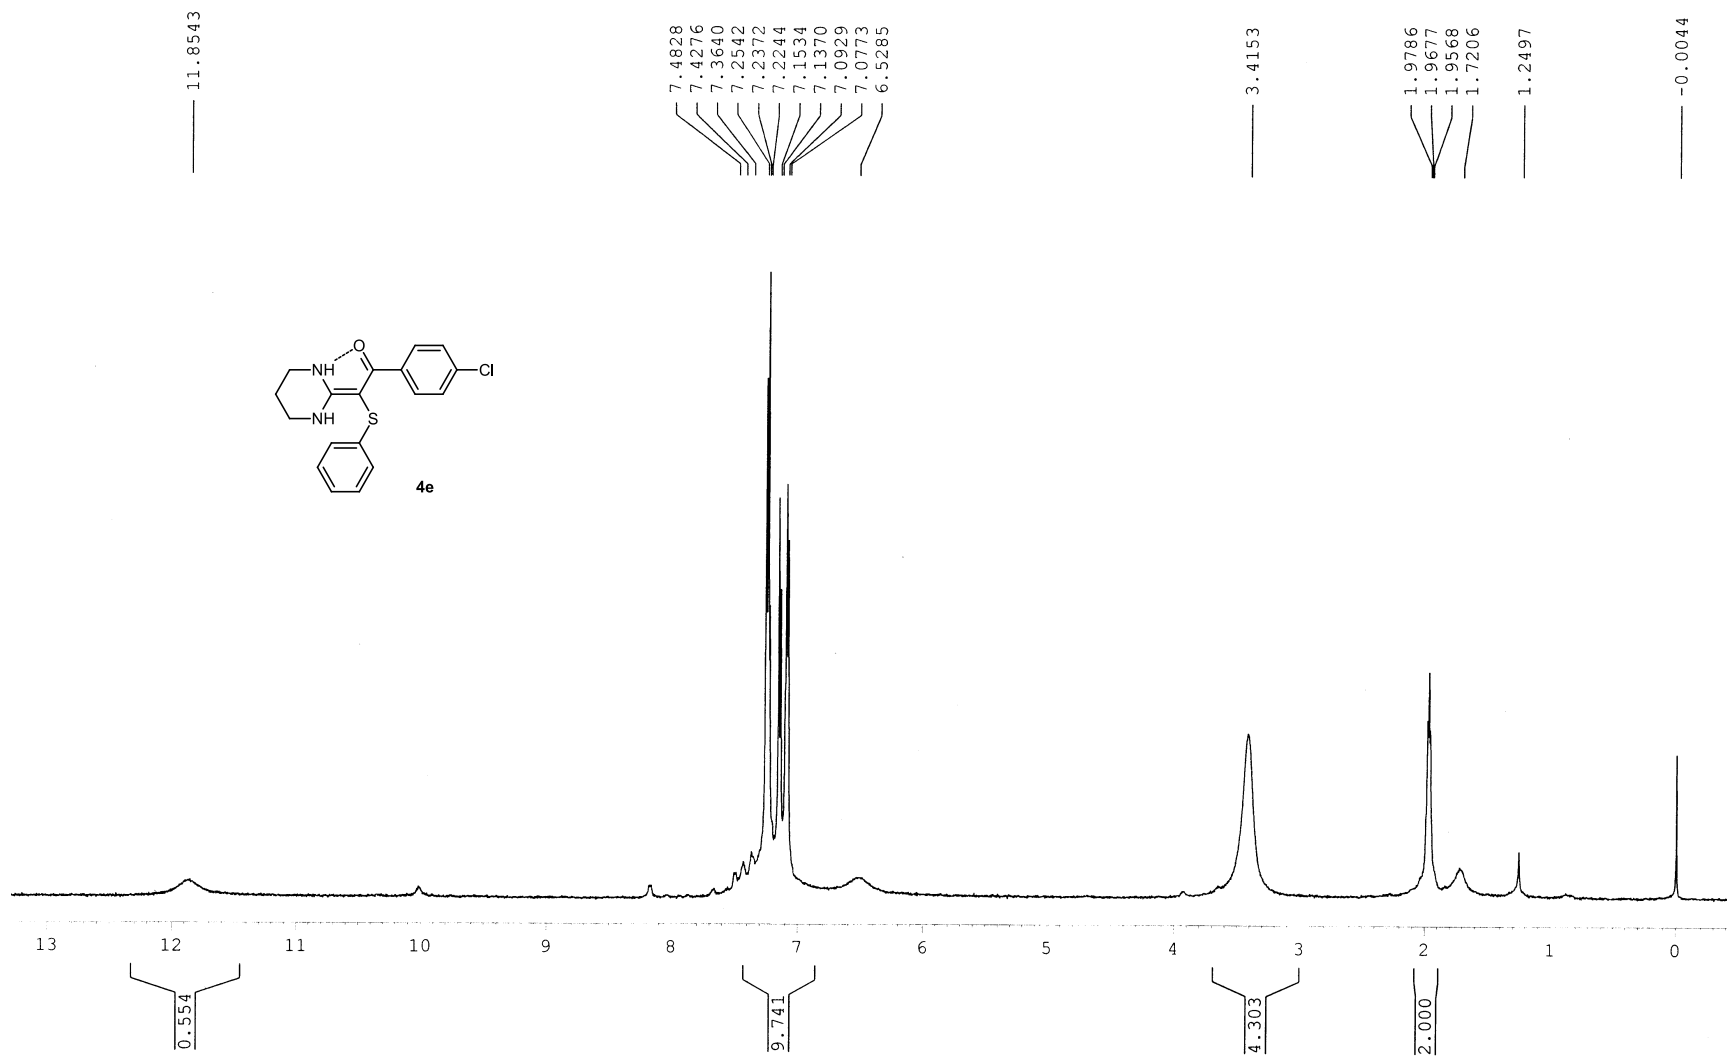

**Figure S43** <sup>1</sup>H NMR spectrum (500 MHz, CDCl<sub>3</sub>) of compound **4e**

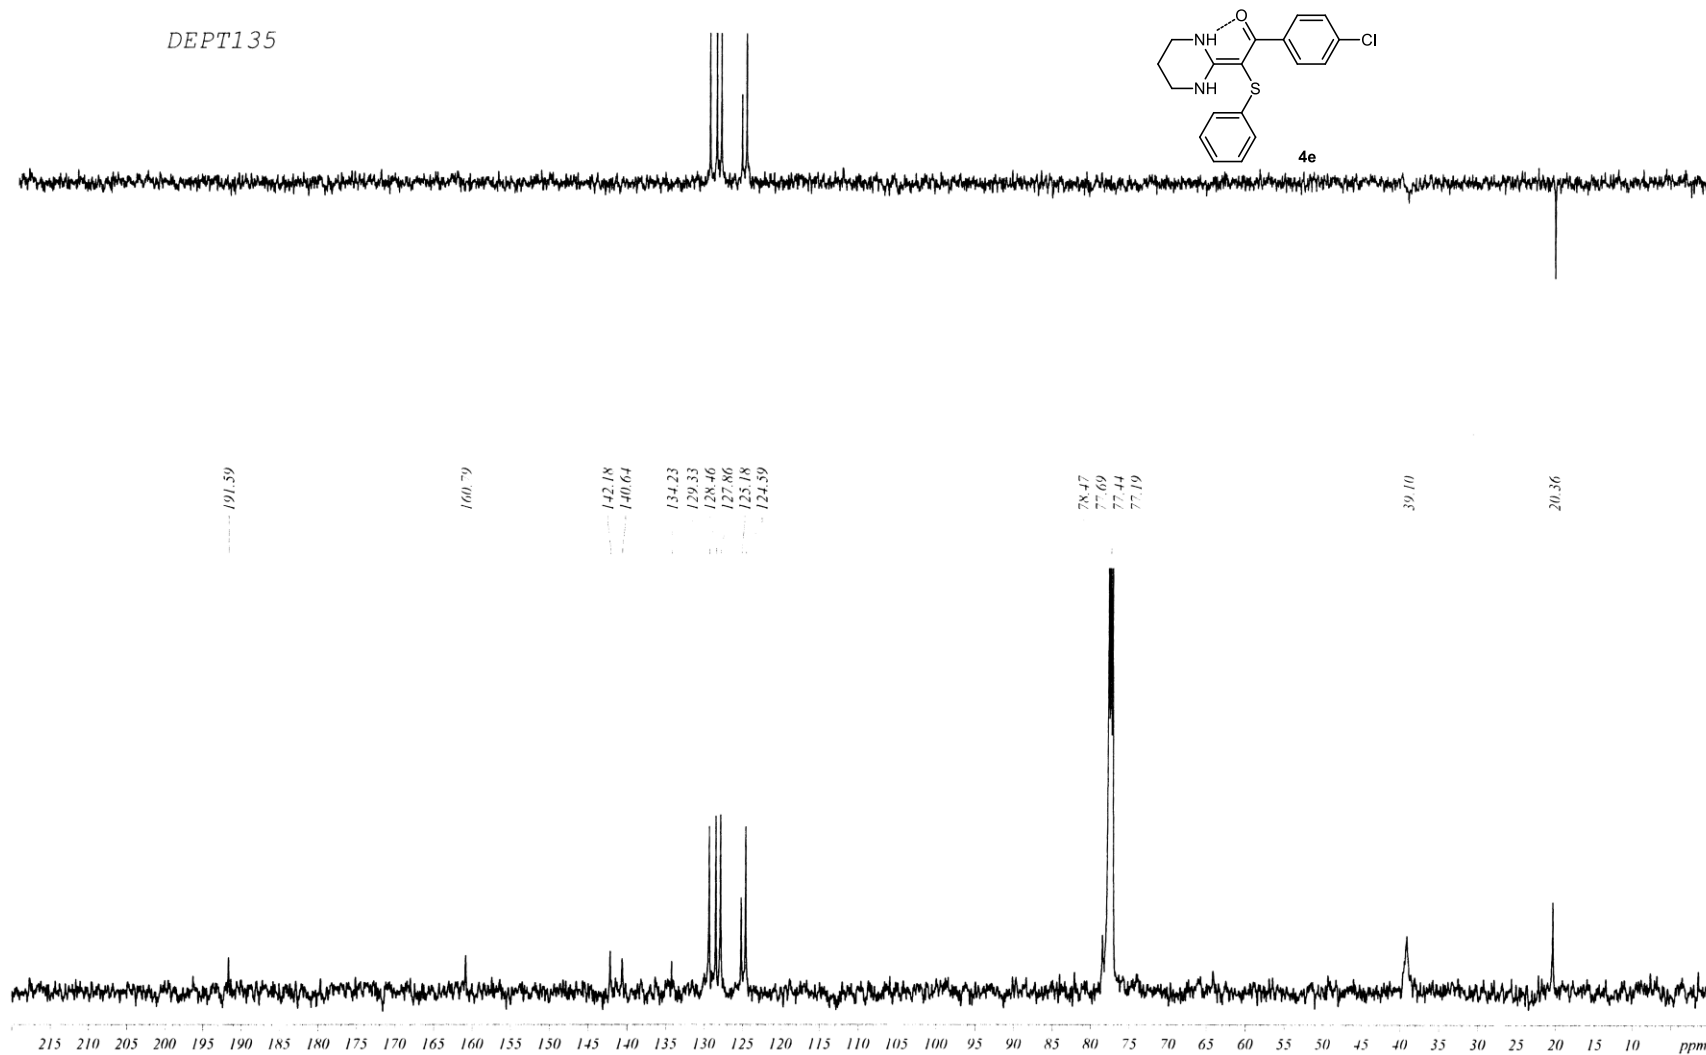

Figure S44  $^{13}\text{C}$  NMR spectrum (125 MHz,  $\text{CDCl}_3$ ) of compound **4e**

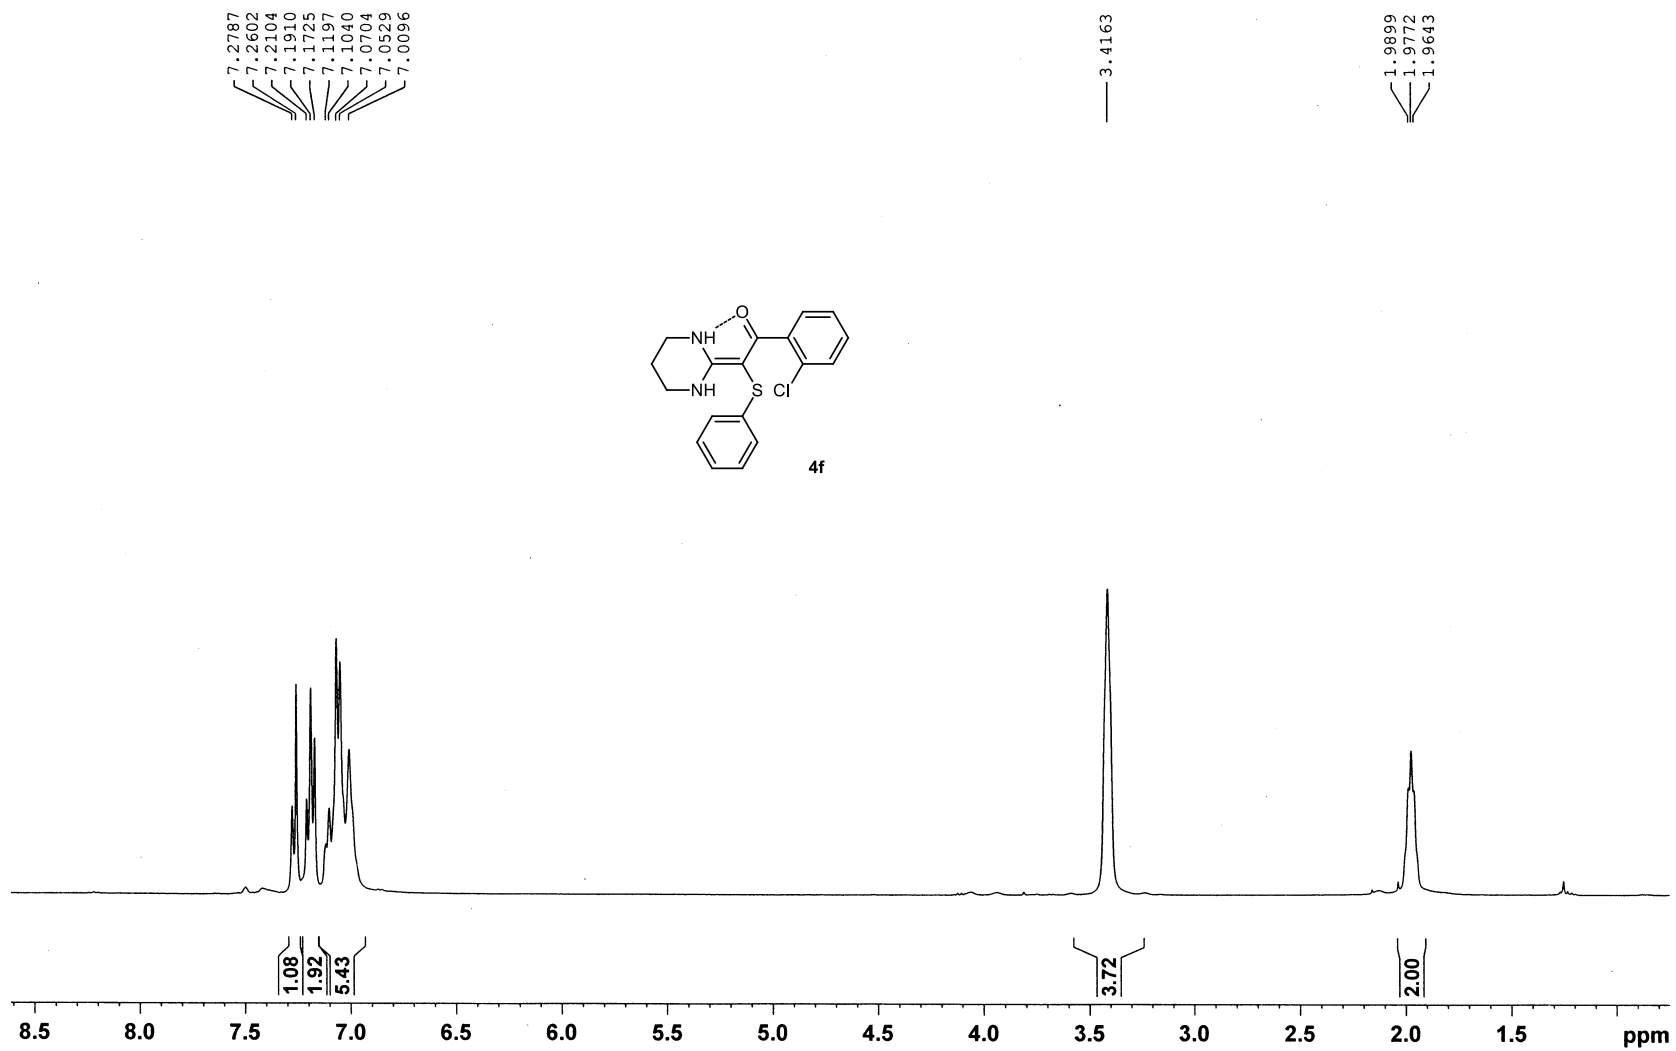

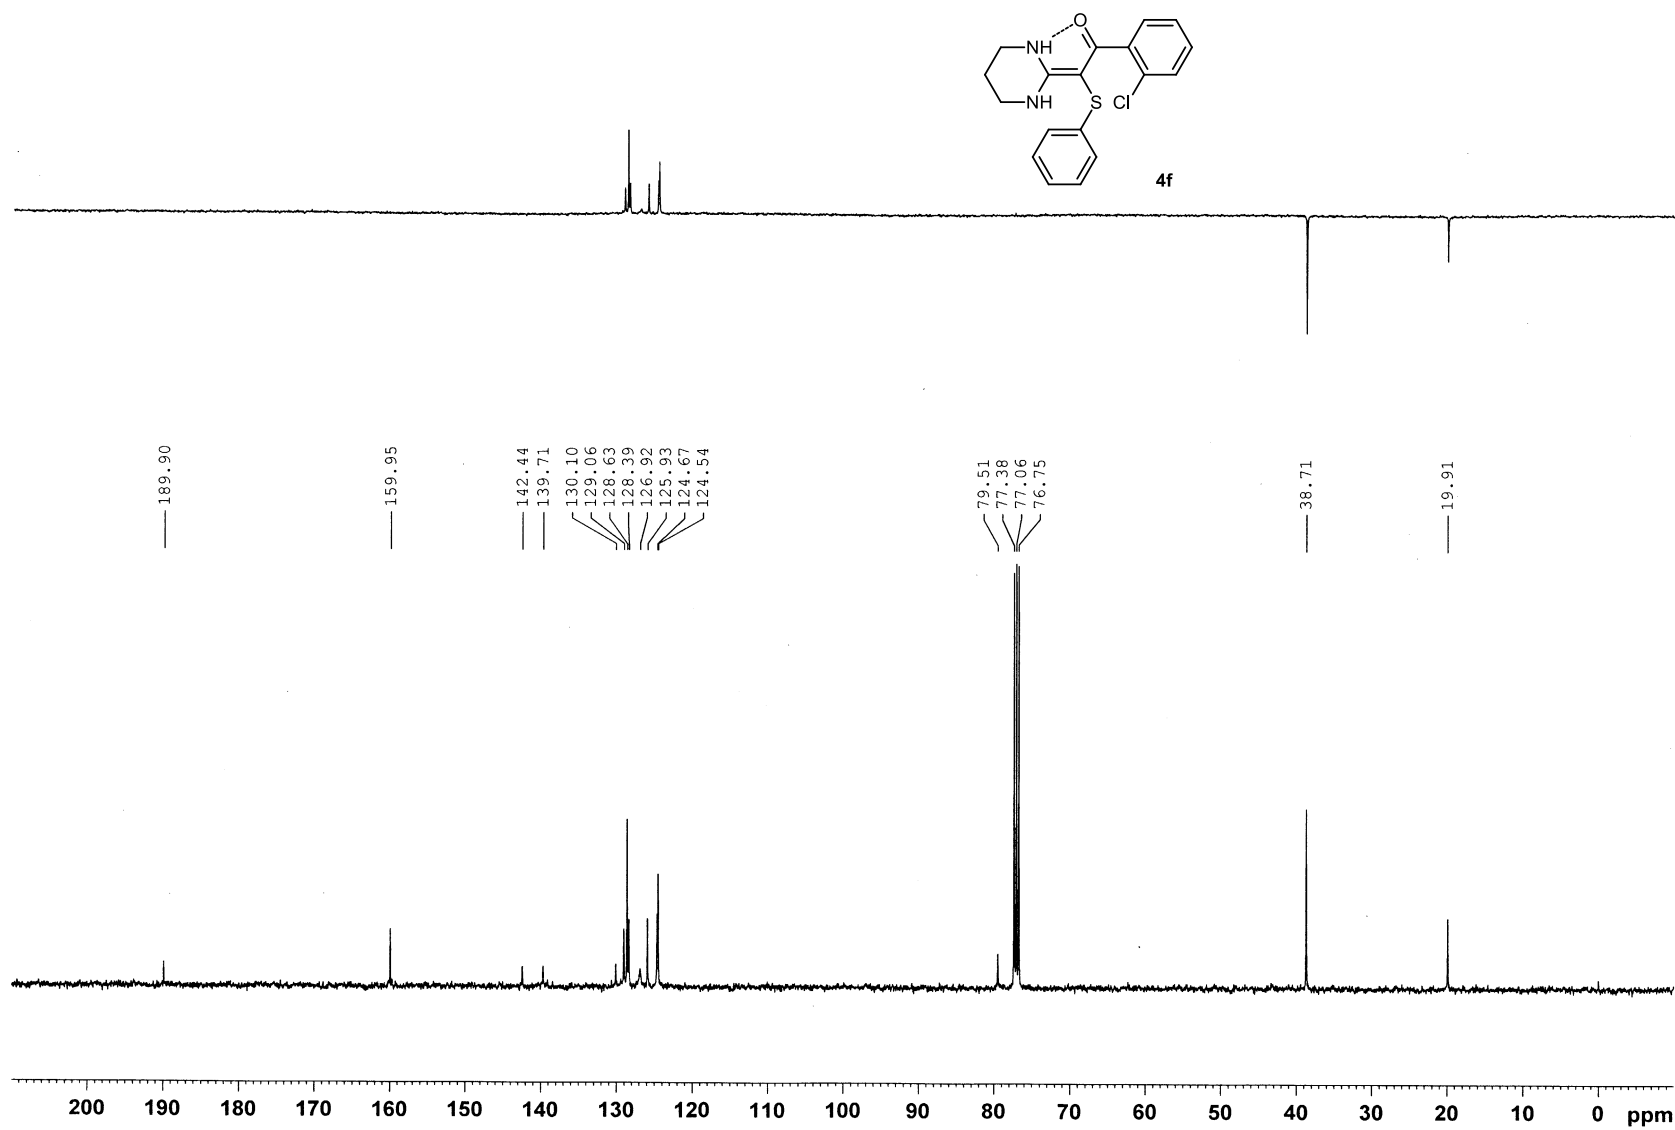

Figure S46  $^{13}\text{C}$  NMR spectrum (100MHz,  $\text{CDCl}_3$ ) of compound **4f**

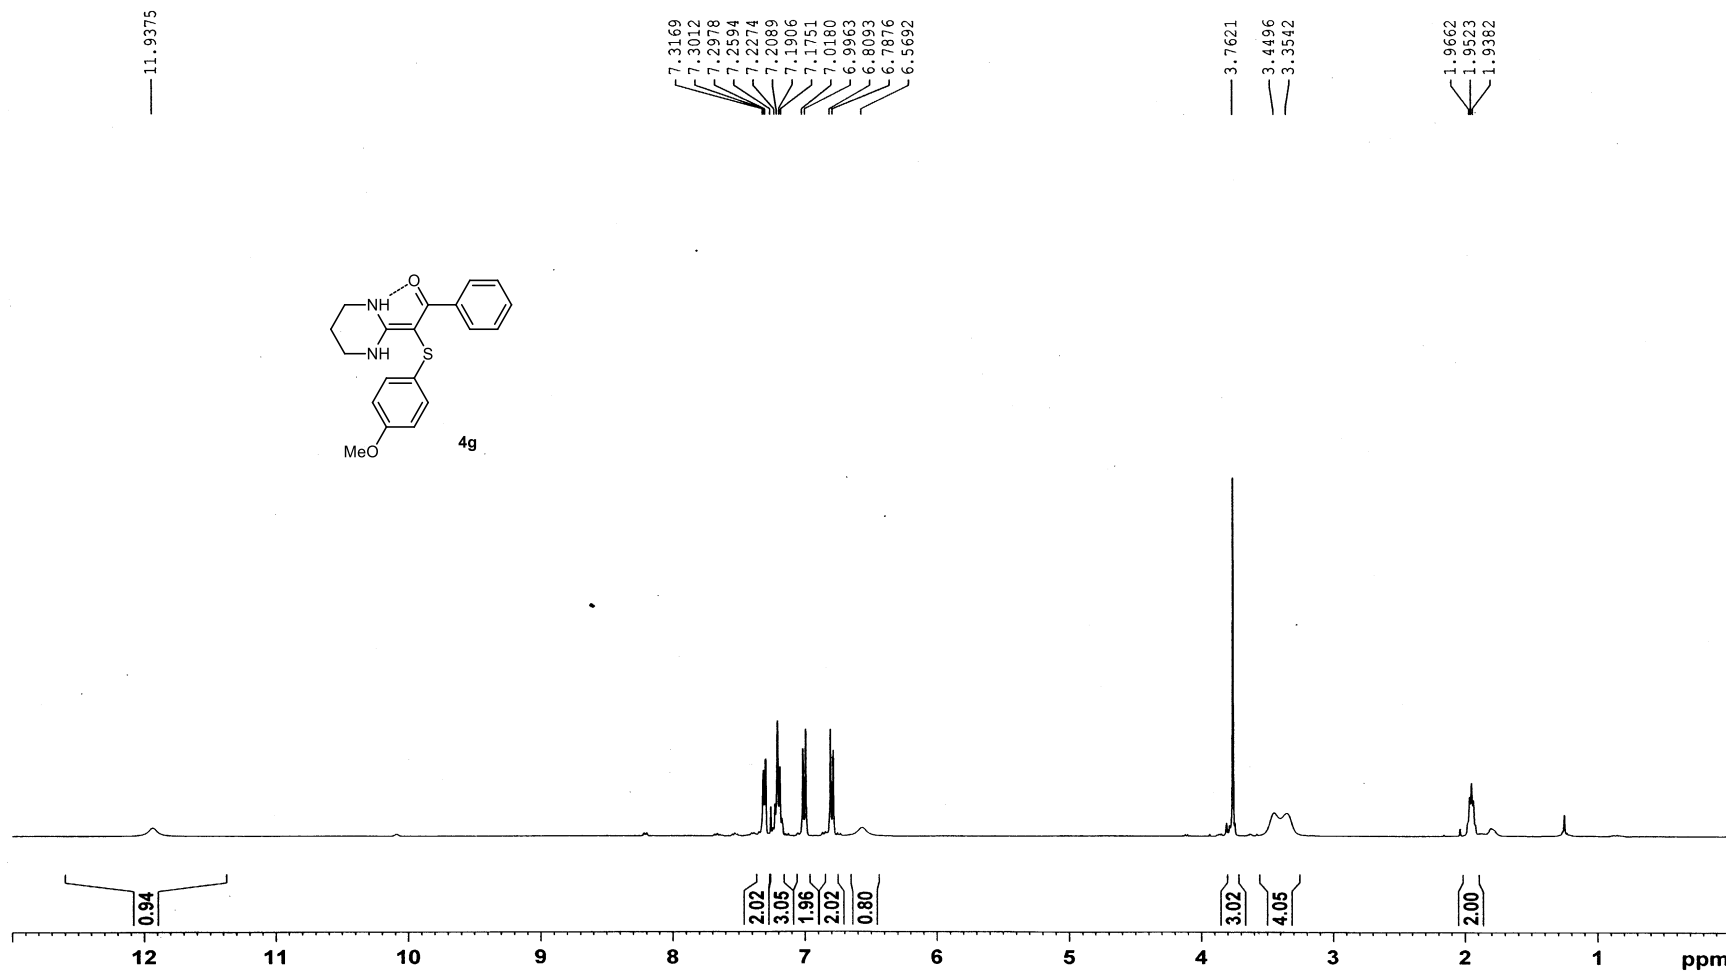

Figure S47 <sup>1</sup>H NMR spectrum (400 MHz, CDCl<sub>3</sub>) of compound **4g**

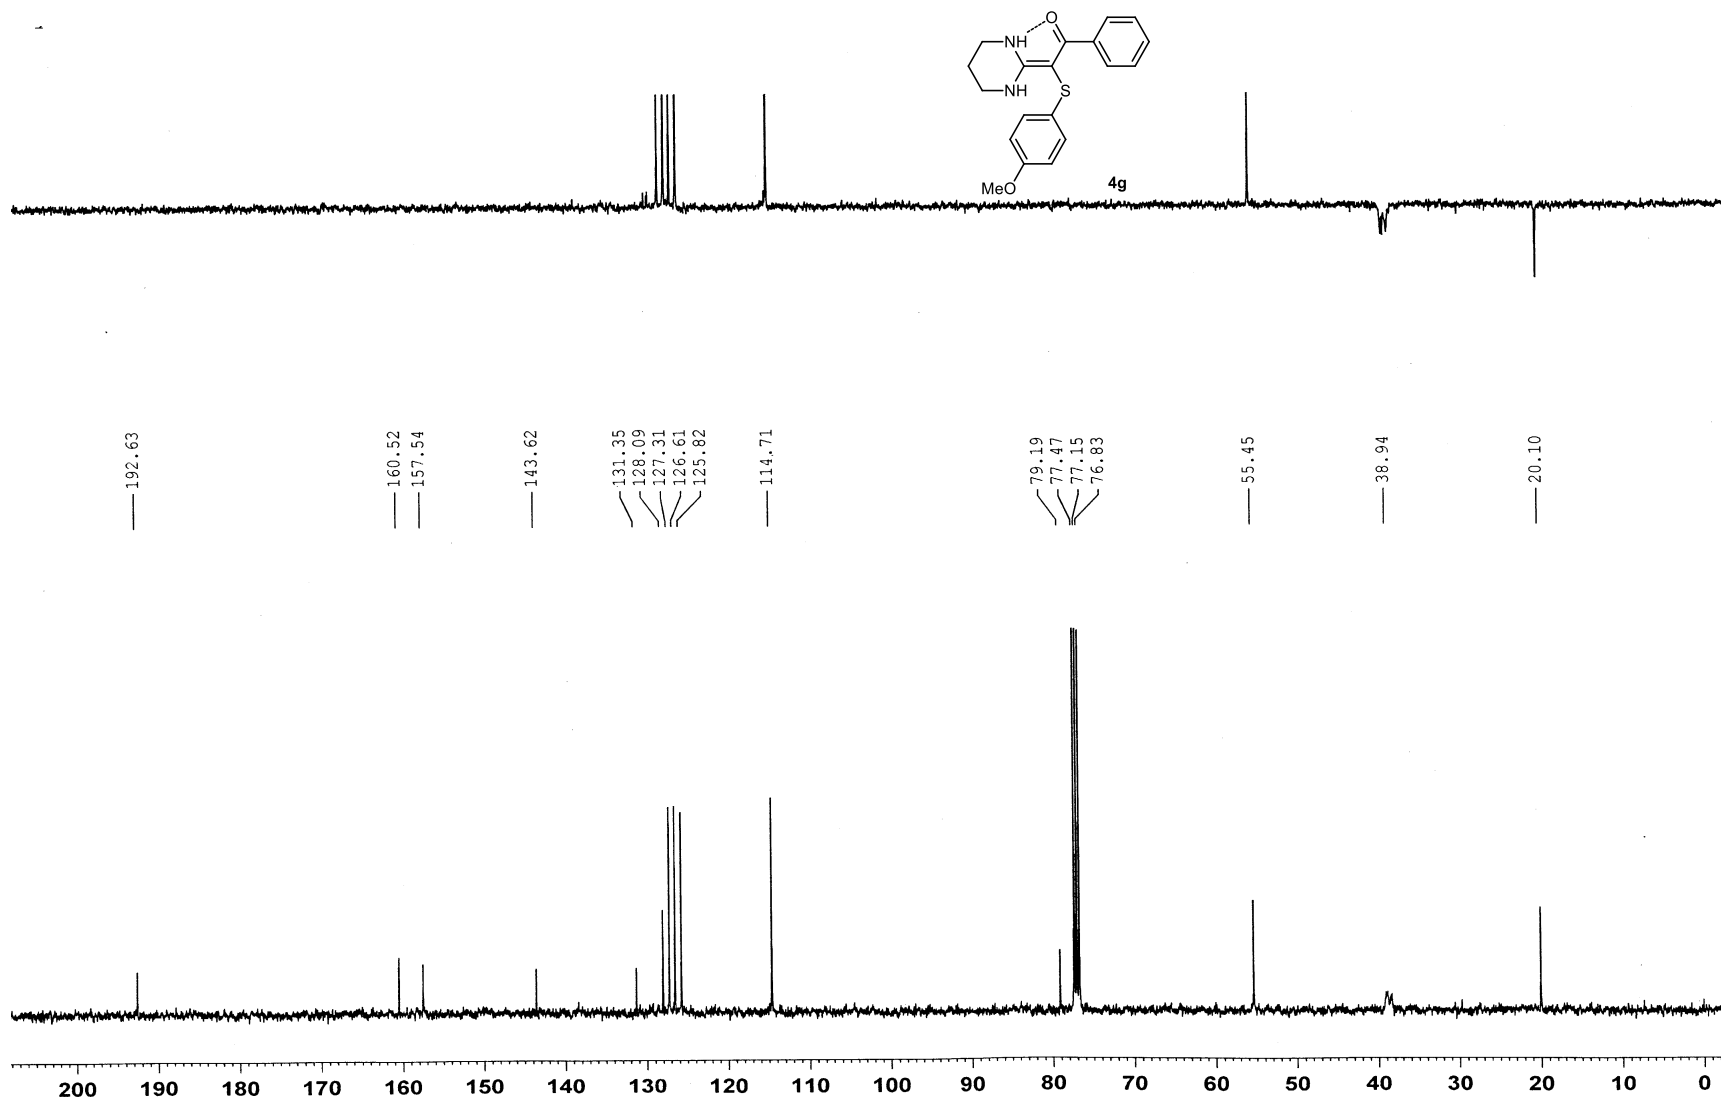

Figure S48 <sup>13</sup>C NMR spectrum (100 MHz, CDCl<sub>3</sub>) of compound 4g



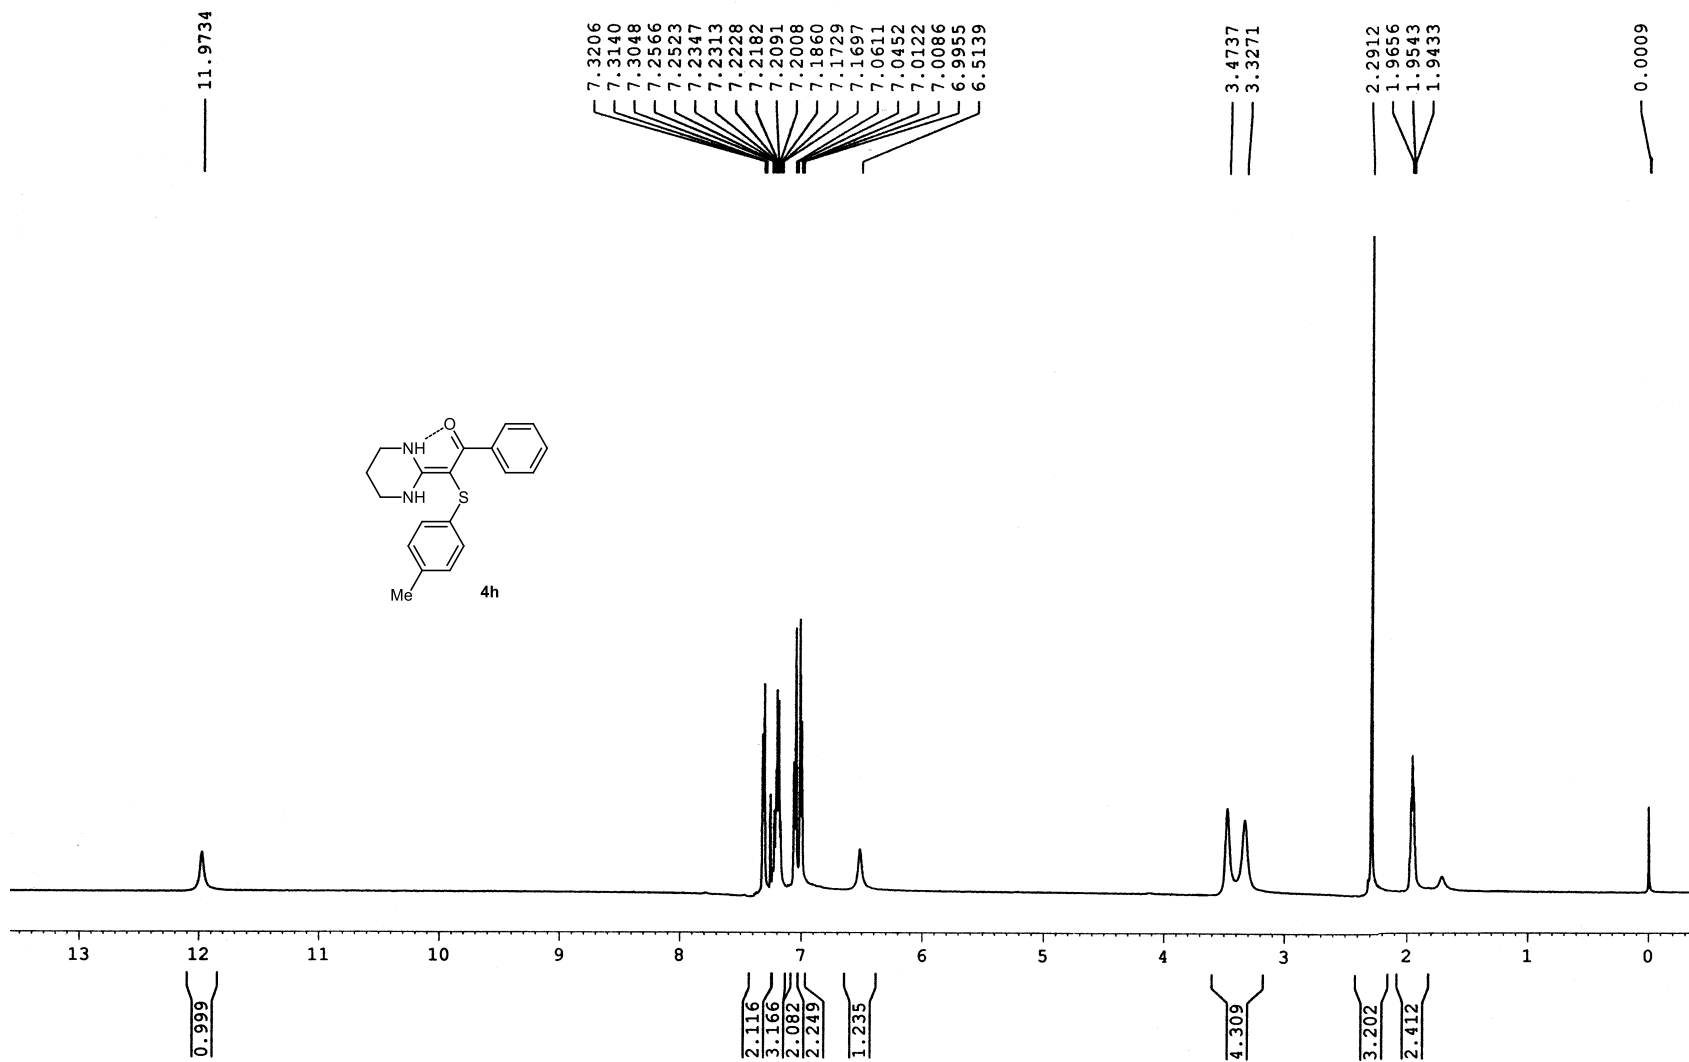

**Figure S49**  $^1\text{H}$  NMR spectrum (500 MHz,  $\text{CDCl}_3$ ) of compound **4h**

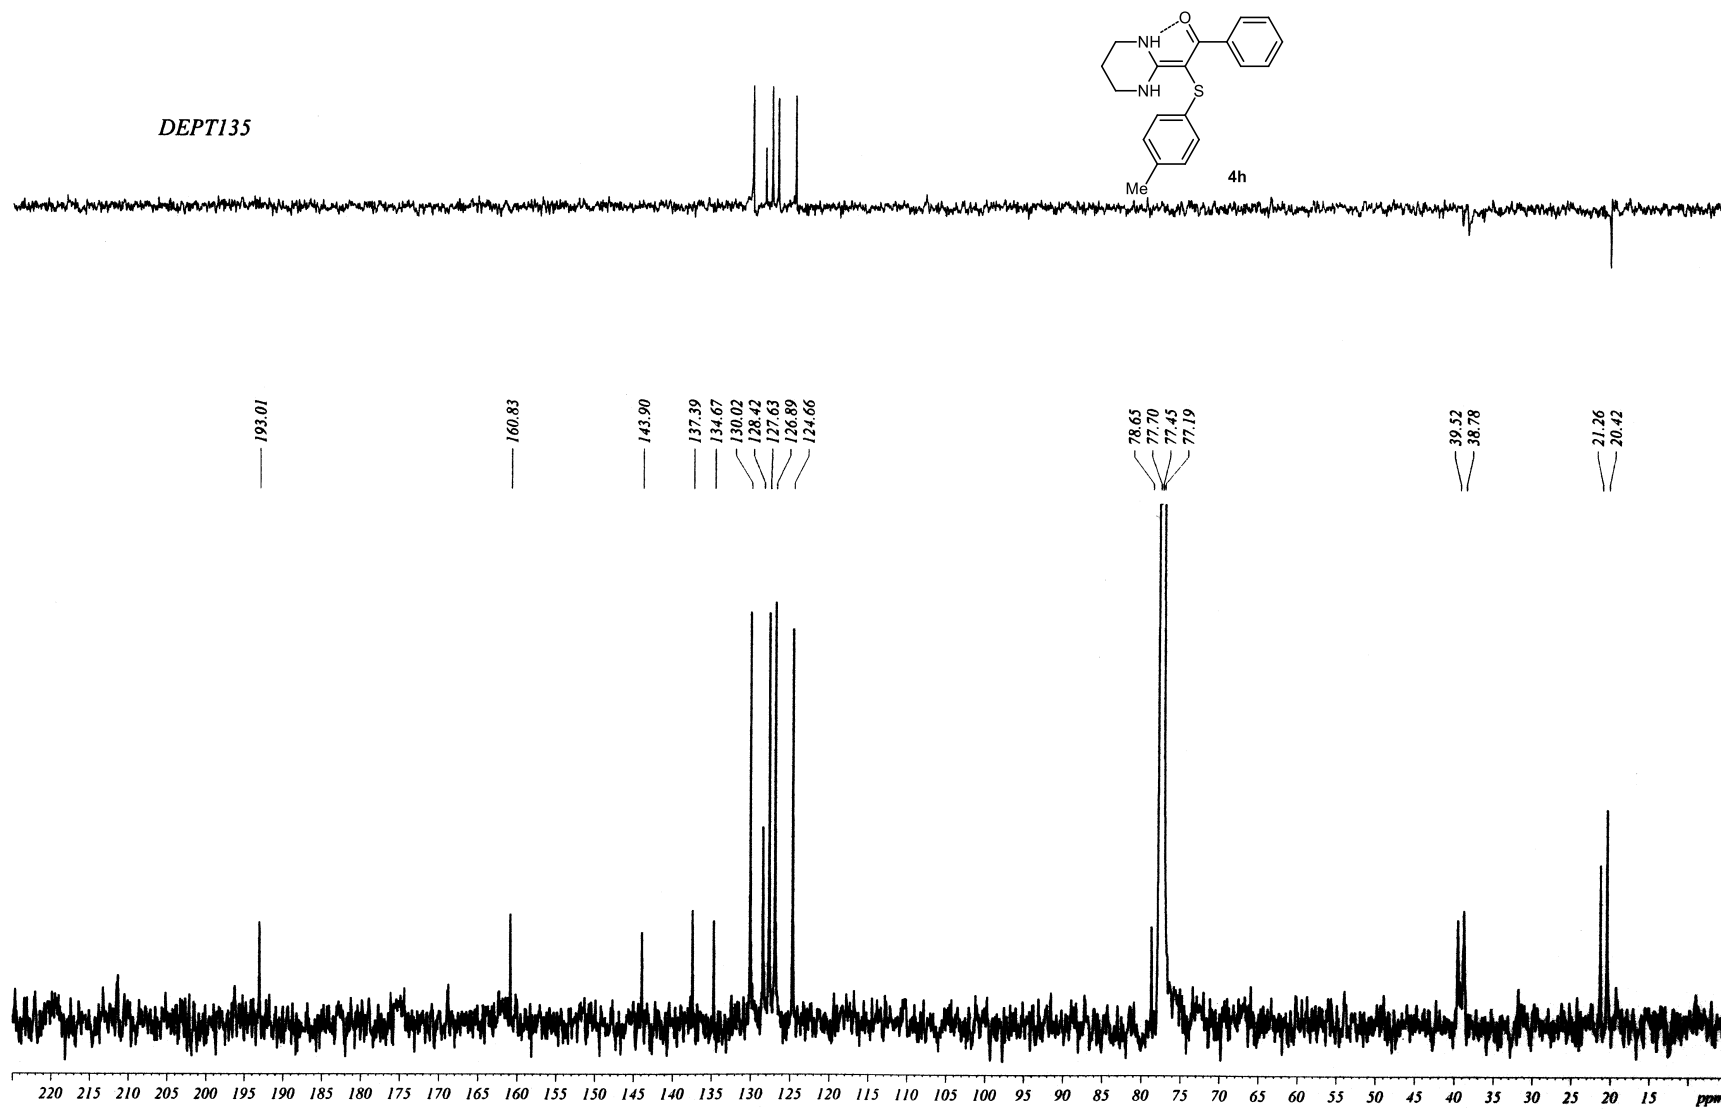

Figure S50  $^{13}\text{C}$  NMR spectrum (125 MHz,  $\text{CDCl}_3$ ) of compound **4h**

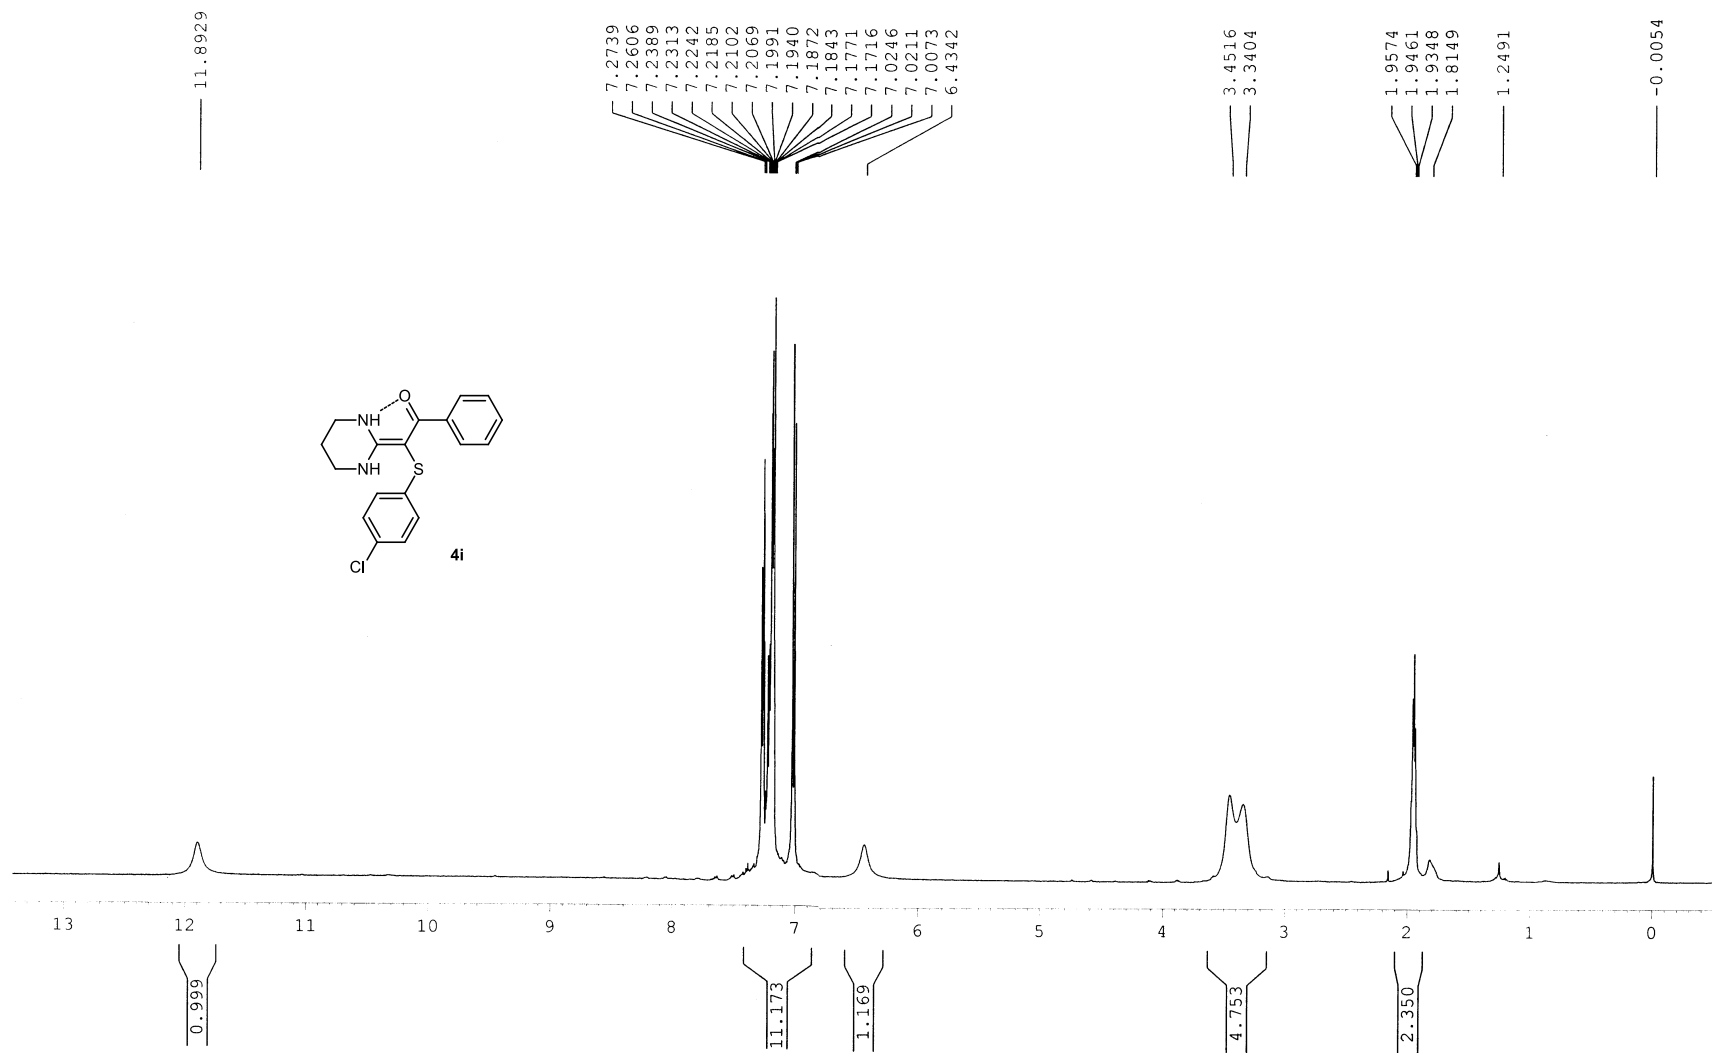

**Figure S51.** <sup>1</sup>H NMR (500 MHz, CDCl<sub>3</sub>) spectra of compound **4i**

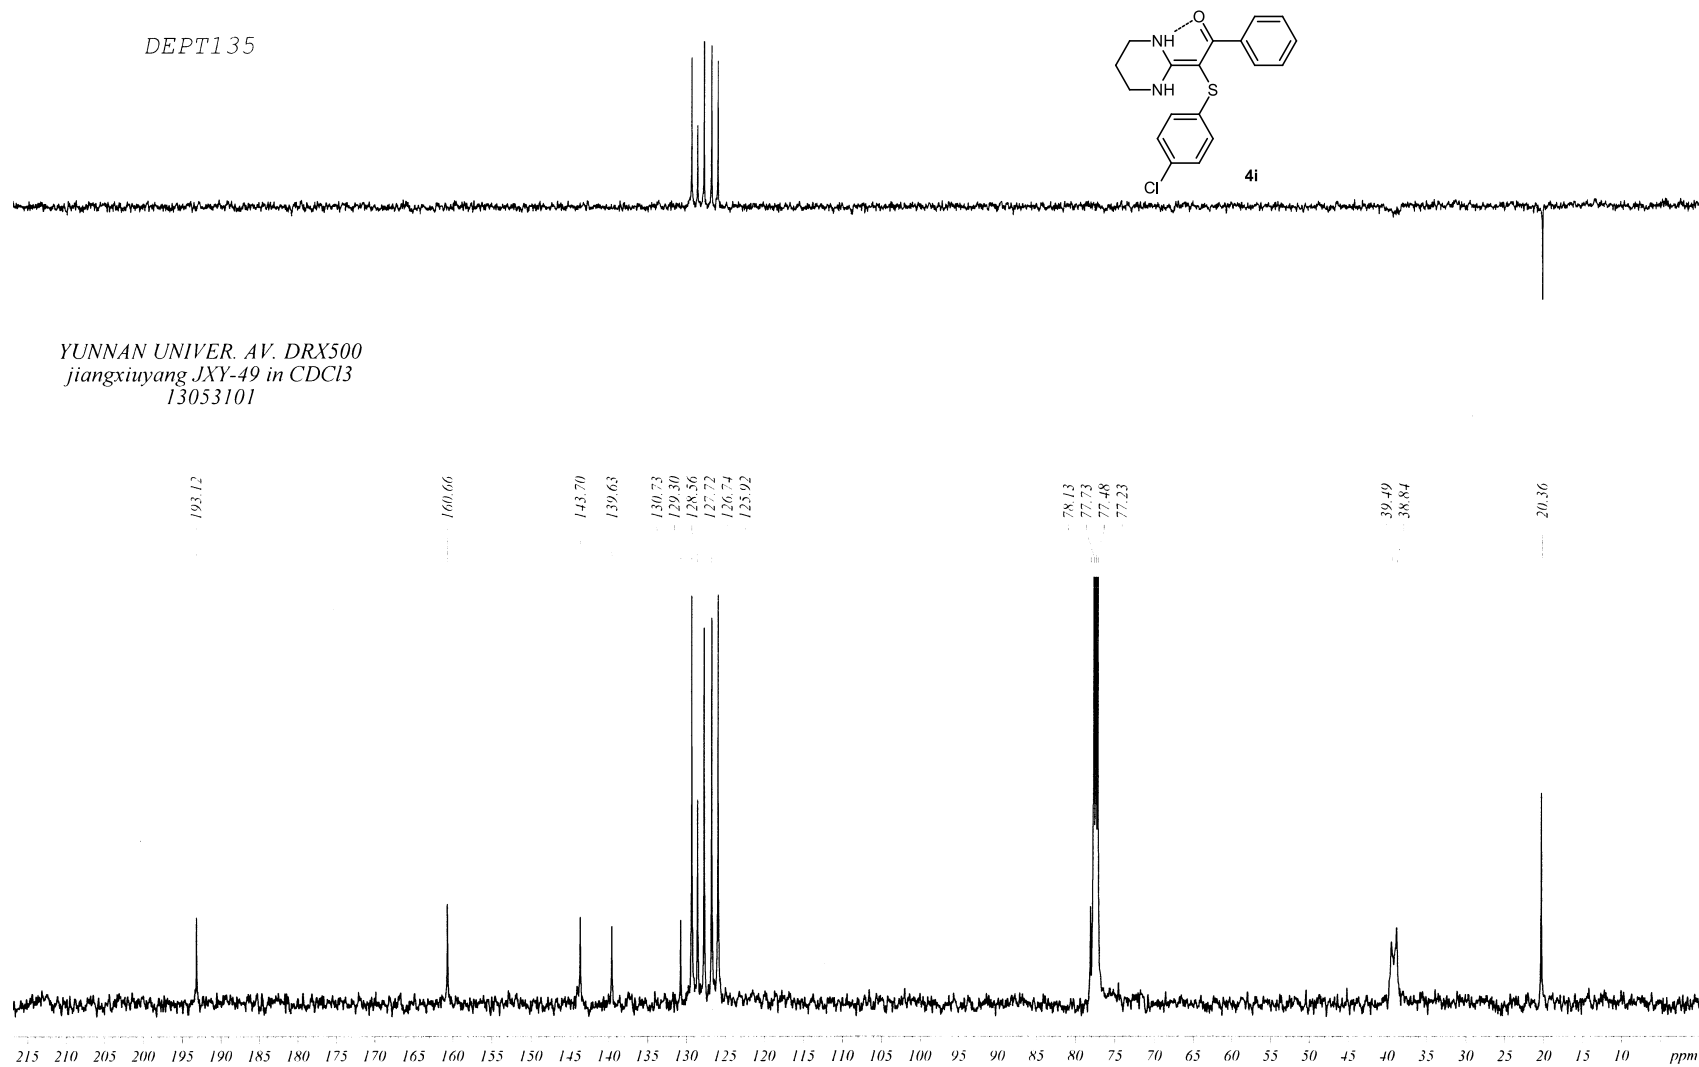

Figure S52. <sup>13</sup>C NMR (125 MHz, CDCl<sub>3</sub>) spectra of compound **4i**

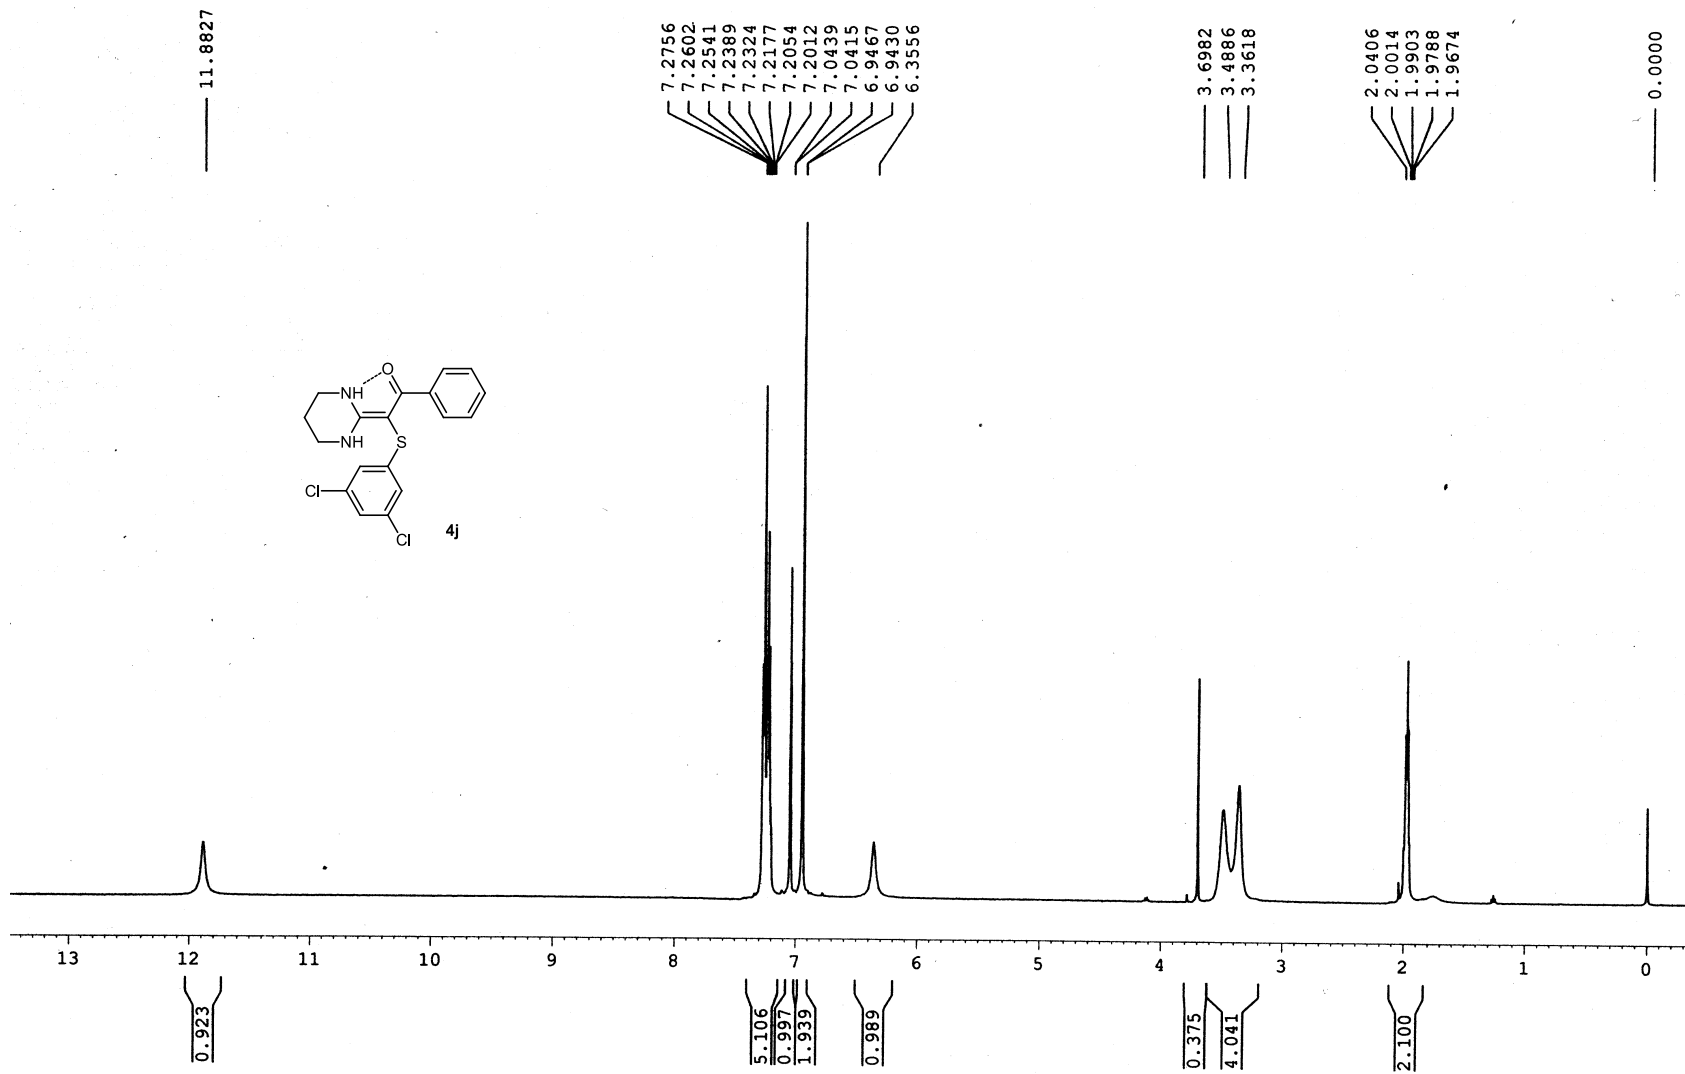

Figure S53. <sup>1</sup>H NMR (500 MHz, CDCl<sub>3</sub>) spectra of compound **4j**

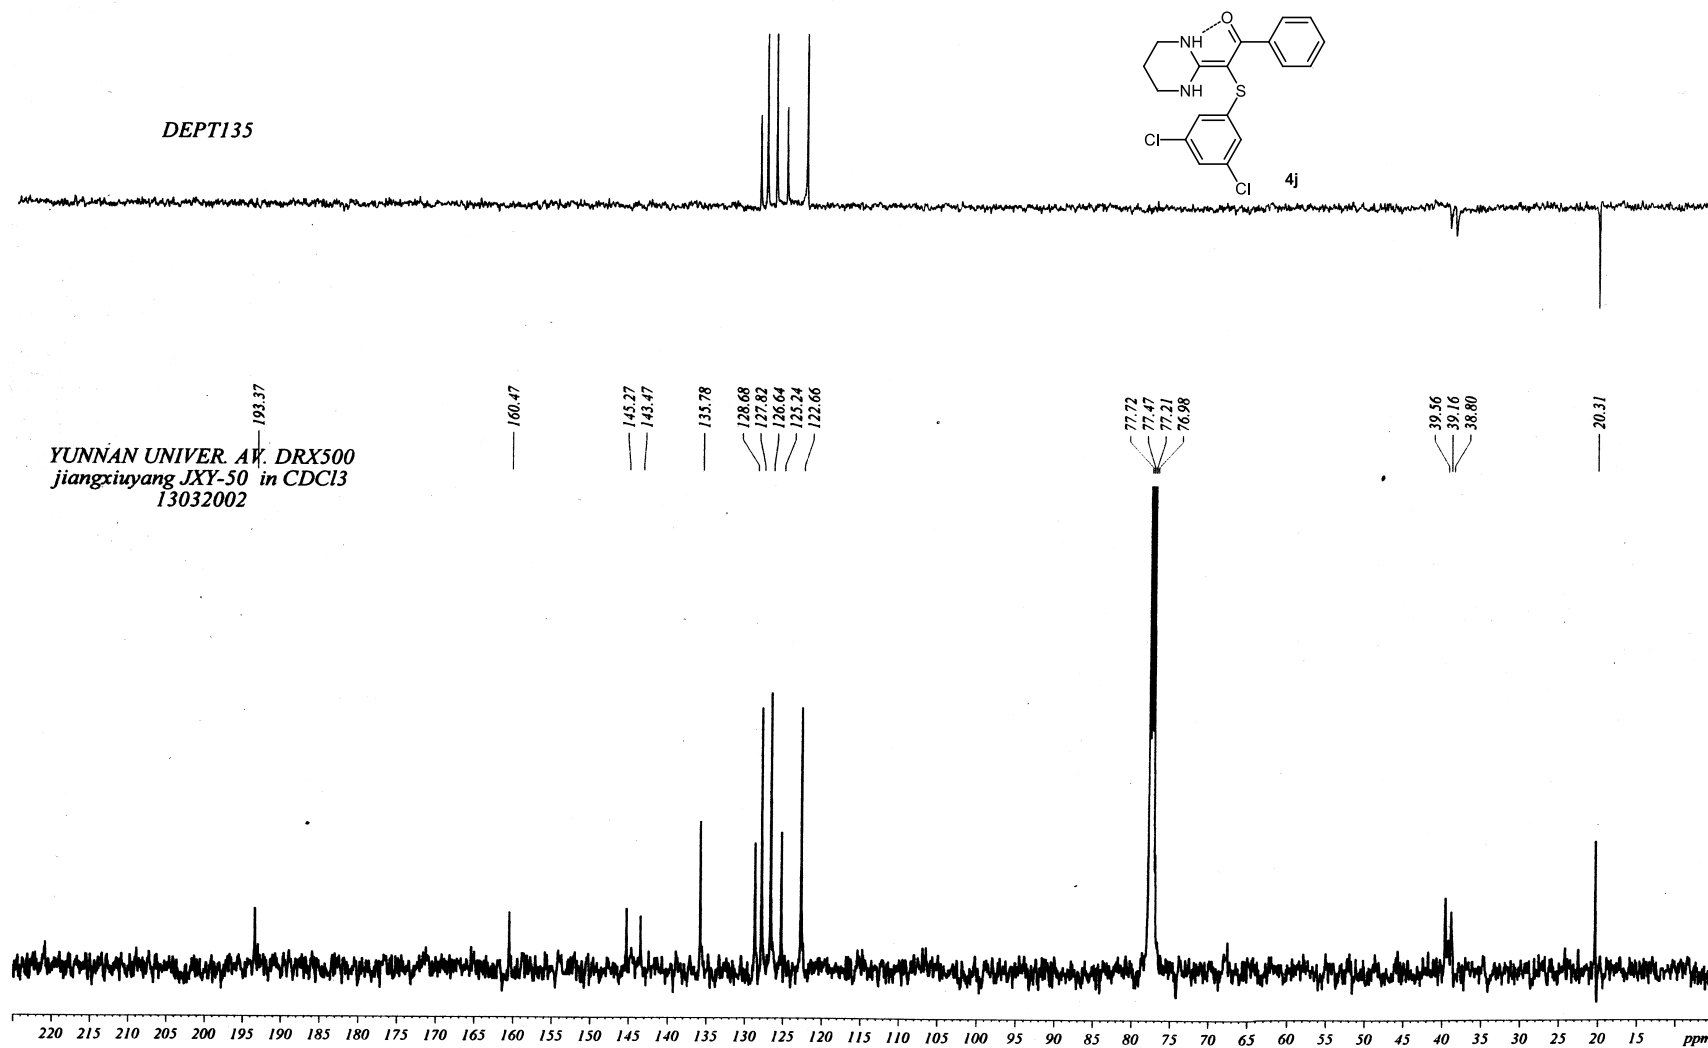

Figure S54. <sup>13</sup>C NMR (125 MHz, CDCl<sub>3</sub>) spectra of compound 4j

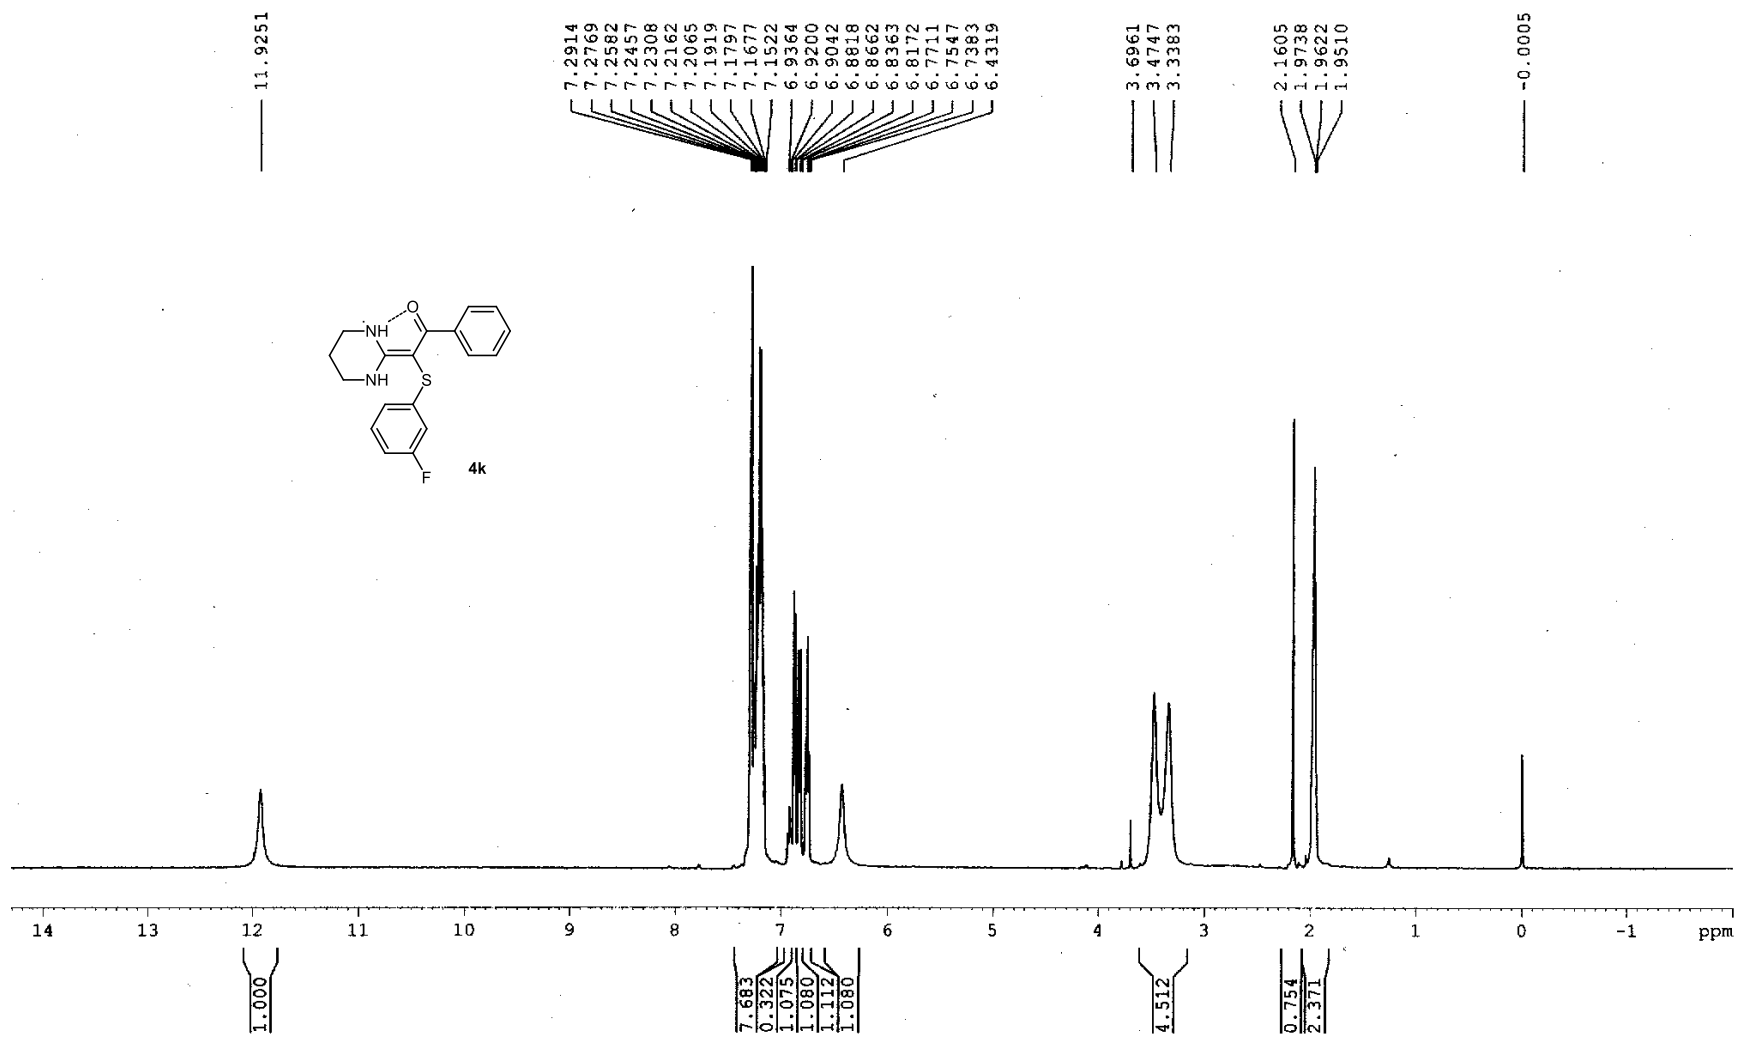

Figure S55. <sup>1</sup>H NMR (500 MHz, CDCl<sub>3</sub>) spectra of compound **4k**

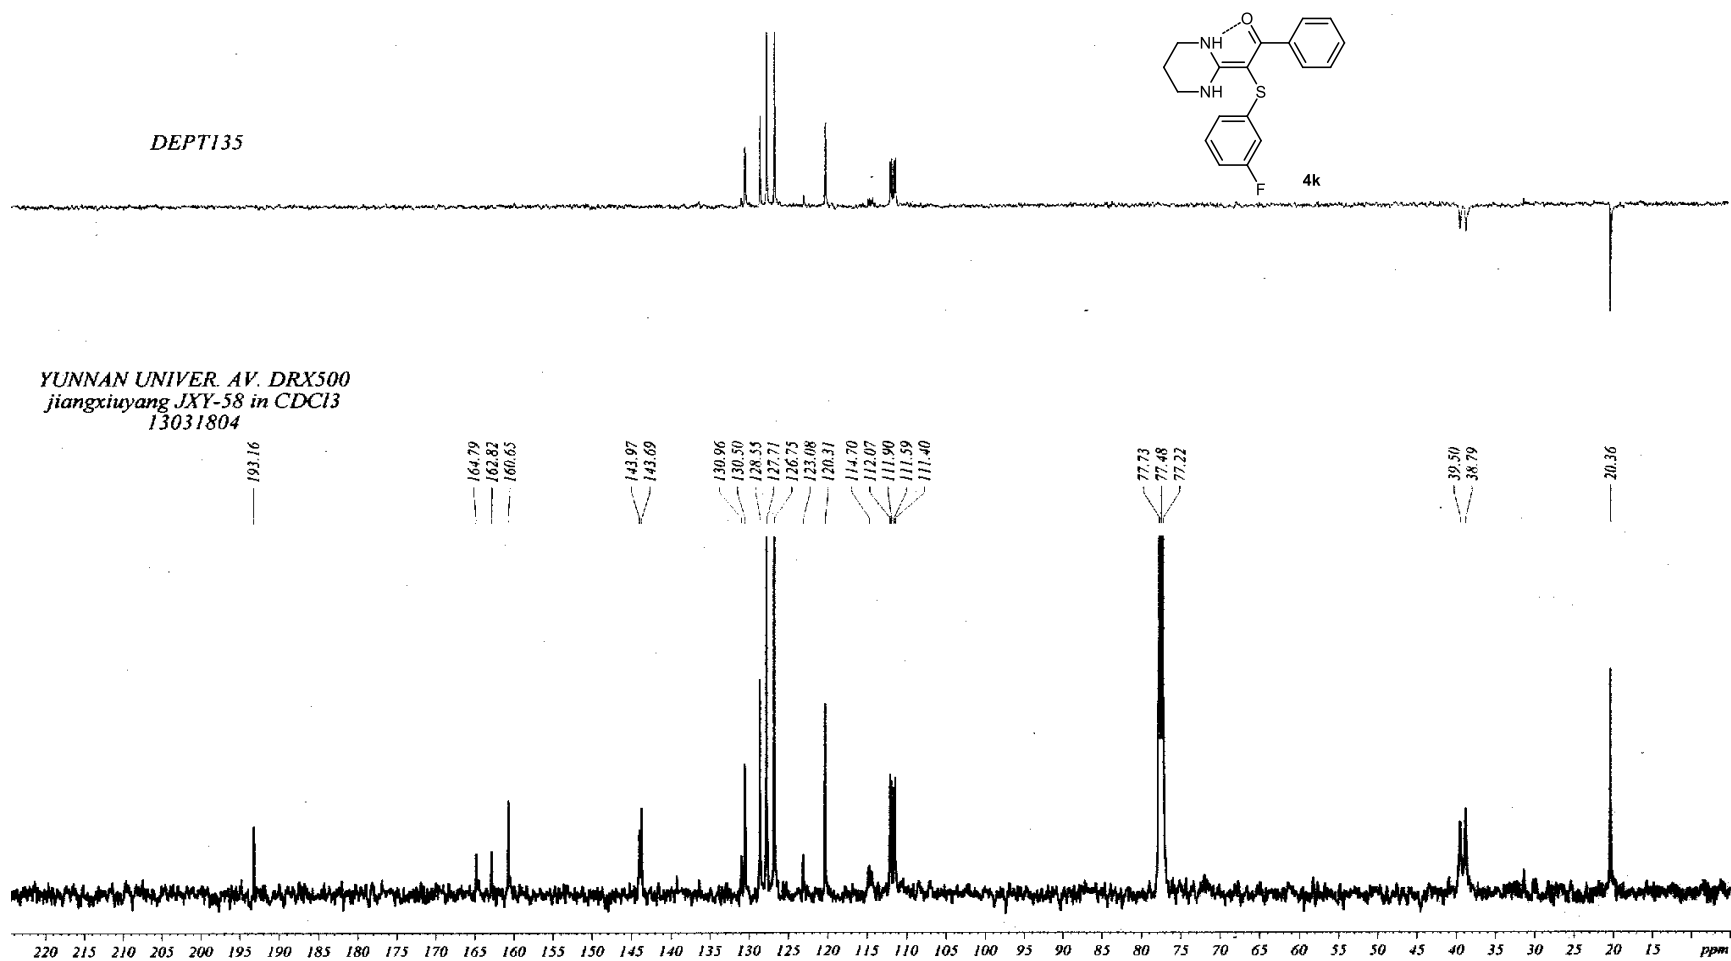

Figure S56. <sup>13</sup>C NMR (125 MHz, CDCl<sub>3</sub>) spectra of compound **4k**



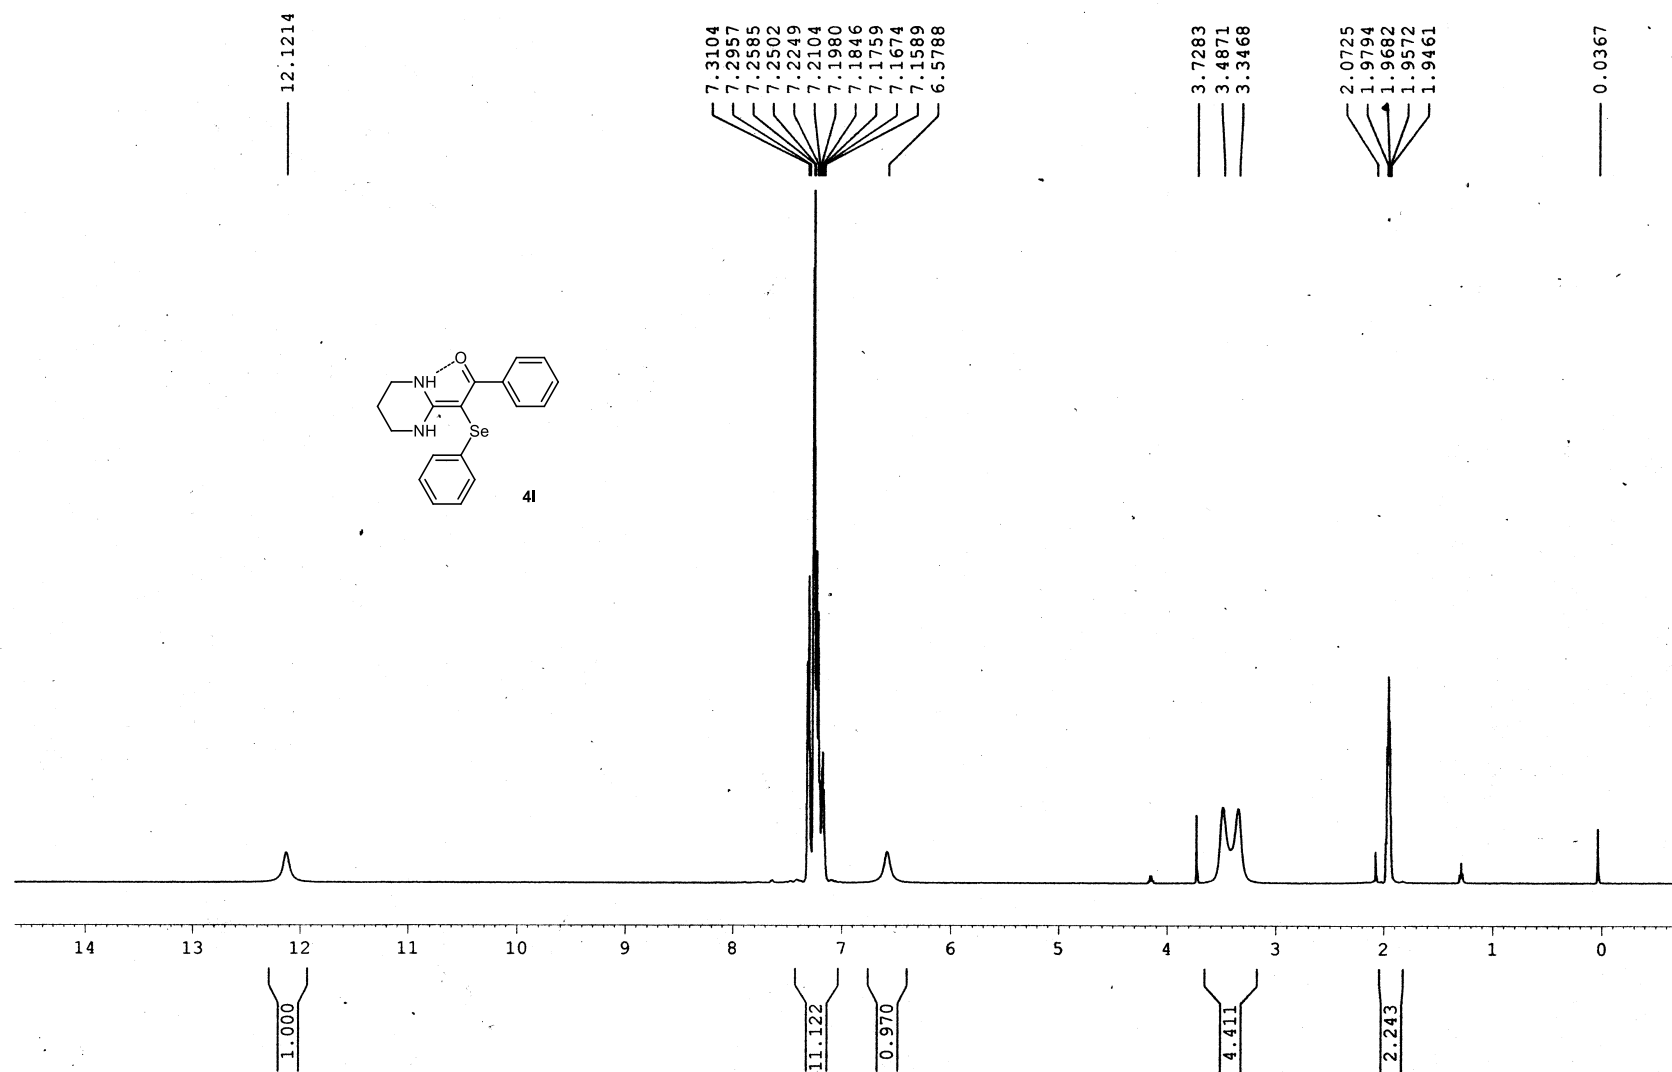

**Figure S57.** <sup>1</sup>H NMR (500 MHz, CDCl<sub>3</sub>) spectra of compound **4l**

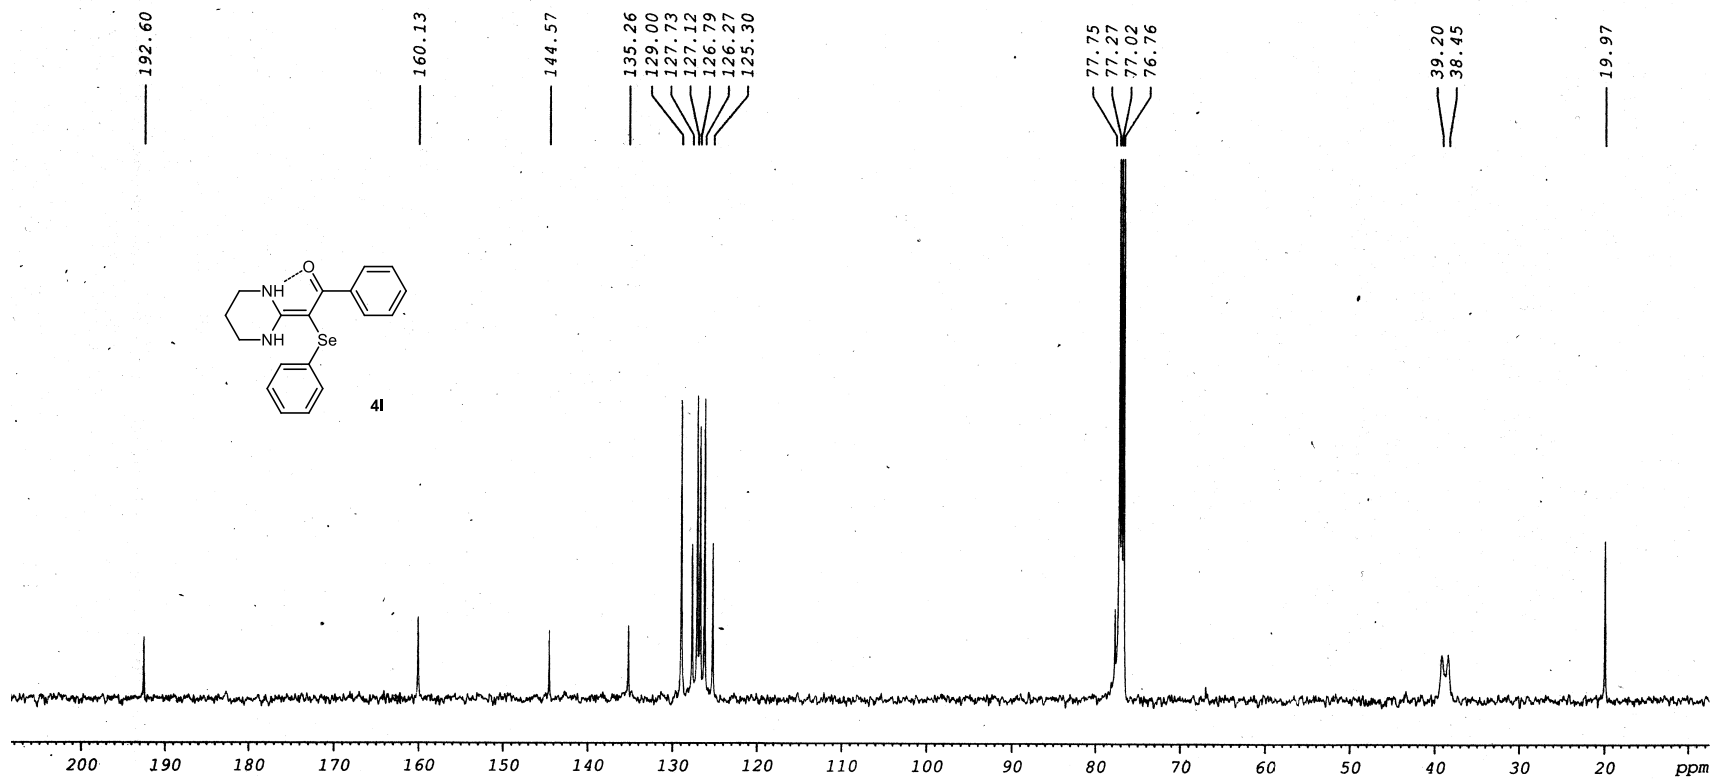

Figure S58.  $^{13}\text{C}$  NMR (125 MHz,  $\text{CDCl}_3$ ) spectra of compound **4I**

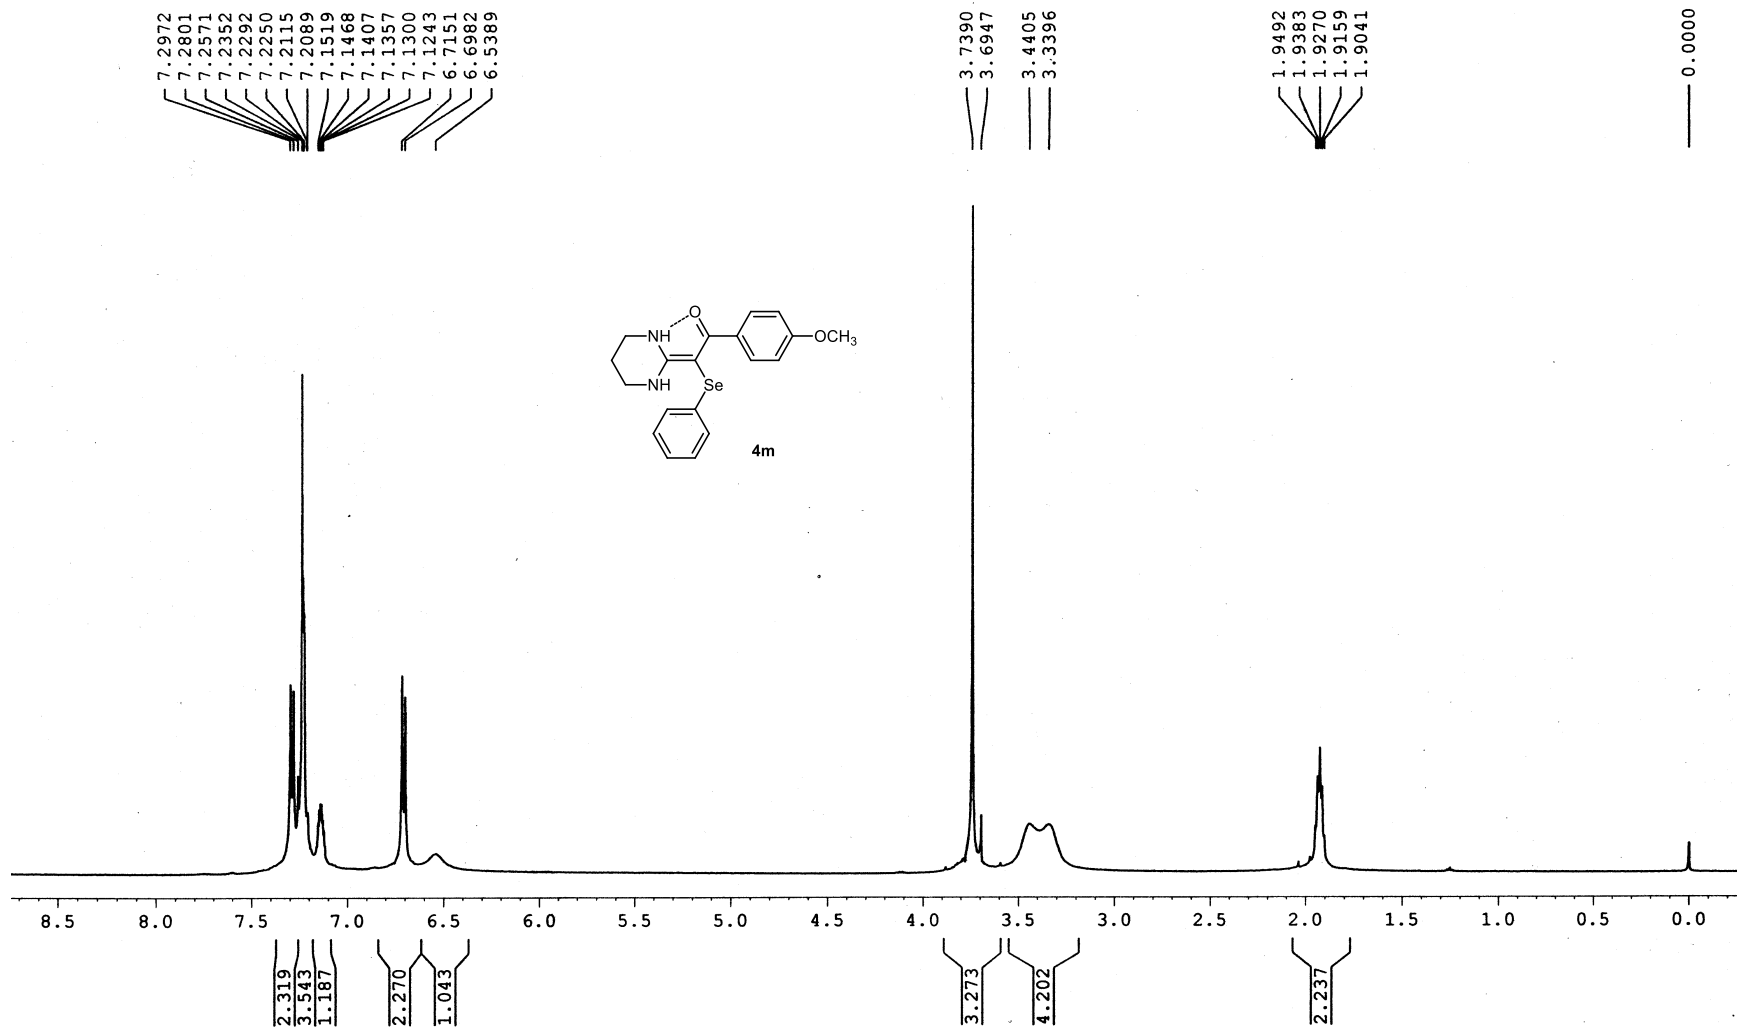

Figure S59. <sup>1</sup>H NMR (500 MHz, CDCl<sub>3</sub>) spectra of compound **4m**

DEPT135

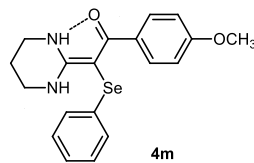

YUNNAN UNIVER. AV. DRX500  
jiangxiuyang JXY-20 in CDCl<sub>3</sub>  
13050702

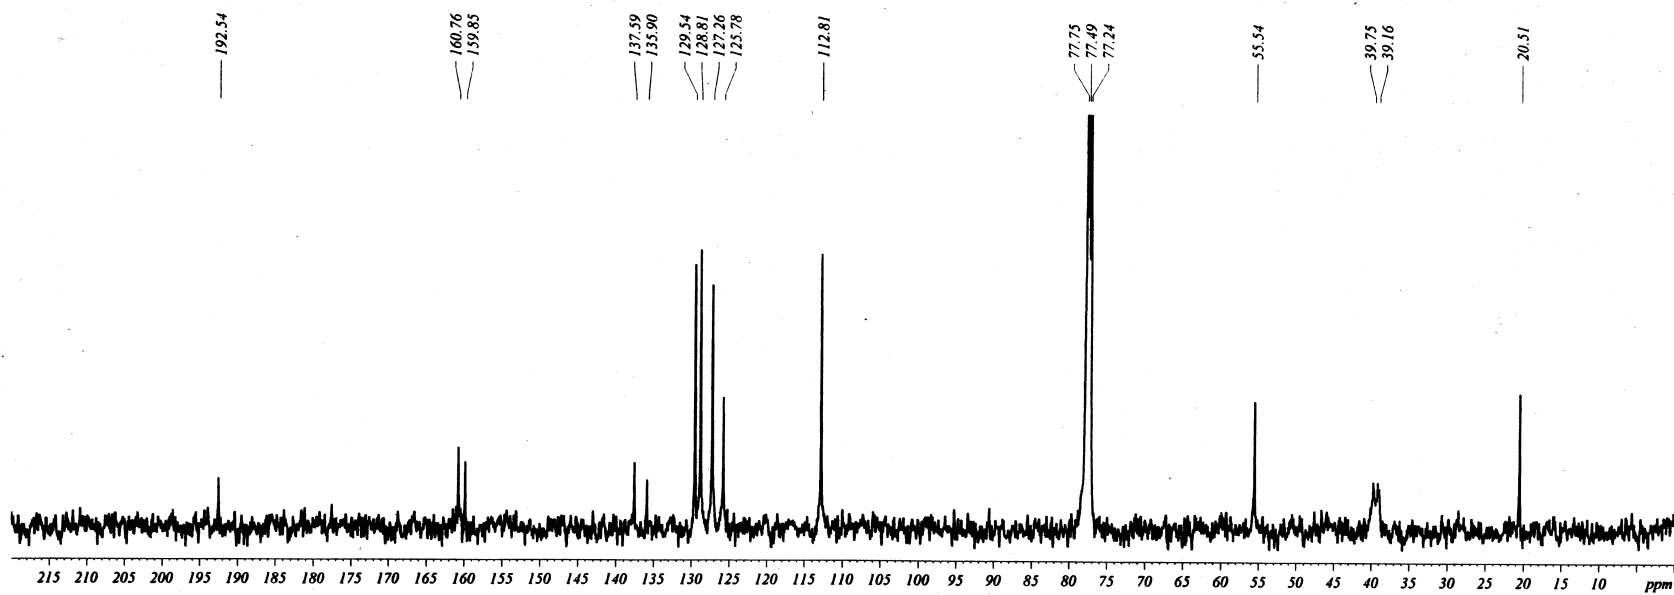

Figure S60. <sup>13</sup>C NMR (125 MHz, CDCl<sub>3</sub>) spectra of compound 4m

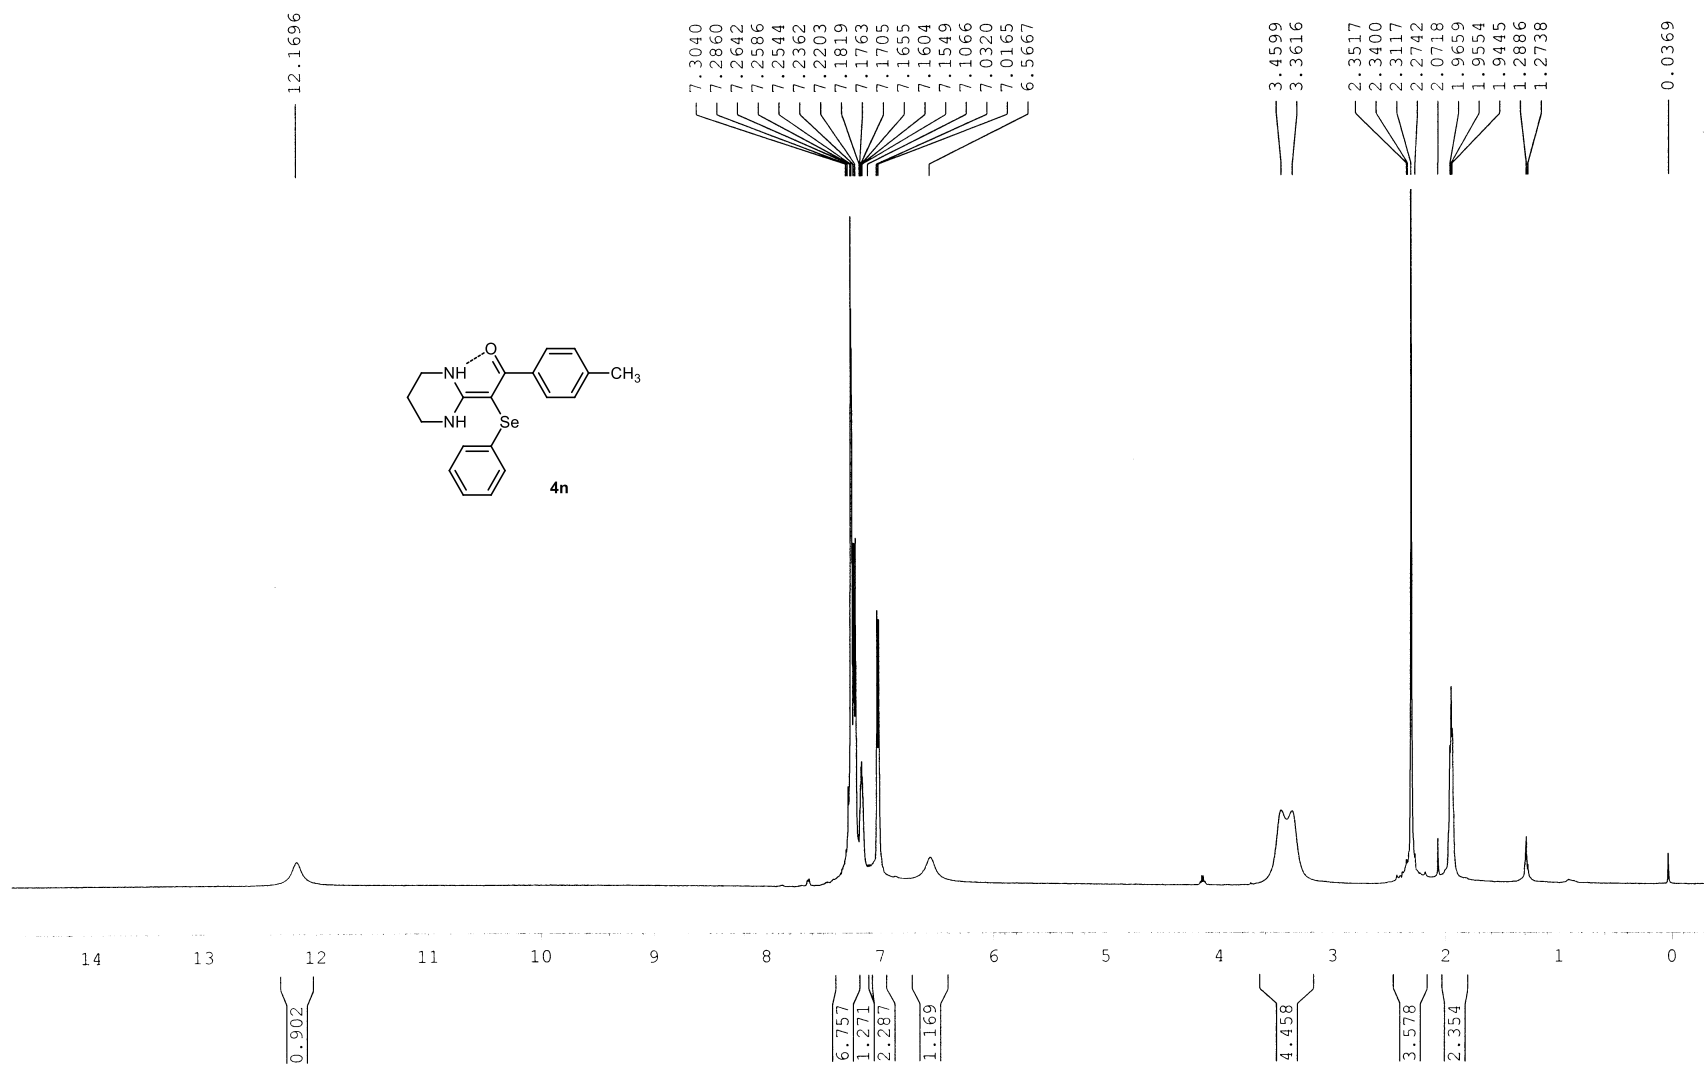

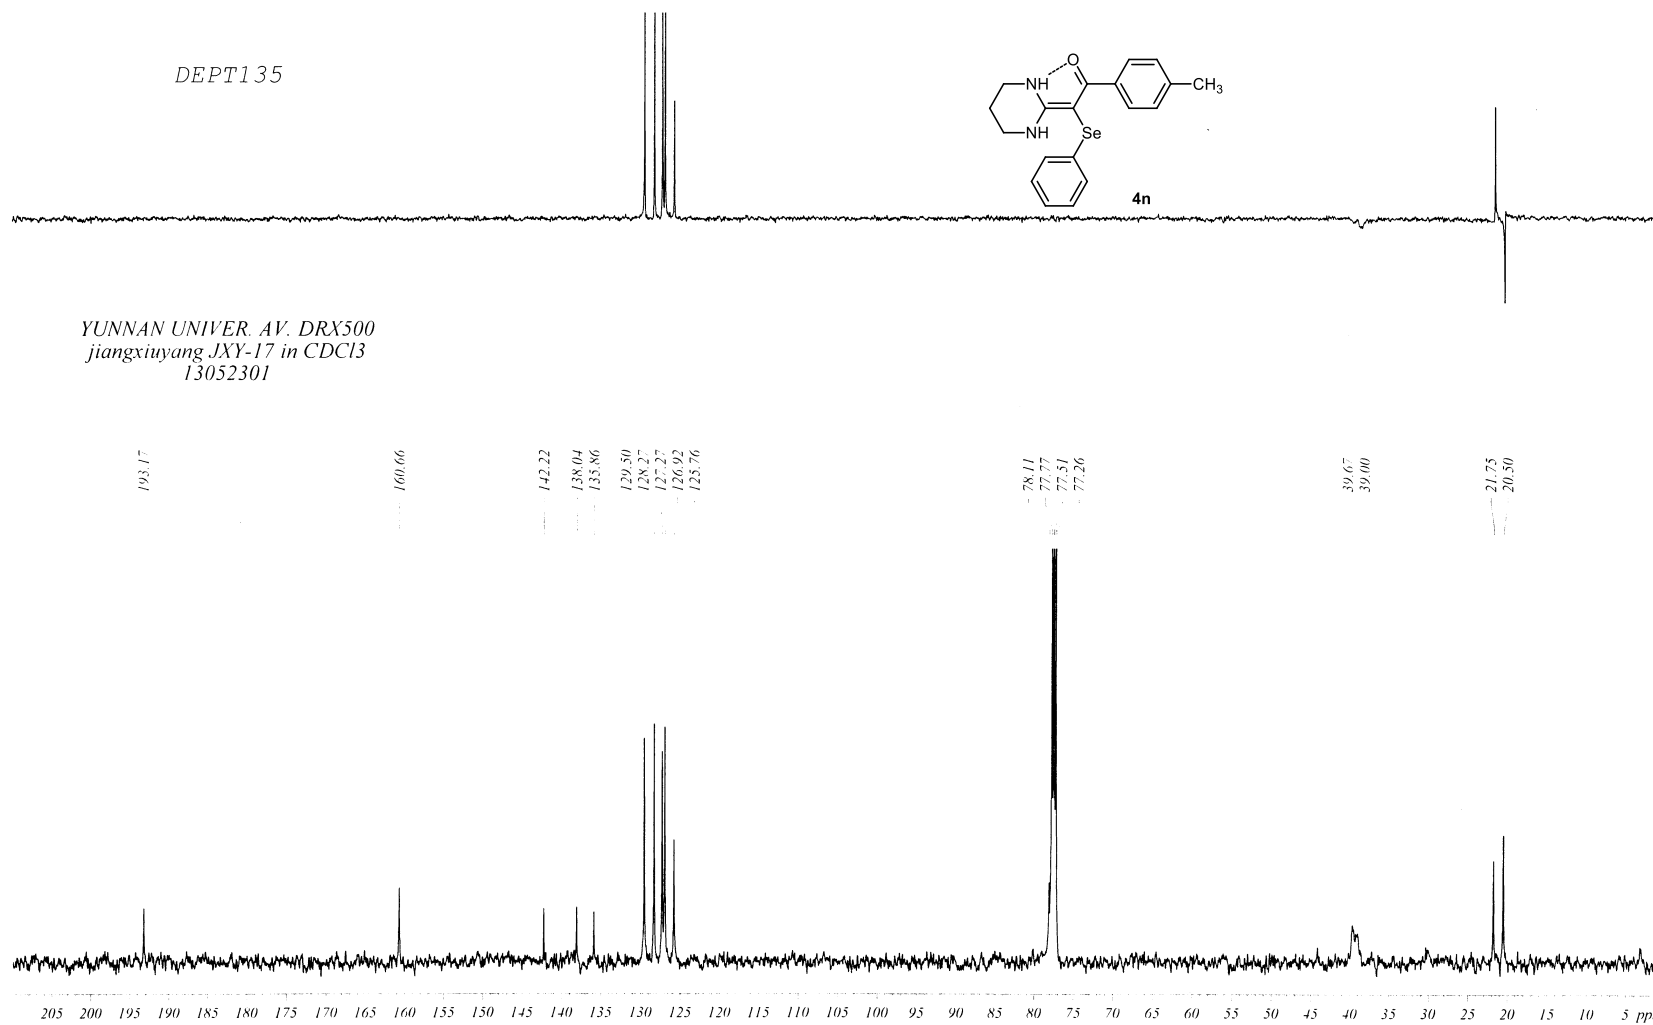

**Figure S62.** <sup>13</sup>C NMR (125 MHz, CDCl<sub>3</sub>) spectra of compound **4n**

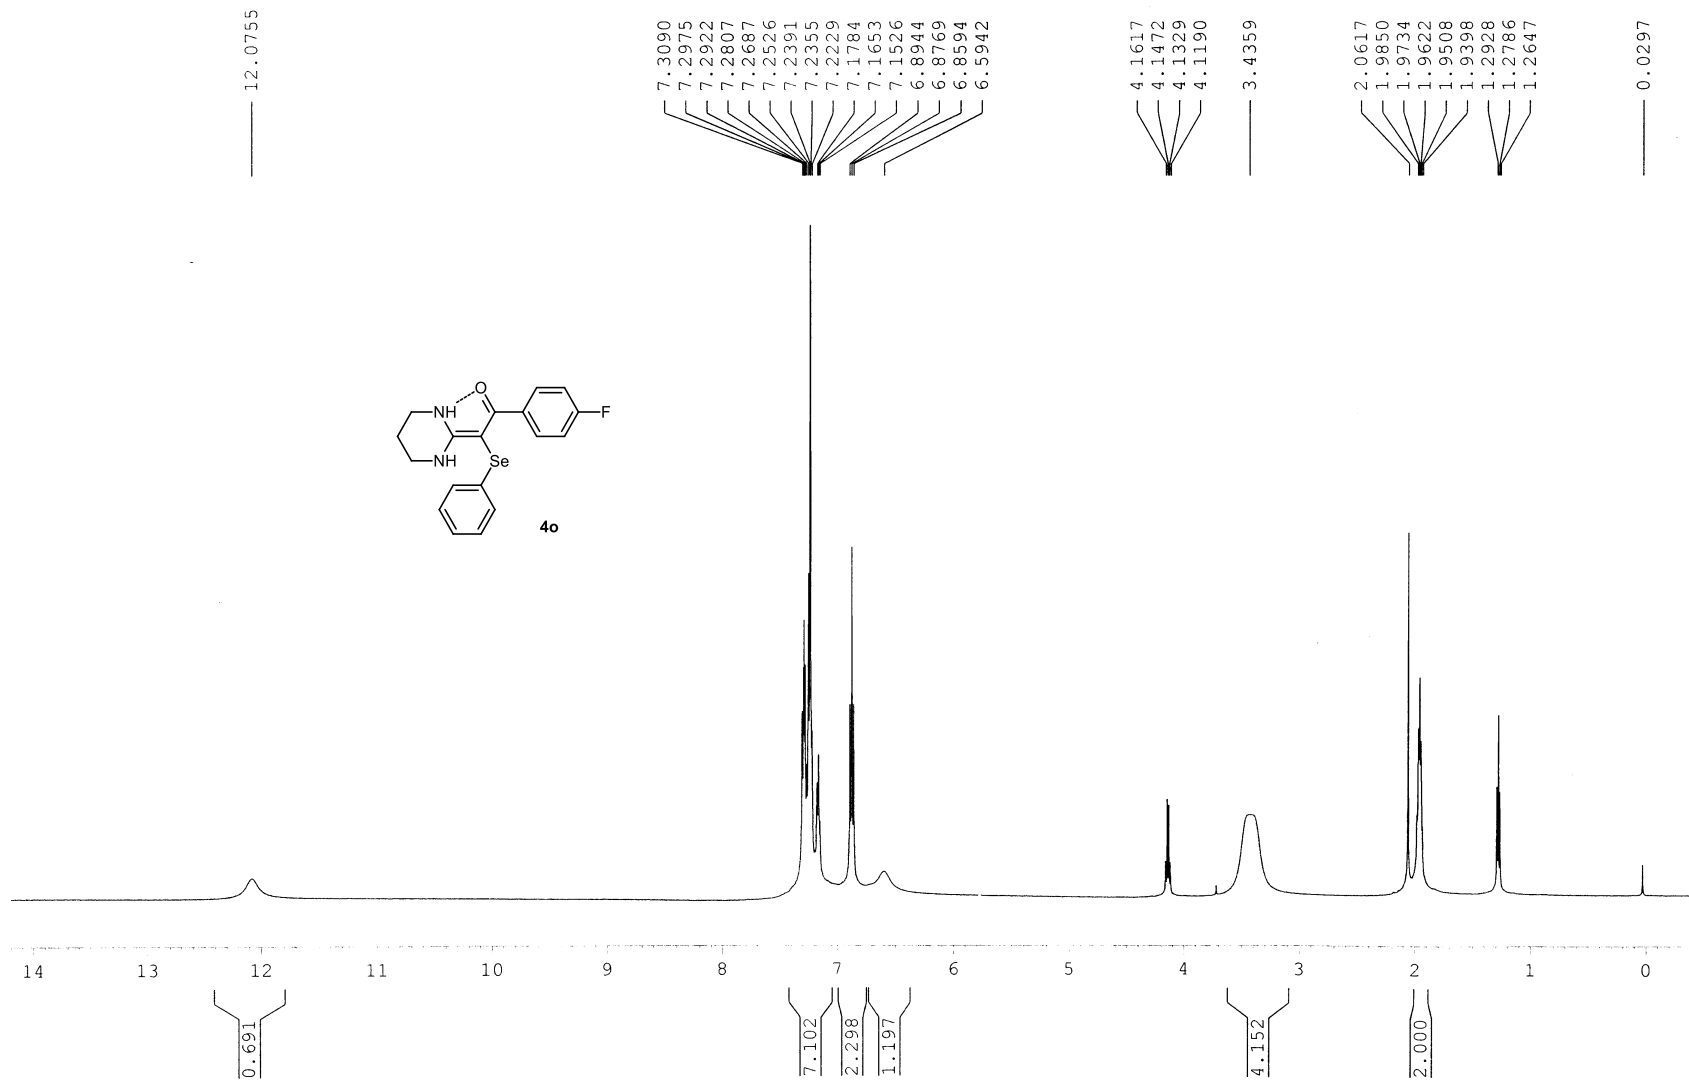

**Figure S63.** <sup>1</sup>H NMR (500 MHz, CDCl<sub>3</sub>) spectra of compound **4o**

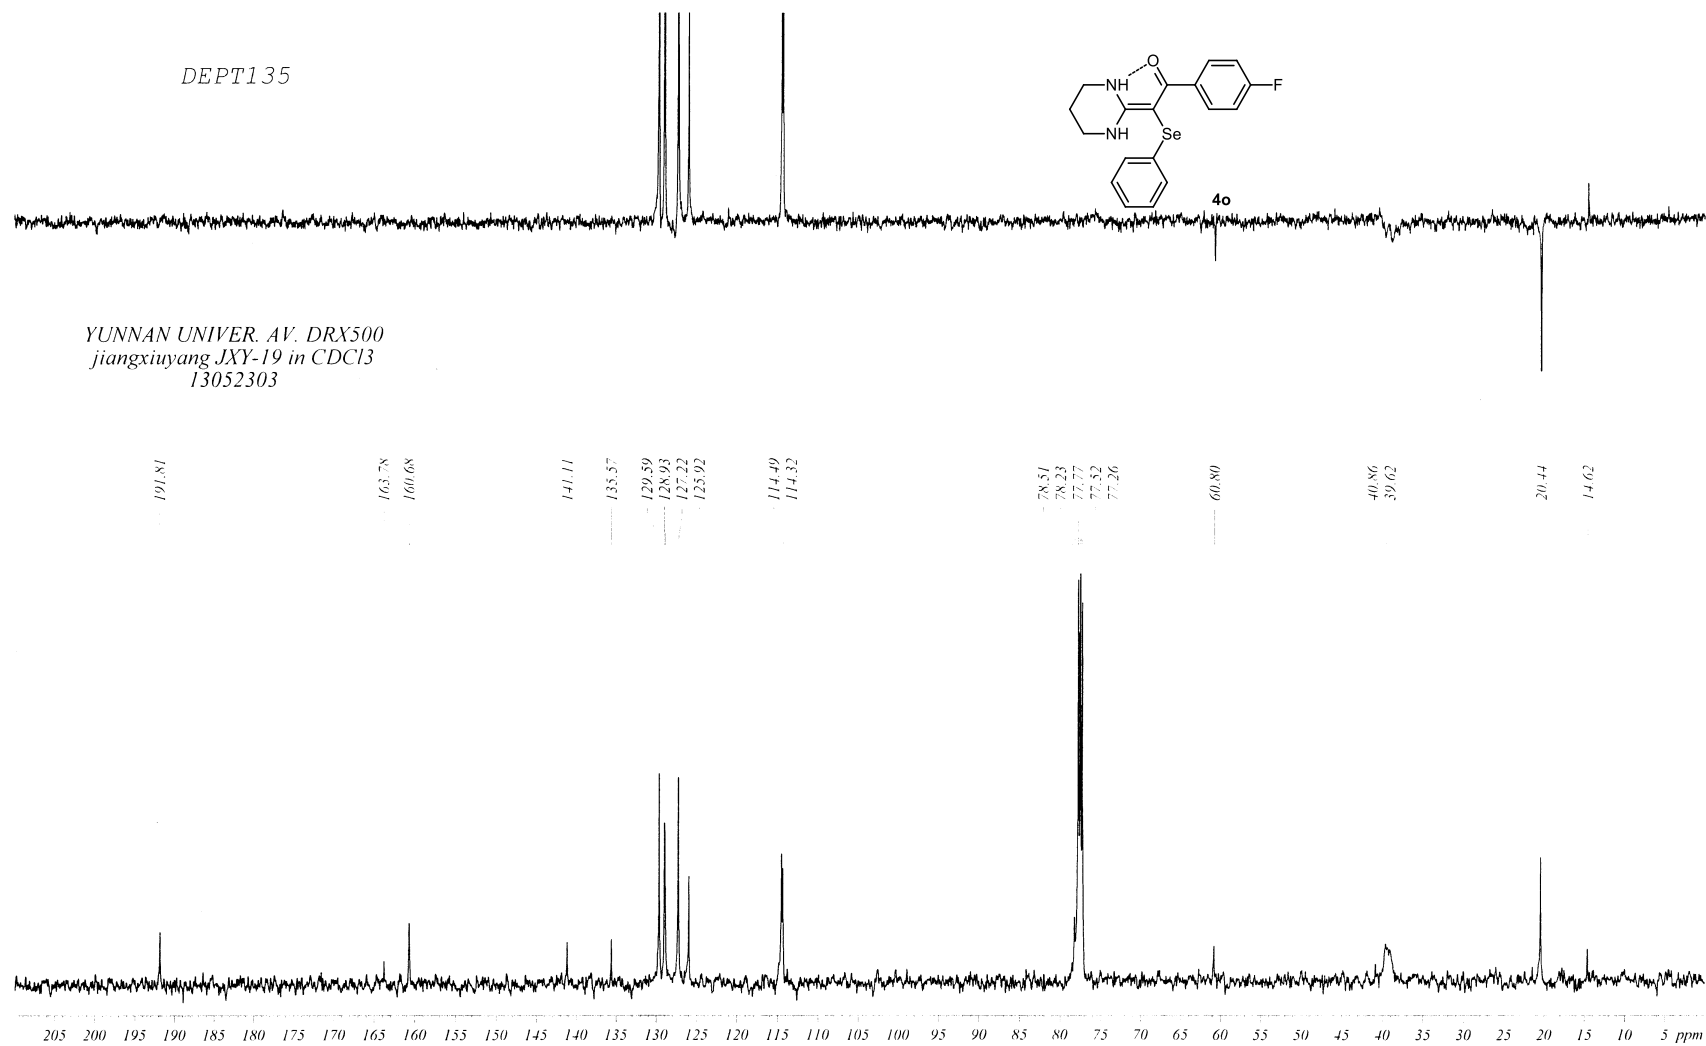

Figure S64. <sup>13</sup>C NMR (125 MHz, CDCl<sub>3</sub>) spectra of compound **4o**



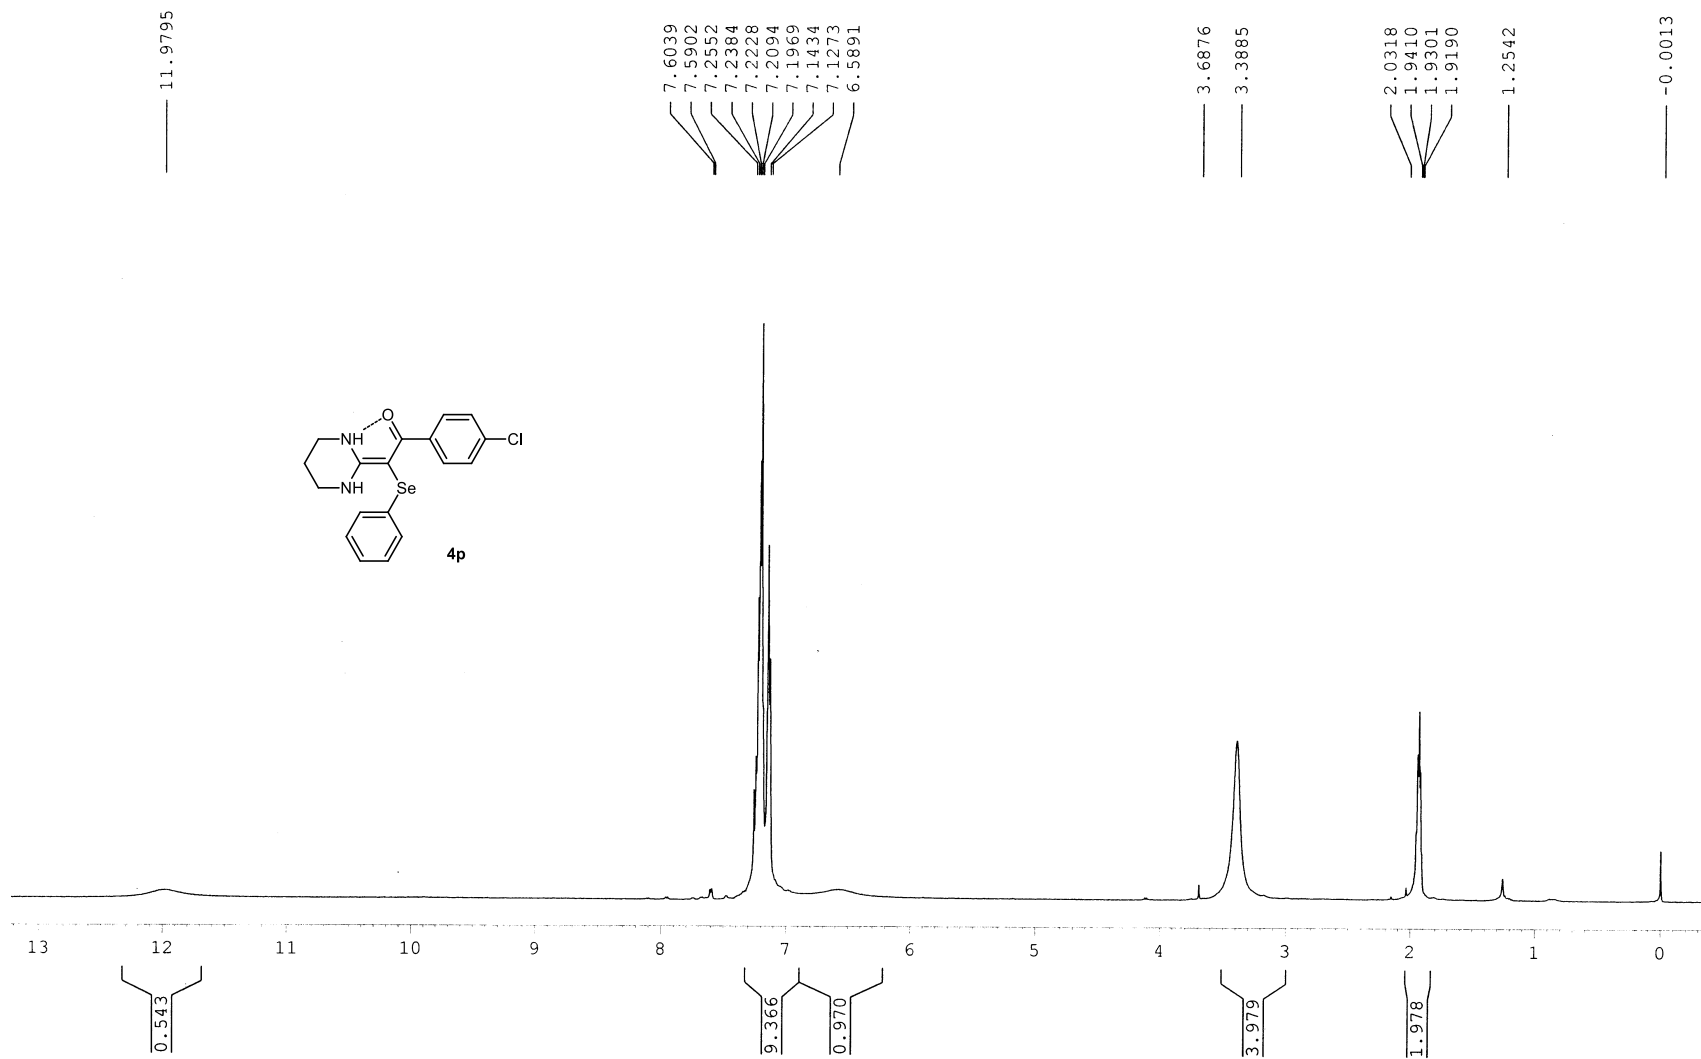

**Figure S65.** <sup>1</sup>H NMR (500 MHz, CDCl<sub>3</sub>) spectra of compound **4p**

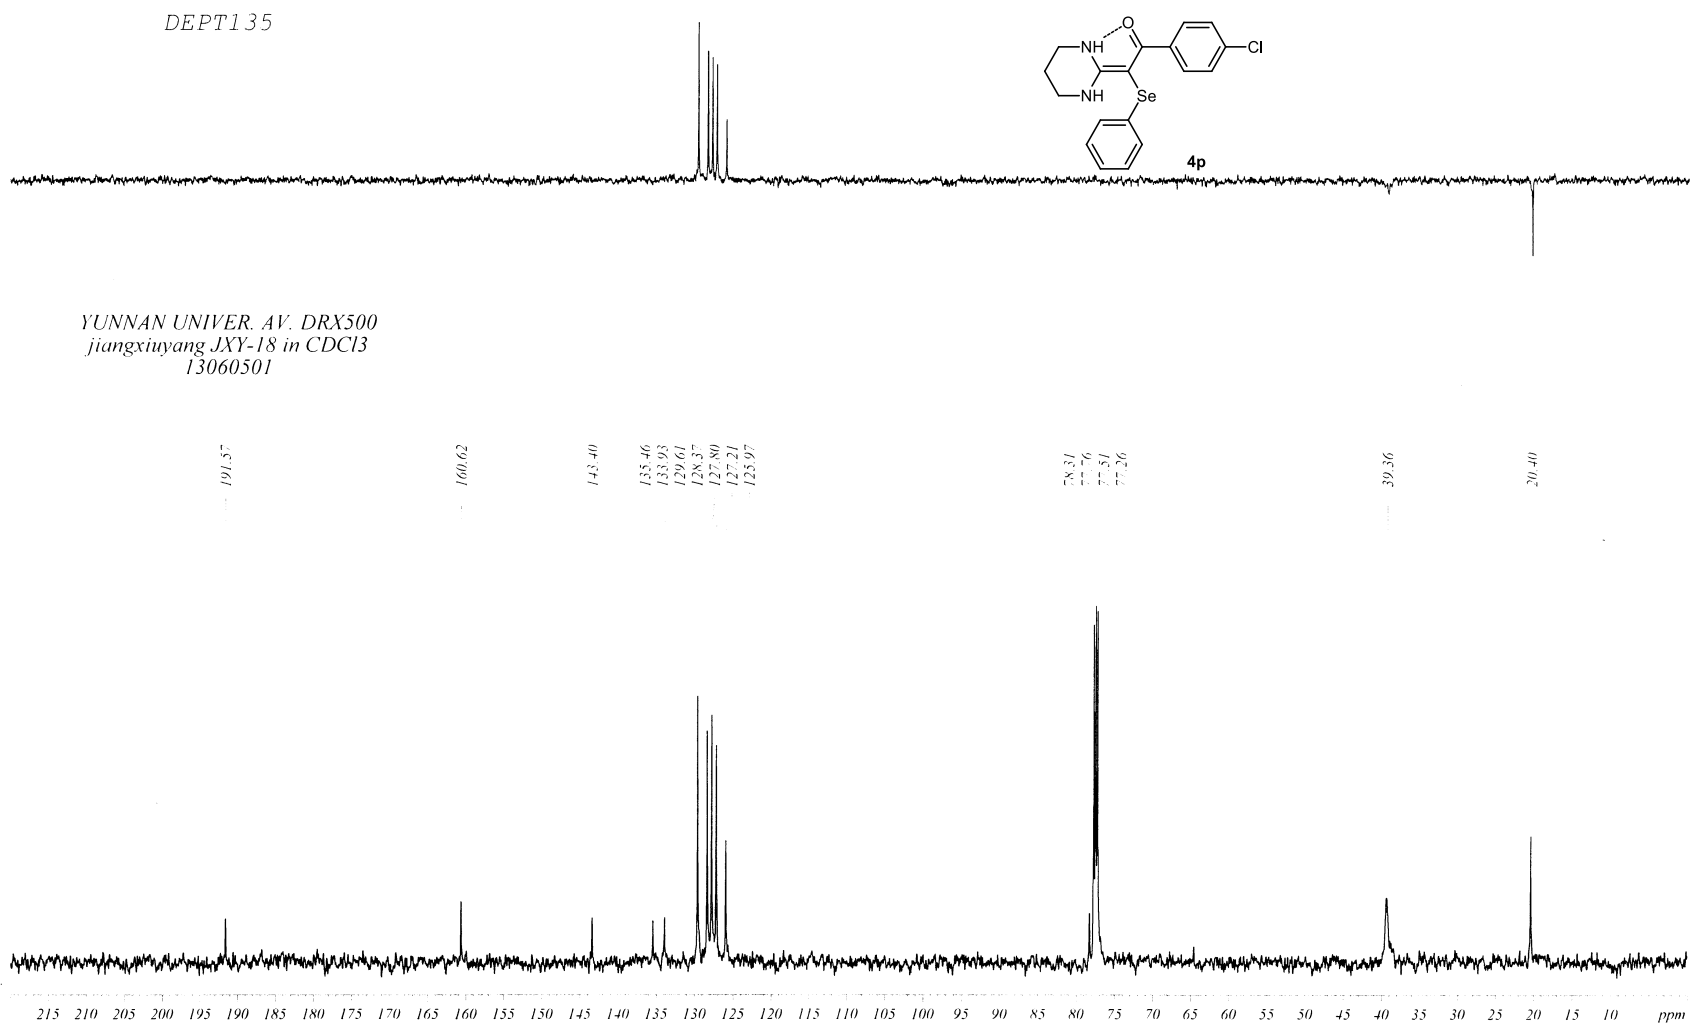

Figure S66.  $^{13}\text{C}$  NMR (125 MHz,  $\text{CDCl}_3$ ) spectra of compound **4p**

YUNNAN UNIVER. AV. DRX500  
jiangxiuyang JXY-A-8 in CDCl<sub>3</sub>  
13050901

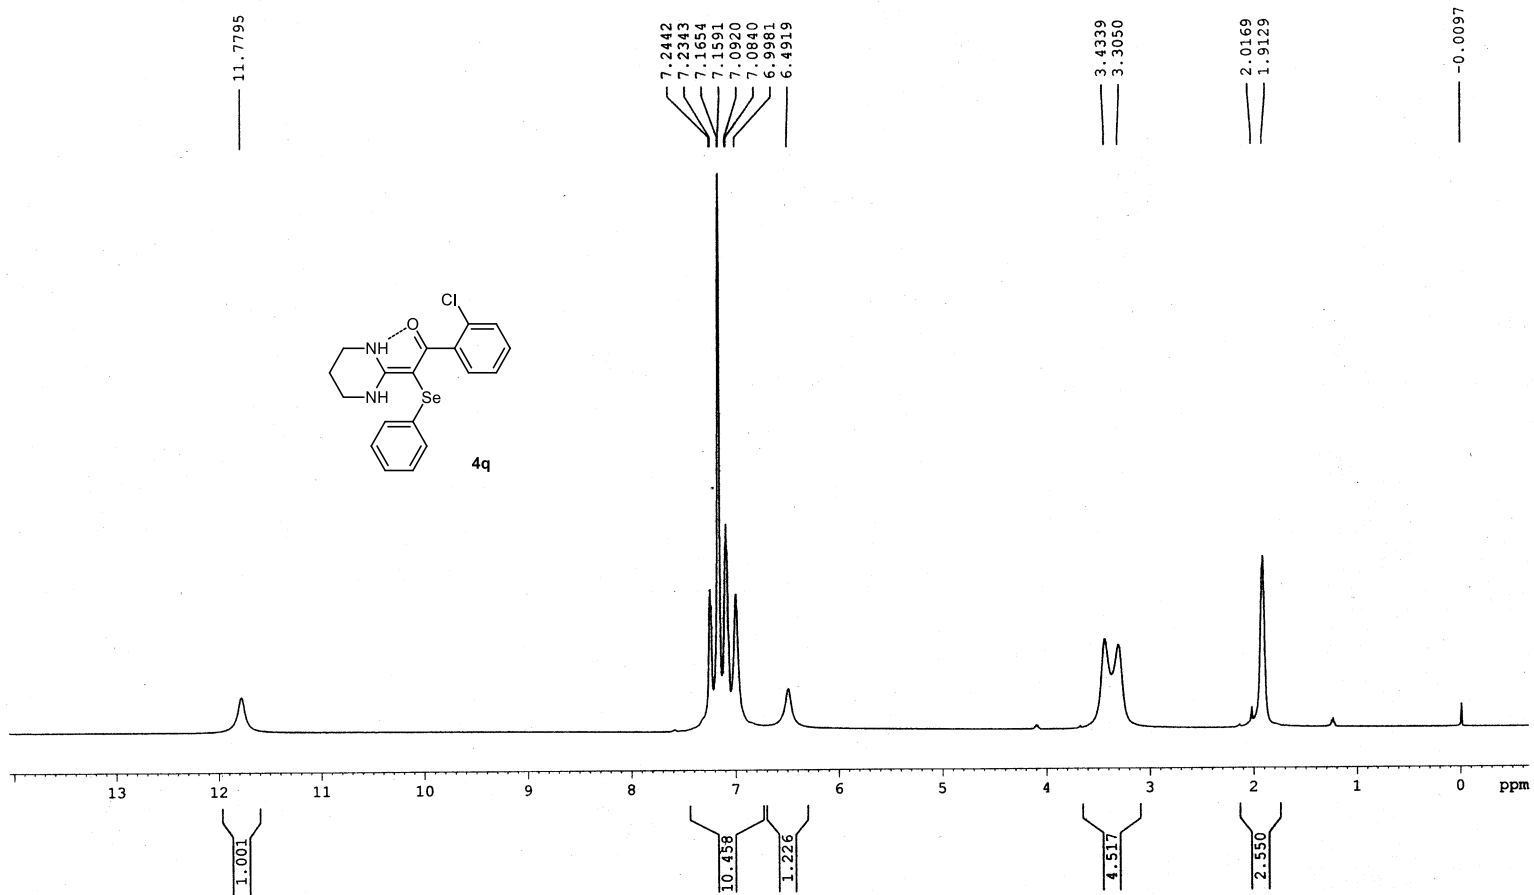

Figure S67. <sup>1</sup>H NMR (500 MHz, CDCl<sub>3</sub>) spectra of compound **4q**

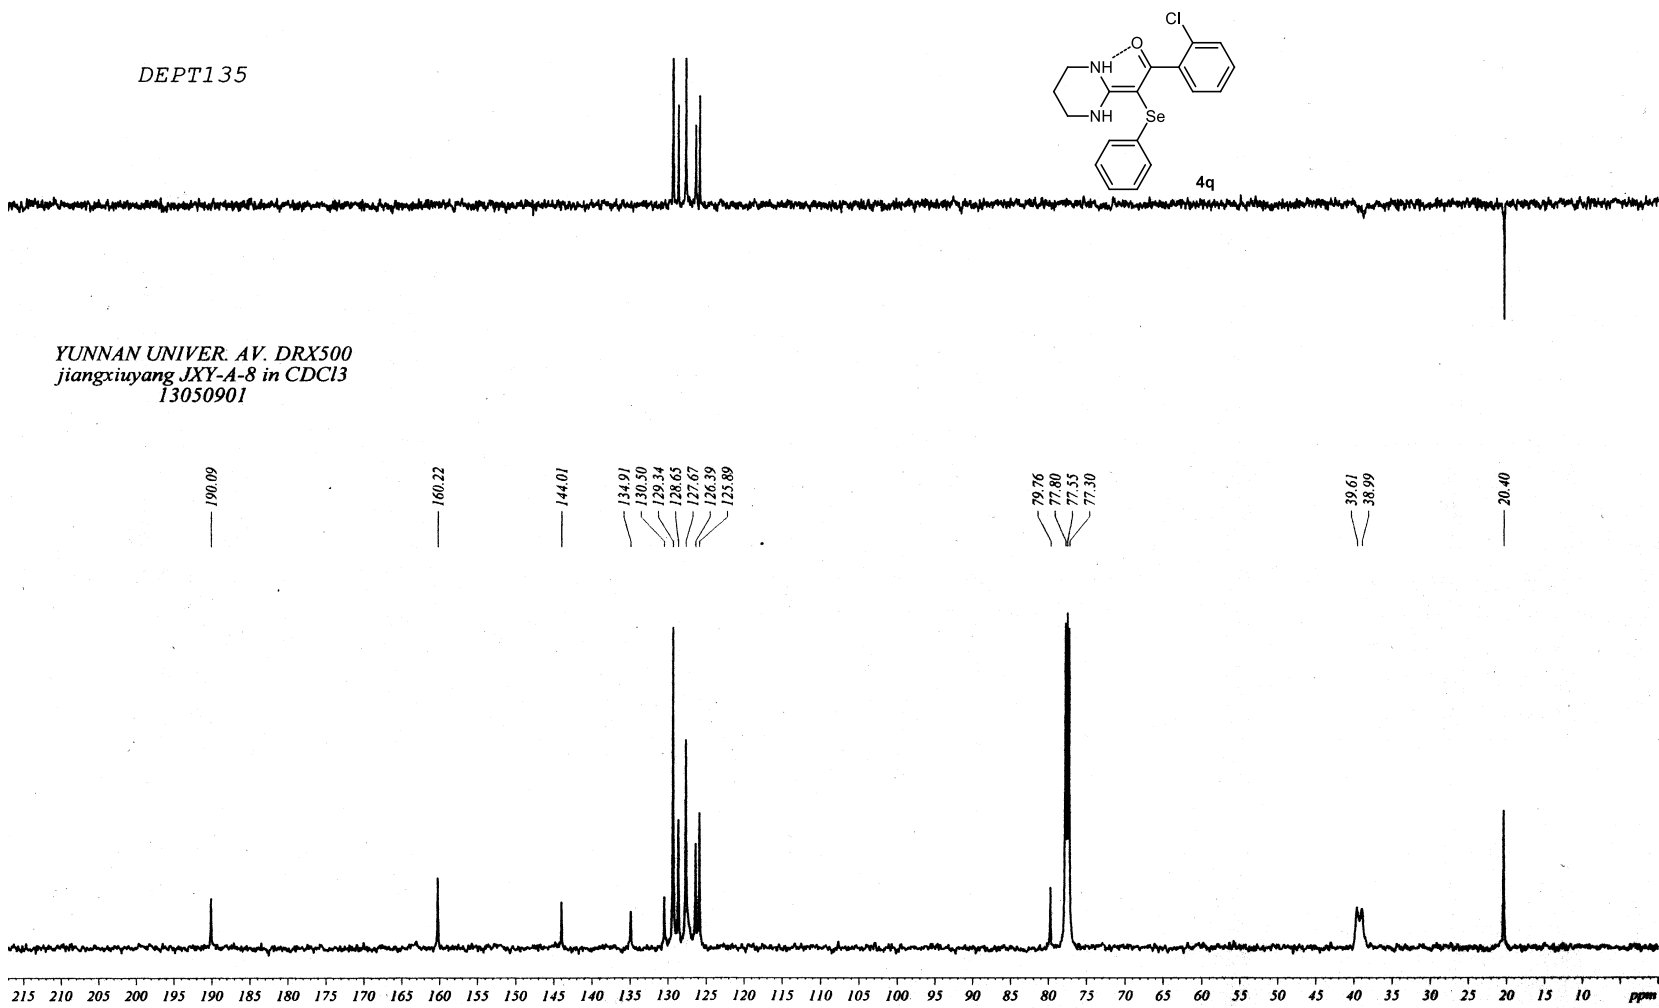

Figure S68. <sup>13</sup>C NMR (125 MHz, CDCl<sub>3</sub>) spectra of compound 4q

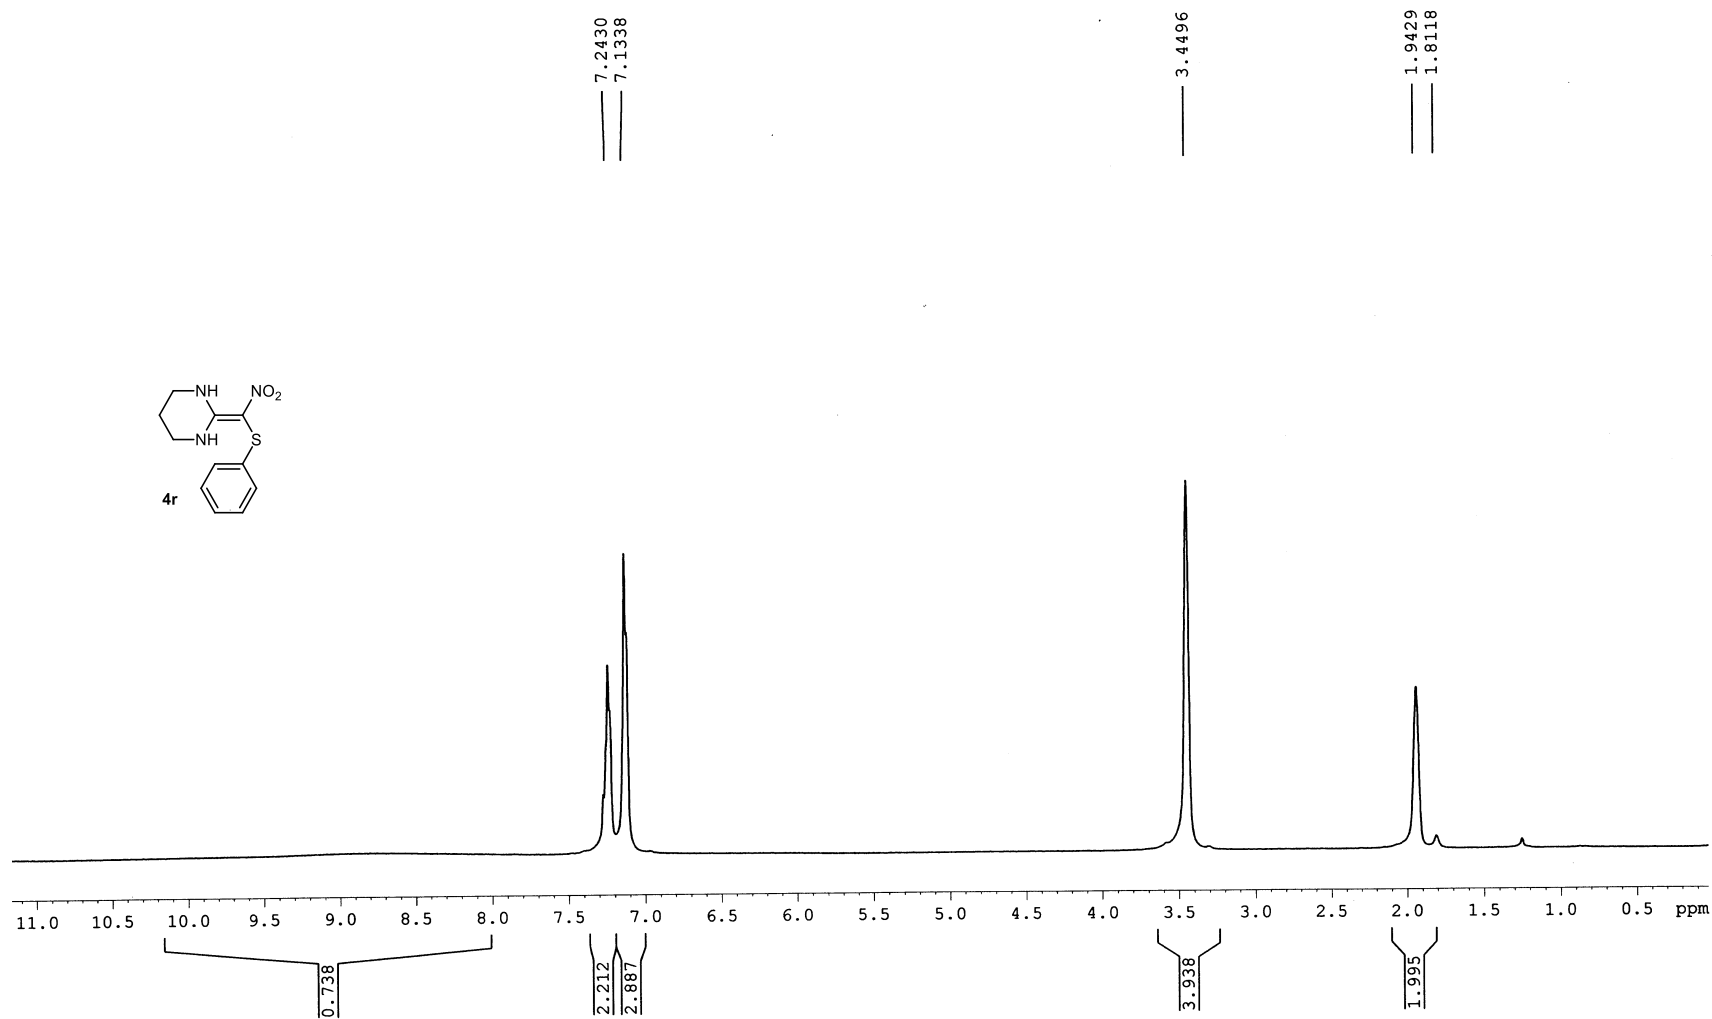

Figure S69. <sup>1</sup>H NMR (500 MHz, CDCl<sub>3</sub>) spectra of compound **4r**

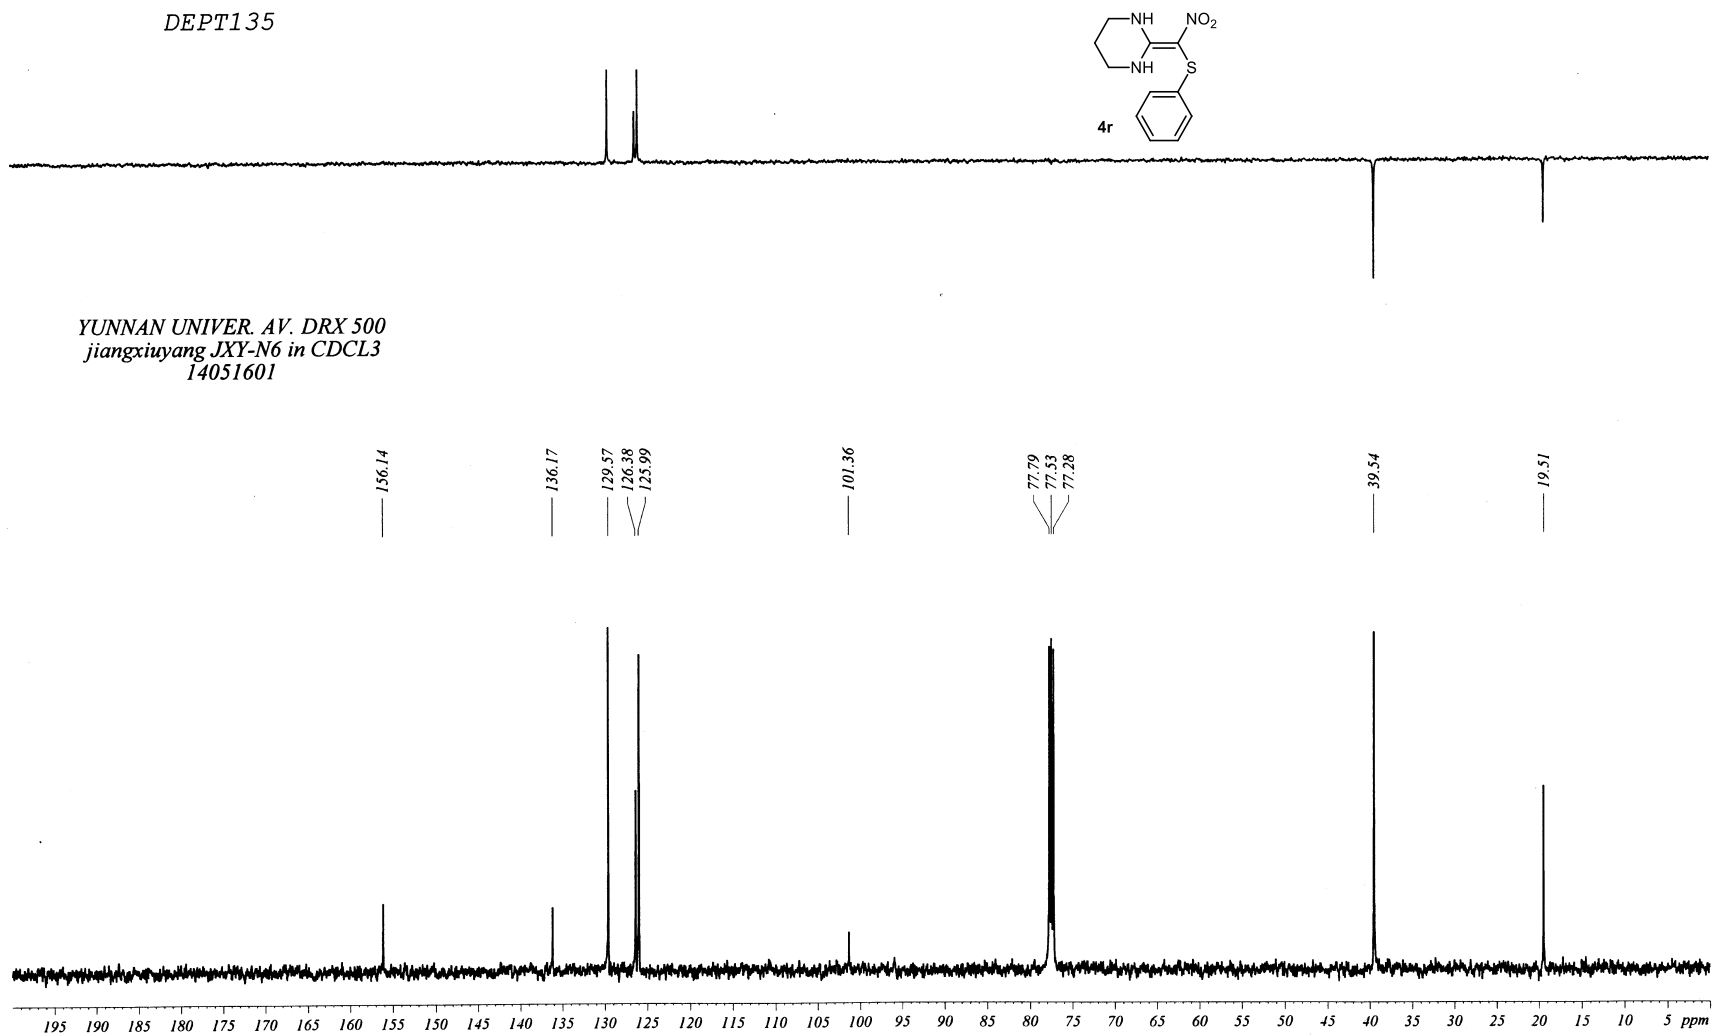

Figure S70.  $^{13}\text{C}$  NMR (125 MHz,  $\text{CDCl}_3$ ) spectra of compound **4r**

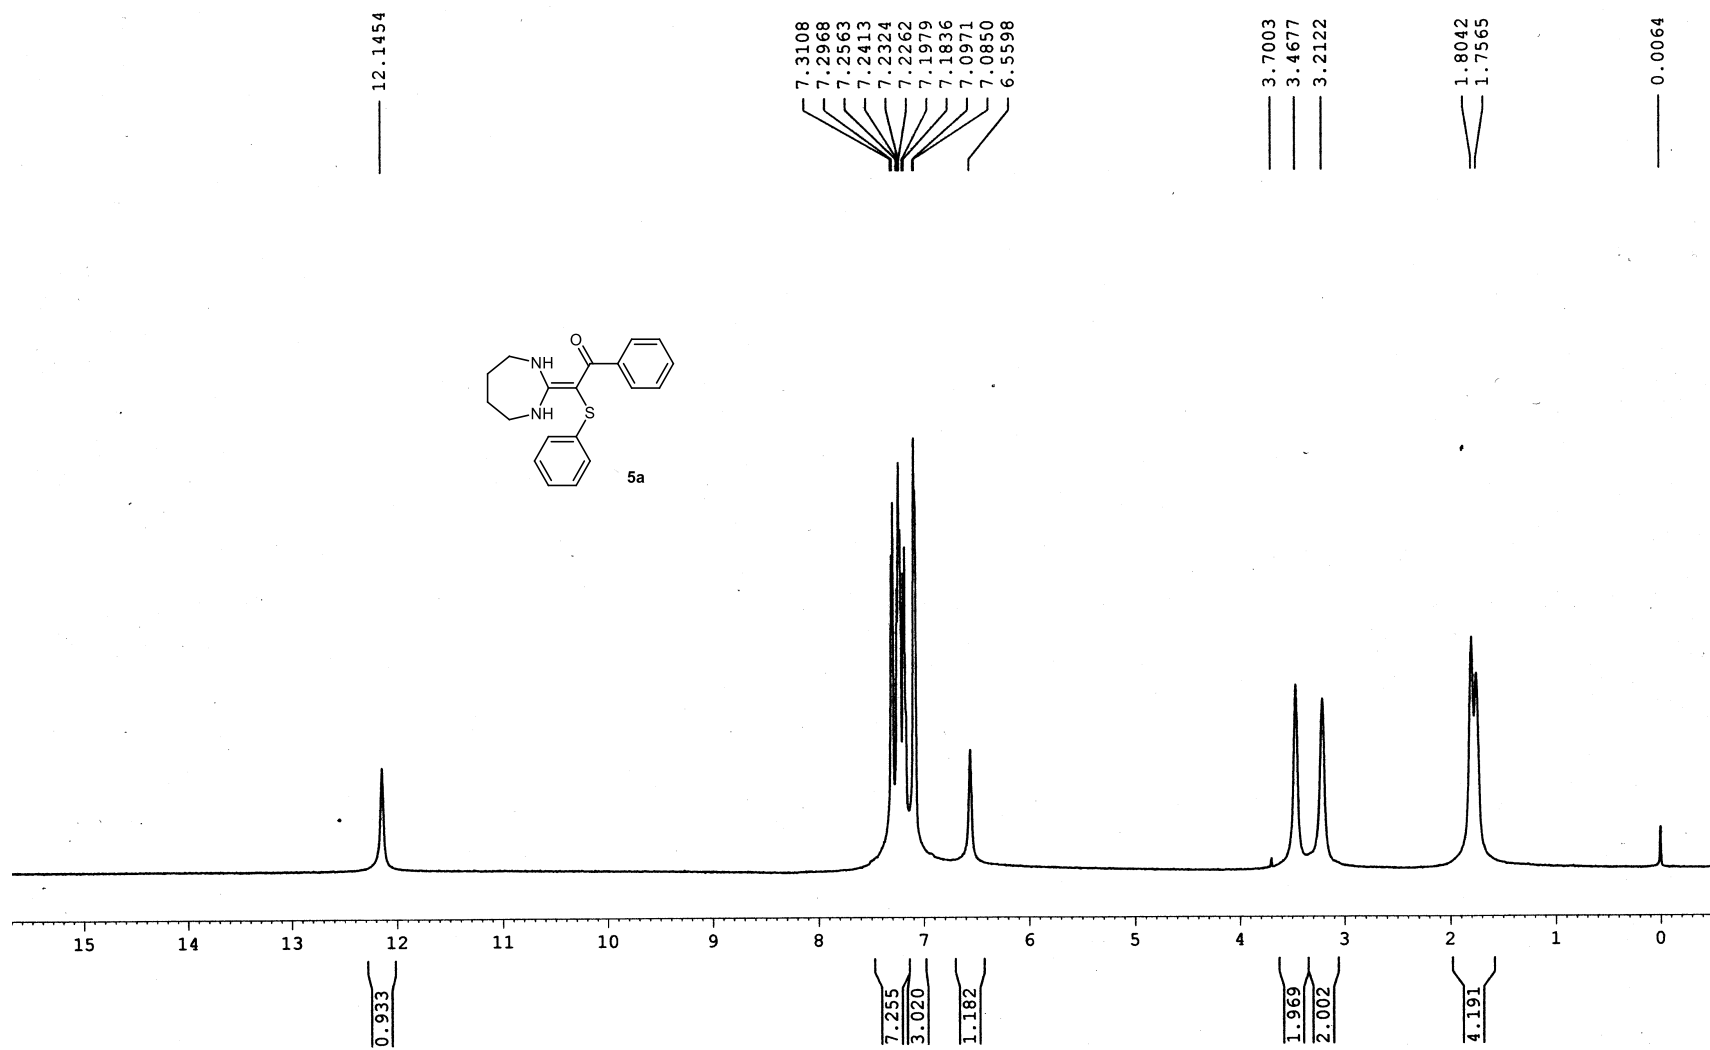

**Figure S71.** <sup>1</sup>H NMR (500 MHz, CDCl<sub>3</sub>) spectra of compound **5a**

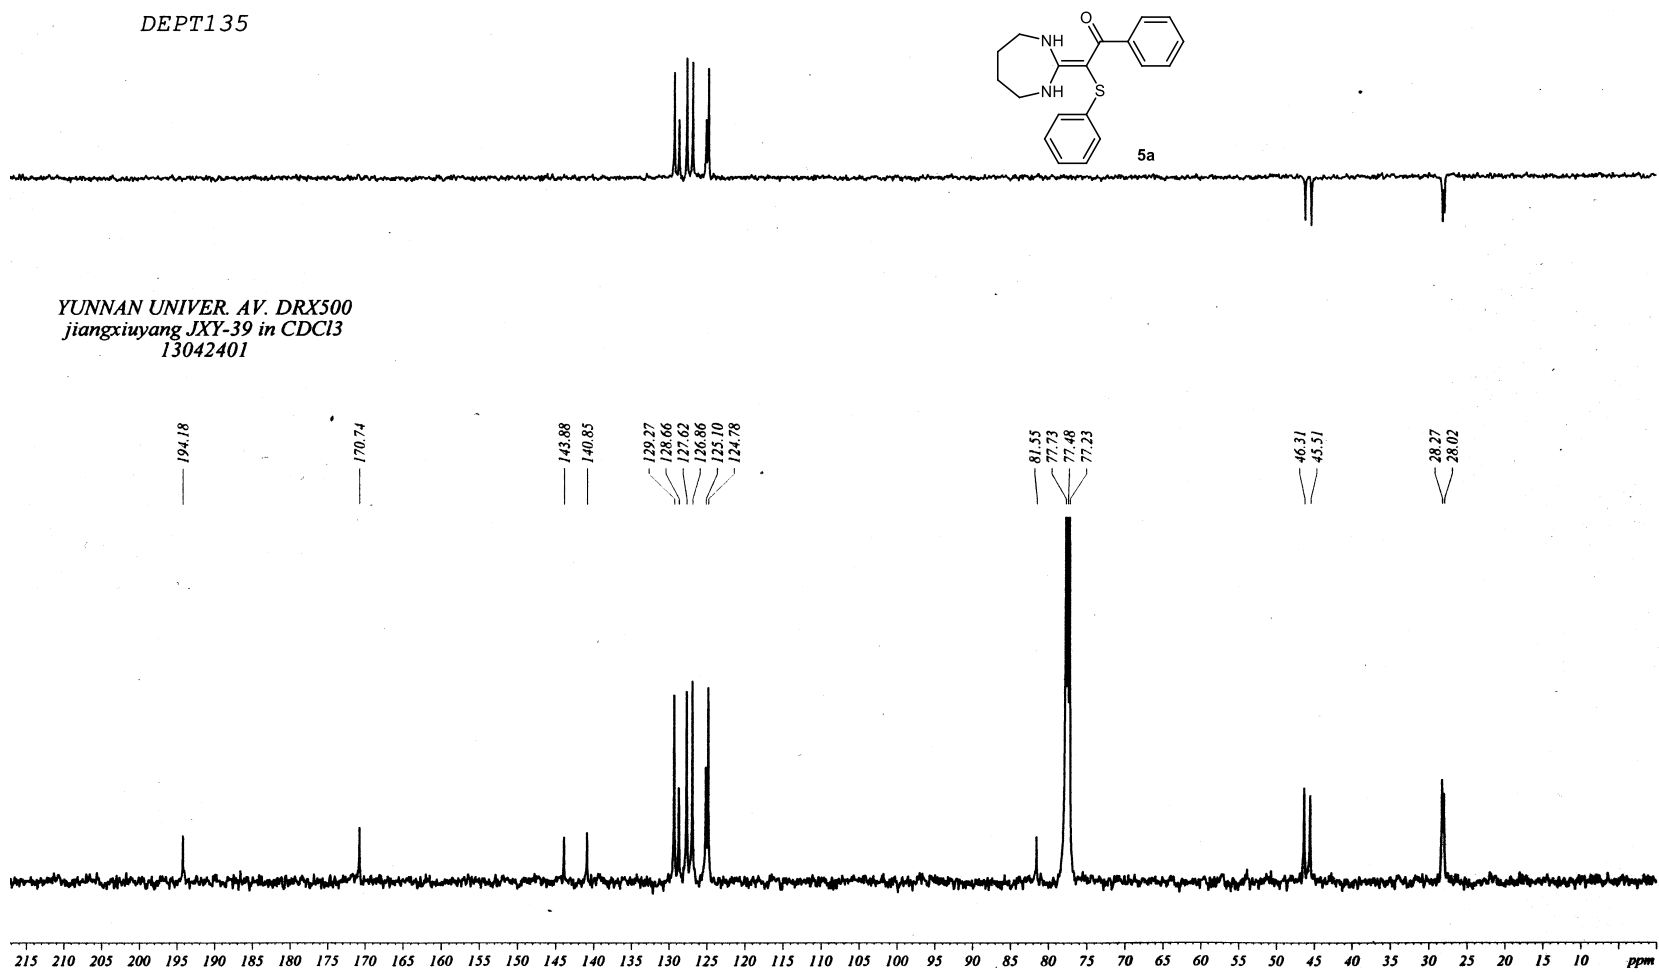

Figure S72.  $^{13}\text{C}$  NMR (125 MHz,  $\text{CDCl}_3$ ) spectra of compound **5a**



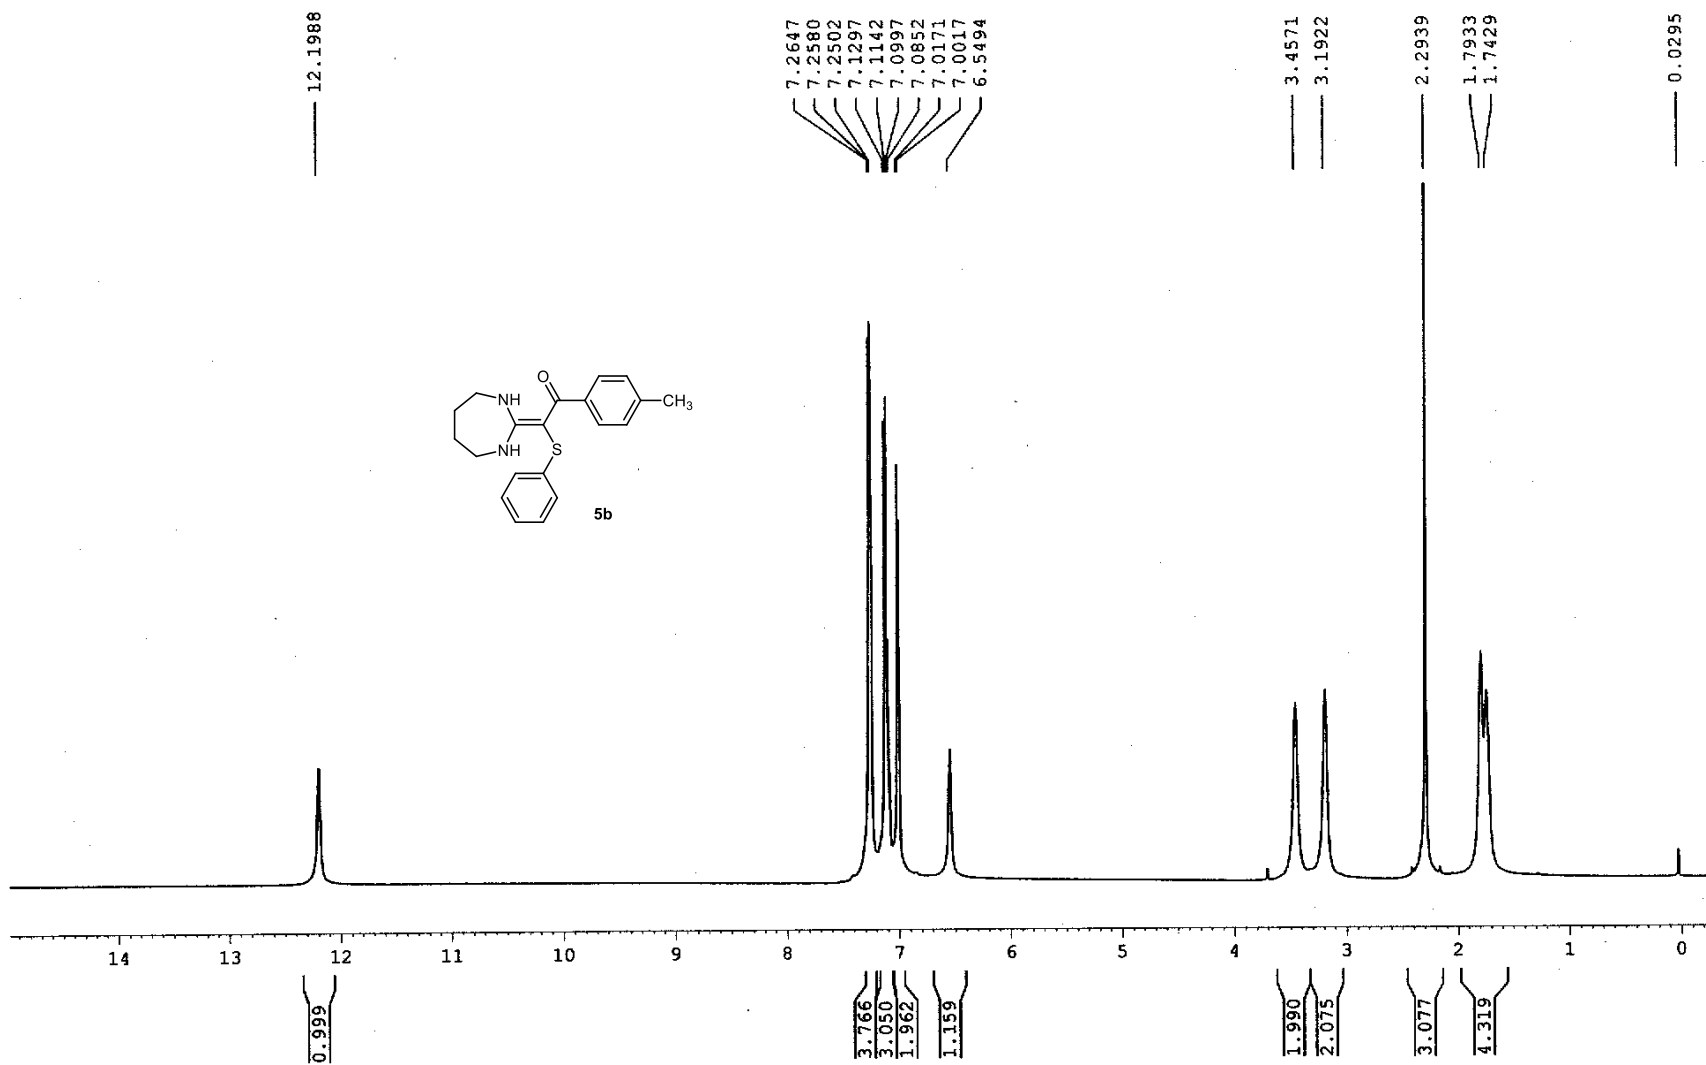

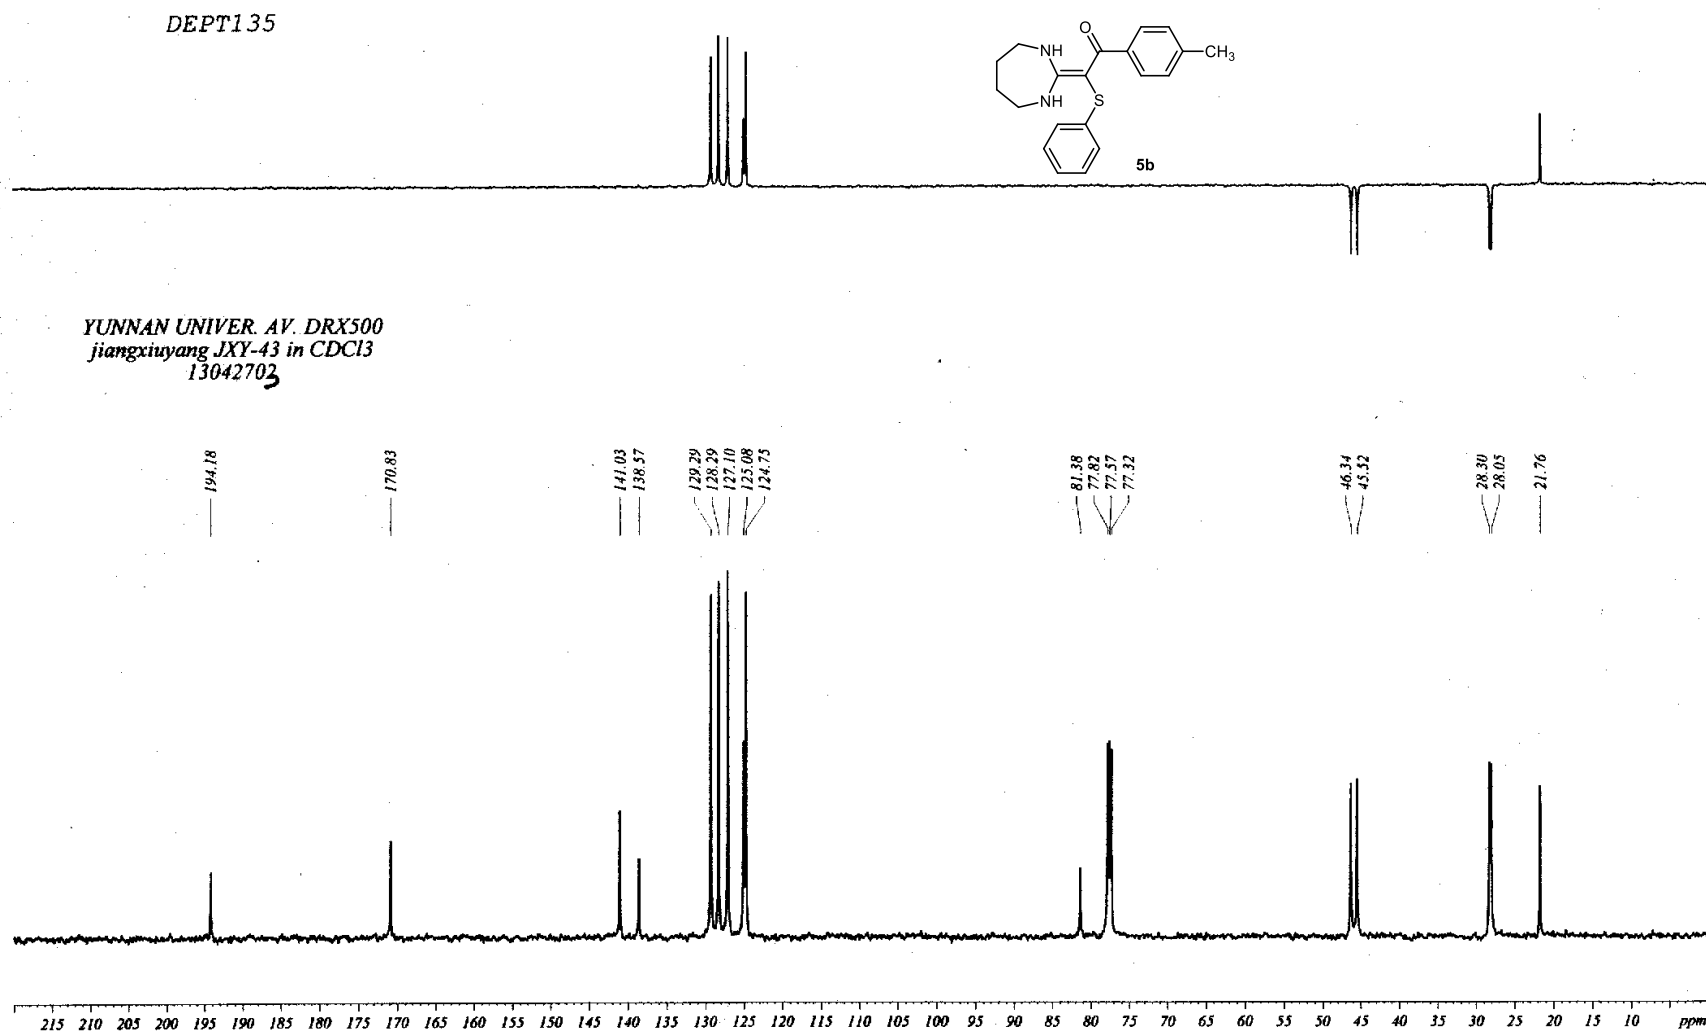

Figure S74. <sup>13</sup>C NMR (125 MHz, CDCl<sub>3</sub>) spectra of compound 5b

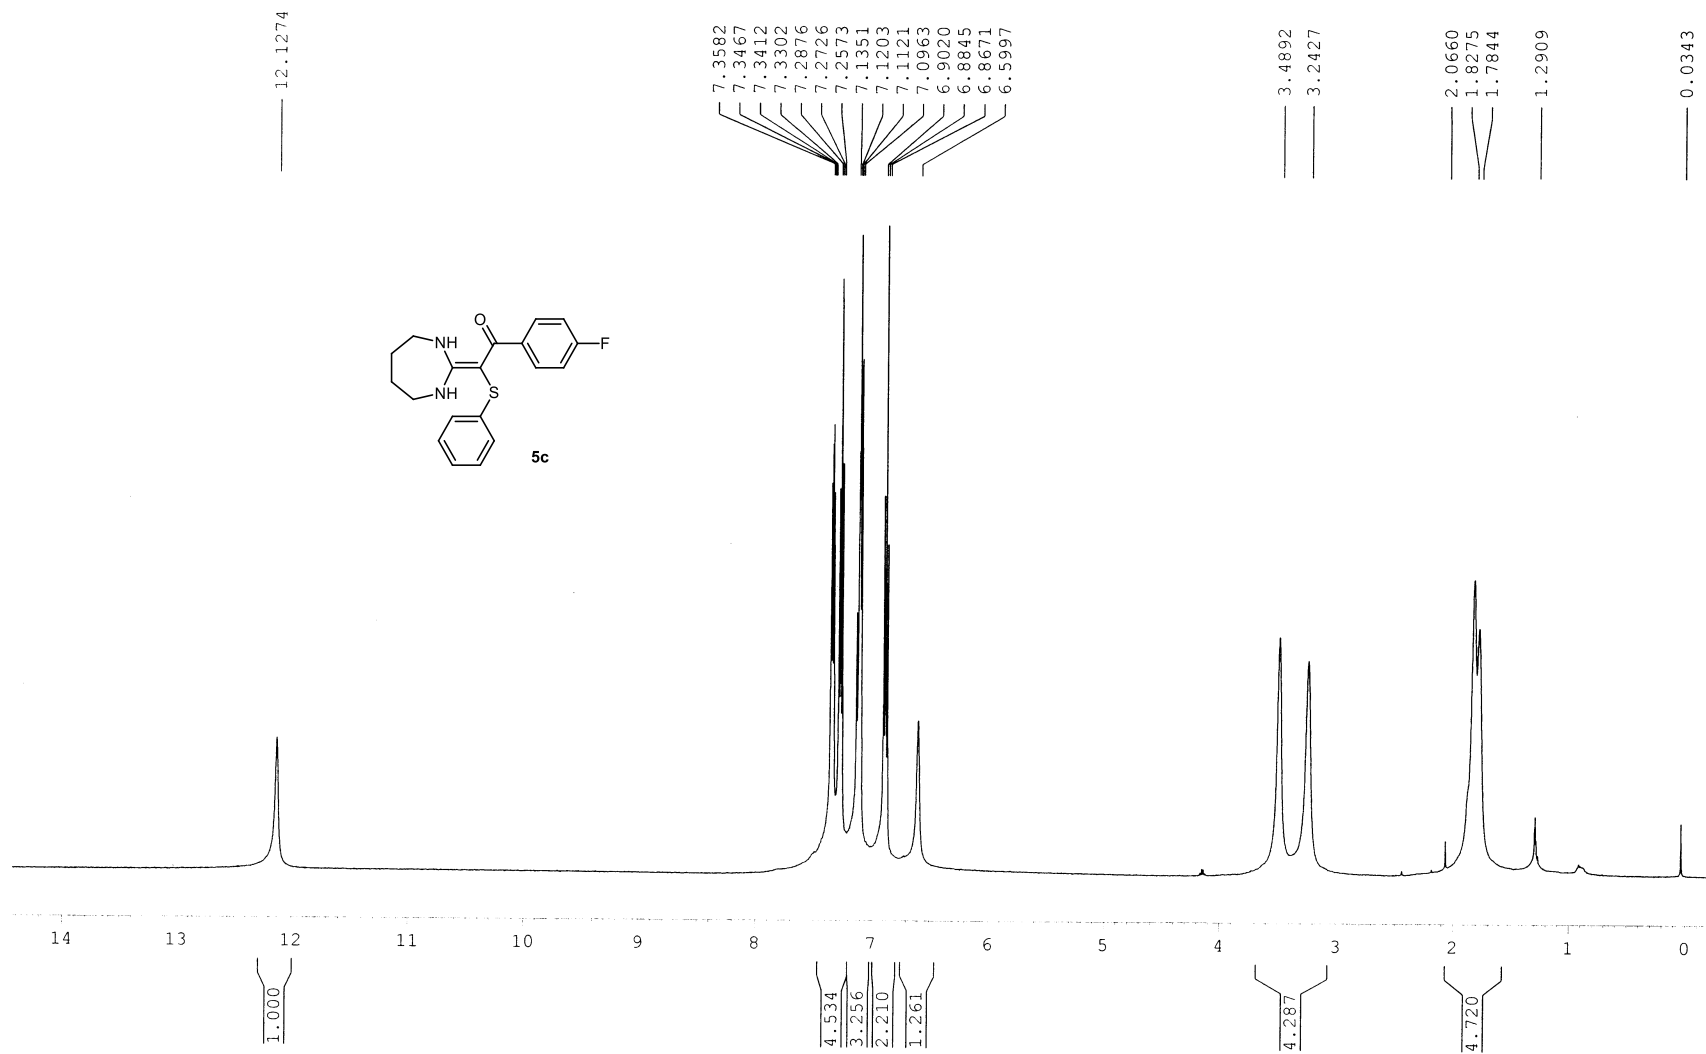

**Figure S75.**  $^1\text{H}$  NMR (500 MHz,  $\text{CDCl}_3$ ) spectra of compound **5c**

DEPT135

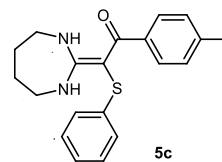

YUNNAN UNIVER. AV. DRX500  
jiangxiuyang JXY-42 in CDCl<sub>3</sub>  
13042403

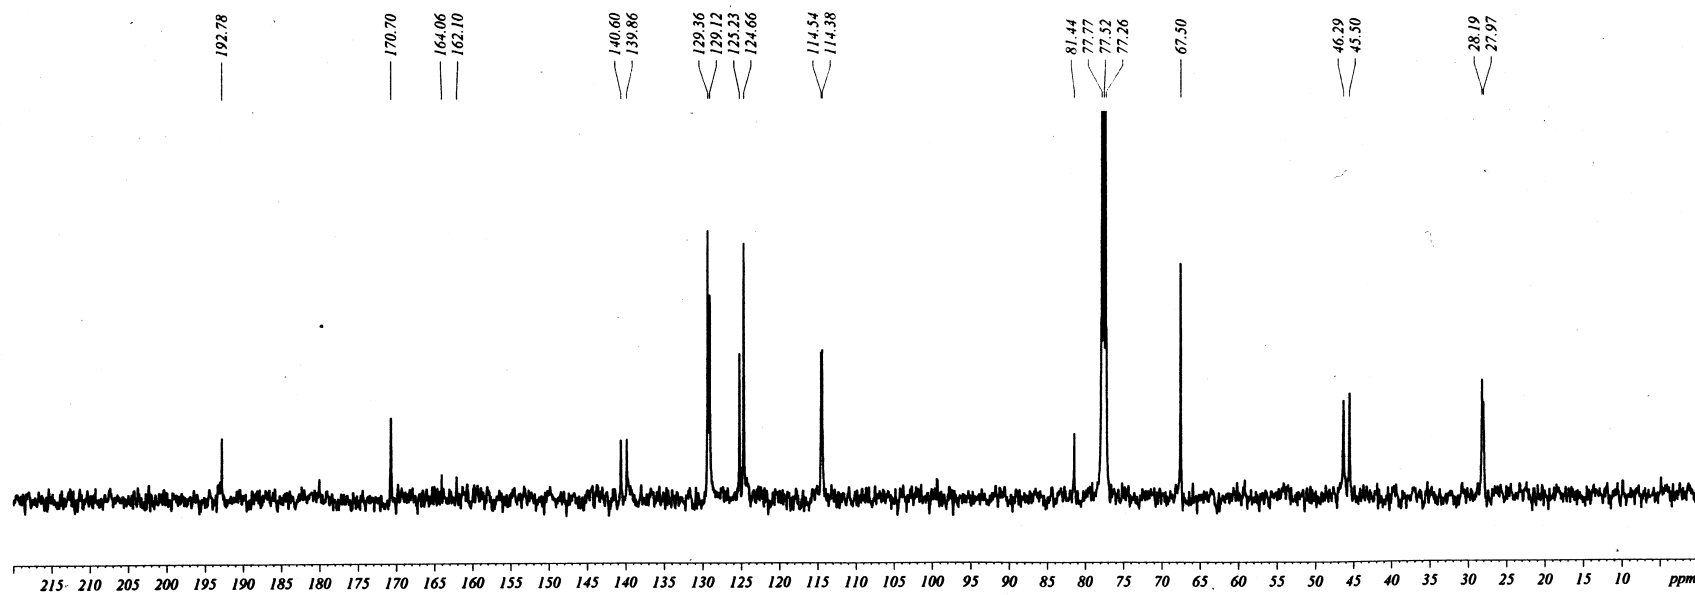

Figure S76. <sup>13</sup>C NMR (125 MHz, CDCl<sub>3</sub>) spectra of compound 5c

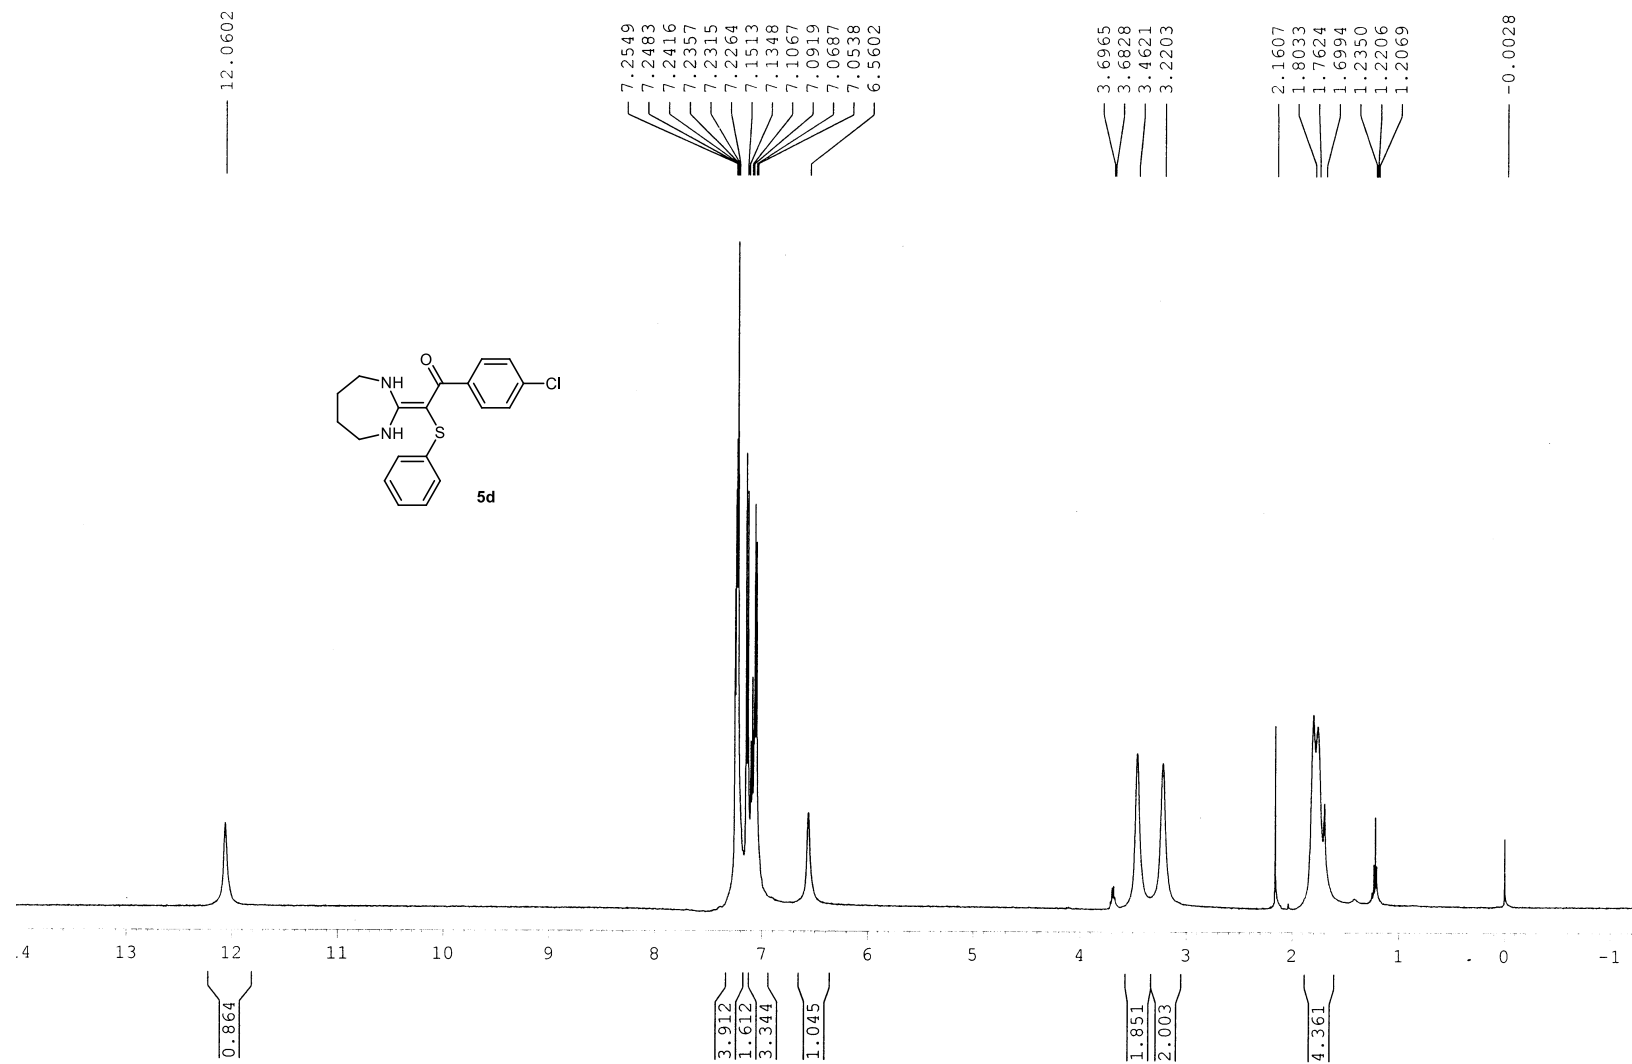

**Figure S77.**  $^1\text{H}$  NMR (500 MHz,  $\text{CDCl}_3$ ) spectra of compound **5d**

DEPT135

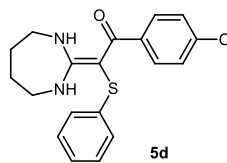

YUNNAN UNIVER. AV. DRX500  
jiangxiyang JXY-41 in CDCl<sub>3</sub>  
13052902

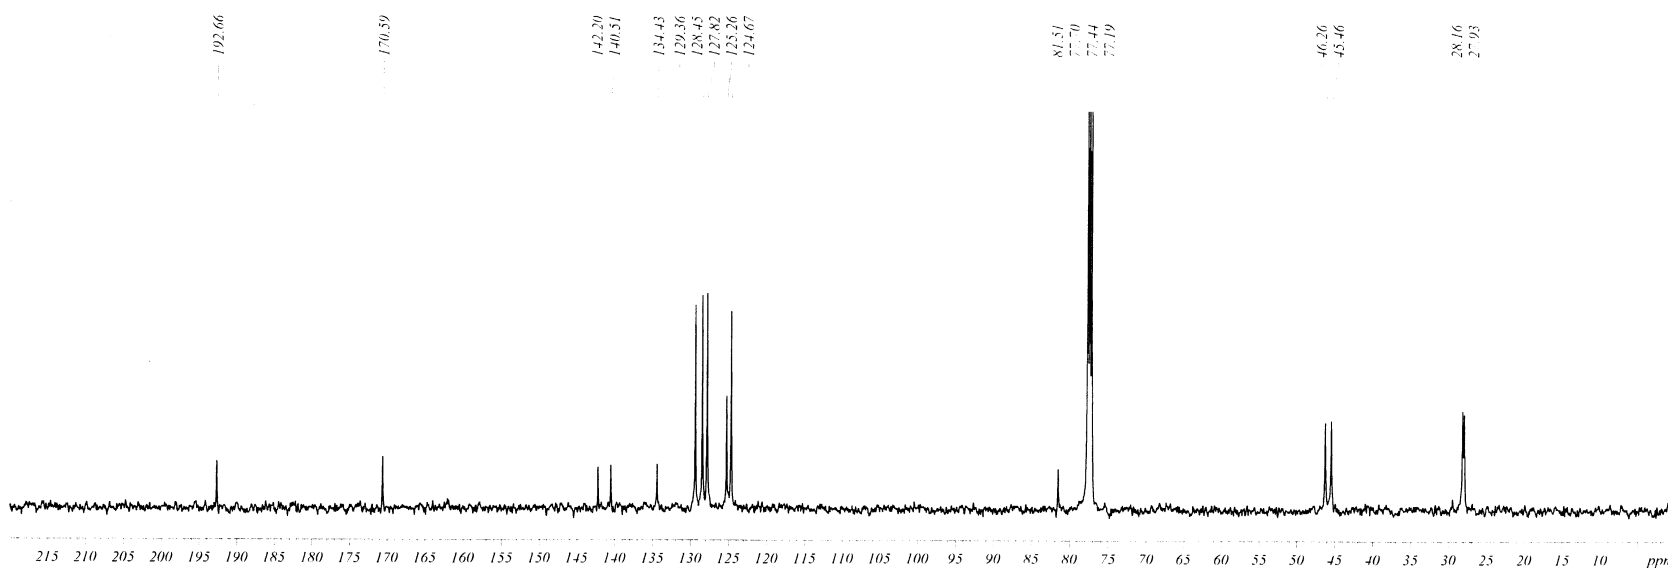

Figure S78. <sup>13</sup>C NMR (125 MHz, CDCl<sub>3</sub>) spectra of compound 5d

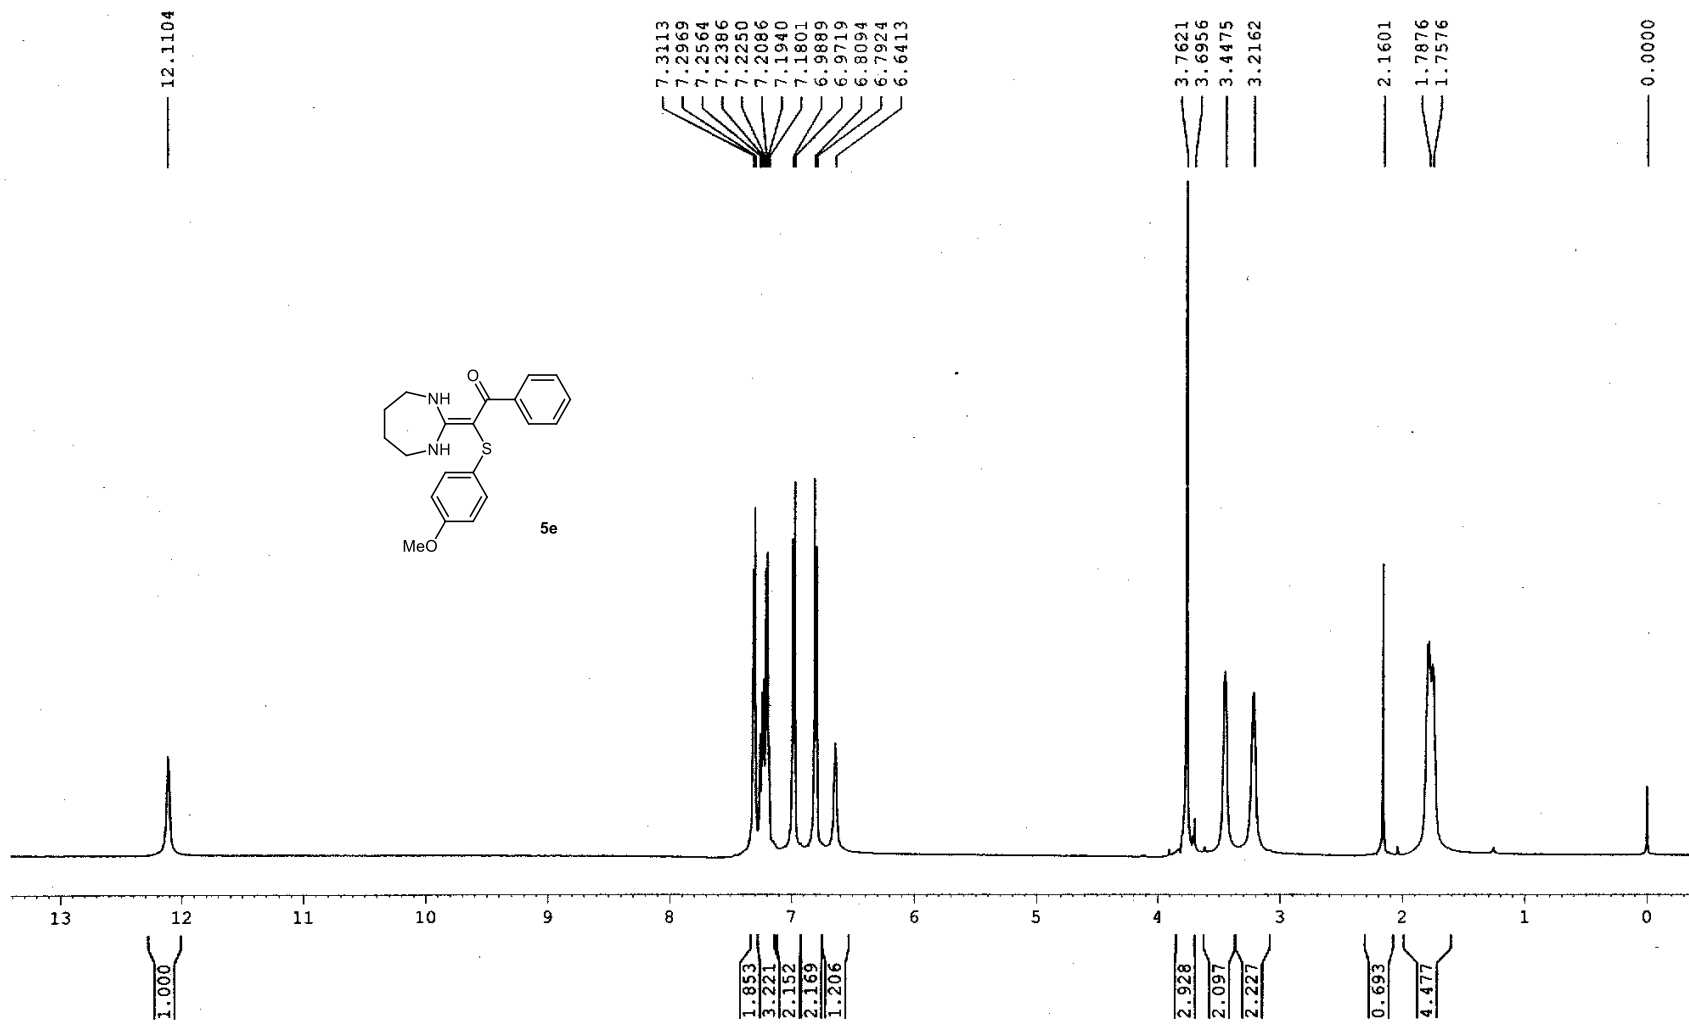

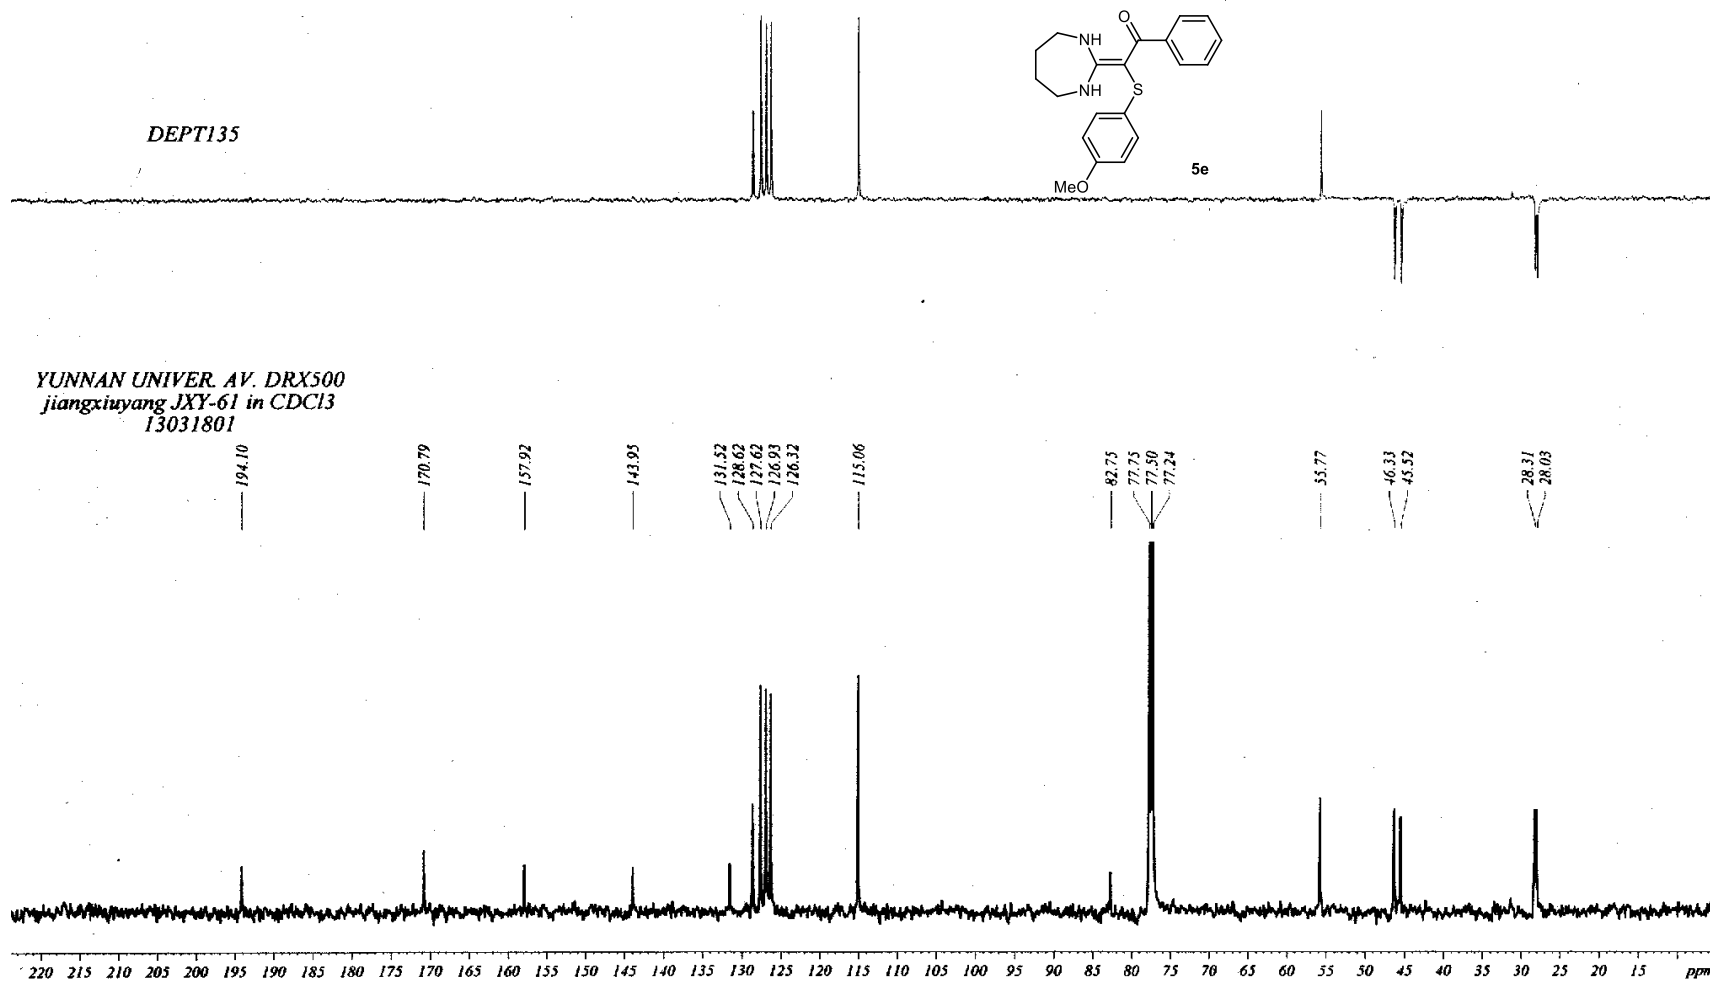

Figure S80. <sup>13</sup>C NMR (125 MHz, CDCl<sub>3</sub>) spectra of compound 5e



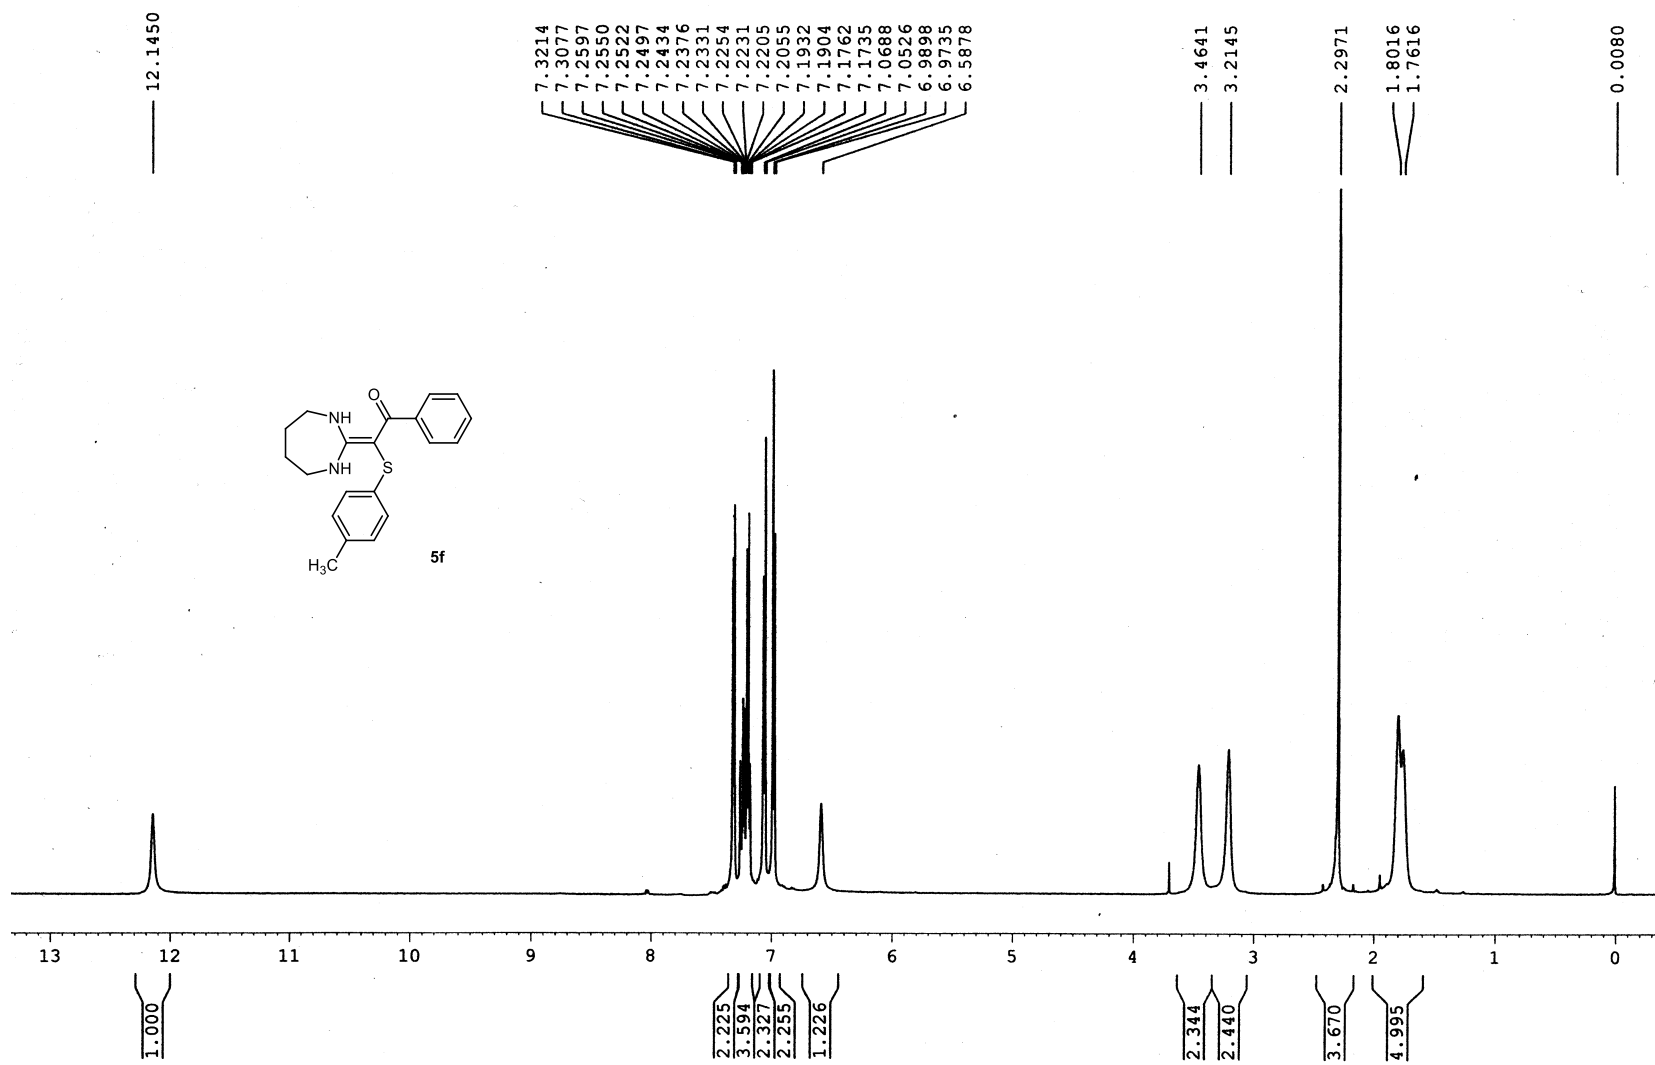

**Figure S81.** <sup>1</sup>H NMR (500 MHz, CDCl<sub>3</sub>) spectra of compound **5f**

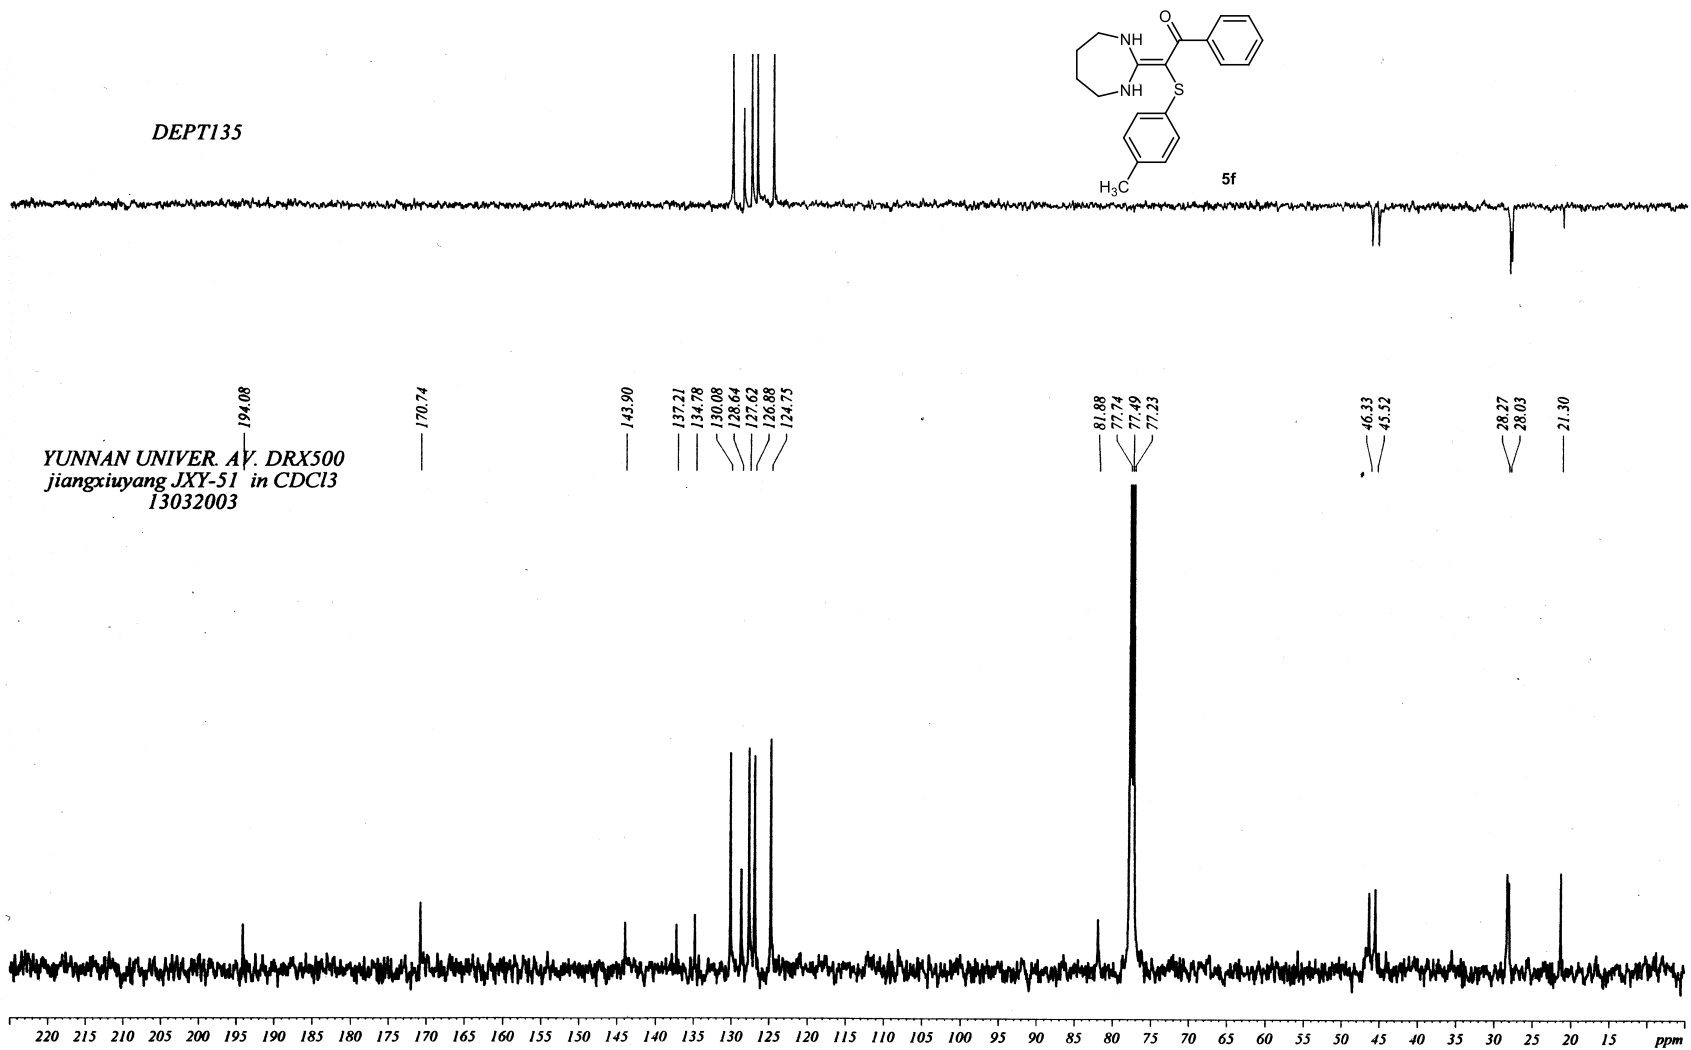

Figure S82. <sup>13</sup>C NMR (125 MHz, CDCl<sub>3</sub>) spectra of compound 5f

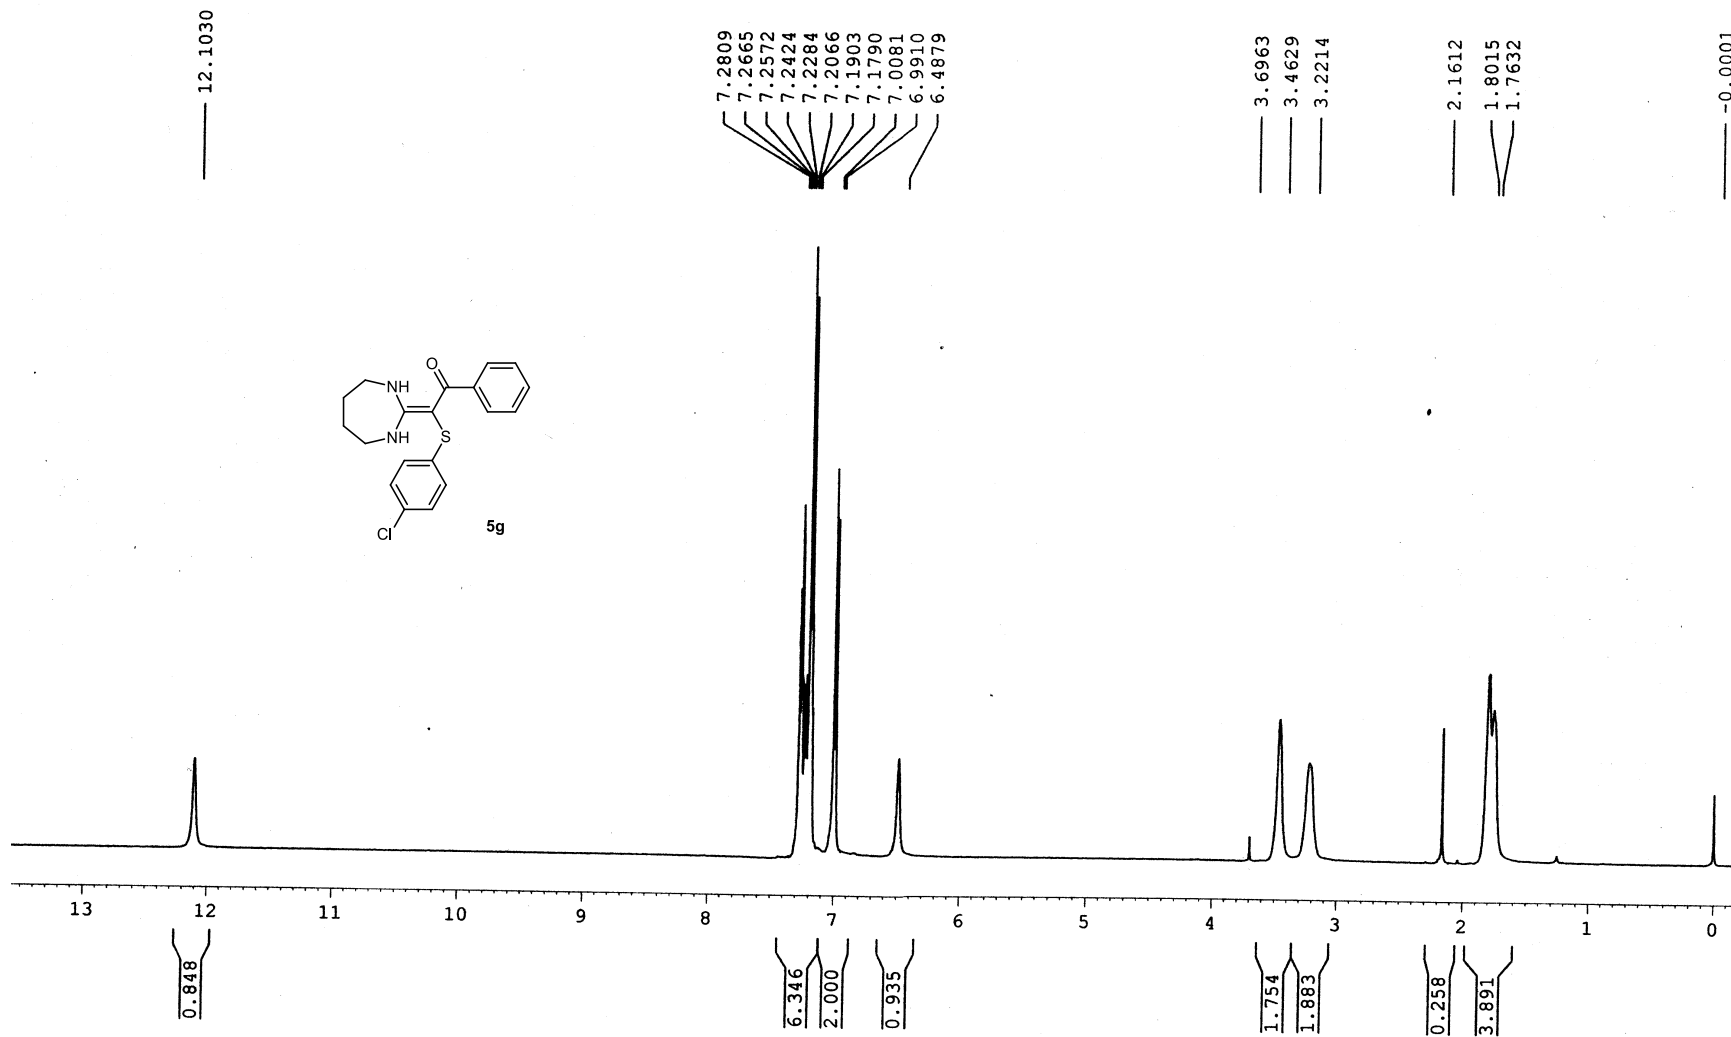

**Figure S83.** <sup>1</sup>H NMR (500 MHz, CDCl<sub>3</sub>) spectra of compound **5g**

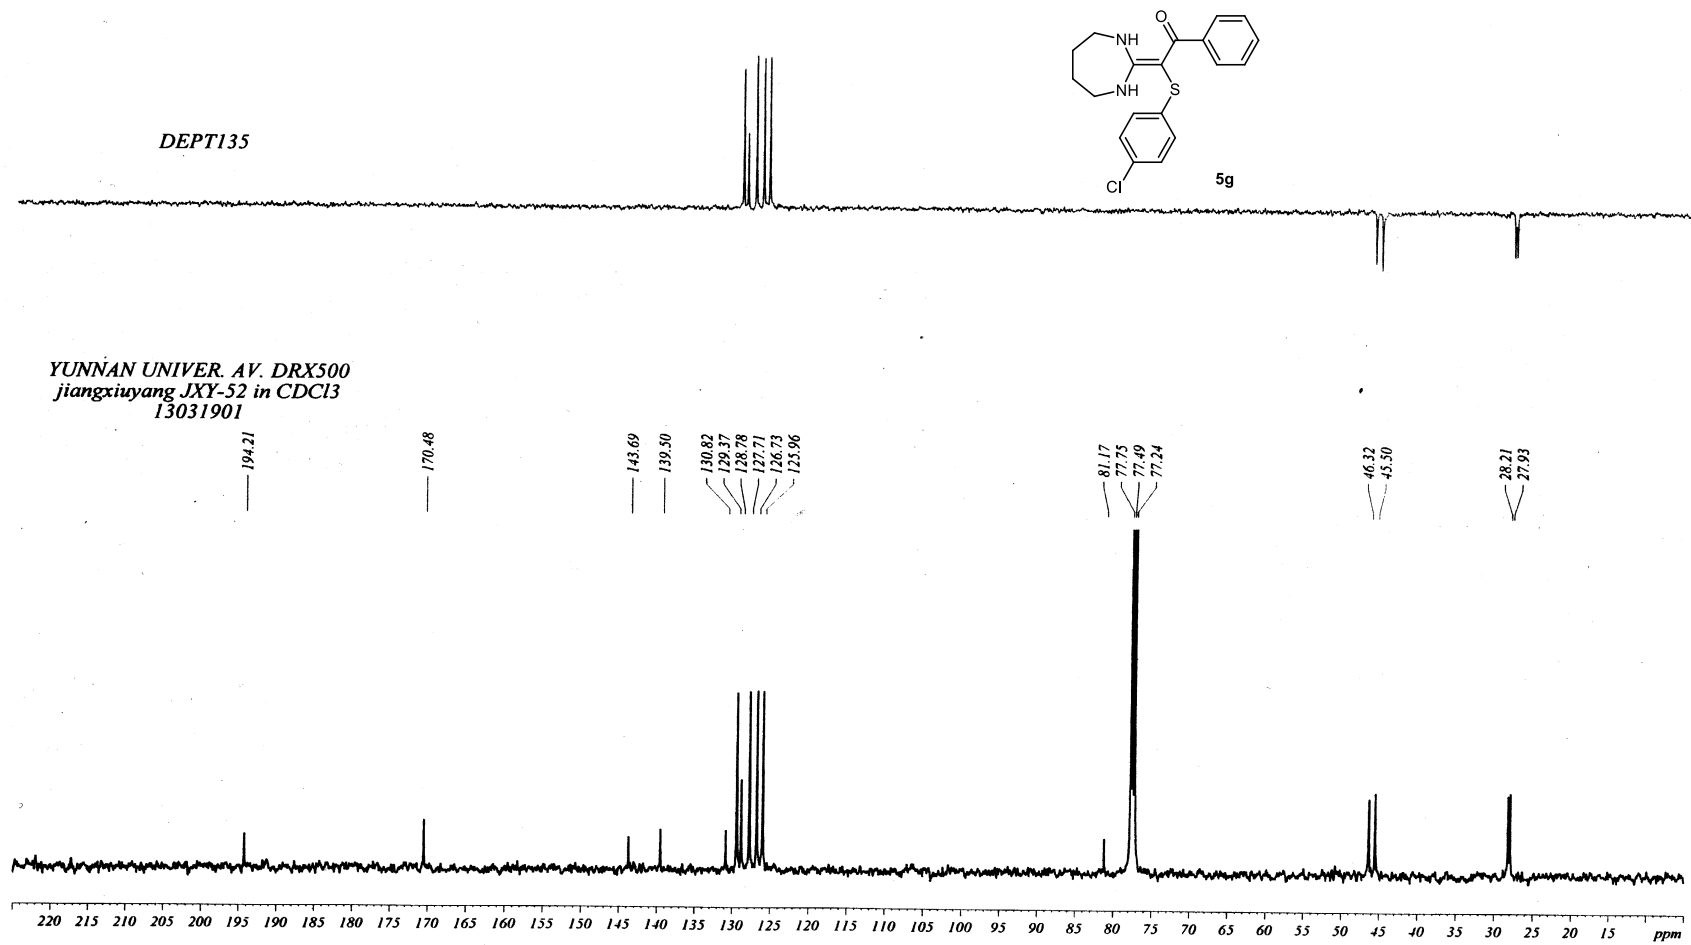

Figure S84. <sup>13</sup>C NMR (125 MHz, CDCl<sub>3</sub>) spectra of compound **5g**

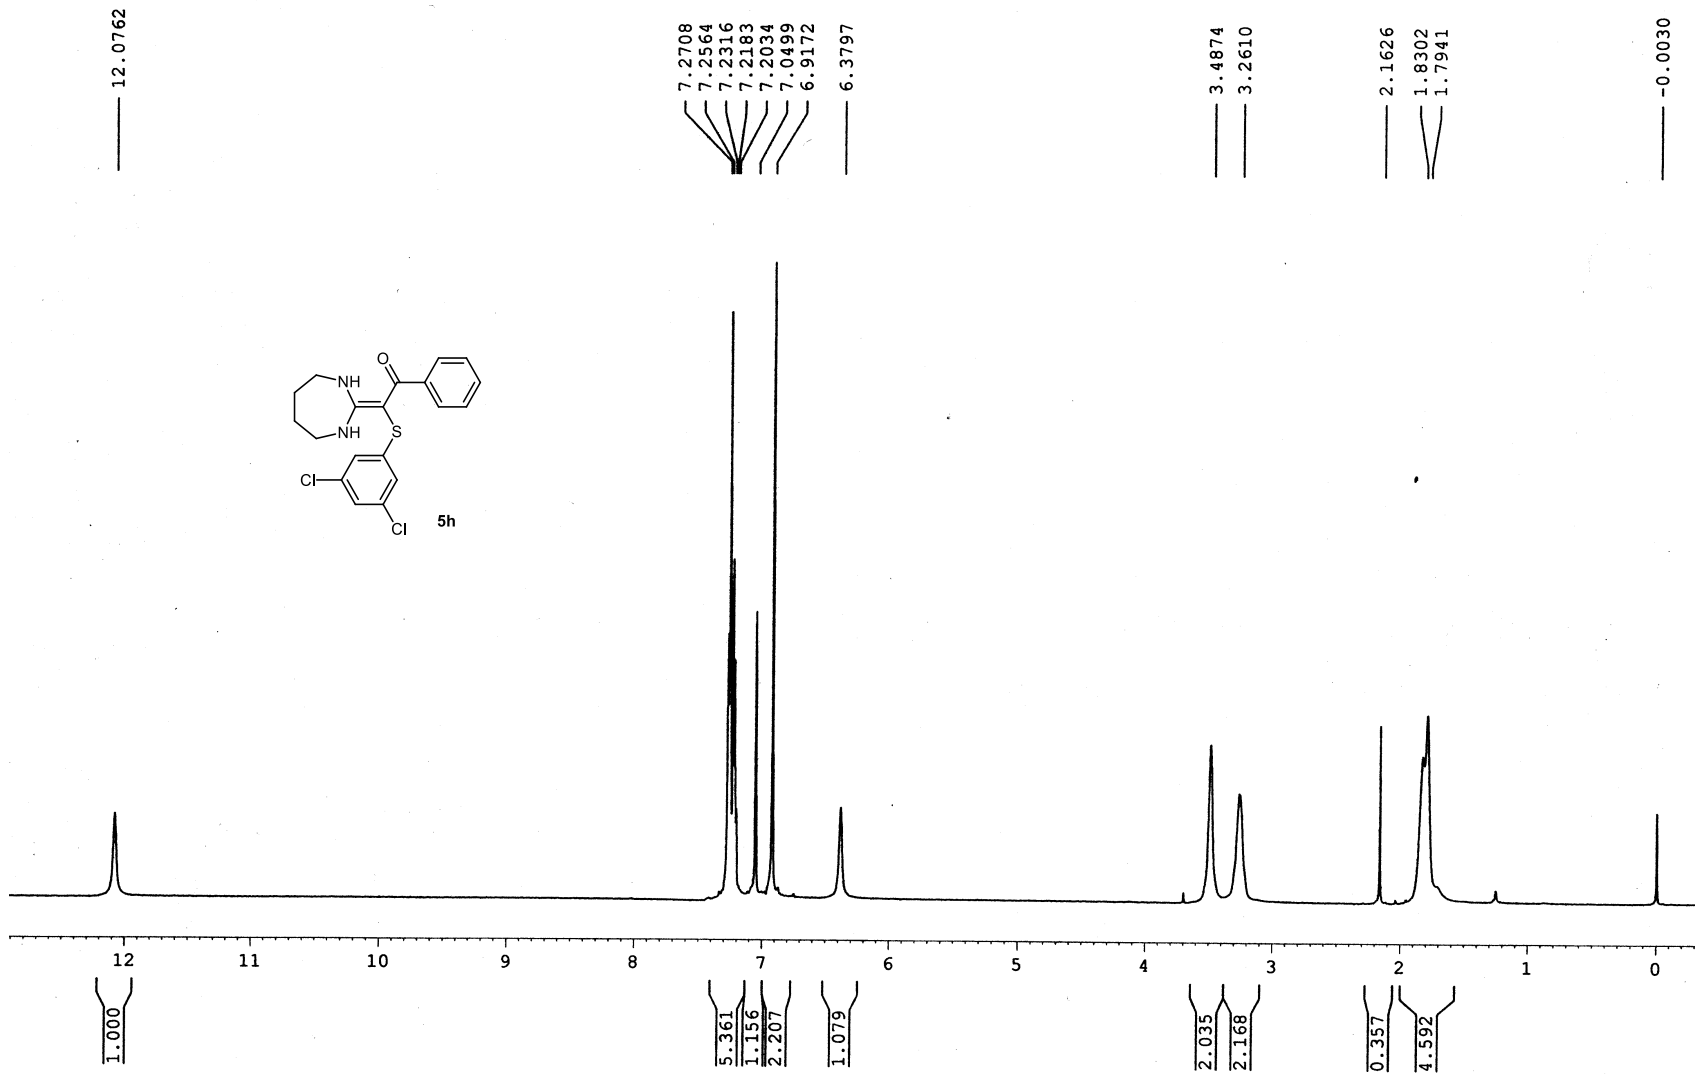

Figure S85. <sup>1</sup>H NMR (500 MHz, CDCl<sub>3</sub>) spectra of compound **5h**

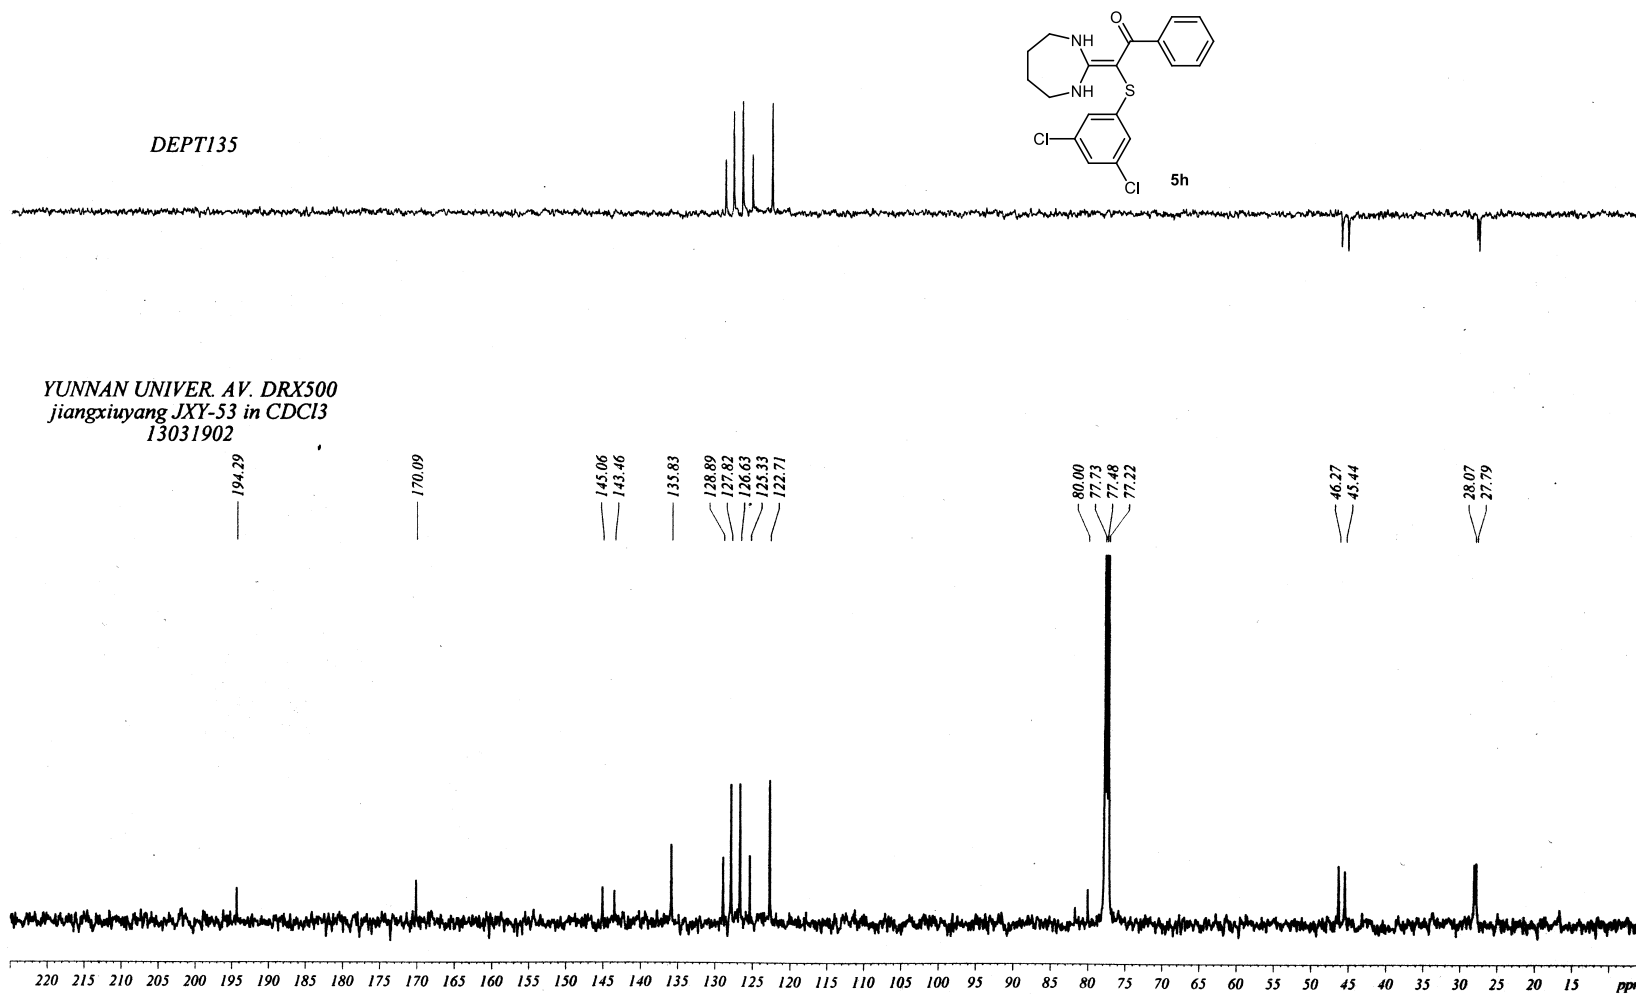

Figure S86. <sup>13</sup>C NMR (125 MHz, CDCl<sub>3</sub>) spectra of compound **5h**

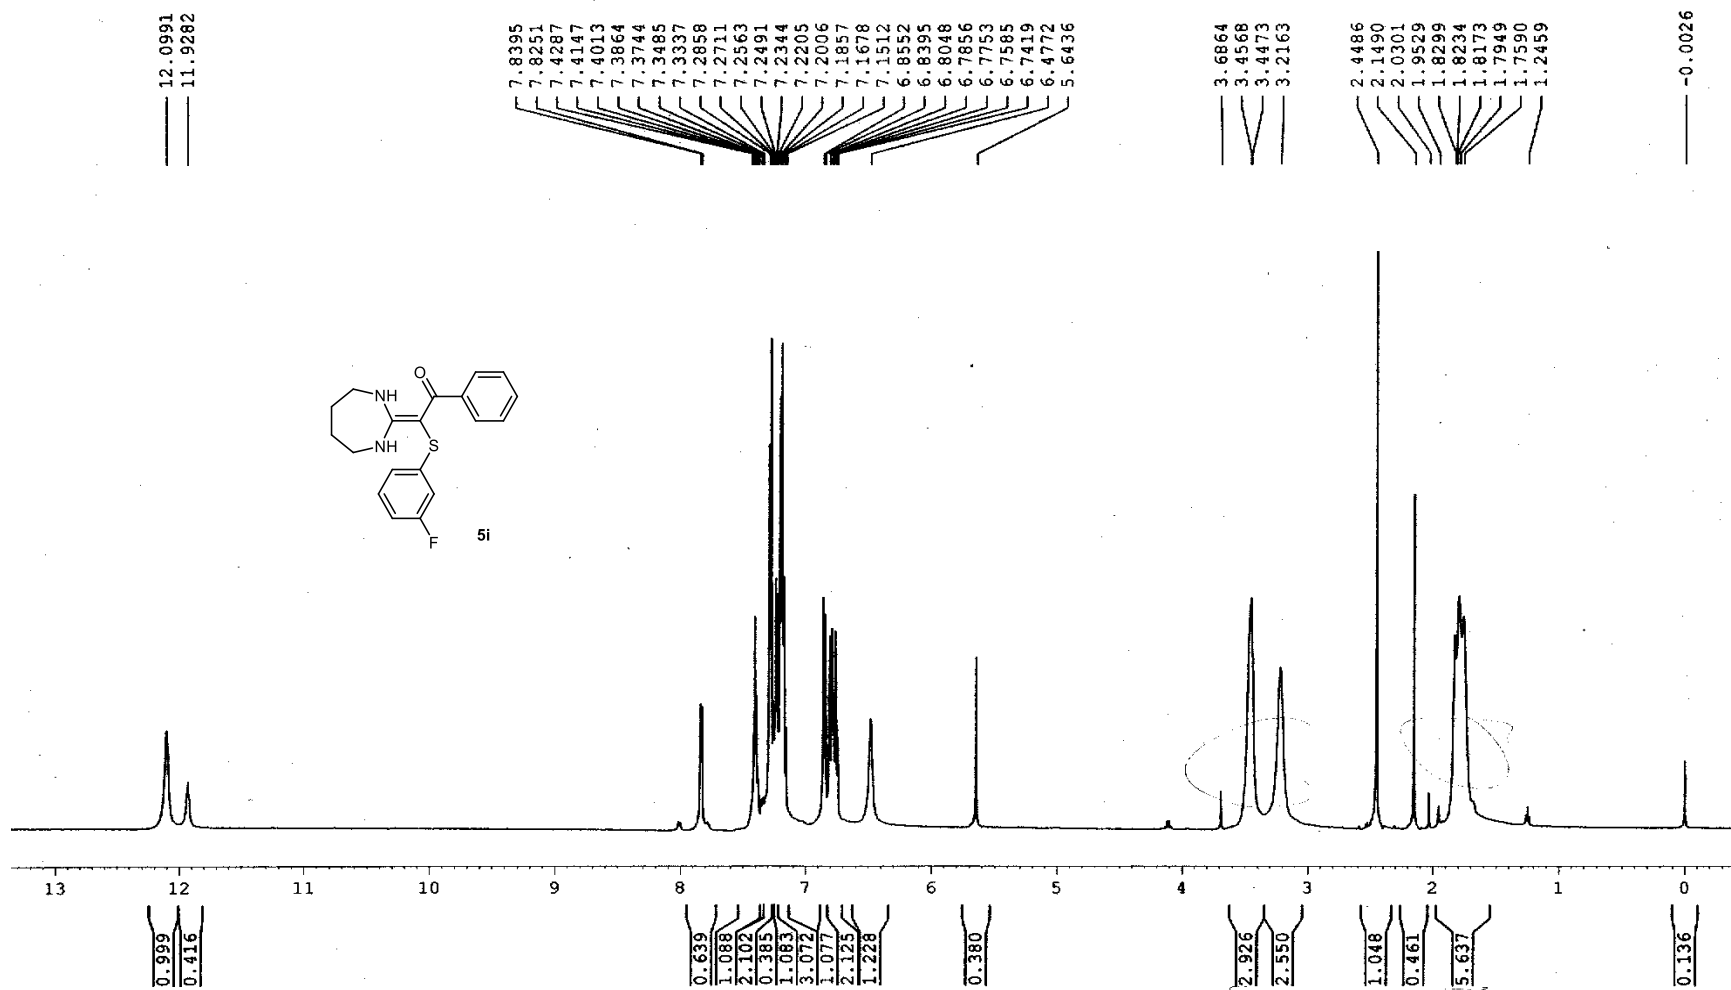

Figure S87.  $^1\text{H}$  NMR (500 MHz,  $\text{CDCl}_3$ ) spectra of compound **5i**

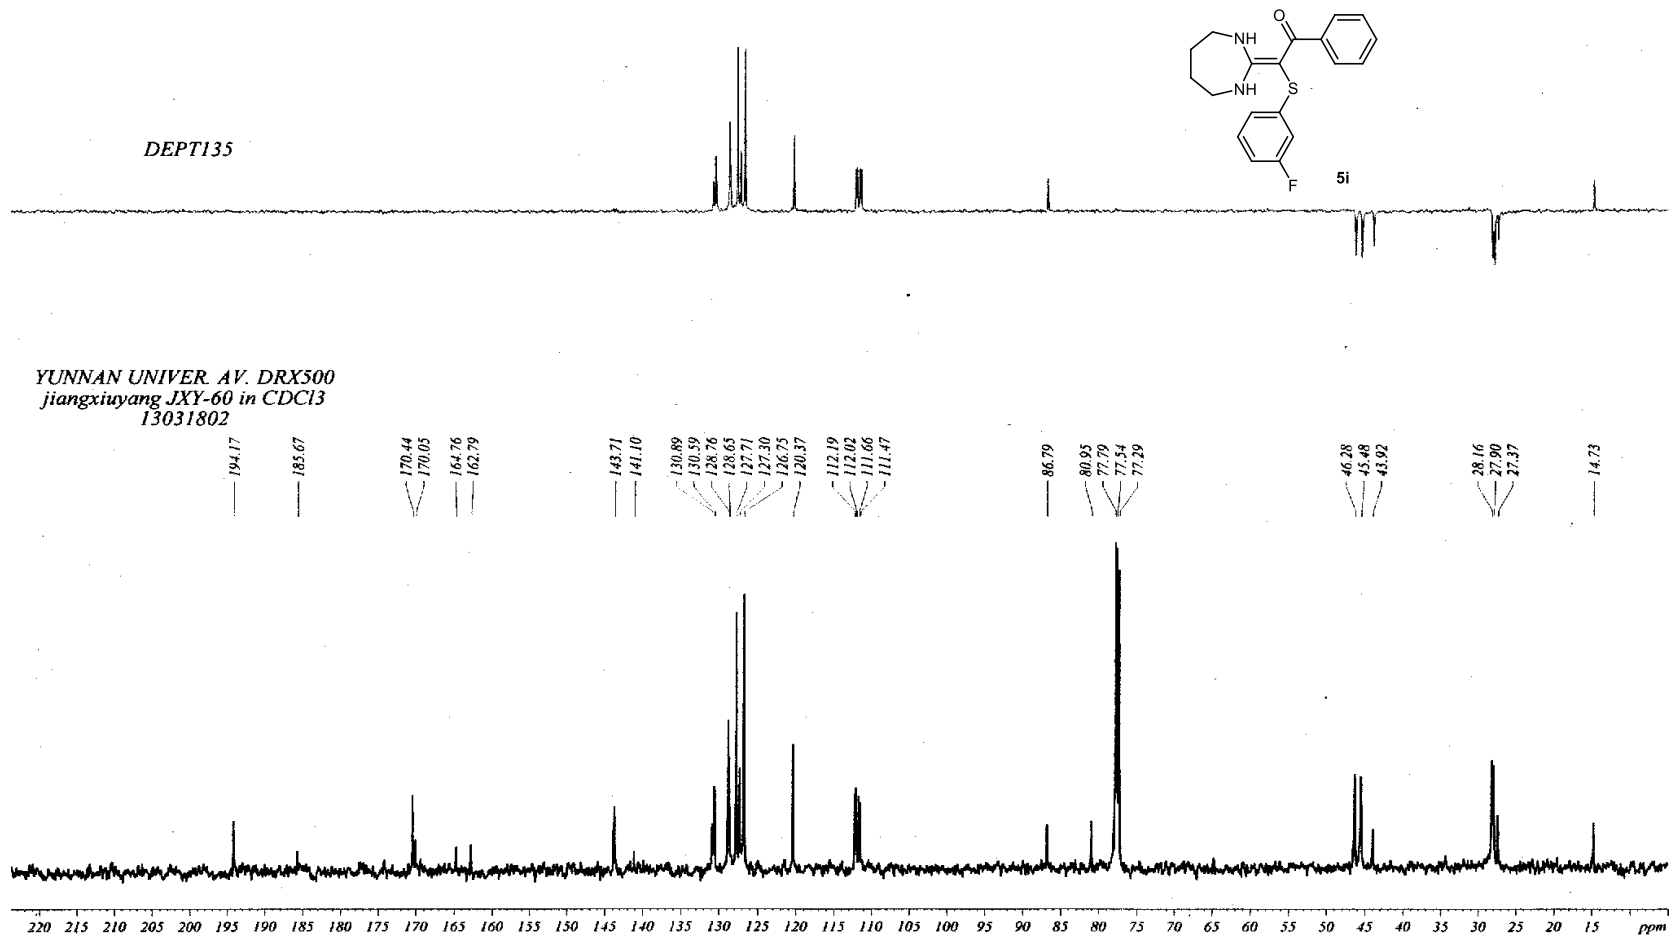

Figure S88. <sup>13</sup>C NMR (125 MHz, CDCl<sub>3</sub>) spectra of compound **5i**



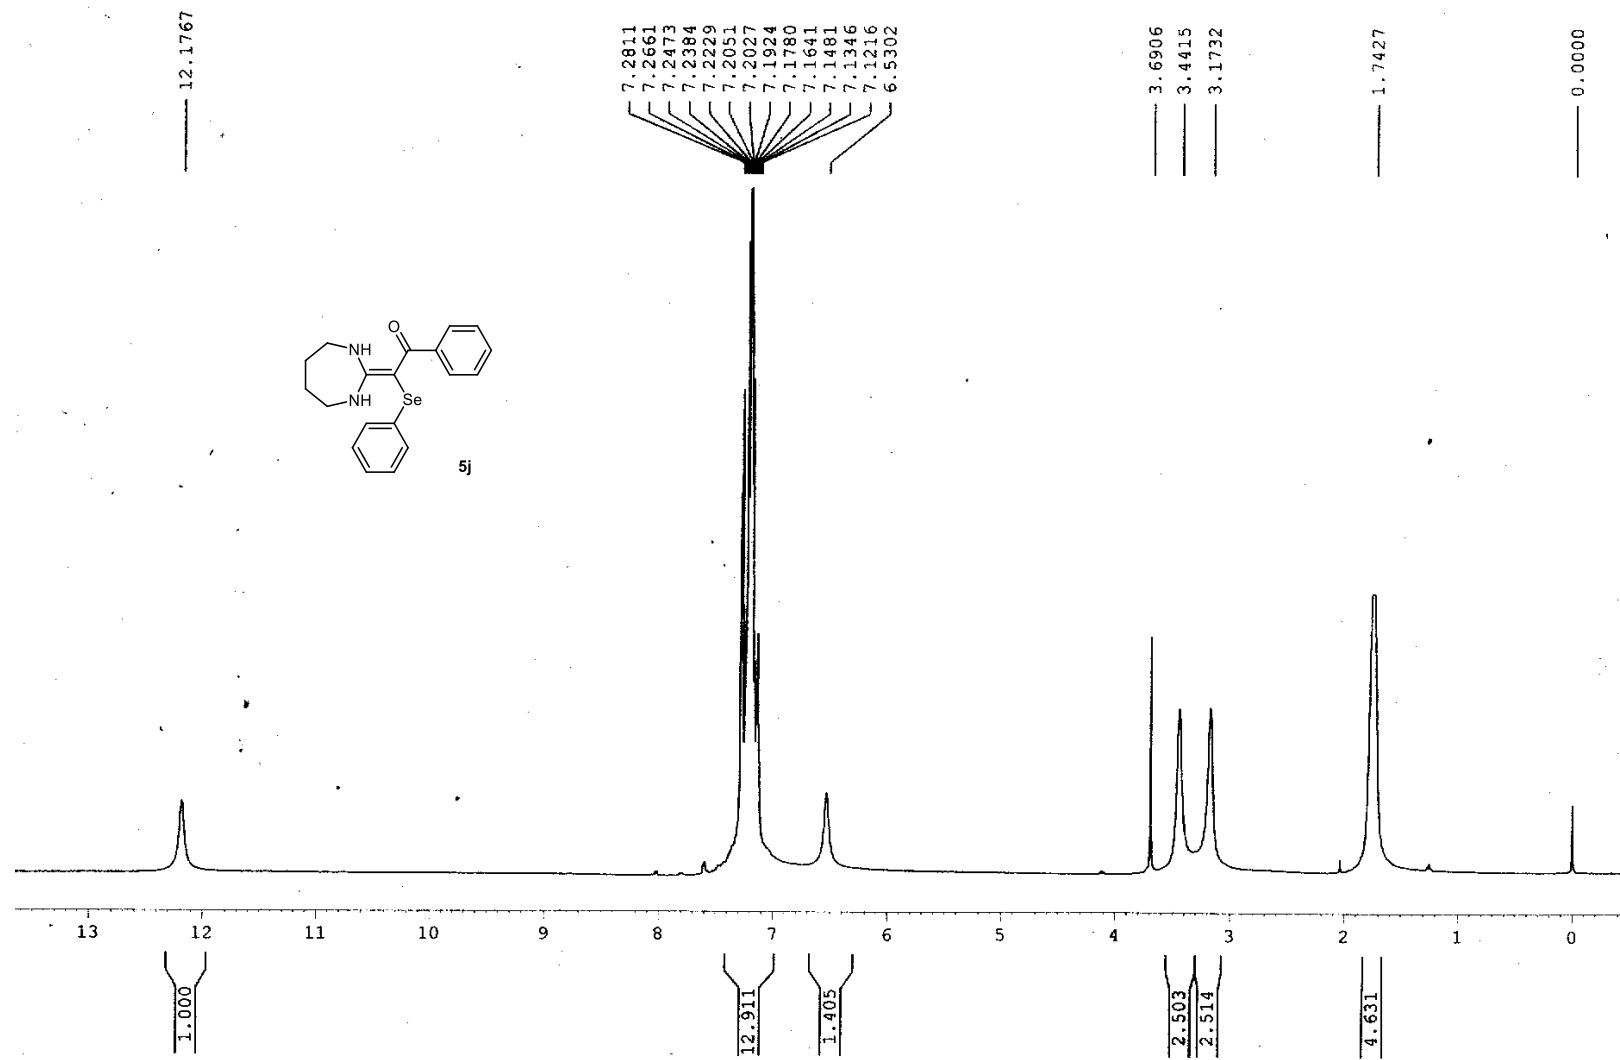

**Figure S89.** <sup>1</sup>H NMR (500 MHz, CDCl<sub>3</sub>) spectra of compound **5j**

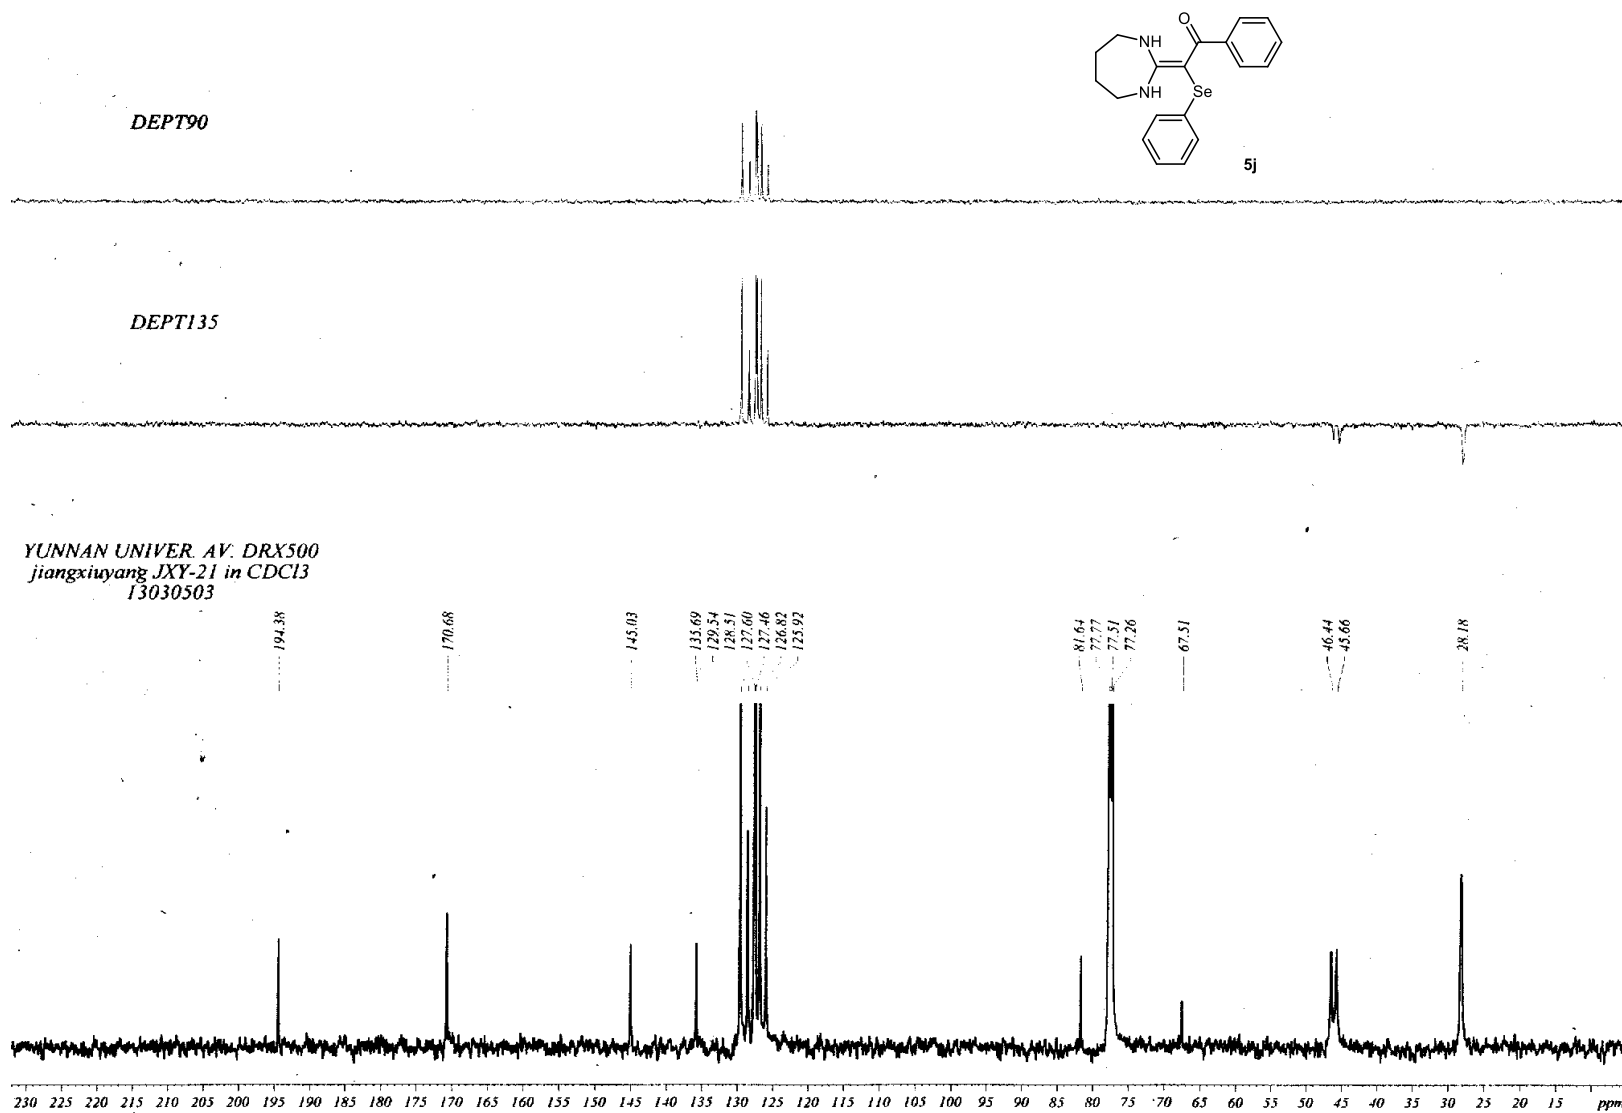

Figure S90. <sup>13</sup>C NMR (125 MHz, CDCl<sub>3</sub>) spectra of compound 5j

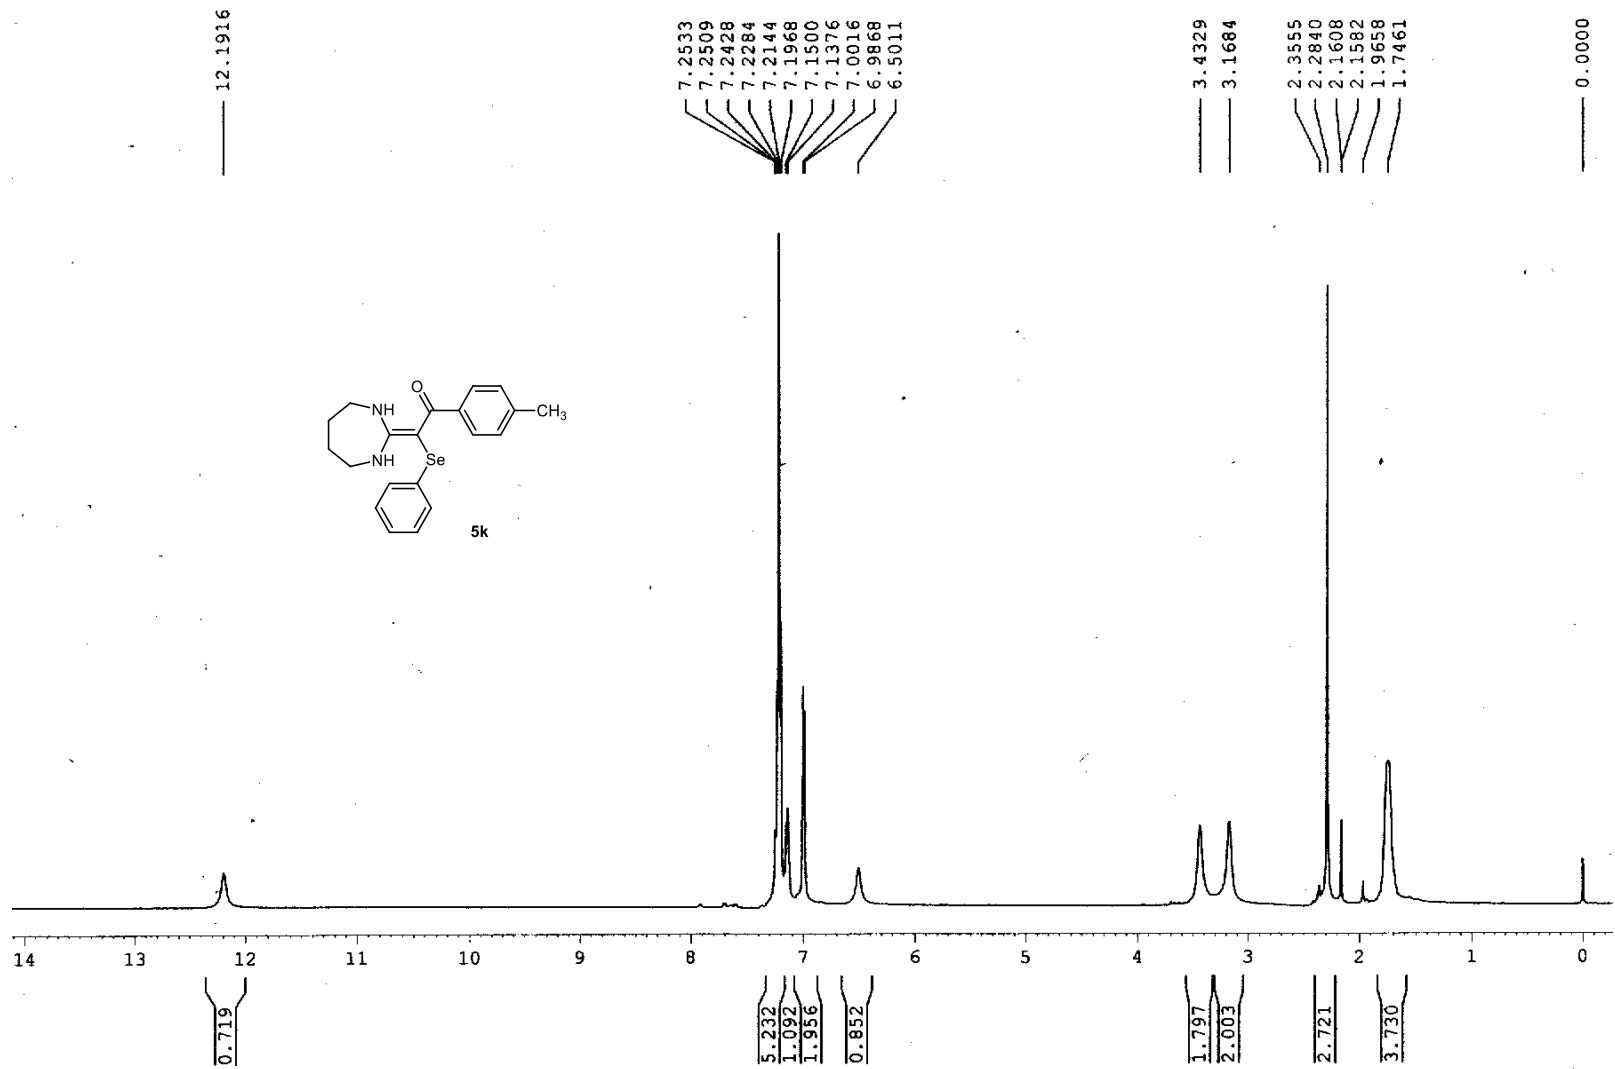

Figure S91. <sup>1</sup>H NMR (500 MHz, CDCl<sub>3</sub>) spectra of compound **5k**

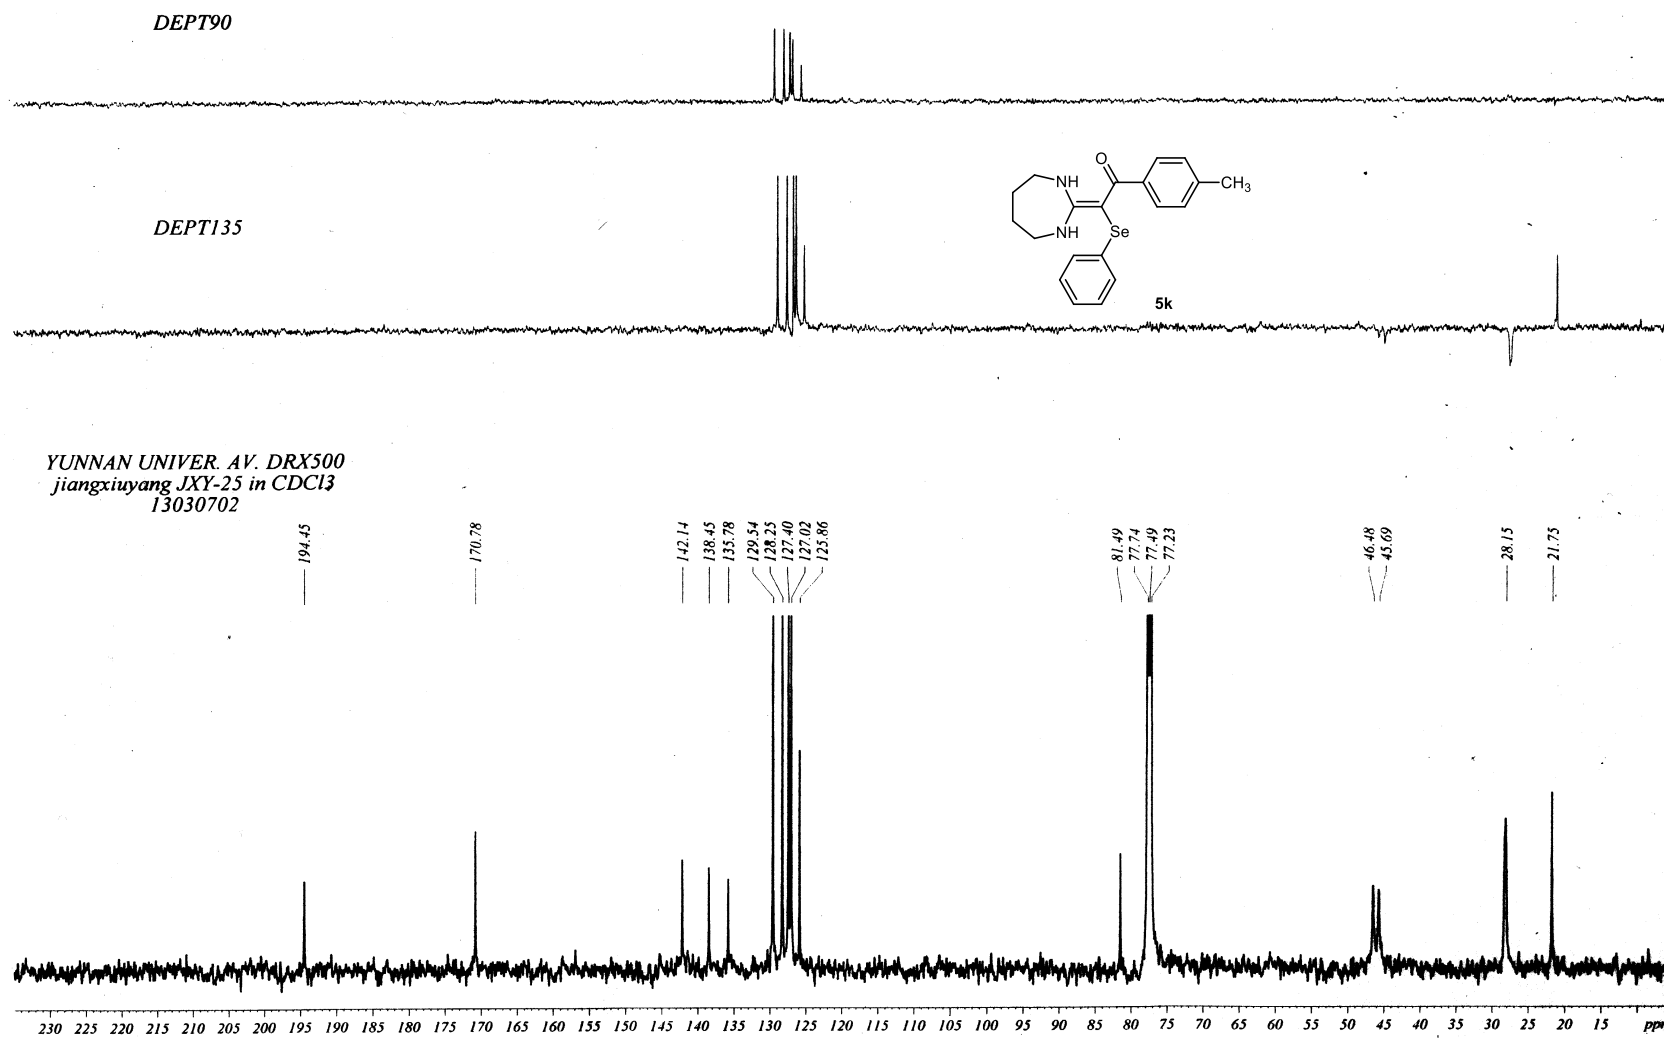

Figure S92. <sup>13</sup>C NMR (125 MHz, CDCl<sub>3</sub>) spectra of compound 5k

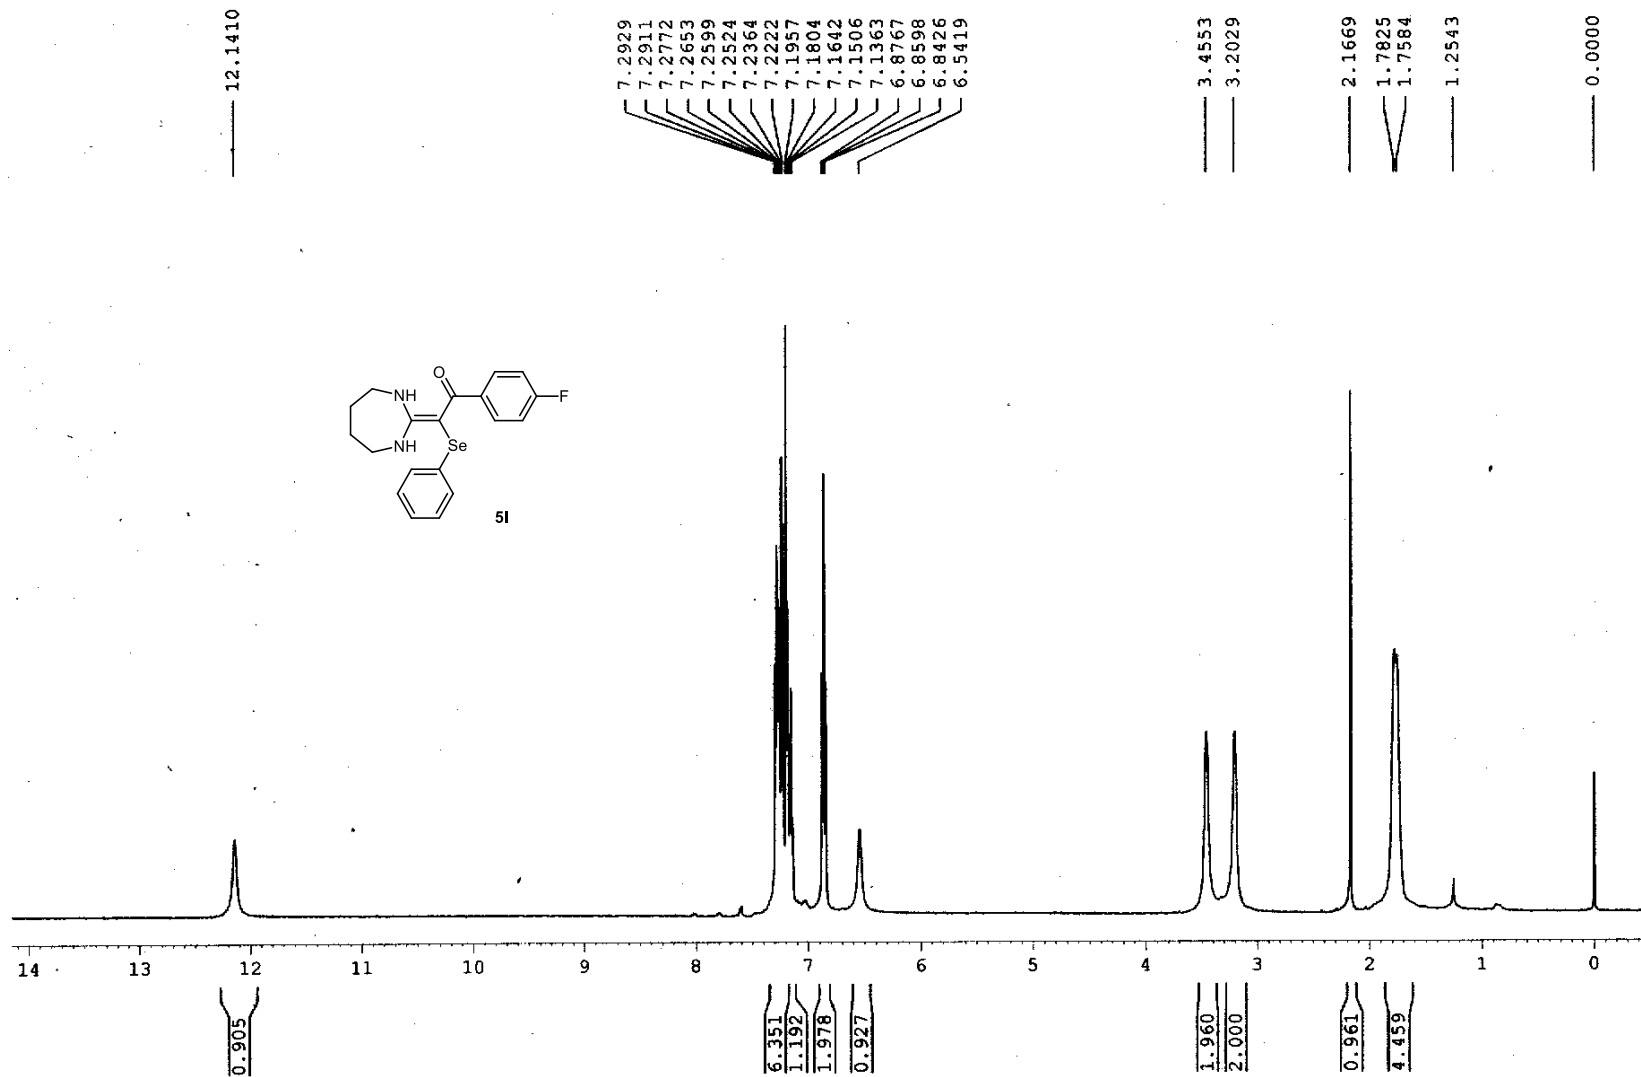

**Figure S93.**  $^1\text{H}$  NMR (500 MHz,  $\text{CDCl}_3$ ) spectra of compound **5l**

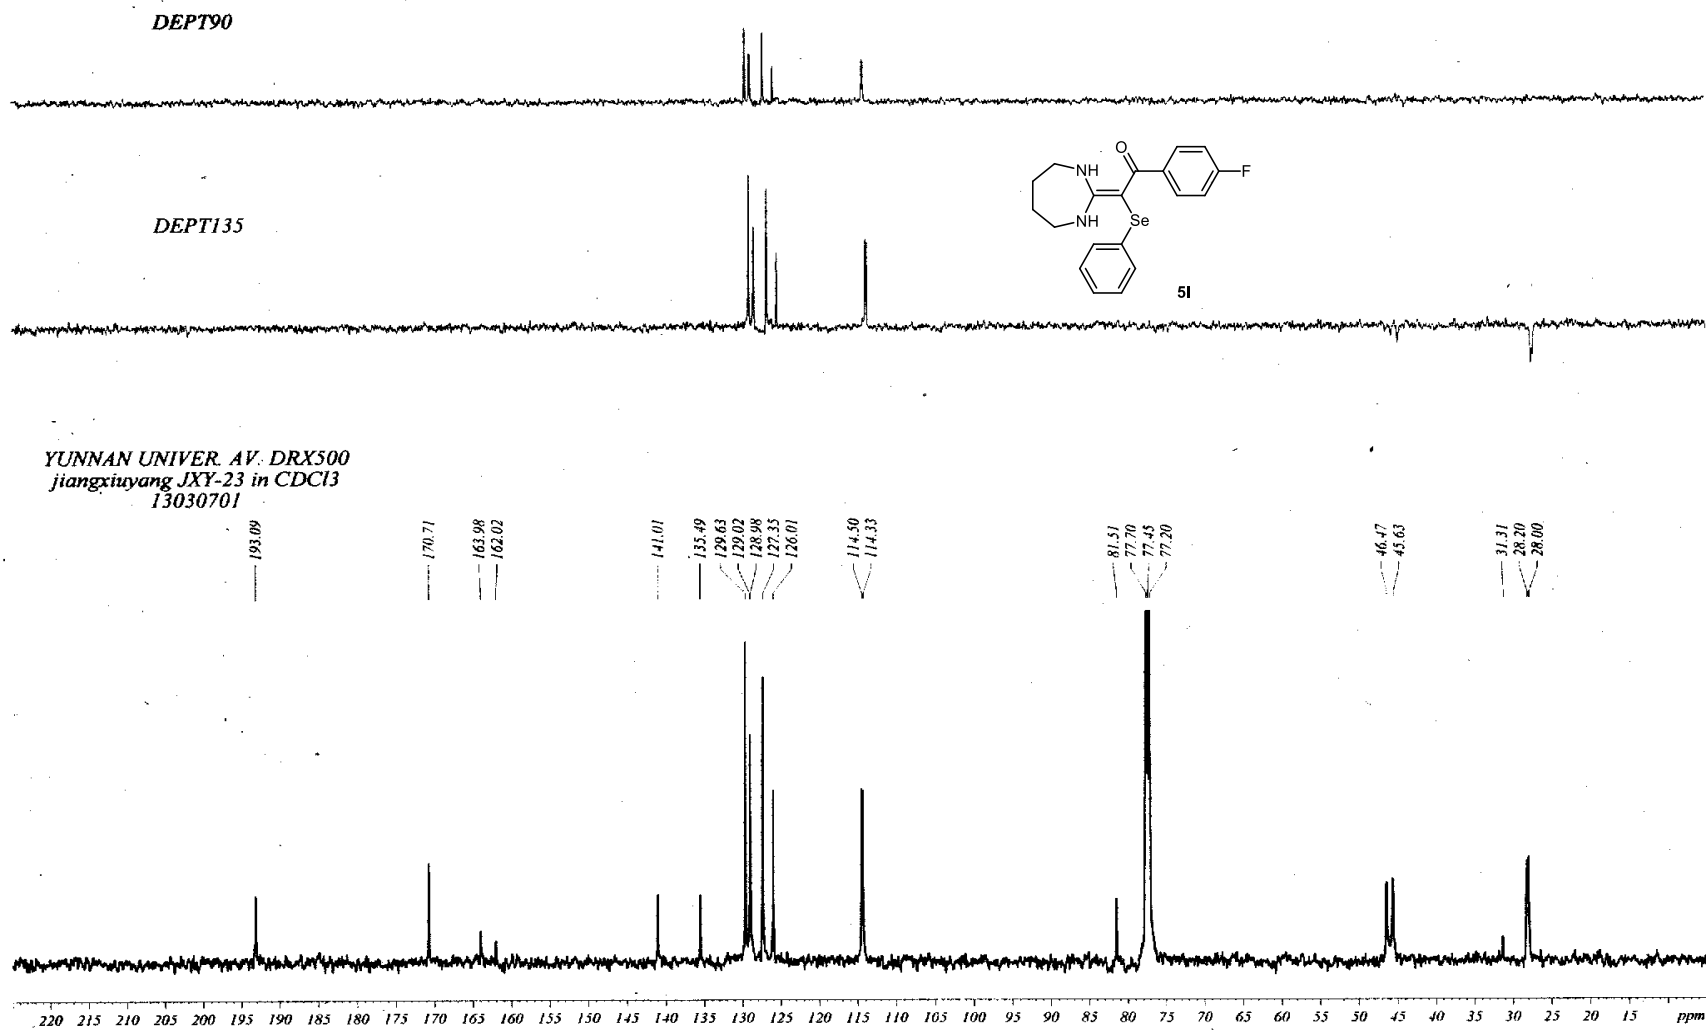

Figure S94. <sup>13</sup>C NMR (125 MHz, CDCl<sub>3</sub>) spectra of compound 51

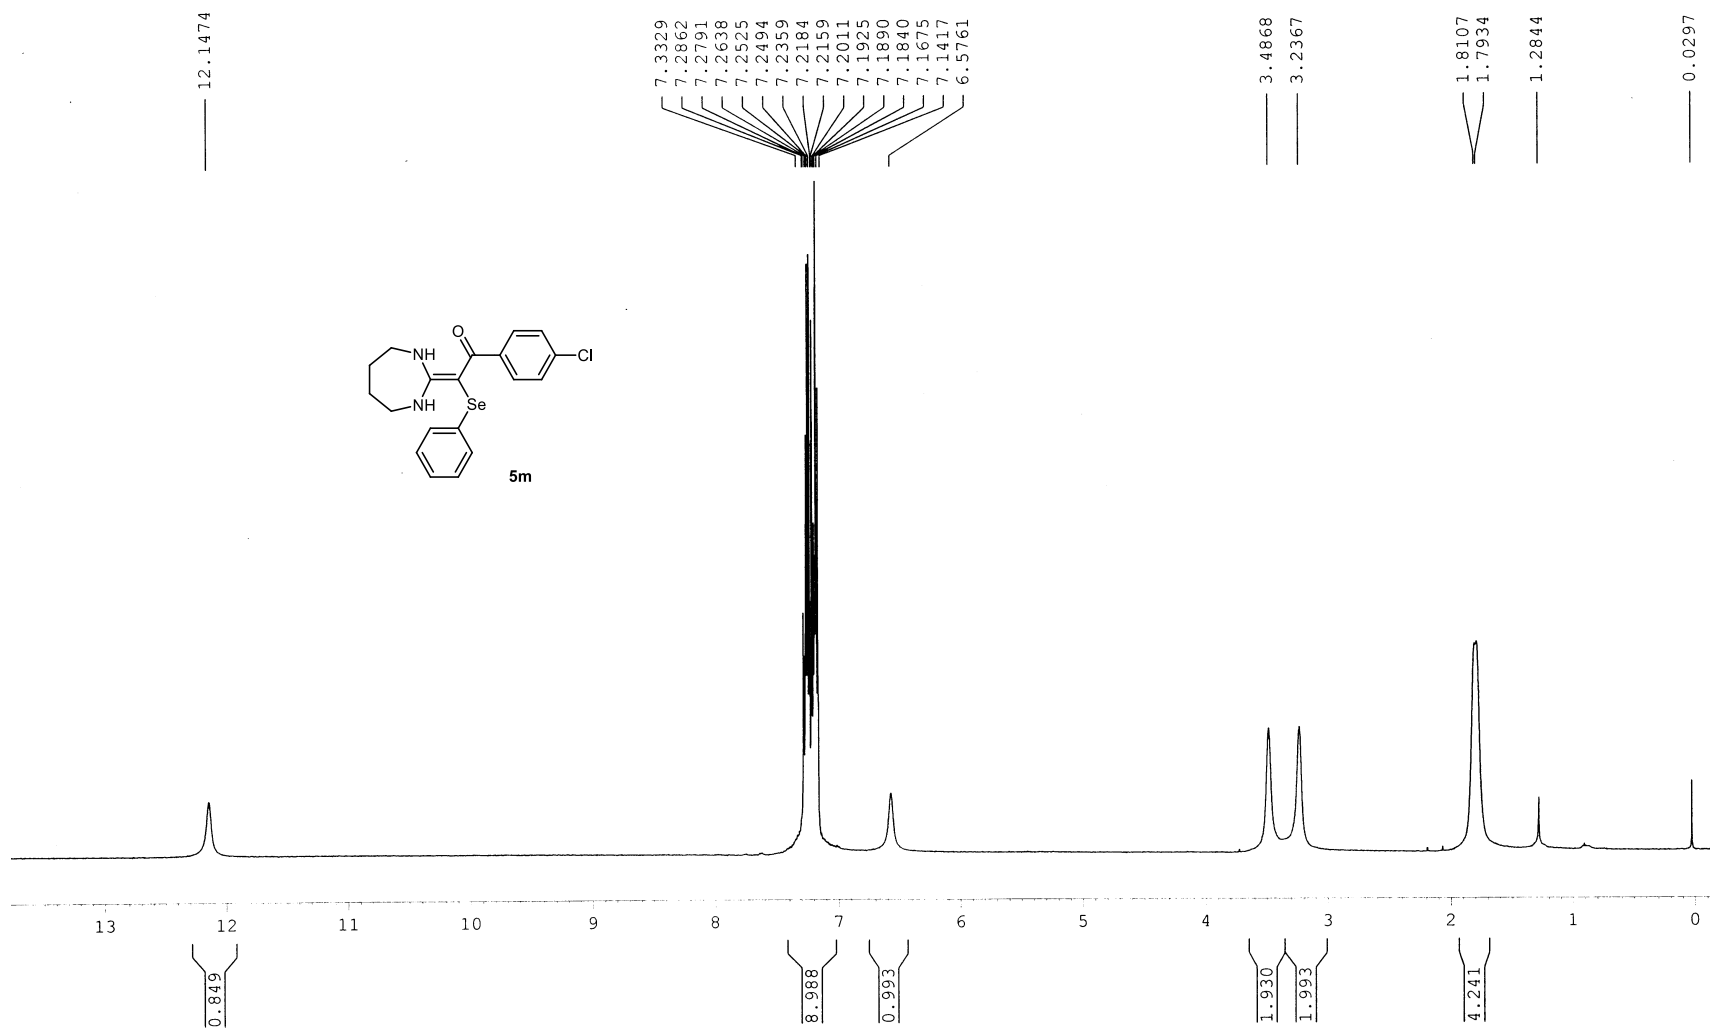

**Figure S95.** <sup>1</sup>H NMR (500 MHz, CDCl<sub>3</sub>) spectra of compound **5m**

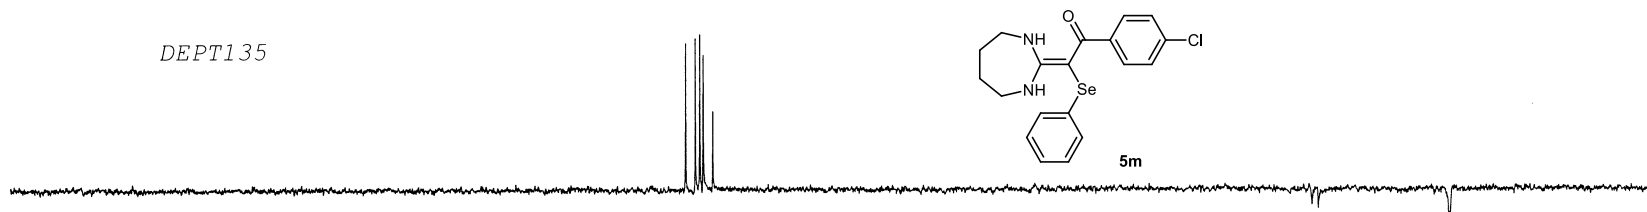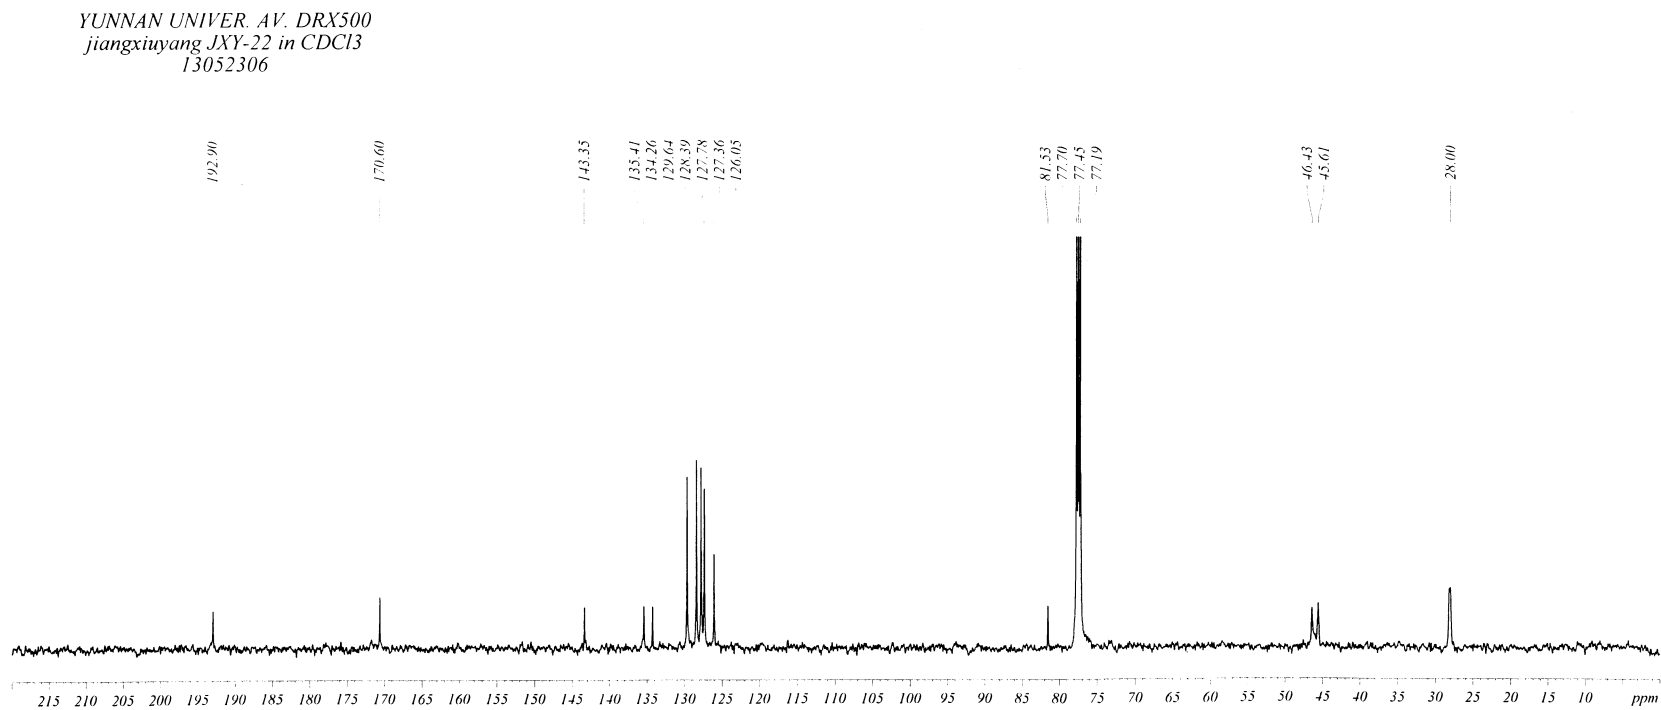

Figure S96. <sup>13</sup>C NMR (125 MHz, CDCl<sub>3</sub>) spectra of compound **5m**



## Notes and References

1. (a) Huang, Z.-T.; Wang, M.-X. *Synthesis* **1992**, *12*, 1273–1276. (b) Li, Z.-J.; Charles, D. *Synth. Commun.* **2001**, *31*, 527–533. (c) X.-B. Chen, X.-M. Liu, R. Huang, S.-J. Yan, J. Lin, *Eur, J. Org. Chem.* **2013**, 4607.
2. CCDC 949284 which containing in the electronic supplementary information (ESI) for crystallographic data of compound **3g**. This material is available free of charge from The Cambridge Crystallographic Data Center *via* the Internet at [www.ccdc.cam.ac.uk/data\\_request/cif](http://www.ccdc.cam.ac.uk/data_request/cif).
